# Supplementary material for: Alzheimer’s disease-associated (hydroxy)methylomic changes in the brain and blood
Source: Clin Epigenetics. 2019 Nov 27;11:164. doi: 10.1186/s13148-019-0755-5 (PMC6880587; doi:10.1186/s13148-019-0755-5)
Supplement: Supplementary file 1 — Additional file 1. All Supplementary Tables (1–10), including descriptions. [file 13148_2019_755_MOESM1_ESM.xlsx]

## Sheet: T1. MTG MPs
	Supplementary Table 1. Top 1000 Methylated Positions in MTG
	Displayed for each probe is chromosomal position (genome build 37), log2 fold change estimate for the case-control analysis (logFC), accompanying p-values, Benjamini-Hochberg FDR adjusted values and t-statistics, UCSC gene annotation of closest transcription start site (TSS; column: ID) and the correspoding distance to the TSS (Distance TSS), Illumina gene annotation (UCSC Annotation) and genomic…
														Control		AD
	Rank	Probe ID	Position	logFC	P-value	FDR	t	ID	Distance TSS	UCSC Annotation	Region	GREAT Annotation		Average 5mC (%)	Standard Deviation	Average 5mC (%)	Standard Deviation
	1	cg05417607	chr 17: 1373605	0.0514542	1.1496e-05	0.218718	4.38693	CRK	-14044	MYO1C;MYO1C;MYO1C	Body;Body;Body	CRK (-14045)	MYO1C (+22395)	71.3526	5.69085	76.9812	6.41214
	2	cg27064178	chr 22: 50178220	-0.0743668	0.000104091	0.391125	-3.88085	LOC90834	-4262	BRD1	Body	BRD1 (+40231)		61.9018	7.73143	56.6367	9.98617
	3	cg13285174	chr 20: 3052221	-0.0590717	9.01274e-05	0.38435	-3.91574	OXT	-44	OXT	TSS200	OXT (-44)		74.6055	6.16245	67.6631	9.08032
	4	cg22122808	chr 17: 61511683	-0.0533239	7.68515e-05	0.382584	-3.95401	CYB561	3627	CYB561;CYB561;CYB561	3'UTR;3'UTR;3'UTR	CYB561 (+11861)	TANC2 (+424786)	30.6605	6.36632	25.5832	5.58817
	5	cg26332535	chr 17: 78803184	-0.0467006	2.29453e-05	0.26765	-4.23412	RPTOR	-120051	RPTOR;RPTOR	Body;Body	CHMP6 (-162456)	RPTOR (+284560)	79.5215	5.11645	75.876	5.36104
	6	cg24721647	chr 4: 185726836	-0.043694	1.07179e-05	0.218718	-4.40216	ACSL1	106	ACSL1	5'UTR	MLF1IP (-71551)	ACSL1 (+20378)	32.3205	6.78934	28.626	5.84976
	7	cg18517898	chr 19: 36435675	-0.0439659	7.02313e-05	0.366497	-3.9755	LRFN3	7654	LRFN3	Body	SDHAF1 (-50414)	LRFN3 (+7654)	84.5404	3.85649	81.4748	6.15585
	8	cg21164050	chr 13: 27757411	-0.0410047	1.18591e-05	0.218718	-4.38016	USP12	-11378			RPL21 (-68280)	USP12 (-11379)	54.4253	4.35454	51.2845	5.26727
	9	cg08752433	chr 12: 111016566	0.0405916	6.2398e-06	0.154669	4.5181	PPTC7	4498	PPTC7	Body	PPTC7 (+4497)	RAD9B (+76562)	59.1632	4.66385	63.2287	4.54124
	10	cg08169830	chr 7: 97822374	-0.0452206	0.000124897	0.401977	-3.83631	BHLHA15	-18403	LMTK2	Body	BHLHA15 (-19193)	LMTK2 (+86178)	67.2551	5.08608	63.8037	6.34912
	11	cg11823178	chr 8: 41519399	0.0513167	0.000217642	0.459132	3.69761	MIR486	-1373	ANK1;ANK1;ANK1;ANK1;ANK1;ANK1;ANK1;MIR486;ANK1	Body;Body;Body;Body;Body;Body;Body;TSS1500;Body	NKX6-3 (-14525)	ANK1 (+234880)	78.2332	5.68663	83.3098	6.05947
	12	cg10433043	chr 6: 152432725	-0.041131	3.21564e-05	0.293913	-4.15763	SYNE1	73788			ESR1 (+304272)	SYNE1 (+525808)	47.892	4.78929	44.0352	4.51271
	13	cg04819081	chr 2: 24026544	0.042727	9.45798e-05	0.391125	3.90409	ATAD2B	28928	ATAD2B	Body	ATAD2B (+123391)		59.0505	5.03021	63.8295	4.30847
	14	cg18419358	chr 6: 158384009	-0.0392547	5.21942e-07	0.068354	-5.01807	SYNJ2	-18878			SYNJ2 (-18878)	SNX9 (+139716)	57.1735	2.79952	53.0067	4.0675
	15	cg00857907	chr 2: 202896898	-0.0403096	3.91686e-05	0.337142	-4.11233	FZD7	-2411			FZD7 (-2411)		60.525	4.74197	56.0378	5.60585
	16	cg24616382	chr 7: 99767035	0.040135	2.6726e-05	0.278935	4.19971	GAL3ST4	-662	GAL3ST4	TSS1500	GAL3ST4 (-663)		56.2886	4.12162	60.5679	4.14278
	17	cg25775386	chr 19: 17932001	0.0446101	0.000171677	0.431973	3.75742	INSL3	319	INSL3	Body	INSL3 (+318)		70.1573	4.67364	74.5324	5.40528
	18	cg08459186	chr 17: 71533337	-0.0474679	0.000270557	0.485534	-3.64197	SDK2	-99376	SDK2	Body	CDC42EP4 (-225195)	SDK2 (+106889)	39.9576	6.68533	35.895	6.73357
	19	cg15348679	chr 21: 45626491	0.0393545	4.23161e-05	0.337142	4.09446	ICOSLG	34343			ICOSLG (+34342)	C21orf33 (+72998)	74.8982	3.24303	78.111	4.98835
	20	cg05306310	chr 21: 43186286	0.0400155	7.75237e-05	0.382584	3.95193	RIPK4	963	RIPK4	Body	RIPK4 (+962)		42.7923	4.7353	45.936	5.03078
	21	cg27630153	chr 16: 88845038	0.0551173	0.00042381	0.564431	3.5248	PIEZO1	6334	FAM38A	Body	PIEZO1 (+6333)	CTU2 (+72148)	68.13	8.4228	73.2647	7.65144
	22	cg08597839	chr 1: 29461008	0.0577156	0.00047534	0.564431	3.49428	TMEM200B	-10587			TMEM200B (-10588)	SRSF4 (+47628)	44.6517	6.48754	50.6501	7.91167
	23	cg22211672	chr 15: 74610366	0.0371809	6.894e-07	0.068354	4.96433	CCDC33	-533	CCDC33;CCDC33	Body;TSS1500	CYP11A1 (+49714)	CCDC33 (+81700)	31.4124	3.64576	34.2216	4.1882
	24	cg15003570	chr 10: 133529939	-0.0445598	0.000332912	0.530483	-3.58824	FLJ46300	92596			PPP2R2D (-218020)		68.7494	5.52644	64.8883	6.2821
	25	cg00539564	chr 22: 43254081	0.0644843	0.000536858	0.566273	3.46166	ARFGAP3	-673	ARFGAP3;ARFGAP3	TSS1500;TSS1500	ARFGAP3 (-674)		59.6796	8.11956	67.03	8.08014
	26	cg00422578	chr 11: 119968331	0.0366358	2.42407e-07	0.068354	5.16347	TRIM29	24370			PVRL1 (-368897)	TRIM29 (+40531)	68.7616	3.44972	72.3316	2.77076
	27	cg24919753	chr 10: 121138105	-0.0438827	0.000328146	0.528773	-3.592	MIR4681	622	GRK5	Body	RGS10 (+164116)	GRK5 (+170909)	41.6248	5.19461	38.4969	6.61412
	28	cg26733846	chr 6: 112824384	0.0380463	9.93453e-05	0.391125	3.89219	RFPL4B	153474			RFPL4B (+155853)		32.8978	5.13042	37.4106	5.27388
	29	cg00682103	chr 8: 141554380	-0.0392642	0.000191372	0.439333	-3.73014	DQ574852	-18505	EIF2C2;EIF2C2	Body;Body	CHRAC1 (+32984)	EIF2C2 (+91265)	82.2007	3.30168	78.3037	5.43792
	30	cg13523576	chr 8: 21909636	0.038973	0.000182249	0.436232	3.74243	EPB49	-1444	EPB49	TSS1500	EPB49 (-2691)		55.7789	4.53825	59.834	3.92781
	31	cg14426449	chr 14: 103777785	-0.0366128	6.50999e-05	0.356555	-3.99352	JA429130	11231			EIF5 (-22707)	TNFAIP2 (+185122)	44.1008	5.62374	41.3093	6.21725
	32	cg13553936	chr 13: 114202067	-0.0359076	2.26759e-05	0.26765	-4.23677	TFDP1	-36935	TMCO3	Body	TFDP1 (-36988)	TMCO3 (+56760)	63.0106	3.82898	60.25	4.10122
	33	cg14871225	chr 5: 139040820	-0.0380122	0.00015347	0.419767	-3.78539	CXXC5	12303	CXXC5	5'UTR	PSD2 (-134585)	CXXC5 (+12520)	18.9105	4.81829	15.0118	3.62195
	34	cg24172175	chr 19: 48988470	-0.0360459	5.24906e-05	0.352322	-4.04425	BC042033	-15520			CYTH2 (+16006)	LMTK3 (+27975)	76.1109	3.6916	73.2652	4.24571
	35	cg23622616	chr 2: 236444259	-0.0388011	0.000261777	0.474169	-3.65045	AGAP1	41527	AGAP1;AGAP1	Body;Body	AGAP1 (+41527)	GBX2 (+632392)	43.2573	6.327	40.6388	6.67674
	36	cg05100432	chr 14: 104889005	-0.0453268	0.000583629	0.572506	-3.43911	AX746996	89193			C14orf180 (-157050)	KIF26A (+283946)	69.1234	6.74712	66.3585	7.14332
	37	cg10857341	chr 2: 161952702	-0.0379622	0.000228471	0.460556	-3.68526	TANK	-40763			RBMS1 (-602385)	TANK (-40763)	62.2805	4.75245	59.0142	5.22353
	38	cg10712934	chr 10: 686201	-0.0364394	0.000171947	0.431973	-3.75702	DL489896	1541	DIP2C	Body	DIP2C (+49406)	ZMYND11 (+460268)	73.0093	3.75107	70.8609	6.21055
	39	cg08993283	chr 7: 17585471	0.0365109	0.000182588	0.436232	3.74196	Mir_384	-12211			AHR (+247196)	SNX13 (+394659)	62.1366	5.17188	65.9557	4.39944
	40	cg11239720	chr 4: 152967415	-0.0443871	0.000639876	0.583433	-3.41412	BC040914	-54554			PET112 (-285241)	FBXW7 (+488769)	51.0709	5.13922	46.2076	6.31858
	41	cg11684897	chr 17: 2951666	0.044304	0.000635306	0.581899	3.41608	OR1D5	15235			OR1D5 (+15234)	RAP1GAP2 (+251935)	33.5159	4.75199	38.2217	5.88376
	42	cg01234610	chr 17: 48912265	-0.0418783	0.000573172	0.572506	-3.444	WFIKKN2	255	WFIKKN2	TSS1500	WFIKKN2 (-339)		35.8642	5.69821	33.5291	7.13377
	43	cg09066883	chr 7: 157932951	-0.0397071	0.000472176	0.564431	-3.49606	DQ583756	-70752	PTPRN2;PTPRN2;PTPRN2	Body;Body;Body	PTPRN2 (+447530)	DNAJB6 (+803242)	59.5654	5.56283	56.0799	5.80177
	44	cg02481714	chr 22: 40439396	-0.0344093	4.18454e-05	0.337142	-4.09705	TNRC6B	-1424	TNRC6B	TSS1500	TNRC6B (-134532)	GRAP2 (+142311)	39.1317	4.47869	35.4497	3.84642
	45	cg21179912	chr 9: 2024387	0.0365486	0.000238075	0.461737	3.67476	SMARCA2	9046	SMARCA2;SMARCA2	5'UTR;5'UTR	VLDLR (-597405)	SMARCA2 (+9046)	68.106	4.74411	72.0636	3.8016
	46	cg07871971	chr 17: 40839766	0.0340851	2.17963e-05	0.26765	4.24565	CNTNAP1	5135	CNTNAP1	Body	CNTNAP1 (+5135)	EZH1 (+57304)	74.0701	4.56716	78.311	3.46829
	47	cg05270236	chr 6: 158269807	0.0377582	0.000385738	0.556305	3.54965	SNX9	25514	SNX9	Body	SYNJ2 (-133080)	SNX9 (+25514)	58.6492	4.78168	62.9982	4.60658
	48	cg04014586	chr 1: 245704710	0.0347337	0.000106591	0.391125	3.87508	KIF26B	30407	KIF26B	Body	KIF26B (+386424)	SMYD3 (+965933)	66.66	5.10713	70.2867	4.34204
	49	cg06853339	chr 17: 76117687	-0.0576596	0.000978482	0.627222	-3.29664	TMC6	1143	TMC6;TMC6	Body;Body	TMC6 (+7173)	TNRC6C (+117370)	69.5771	7.12939	63.8829	8.60133
	50	cg14364186	chr 9: 135619500	-0.0449447	0.000828563	0.619158	-3.34307	DDX31	-73712	C9orf98	Body	DDX31 (-73713)	AK8 (+134697)	48.1617	5.58929	44.7612	6.23448
	51	cg00828618	chr 19: 7754029	-0.0371441	0.000443686	0.564431	-3.51264	TRAPPC5	6890	FCER2	3'UTR	TRAPPC5 (+8323)	FCER2 (+13002)	58.2031	3.65012	54.7895	5.33623
	52	cg26568226	chr 15: 22913326	0.034412	0.000131905	0.404791	3.82287	CYFIP1	-8092	CYFIP1	5'UTR	CYFIP1 (+20643)	NIPA2 (+121100)	79.6654	3.67438	82.8106	4.44872
	53	cg18448746	chr 17: 27039132	-0.033534	4.79596e-05	0.345832	-4.06535	PROCA1	-260	PROCA1	TSS1500	PROCA1 (-261)		54.4689	5.47966	50.5125	4.67858
	54	cg15262954	chr 20: 62198872	-0.0657817	0.00109015	0.634339	-3.26616	PRIC285	235	PRIC285;PRIC285	Body;1stExon	SRMS (-20016)	PRIC285 (+6719)	33.633	13.7248	26.4865	9.16037
	55	cg21597025	chr 3: 142837564	0.0414274	0.000768717	0.612929	3.36382	CHST2	-1053	CHST2	TSS1500	CHST2 (-1053)		62.3909	5.69606	66.8563	4.8349
	56	cg22101190	chr 17: 77896096	-0.0400186	0.000670074	0.590996	-3.40154	BC044939	2941			CBX4 (-82884)	TBC1D16 (+113550)	49.1519	5.6841	45.0112	5.91793
	57	cg07209244	chr 5: 172116212	0.03617	0.000423351	0.564431	3.52508	NEURL1B	47937	NEURL1B	3'UTR	NEURL1B (+47937)	DUSP1 (+81990)	45.2658	5.18039	48.3029	4.88819
	58	cg18928017	chr 15: 84115529	-0.0361603	0.000421375	0.564431	-3.52632	SH3GL3	-561	SH3GL3;SH3GL3	TSS1500;TSS1500	SH3GL3 (-561)		43.9869	4.44928	42.0233	6.88549
	59	cg12008047	chr 19: 18497143	0.0412818	0.000807984	0.619158	3.35005	GDF15	176	GDF15	1stExon	GDF15 (+176)		59.3481	5.71423	62.8474	4.85165
	60	cg00333583	chr 15: 85589274	0.0425837	0.000883801	0.621916	3.32512	PDE8A	-16453	PDE8A;PDE8A	Body;Body	AKAP13 (-334596)	PDE8A (+64070)	47.2398	5.96597	51.0378	5.51601
	61	cg12163800	chr 17: 74475355	0.039979	0.000737111	0.607847	3.37539	RHBDF2	2272	RHBDF2;RHBDF2	Body;Body	RHBDF2 (+8635)	AANAT (+11726)	79.0457	5.52199	83.3703	4.37018
	62	cg07018404	chr 5: 126193470	-0.0376022	0.000554615	0.570305	-3.45289	AX748201	6345			LMNB1 (+81156)	MARCH3 (+172969)	50.92	5.75268	47.9821	4.59828
	63	cg03131724	chr 11: 58731433	0.0496022	0.00106135	0.634339	3.27374	AB231722	-14898			FAM111B (-143224)	GLYATL1 (+20712)	40.381	6.07595	45.5884	6.26418
	64	cg09545579	chr 17: 79377548	-0.058464	0.00115336	0.644257	-3.25017	MIR4740	-2970	BAHCC1	Body	BAHCC1 (+4009)	ACTG1 (+102343)	33.105	8.96039	28.7417	8.34145
	65	cg06553792	chr 17: 71128239	0.0332962	9.73561e-05	0.391125	3.89709	SSTR2	-32920			SLC39A11 (-39387)	SSTR2 (-32920)	61.094	3.45273	64.3538	4.88102
	66	cg05951817	chr 17: 28562142	0.0354522	0.000416689	0.564431	3.52928	SLC6A4	812	SLC6A4	5'UTR	SLC6A4 (+811)		58.6161	6.09992	62.7993	6.13802
	67	cg15807455	chr 10: 114912080	-0.046315	0.00103489	0.631568	-3.28087	Mir_652	-2154	TCF7L2;TCF7L2;TCF7L2;TCF7L2;TCF7L2;TCF7L2	Body;Body;Body;Body;Body;Body	HABP2 (-400697)	TCF7L2 (+202072)	64.425	6.97879	61.4759	8.14995
	68	cg23184226	chr 7: 97880563	0.0351765	0.000394417	0.560666	3.54379	TECPR1	905	TECPR1	5'UTR	TECPR1 (+904)		30.0256	4.3601	34.4312	5.79576
	69	cg02647998	chr 3: 12201096	-0.0379658	0.00062613	0.577496	-3.42004	TIMP4	-245	TIMP4;SYN2;SYN2	TSS1500;Body;Body	TIMP4 (-246)		48.2763	6.23037	45.9347	7.15014
	70	cg09685472	chr 16: 81527427	0.0340945	0.00023332	0.461737	3.67991	CMIP	-1526	CMIP	Body	PLCG2 (-285471)	CMIP (+48653)	60.1238	3.87565	62.5327	4.81394
	71	cg18361024	chr 5: 180661392	-0.0415956	0.00091319	0.621916	-3.31599	TRIM41	1002	TRIM41;TRIM41	Body;Body	AX748230 (-3708)		65.4145	7.05307	62.8499	6.22009
	72	cg16908552	chr 1: 231174153	0.0363575	0.000554098	0.570305	3.45314	FAM89A	1842	FAM89A	Body	TRIM67 (-124520)	ARV1 (+59331)	46.1243	5.41393	50.3143	3.80762
	73	cg26565893	chr 17: 73501109	0.0431912	0.00103712	0.631568	3.28026	CASKIN2	4849	CASKIN2;CASKIN2	Body;Body	CASKIN2 (+10517)	KIAA0195 (+48446)	68.3634	7.36254	73.5282	5.5183
	74	cg01025302	chr 5: 3213214	0.0349061	0.000448946	0.564431	3.5095	LOC285577	322994			IRX1 (-382953)	C5orf38 (+460953)	72.0632	4.70348	75.7265	3.75877
	75	cg02841912	chr 6: 152955983	-0.032504	7.00566e-05	0.366497	-3.97609	SYNE1	1957	SYNE1;SYNE1	5'UTR;5'UTR	SYNE1 (+2550)	ESR1 (+827530)	51.5356	4.30879	48.4508	4.23895
	76	cg16501237	chr 10: 99081016	-0.0429001	0.00104051	0.631568	-3.27934	FRAT1	1995	FRAT1;FRAT1	1stExon;3'UTR	FRAT1 (+1995)	FRAT2 (+13441)	16.8568	6.96041	13.3873	4.79352
	77	cg10656128	chr 15: 29261921	-0.0337742	0.000264863	0.477476	-3.64744	APBA2	48079	APBA2;APBA2	5'UTR;5'UTR	APBA2 (+48079)	NDNL2 (+300098)	50.6599	5.67421	48.8694	6.4373
	78	cg05749855	chr 16: 89472771	0.0469228	0.00119279	0.649809	3.2406	ANKRD11	12005	ANKRD11	5'UTR	ANKRD11 (+84197)	ZNF778 (+188661)	69.461	7.86128	75.1622	5.96805
	79	cg02528112	chr 7: 156754734	-0.0371111	0.000707131	0.596478	-3.3868	NOM1	-110	NOM1	Body	NOM1 (+12318)	MNX1 (+48612)	69.6567	4.61537	66.6645	5.33852
	80	cg14815743	chr 19: 47354685	0.0398606	0.000922795	0.621916	3.31307	AP2S1	-482	AP2S1;AP2S1	TSS1500;TSS1500	AP2S1 (-483)		65.0078	4.75397	68.6389	5.06633
	81	cg16803678	chr 3: 133941748	0.0370409	0.000711751	0.596788	3.38501	RYK	27838	RYK;RYK	Body;Body	SLCO2A1 (-192829)	RYK (+27837)	44.7916	4.57475	48.7508	4.71104
	82	cg11641222	chr 8: 121566699	-0.0316835	1.25716e-06	0.0830984	-4.84641	MTBP	109034	SNTB1	Body	MTBP (+109034)	SNTB1 (+257609)	82.9567	3.54287	80.3594	4.20876
	83	cg20580578	chr 7: 75189143	0.0326621	0.000170771	0.431973	3.75874	PMS2P3	-31690	HIP1	Body	POM121C (-73576)	HIP1 (+179139)	59.5732	3.7926	63.6805	5.3113
	84	cg14909614	chr 6: 35454069	0.041236	0.00107549	0.634339	3.27	TEAD3	-5050	TEAD3	Body	TEAD3 (+10791)	RPL10A (+17892)	67.761	5.52768	71.8245	5.23551
	85	cg05207107	chr 12: 56495114	0.0364634	0.000766717	0.612929	3.36454	PA2G4	-2988	ERBB3	Body	PA2G4 (-2988)		62.8854	5.22794	66.6533	4.4361
	86	cg02750065	chr 12: 117155382	-0.0329352	0.000243936	0.461737	-3.66854	C12orf49	20461	C12orf49	3'UTR	C12orf49 (+20460)	MAP1LC3B2 (+158197)	32.5338	4.57352	30.1893	5.25832
	87	cg12523424	chr 7: 2184809	-0.0329287	0.000240386	0.461737	-3.67229	MAD1L1	70835	MAD1L1;MAD1L1;MAD1L1	Body;Body;Body	MAD1L1 (+87773)	ELFN1 (+436012)	77.5223	3.87752	75.4521	5.16295
	88	cg19572076	chr 2: 118621741	0.0317634	6.19725e-05	0.356555	4.00517	DDX18	49487			INSIG2 (-224308)	DDX18 (+49487)	69.6729	4.57788	73.2302	4.10522
	89	cg06463221	chr 17: 75212862	0.0346965	0.000558771	0.570305	3.45088	SEC14L1	7935	SEC14L1;SEC14L1;SEC14L1;SEC14L1;SEC14L1	3'UTR;3'UTR;3'UTR;3'UTR;3'UTR	SEPT9 (-64629)	SEC14L1 (+75858)	40.9984	3.78037	45.3356	4.83182
	90	cg26869615	chr 11: 20044639	-0.0319524	0.000101838	0.391125	-3.88617	NAV2	4	NAV2;NAV2;NAV2;NAV2;NAV2	Body;Body;5'UTR;1stExon;Body	DBX1 (+137230)	NAV2 (+309759)	59.1086	3.52566	56.3021	3.80793
	91	cg02332696	chr 10: 21783091	-0.0374887	0.000918656	0.621916	-3.31432	MIR1915	2479			NEBL (-596561)	C10orf140 (+23659)	32.1902	5.9603	28.0576	5.31941
	92	cg02072495	chr 15: 60689285	-0.0339841	0.000510167	0.566273	-3.47536	ANXA2	900	ANXA2;ANXA2;ANXA2;ANXA2	5'UTR;5'UTR;Body;5'UTR	ANXA2 (+899)		45.3558	6.2734	40.9238	6.13401
	93	cg16905506	chr 1: 155035748	-0.0310363	2.2738e-06	0.112724	-4.72743	EFNA3	-464	EFNA4;EFNA4;EFNA4	TSS1500;TSS1500;TSS1500	EFNA3 (-15599)	ADAM15 (+11987)	35.2565	3.61828	31.8114	3.28269
	94	cg24811290	chr 4: 159092553	-0.0318586	0.000121017	0.401977	-3.84406	AK126266	638	FAM198B;FAM198B;FAM198B	5'UTR;5'UTR;5'UTR	FAM198B (+1648)	GRIA2 (+950818)	20.7254	3.88872	17.3621	3.53646
	95	cg05104283	chr 17: 75463860	-0.038263	0.000998943	0.627527	-3.29082	41161	-7464	SEPT9;SEPT9;SEPT9;SEPT9;SEPT9;SEPT9	Body;5'UTR;Body;Body;Body;Body	TNRC6C (-536457)	SEPT9 (+186369)	73.5216	4.13114	70.3211	6.69129
	96	cg06439547	chr 1: 230779251	0.0343056	0.000569725	0.572381	3.44563	COG2	1050	COG2;COG2	Body;Body	COG2 (+1050)	AGT (+71084)	66.2295	5.39846	70.2881	3.92276
	97	cg03119897	chr 1: 204948629	-0.034965	0.00067368	0.590996	-3.40007	NFASC	-2296	NFASC;NFASC;NFASC;NFASC	Body;Body;Body;Body	CNTN2 (-63710)	NFASC (+150848)	74.7921	4.96732	72.1502	5.71476
	98	cg17067544	chr 7: 22765321	0.0400193	0.00112751	0.641562	3.25661	IL6	-1444	IL6	TSS1500	IL6 (-1444)		62.8593	5.08938	66.7291	5.39494
	99	cg08310581	chr 2: 131797438	-0.0370213	0.000921397	0.621916	-3.31349	ARHGEF4	337	ARHGEF4;ARHGEF4	Body;Body	PLEKHB2 (-64981)	ARHGEF4 (+124653)	29.4268	5.64414	26.8319	5.54292
	100	cg26436136	chr 3: 182970675	0.0325423	0.000288737	0.497501	3.6252	B3GNT5	-356	MCF2L2;B3GNT5	Body;TSS1500	B3GNT5 (-356)		64.6689	3.96527	67.3305	4.38444
	101	cg03198010	chr 13: 113274482	-0.0480086	0.00150712	0.679232	-3.17331	C13orf35	-26875			ATP11A (-70160)	TUBGCP3 (-32002)	54.8368	7.27894	51.3301	8.34269
	102	cg00115178	chr 10: 12648176	-0.0334017	0.000472458	0.564431	-3.4959	MIR4480	27425	CAMK1D;CAMK1D	Body;Body	CAMK1D (+256594)	CCDC3 (+395527)	15.5328	4.78491	12.388	3.70086
	103	cg15712323	chr 19: 11565399	0.0315219	0.000111377	0.39185	3.86437	PRKCSH	18834	ELAVL3;ELAVL3	Body;Body	PRKCSH (+19131)	ELAVL3 (+26403)	77.445	3.86148	80.9875	2.99649
	104	cg06896207	chr 19: 2095364	-0.0307389	2.9806e-06	0.118211	-4.67215	MOB3A	905	MOBKL2A	5'UTR	IZUMO4 (-1503)	MOB3A (+904)	17.5228	3.50483	14.4789	2.13451
	105	cg26975848	chr 2: 104961016	-0.0342113	0.000612942	0.572506	-3.42582	LOC100287010	63774			POU3F3 (-510952)		56.8799	5.36911	53.7571	3.71558
	106	cg13768347	chr 11: 1311540	-0.0311632	8.43844e-05	0.38435	-3.93159	TOLLIP	12433	TOLLIP	Body	TOLLIP (+19351)	MUC5B (+67246)	84.9845	3.46998	83.0088	4.89014
	107	cg05396243	chr 17: 10707547	-0.0332508	0.000497333	0.566273	-3.48219	LOC100289255	-131			TMEM220 (-73902)	PIRT (+33870)	63.8817	4.78118	61.7493	6.49751
	108	cg23111196	chr 5: 60603263	0.03234	0.000347739	0.533694	3.57687	ZSWIM6	-24836			C5orf43 (-144962)	ZSWIM6 (-24836)	63.6616	4.89742	66.945	3.21769
	109	cg22249752	chr 12: 133186738	-0.0336134	0.000574908	0.572506	-3.44318	LOC100507055	299			GALNT9 (-280834)	P2RX2 (-8664)	67.7944	4.44221	64.138	4.08506
	110	cg17247149	chr 3: 66455638	-0.0388658	0.00121966	0.655531	-3.23424	LRIG1	-804	LRIG1	Body	LRIG1 (+95206)	SLC25A26 (+336354)	69.2903	5.38979	66.1817	5.52704
	111	cg12262181	chr 10: 114910849	-0.0359877	0.000941534	0.626034	-3.30744	Mir_652	-3385	TCF7L2;TCF7L2;TCF7L2;TCF7L2;TCF7L2;TCF7L2	Body;Body;Body;Body;Body;Body	HABP2 (-401928)	TCF7L2 (+200841)	56.0125	5.42476	53.8663	7.30026
	112	cg05308639	chr 19: 1525316	-0.048304	0.00165098	0.686761	-3.14675	PLK5	359	PLK5P	Body	PLK5 (+1244)	MEX3D (+42740)	45.0543	7.93135	40.3985	6.76095
	113	cg16624482	chr 21: 43548126	0.033314	0.000600313	0.572506	3.43147	UMODL1	345	UMODL1;UMODL1	Body;Body	ABCG1 (-91140)	UMODL1 (+56701)	76.5718	4.71832	79.3211	4.0001
	114	cg20924735	chr 2: 202565040	-0.0319167	0.000316212	0.518797	-3.60164	MPP4	-1623	ALS2	3'UTR	MPP4 (-1624)		54.7378	3.8262	53.0088	5.79067
	115	cg01287730	chr 2: 109622531	-0.0348353	0.000859751	0.621916	-3.33281	EDAR	-16703			SH3RF3 (-123465)	EDAR (-16704)	52.8108	6.41368	50.0366	5.97885
	116	cg25312880	chr 19: 5210847	0.0305573	4.59258e-05	0.344826	4.07545	PTPRS	75398	PTPRS;PTPRS;PTPRS;PTPRS	Body;Body;Body;Body	PTPRS (+129966)	KDM4B (+241724)	76.5608	3.34256	79.3723	3.32796
	117	cg18137414	chr 22: 42313943	0.0307923	0.000117949	0.401502	3.85035	SHISA8	-3272			SHISA8 (-3273)		59.6891	4.17012	62.3712	4.53556
	118	cg00420742	chr 19: 54313004	0.0319951	0.000416923	0.564431	3.52913	NLRP12	-1045	NLRP12;NLRP12	Body;TSS1500	NLRP12 (+14643)	DPRX (+177695)	63.2036	4.10685	66.2821	4.12596
	119	cg08241939	chr 1: 204700816	0.0313539	0.000273343	0.488323	3.63934	5S_rRNA	-24258			NFASC (-96965)	LRRN2 (-46220)	58.9844	4.54033	61.7113	4.54485
	120	cg13136596	chr 17: 55344950	-0.0363295	0.00113267	0.642007	-3.25531	MSI2	5475	MSI2;MSI2	Body;Body	MSI2 (+11020)	MRPS23 (+582482)	66.0579	5.85324	62.9185	5.87495
	121	cg20544516	chr 17: 17717183	0.0344905	0.000912194	0.621916	3.3163	MIR33B	62	MIR33B;SREBF1;SREBF1	Body;Body;Body	SREBF1 (+23141)	RAI1 (+132397)	49.6028	7.15185	53.8087	6.54148
	122	cg06345462	chr 16: 13263104	0.0323782	0.000532175	0.566273	3.46402	SHISA9	267628	SHISA9	Body	ERCC4 (-750909)	SHISA9 (+267628)	65.8041	4.35945	69.6885	4.21351
	123	cg02082462	chr 19: 848001	-0.0332637	0.00070819	0.596478	-3.38639	ELANE	-4289	PRTN3	3'UTR	ELANE (-4289)		28.3517	3.89276	25.3871	4.26908
	124	cg08056778	chr 4: 38139045	0.03069	0.000149595	0.419767	3.79174	TBC1D1	17471	TBC1D1	3'UTR	KLF3 (-526744)	PTTG2 (+176990)	81.2743	3.8969	84.4688	2.91832
	125	cg04289575	chr 15: 73975176	0.0300217	5.32392e-07	0.068354	5.01426	CD276	-1445	CD276;CD276	TSS1500;TSS1500	CD276 (-1445)		39.2798	3.0686	42.6445	3.83796
	126	cg14951497	chr 2: 191875807	0.0369027	0.00126041	0.660662	3.22484	STAT1	2597	STAT1;STAT1	5'UTR;5'UTR	STAT1 (+3168)	GLS (+130261)	54.6248	6.00063	59.0959	4.06566
	127	cg02840179	chr 8: 1534376	0.0331102	0.000690668	0.594451	3.39326	AK093412	36207	DLGAP2	Body	CLN8 (-177493)	DLGAP2 (+84808)	67.9772	5.61197	70.6955	4.88544
	128	cg09663655	chr 1: 2999728	-0.0537587	0.00198866	0.708241	-3.09192	PRDM16	13987	PRDM16;PRDM16	Body;Body	ARHGEF16 (-371418)	PRDM16 (+13987)	73.3956	6.90534	68.5358	7.91885
	129	cg22164577	chr 2: 170685661	-0.0344889	0.00099053	0.627527	-3.2932	UBR3	1644	UBR3	Body	METTL5 (-4309)	UBR3 (+1644)	53.2227	4.74208	51.0885	5.65588
	130	cg19592472	chr 20: 3052274	-0.0462492	0.0018459	0.69326	-3.11397	OXT	9	OXT;OXT	1stExon;5'UTR	OXT (+9)		61.9589	6.0604	55.9316	8.94108
	131	cg03695103	chr 11: 1471594	-0.0348403	0.00105499	0.633955	-3.27544	BRSK2	-222	BRSK2	Body	MOB2 (+30520)	BRSK2 (+60466)	77.6954	4.78942	75.5133	5.42581
	132	cg20445053	chr 2: 169440359	-0.0300876	5.37404e-05	0.352322	-4.03873	MIR4774	907	LASS6	Body	NOSTRIN (-218531)	CERS6 (+127525)	42.4349	4.60474	40.4242	4.74419
	133	cg02841651	chr 11: 133449527	0.0380465	0.00143749	0.669496	3.18702	OPCML	-47124			OPCML (-636491)	SPATA19 (+265864)	32.4782	6.2322	36.6092	4.10593
	134	cg16846503	chr 7: 101559200	-0.0306364	0.000231655	0.461737	-3.68173	CUX1	98319	CUX1;CUX1;CUX1	Body;Body;Body	SH2B2 (-369204)	CUX1 (+98319)	78.936	4.16124	76.8524	4.78698
	135	cg01644611	chr 20: 3052253	-0.0384668	0.00157584	0.686524	-3.16034	OXT	-12	OXT	TSS200	OXT (-12)		84.1474	3.87561	79.275	7.61163
	136	cg01513307	chr 6: 108479557	-0.0315947	0.000515656	0.566273	-3.47249	NR2E1	-7657			OSTM1 (-83617)	NR2E1 (-7657)	18.4317	4.35531	15.4538	3.54425
	137	cg20455854	chr 5: 139040849	-0.0517373	0.00207887	0.70868	-3.07873	CXXC5	12332	CXXC5	5'UTR	PSD2 (-134556)	CXXC5 (+12549)	20.5909	8.11453	15.3491	6.63808
	138	cg24769158	chr 12: 123351868	-0.0381718	0.00156931	0.686524	-3.16155	HIP1R	11396	VPS37B	Body	VPS37B (+28843)	HIP1R (+31830)	80.526	5.55776	78.1183	6.24505
	139	cg18395636	chr 11: 87908785	0.0307246	0.000329317	0.528773	3.59108	RAB38	-150	RAB38	TSS200	RAB38 (-151)		21.5891	3.4456	24.3101	3.78871
	140	cg09448088	chr 13: 113635690	0.0312865	0.000474076	0.564431	3.49499	MCF2L	1709	MCF2L;MCF2L	Body;Body	F7 (-124414)	MCF2L (+12156)	61.0952	4.04363	64.7597	4.60759
	141	cg09579932	chr 17: 3499165	0.0301099	0.000140829	0.407683	3.80671	TRPV1	-40	TRPV1;TRPV1;TRPV1	5'UTR;5'UTR;TSS200	TRPV3 (-37877)	TRPV1 (+1170)	56.2024	3.47038	58.7075	4.12373
	142	cg24125710	chr 3: 176414852	0.0335596	0.00101188	0.629014	3.2872	TBL1XR1	499414			TBL1XR1 (+500195)		51.2278	6.16536	53.9102	4.89929
	143	cg22082549	chr 3: 125687662	-0.0321229	0.000751833	0.612929	-3.36994	ROPN1B	-365	ROPN1B	TSS1500	ROPN1B (-365)		30.0562	3.94381	27.0062	3.73336
	144	cg05066959	chr 8: 41519308	0.0473678	0.00210681	0.709802	3.07475	MIR486	-1282	ANK1;ANK1;ANK1;ANK1;ANK1;ANK1;ANK1;MIR486;ANK1	Body;Body;Body;Body;Body;Body;Body;TSS1500;Body	NKX6-3 (-14434)	ANK1 (+234971)	74.9696	7.00155	79.8483	6.69415
	145	cg23378033	chr 12: 65672031	-0.031353	0.000557049	0.570305	-3.45171	MSRB3	-391	MSRB3;MSRB3	TSS1500;TSS1500	MSRB3 (-735)		31.8978	3.41096	28.6323	4.48399
	146	cg19885037	chr 3: 4762242	-0.0326213	0.000898079	0.621916	-3.32065	EGOT	-29774	ITPR1;ITPR1;ITPR1	Body;Body;Body	BHLHE40 (-258854)	ITPR1 (+227211)	44.7087	6.07734	42.4379	4.72261
	147	cg03179542	chr 7: 2647333	0.0322765	0.000844461	0.619158	3.33779	TTYH3	-24269	IQCE;IQCE	Body;Body	TTYH3 (-24269)	IQCE (+48702)	63.8191	5.70416	66.4166	4.96761
	148	cg14171369	chr 14: 75447688	0.0315672	0.000652245	0.589171	3.4089	EIF2B2	-21923			PGF (-25222)	EIF2B2 (-21923)	29.7506	5.02629	33.472	3.80816
	149	cg07159951	chr 1: 45983175	-0.0301362	0.00024827	0.461737	-3.66404	PRDX1	4435	PRDX1;PRDX1;PRDX1	Body;Body;Body	PRDX1 (+5386)	MMACHC (+17320)	64.0822	3.67801	61.6161	3.59858
	150	cg19309499	chr 8: 1150488	0.0369745	0.00163476	0.686524	3.14963	LOC286083	100339			C8orf42 (-655158)	DLGAP2 (-299080)	62.9343	6.45789	66.6209	5.74808
	151	cg19587968	chr 10: 134362785	-0.0326665	0.000965548	0.627222	-3.30038	INPP5A	11433	INPP5A	Body	INPP5A (+11433)	NKX6-2 (+236751)	78.287	3.90469	76.0897	5.20339
	152	cg07855465	chr 17: 79377665	-0.0444819	0.00215652	0.711545	-3.06778	MIR4740	-3087	BAHCC1	Body	BAHCC1 (+4126)	ACTG1 (+102226)	35.629	6.28199	32.7325	7.01669
	153	cg24420089	chr 11: 457304	-0.0306552	0.00051502	0.566273	-3.47282	PTDSS2	7025	PTDSS2	Body	PTDSS2 (+7025)	RNH1 (+49516)	58.8833	3.90637	56.5631	4.1865
	154	cg16674484	chr 5: 149887497	0.0301364	0.000346717	0.533694	3.57763	NDST1	-176	NDST1	TSS200	NDST1 (-176)		40.843	3.77016	42.9006	4.04351
	155	cg13596085	chr 2: 101008284	-0.0325159	0.000990446	0.627527	-3.29323	CHST10	25846			LONRF2 (-69090)	CHST10 (+25845)	56.2828	3.93674	53.6595	5.1386
	156	cg00764093	chr 7: 2851991	-0.0332162	0.00113663	0.642673	-3.25432	GNA12	2902	GNA12	Body	GNA12 (+31967)	AMZ1 (+132829)	60.1759	4.97122	57.4184	5.35414
	157	cg10057940	chr 10: 6805506	0.0366259	0.0017116	0.68697	3.13619	LOC100507127	-16053			PRKCQ (-183253)	SFMBT2 (+647941)	56.6572	5.47793	60.0659	4.54509
	158	cg06126864	chr 13: 110781645	-0.0319794	0.000897074	0.621916	-3.32096	COL4A1	177851			IRS2 (-342732)	COL4A1 (+177850)	73.9212	5.51091	71.7462	5.98952
	159	cg17781866	chr 4: 8372691	-0.0357988	0.00163829	0.686524	-3.149	AX746755	-13588	ACOX3;ACOX3	Body;Body	ACOX3 (+69760)	HTRA3 (+101203)	67.7971	4.57494	64.6084	4.92297
	160	cg09154880	chr 6: 32813715	0.0298186	0.000282187	0.497401	3.63113	PSMB8	-1003	TAP1;PSMB8	Body;TSS1500	PSMB8 (-1900)		69.1969	4.23765	72.4079	3.82231
	161	cg16153042	chr 6: 3282307	-0.0289282	1.59536e-05	0.243774	-4.31509	AX746991	6595	SLC22A23;SLC22A23	Body;Body	TUBB2B (-54340)	SLC22A23 (+174485)	26.7089	3.06124	24.6738	3.92976
	162	cg11846580	chr 16: 88590409	-0.0335316	0.00126965	0.660662	-3.22275	C16orf85	42716	ZFPM1	Body	ZC3H18 (-46379)	ZFPM1 (+70396)	25.2915	5.11678	22.4803	4.18978
	163	cg04029027	chr 7: 130125811	0.0335023	0.00126435	0.660662	3.22395	MEST	-204	MEST	TSS1500	CEP41 (-44958)	MEST (-6087)	59.9625	3.71354	62.4032	5.42055
	164	cg24907762	chr 10: 45497989	0.0302335	0.000460792	0.564431	3.50257	ZNF22	-827	ZNF22	5'UTR	C10orf25 (-1520)		65.8848	4.3415	69.2703	4.02324
	165	cg11784578	chr 4: 185361148	0.0298307	0.00032709	0.528773	3.59284	IRF2	34578	IRF2	5'UTR	ENPP6 (-222035)	IRF2 (+34577)	39.6605	2.90744	43.2326	4.64901
	166	cg07363977	chr 11: 976167	-0.0477321	0.0023563	0.713859	-3.04121	AP2A2	4106	AP2A2	Body	AP2A2 (+50359)	MUC6 (+60538)	66.5071	6.62288	62.7301	6.76664
	167	cg03783110	chr 17: 1463739	0.0320187	0.000957007	0.627222	3.30287	PITPNA	-644	PITPNA	Body	INPP5K (-43558)	PITPNA (+2370)	26.0386	4.86517	29.8486	3.95864
	168	cg15344192	chr 2: 121347210	-0.0328896	0.00113069	0.642007	-3.25581	LOC84931	-123285			GLI2 (-207656)	INHBB (+243492)	63.1991	4.12443	60.472	4.76579
	169	cg25751484	chr 19: 13915817	0.0393572	0.00202636	0.708524	3.08634	ZSWIM4	212	ZSWIM4	Body	NANOS3 (-72245)	ZSWIM4 (+9544)	49.0628	6.49507	53.0822	5.74341
	170	cg25609307	chr 11: 10550449	0.0287834	1.43939e-05	0.243536	4.33776	RNF141	12325	RNF141	Body	MTRNR2L8 (-19727)	RNF141 (+12324)	75.6509	3.67776	78.588	2.62816
	171	cg14437986	chr 6: 31691035	-0.0303311	0.000533077	0.566273	-3.46356	C6orf25	-85	C6orf25;C6orf25;C6orf25;C6orf25;C6orf25;C6orf25	TSS200;TSS200;TSS200;TSS200;TSS200;TSS200	LY6G6C (-1525)	C6orf25 (-85)	73.303	4.4557	69.8799	5.61554
	172	cg15276629	chr 18: 55114630	0.0293265	0.00019774	0.439333	3.72189	ONECUT2	11714	ONECUT2	Body	ONECUT2 (+11714)	FECH (+139338)	20.3357	3.96156	23.2776	4.77549
	173	cg03172212	chr 5: 175873937	0.0400146	0.00210829	0.709802	3.07454	FAF2	-1418	FAF2	TSS1500	FAF2 (-1418)		43.8804	5.89418	48.0231	4.98752
	174	cg23797020	chr 7: 2049956	-0.043264	0.00229754	0.712495	-3.0488	MAD1L1	-69771	MAD1L1;MAD1L1;MAD1L1	Body;Body;Body	MAD1L1 (+222626)	ELFN1 (+301159)	76.9073	5.37095	73.5896	7.56777
	175	cg02382400	chr 20: 3218487	0.0300845	0.000471863	0.564431	3.49624	SLC4A11	-114	SLC4A11	TSS200	SLC4A11 (+347)		62.8711	3.79424	65.9081	4.39787
	176	cg02225305	chr 11: 64594862	-0.0365097	0.00180317	0.68697	-3.12087	MEN1	-16096	CDC42BPG	Body	MEN1 (-16675)	CDC42BPG (+17178)	75.0719	4.43935	71.8341	5.4401
	177	cg03787603	chr 7: 101768610	-0.0332699	0.00135753	0.666224	-3.20353	SH2B2	-159794	CUX1;CUX1;CUX1	Body;Body;Body	SH2B2 (-159794)	CUX1 (+307729)	77.7622	3.4294	74.6475	7.01692
	178	cg14730223	chr 19: 18232604	0.0304668	0.000627656	0.57756	3.41937	IL12RB1	-22978	MAST3	Body	PIK3R2 (-31411)	MAST3 (+24002)	69.9073	4.76625	74.3862	5.37863
	179	cg25076408	chr 6: 158733152	-0.0289981	0.00013181	0.404791	-3.82305	TULP4	-539	TULP4;TULP4	TSS1500;TSS1500	TULP4 (-539)		61.3223	4.28702	59.293	5.28843
	180	cg25957092	chr 12: 123351126	-0.0318263	0.0010177	0.630654	-3.28559	HIP1R	10654	VPS37B	3'UTR	VPS37B (+29585)	HIP1R (+31088)	56.7604	3.9706	54.138	4.58532
	181	cg09030187	chr 1: 205263738	0.0301099	0.000530459	0.566273	3.46488	NUAK2	14122			NUAK2 (+27144)	TMCC2 (+66701)	55.1523	4.74589	57.6264	5.02738
	182	cg05038268	chr 11: 66885281	-0.0328016	0.00127256	0.660662	-3.2221	KDM2A	-1458	KDM2A;KDM2A	TSS1500;TSS1500	KDM2A (-1458)		17.8954	5.28647	14.6739	3.58998
	183	cg04517524	chr 14: 94405342	0.0410637	0.00227604	0.712495	3.05163	ASB2	1499	ASB2	Body	PRIMA1 (-150577)	ASB2 (+37733)	22.9304	6.04851	26.9763	5.88174
	184	cg01408010	chr 3: 150102779	-0.0294996	0.000354501	0.533694	-3.57183	TSC22D2	-24008			PFN2 (-414039)	TSC22D2 (-24008)	43.0539	3.9421	39.8385	4.98319
	185	cg13927769	chr 9: 101740711	-0.0321087	0.00117368	0.646192	-3.2452	COL15A1	34574	COL15A1	Body	TGFBR1 (-126700)	COL15A1 (+34574)	32.7745	4.80366	30.146	4.78794
	186	cg10959242	chr 4: 2392280	-0.031078	0.000926758	0.621916	-3.31187	ZFYVE28	-25676	ZFYVE28	Body	MXD4 (-128542)	ZFYVE28 (+28089)	63.7668	4.23165	61.6852	5.1938
	187	cg14166284	chr 1: 221055719	0.0344749	0.00171804	0.68697	3.13509	HLX	2977	HLX	Body	HLX (+2977)	DUSP10 (+859796)	67.9767	6.17185	71.2215	7.21133
	188	cg06675144	chr 5: 127552620	-0.0284651	4.2504e-05	0.337142	-4.09343	SLC12A2	58941			SLC12A2 (+133138)	FBN2 (+321114)	49.0684	3.93314	46.323	3.77889
	189	cg05481579	chr 17: 79030796	0.0284022	2.62191e-05	0.278935	4.20404	BAIAP2	21850	BAIAP2;BAIAP2;BAIAP2;BAIAP2	Body;Body;Body;Body	BAIAP2 (+21850)	AATK (+109075)	60.4005	3.84335	63.5908	3.12283
	190	cg26716103	chr 10: 81020830	-0.0287228	0.000133705	0.404791	-3.81953	ZMIZ1	-16107	ZMIZ1	Body	PPIF (-86389)	ZMIZ1 (+192039)	38.1208	2.9691	36.0432	4.49813
	191	cg14475840	chr 9: 103191817	0.0294901	0.000470457	0.564431	3.49704	C9orf30	22	C9orf30	5'UTR	TEX10 (-76559)	C9orf30-TMEFF1 (-12370)	21.2309	3.55606	24.4216	4.93758
	192	cg13725599	chr 20: 3052262	-0.0323412	0.00134773	0.665887	-3.20562	OXT	-3	OXT	TSS200	OXT (-3)		86.2687	3.27691	81.925	6.649
	193	cg03117949	chr 21: 30396586	-0.0285248	0.000109108	0.391125	-3.86939	USP16	-351	USP16;USP16;USP16	TSS1500;TSS1500;TSS1500	RWDD2B (-4902)	USP16 (-351)	18.7568	3.11821	16.0602	3.12578
	194	cg07718251	chr 16: 87671160	-0.0282995	4.51969e-05	0.344826	-4.07917	JPH3	34662	JPH3	Body	JPH3 (+34662)	SLC7A5 (+231939)	80.3635	3.63919	78.1723	3.89429
	195	cg16254746	chr 6: 30698843	-0.0355369	0.0020113	0.708241	-3.08856	TUBB	9421	FLOT1	Body	TUBB (+10687)	FLOT1 (+11609)	33.0543	4.62077	30.1321	5.82111
	196	cg25352397	chr 8: 24800883	0.0353226	0.00200469	0.708241	3.08954	NEFL	13248			NEFL (+13247)	NEFM (+29610)	70.699	4.98879	74.2863	5.63378
	197	cg19190519	chr 11: 123175740	0.0293491	0.000499681	0.566273	3.48093	MIR4493	76480			GRAMD1B (-220787)	CLMP (-109734)	63.8847	3.75208	66.658	3.30522
	198	cg14938587	chr 7: 155790392	-0.0295634	0.000599339	0.572506	-3.43191	Mir_598	-63718			SHH (-185426)	C7orf13 (+642955)	48.04	4.80402	44.7456	4.03321
	199	cg16588649	chr 19: 3463241	0.0311942	0.00114566	0.642673	3.25207	C19orf77	17299	NFIC;NFIC	3'UTR;3'UTR	C19orf77 (+17298)	NFIC (+96677)	82.4857	5.90268	86.2861	2.83911
	200	cg01233722	chr 14: 24838126	-0.0446915	0.00278877	0.736967	-2.99011	NFATC4	-175	NFATC4;NFATC4	Body;Body	NYNRIN (-29865)	NFATC4 (+1982)	21.539	7.28423	17.6135	5.39131
	201	cg27365991	chr 5: 123036376	0.0280213	3.21711e-05	0.293913	4.15753	CSNK1G3	155266			CSNK1G3 (+188584)		46.8747	4.87065	49.743	4.11472
	202	cg26190890	chr 6: 27107718	-0.0296641	0.000672918	0.590996	-3.40038	HIST1H4I	631	HIST1H2BK	3'UTR	HIST1H4I (+631)		41.3468	4.28079	37.9225	3.73998
	203	cg10822172	chr 7: 28338757	0.0283676	0.000152466	0.419767	3.78702	CREB5	-182	CREB5	TSS200	JAZF1 (-118321)	CREB5 (-113386)	20.0471	3.57575	23.3134	3.19434
	204	cg20554277	chr 14: 37506088	0.0321363	0.00145924	0.67051	3.18267	MIR4503	-84492	SLC25A21;SLC25A21	Body;Body	SLC25A21 (+135776)	PAX9 (+379316)	60.0071	4.73028	62.9067	4.70015
	205	cg08461576	chr 4: 102277629	0.0311899	0.00120124	0.650298	3.23859	FLJ20021	8696			BANK1 (-434134)	PPP3CA (-9002)	53.0482	4.39871	55.8064	4.01073
	206	cg26262157	chr 10: 6214079	-0.0314011	0.00128386	0.660662	-3.21956	MIR3155B	-19854	PFKFB3	Body	PFKFB3 (-30760)	RBM17 (+83131)	25.1657	4.62713	22.3851	5.19417
	207	cg23004409	chr 17: 43128367	-0.0337215	0.00186471	0.697251	-3.11097	DCAKD	611	DCAKD;DCAKD	5'UTR;5'UTR	DCAKD (+610)		37.9552	5.11581	34.5722	4.88022
	208	cg06875162	chr 1: 28184973	-0.0280099	8.52108e-05	0.38435	-3.92925	C1orf38	-14081			C1orf38 (-14081)	PPP1R8 (+27722)	27.7433	3.38596	24.8881	3.09384
	209	cg17045772	chr 1: 41444651	0.0283631	0.000195727	0.439333	3.72447	CTPS	-355	CTPS	TSS1500	CTPS (-355)		62.8839	3.7	66.4381	3.21899
	210	cg17341904	chr 12: 97433383	-0.0318449	0.00143838	0.669496	-3.18684	TRNA_Pseudo	57381			NEDD1 (+132383)		76.2118	4.51582	73.3659	4.98523
	211	cg01230325	chr 9: 96108319	-0.0361502	0.0022771	0.712495	-3.05149	C9orf129	377	C9orf129	5'UTR	FAM120A (-105853)	WNK2 (+161108)	39.1269	5.78197	37.0111	5.69035
	212	cg26033513	chr 3: 195595933	0.0341409	0.00199845	0.708241	3.09046	TNK2	628	TNK2;TNK2	Body;Body	MUC4 (-57090)	TNK2 (+26498)	71.9374	6.51401	76.5116	4.48285
	213	cg03304437	chr 4: 159092536	-0.0325102	0.0016431	0.686524	-3.14815	AK126266	621	FAM198B;FAM198B;FAM198B	5'UTR;5'UTR;5'UTR	FAM198B (+1665)	GRIA2 (+950801)	24.3927	5.17984	21.1772	3.33246
	214	cg11803392	chr 17: 64712432	-0.0293703	0.000695474	0.594451	-3.39136	MIR634	-70757	PRKCA	Body	CACNG5 (-160915)	PRKCA (+413507)	60.0615	3.75422	58.3377	4.95535
	215	cg05314420	chr 2: 95690169	-0.0277588	3.26076e-05	0.293913	-4.15445	MAL	-1309	MAL;MAL;MAL;MAL	TSS1500;TSS1500;TSS1500;TSS1500	MAL (-1309)		41.6898	4.77564	39.5307	4.78792
	216	cg09226986	chr 6: 160852328	-0.0312755	0.00138272	0.666224	-3.19823	LPAL2	79828	SLC22A3	Body	SLC22A3 (+82904)	LPA (+235078)	44.0006	4.6545	42.1113	5.47364
	217	cg02480199	chr 5: 145725913	0.0295331	0.000778924	0.612929	3.36018	POU4F3	7327			TCERG1 (-100959)	POU4F3 (+7327)	42.5158	3.26372	44.6947	4.58607
	218	cg10287485	chr 11: 69473145	0.0318762	0.00158383	0.686524	3.15887	BC133018	-292			ORAOV1 (+17019)	CCND1 (+17273)	42.7927	4.5861	46.5565	4.20299
	219	cg11168687	chr 4: 185726782	-0.030521	0.00120353	0.650298	-3.23804	ACSL1	160	ACSL1	5'UTR	MLF1IP (-71497)	ACSL1 (+20432)	31.9227	6.46875	29.6873	5.8238
	220	cg22007237	chr 11: 68452938	0.0349461	0.00228367	0.712495	3.05062	GAL	956	GAL	Body	GAL (+956)		66.4022	5.18912	69.5877	5.45185
	221	cg21189611	chr 9: 97691844	0.029673	0.000922519	0.621916	3.31315	C9orf3	8359	C9orf3	Body	C9orf3 (+169914)	FANCC (+388146)	51.2481	4.65342	54.5723	4.48892
	222	cg15702949	chr 2: 131130836	0.0413143	0.00292616	0.741069	2.97539	PTPN18	1195	PTPN18;PTPN18	3'UTR;3'UTR	CFC1 (-147830)	PTPN18 (+17257)	39.1661	5.9569	43.4757	5.39066
	223	cg26144202	chr 17: 7256361	0.0306482	0.00134476	0.665832	3.20625	KCTD11	1154	KCTD11	1stExon	TMEM95 (-2135)		73.3241	4.15758	76.2838	3.97693
	224	cg10776533	chr 3: 184037459	-0.0282927	0.000409517	0.564431	-3.53387	EIF4G1	-641	EIF4G1;EIF4G1;EIF4G1;EIF4G1;EIF4G1	Body;Body;TSS1500;5'UTR;Body	FAM131A (-17816)	EIF4G1 (+5177)	41.8729	3.29202	39.3859	3.59111
	225	cg01754756	chr 10: 88728078	-0.0301197	0.00117536	0.646192	-3.24479	C10orf116	-109	C10orf116	TSS200	AGAP11 (-2419)	C10orf116 (-109)	27.5925	4.45445	24.197	4.04651
	226	cg10513330	chr 2: 28829939	0.0280152	0.000310376	0.518797	3.60648	PLB1	5174	PLB1;PLB1	Body;Body	PPP1CB (-144674)	PLB1 (+111002)	55.2726	3.21616	57.5537	4.01292
	227	cg18256640	chr 15: 26047382	-0.0351016	0.00243478	0.718478	-3.03133	MIR4715	46590	ATP10A	Body	UBE3A (-363208)	ATP10A (+60966)	52.5147	5.51432	49.9718	6.0542
	228	cg08731435	chr 12: 132381984	-0.04362	0.00319881	0.74821	-2.94796	ULK1	2706	ULK1	Body	PUS1 (-31828)	ULK1 (+2706)	58.5437	7.29885	57.2193	9.55784
	229	cg10066231	chr 7: 99646992	-0.0339209	0.00228906	0.712495	-3.04992	ZSCAN21	-424	ZSCAN21	TSS1500	ZSCAN21 (-424)		58.9559	4.053	56.7754	6.46826
	230	cg06013117	chr 5: 174153318	0.0325313	0.00200385	0.708241	3.08966	MSX2	1744	MSX2	Body	MSX2 (+1744)	DRD1 (+717844)	34.0321	4.4742	38.1027	5.88131
	231	cg08844966	chr 1: 18435244	-0.0279971	0.000374319	0.543791	-3.55756	IGSF21	1005	IGSF21	Body	KLHDC7A (-372179)	IGSF21 (+1005)	25.8988	4.20566	23.0245	3.41987
	232	cg18235088	chr 6: 32120623	0.0326892	0.00207594	0.70868	3.07915	PRRT1	237	PPT2;PRRT1;PPT2	TSS1500;TSS1500;TSS1500	PRRT1 (-904)	PPT2 (-605)	50.4461	5.48108	55.0071	5.2658
	233	cg04021544	chr 7: 2705189	-0.0567534	0.0035072	0.752226	-2.91939	AMZ1	-13973			AMZ1 (-13973)	TTYH3 (+33587)	33.4997	9.08987	30.0682	9.25777
	234	cg02901790	chr 8: 144391601	-0.0312177	0.00170847	0.68697	-3.13672	TOP1MT	16047	TOP1MT	3'UTR	ZNF696 (+18043)	TOP1MT (+25448)	79.9445	3.97305	77.7158	5.27904
	235	cg22729726	chr 1: 3123854	-0.0286055	0.000675934	0.590996	-3.39916	MIR4251	79316	PRDM16;PRDM16	Body;Body	ARHGEF16 (-247292)	PRDM16 (+138113)	63.0208	4.57305	59.4549	5.04926
	236	cg26153715	chr 14: 104808474	0.0542648	0.00351503	0.752226	2.91869	AX746996	169724			C14orf180 (-237581)	KIF26A (+203415)	45.1416	7.80598	50.0598	7.63669
	237	cg06056929	chr 7: 8476128	-0.0339183	0.00240392	0.71839	-3.03518	NXPH1	2544	NXPH1	Body	NXPH1 (+2544)		31.7486	5.37053	28.7155	4.41546
	238	cg21775279	chr 1: 28285385	0.0312227	0.00175368	0.68697	3.12906	XKR8	-1118	XKR8;SMPDL3B	TSS1500;3'UTR	XKR8 (-1118)		80.0772	4.79083	83.2339	3.52614
	239	cg20530835	chr 7: 2056550	-0.0370584	0.00288944	0.740278	-2.97926	MAD1L1	-76365	MAD1L1;MAD1L1;MAD1L1	Body;Body;Body	MAD1L1 (+216032)	ELFN1 (+307753)	68.6801	6.67633	66.1304	7.98985
	240	cg06389574	chr 2: 133834998	0.0315732	0.00186707	0.697251	3.1106	BC031872	161843	NCKAP5;NCKAP5	Body;Body	LYPD1 (-406518)	NCKAP5 (+491032)	44.7816	5.08101	48.7191	4.50833
	241	cg04220416	chr 14: 105045877	-0.0277256	0.0003436	0.533445	-3.58	C14orf180	-178	C14orf180	TSS200	C14orf180 (-178)		46.0244	3.55153	43.3942	3.87324
	242	cg00306578	chr 16: 71570932	0.0269539	1.47375e-05	0.243536	4.33258	CHST4	352	CHST4;CHST4	Body;Body	CHST4 (+10779)	TAT (+40065)	76.9344	3.48495	79.5891	3.86817
	243	cg02733842	chr 7: 1102375	0.0324315	0.00213945	0.710362	3.07016	GPR146	5235	C7orf50;C7orf50;C7orf50	Body;Body;Body	GPER (-25347)	GPR146 (+5235)	67.9256	5.38426	70.4064	4.99048
	244	cg09446583	chr 2: 43398271	0.03087	0.00174593	0.68697	3.13036	ZFP36L2	55474			HAAO (-378521)	ZFP36L2 (+55473)	67.5058	4.70803	69.775	4.38628
	245	cg23656161	chr 22: 17847424	0.0269529	4.78974e-05	0.345832	4.06566	CECR2	6586			CECR1 (-156646)	CECR2 (-109205)	66.019	3.4169	68.8294	3.57589
	246	cg19188899	chr 13: 112838565	-0.0299951	0.00142204	0.668462	-3.19014	AK055145	76202			SPACA7 (-192085)	SOX1 (+116653)	64.8144	4.75324	62.0197	5.54536
	247	cg10482632	chr 1: 201476606	-0.0272393	0.000174947	0.433531	-3.75269	CSRP1	-219	CSRP1;CSRP1	TSS1500;TSS1500	CSRP1 (-640)		34.8251	3.41696	31.3707	3.94075
	248	cg00783712	chr 1: 239974513	0.0309817	0.00179421	0.68697	3.12234	CHRM3	-96238	CHRM3	5'UTR	FMN2 (-280671)	CHRM3 (+182141)	61.5163	5.12474	65.3425	4.24501
	249	cg18812079	chr 14: 101987018	0.0283462	0.000735589	0.607847	3.37596	DIO3AS	34995			RTL1 (-635835)	DIO3 (-40669)	68.9361	5.00068	71.455	3.93482
	250	cg23123731	chr 10: 80161611	-0.0269706	8.55399e-05	0.38435	-3.92832	AK126491	134513			ZMIZ1 (-667180)	RPS24 (+368094)	50.8962	3.1425	48.061	2.97819
	251	cg03219809	chr 11: 63752561	-0.0300637	0.00150299	0.679232	-3.17411	OTUB1	-763	OTUB1;OTUB1	TSS1500;TSS1500	OTUB1 (-763)		73.8128	3.45795	71.3447	4.80585
	252	cg04391135	chr 1: 3427598	-0.0334702	0.00251743	0.726825	-3.02124	MEGF6	20414	MEGF6	Body	ARHGEF16 (+56452)	MEGF6 (+100460)	80.2607	5.44223	77.4903	5.29699
	253	cg07881210	chr 17: 398090	-0.0330194	0.00240896	0.71839	-3.03455	FAM101B	-102359			RPH3AL (-195458)	VPS53 (+220005)	50.1431	4.8571	45.8957	5.57042
	254	cg08923624	chr 4: 725336	-0.0329376	0.00239521	0.71839	-3.03628	PCGF3	-2336	PCGF3	5'UTR	PCGF3 (+25764)	CPLX1 (+94608)	73.7804	5.29462	71.1459	4.84922
	255	cg09257782	chr 2: 216805757	0.0308277	0.0018664	0.697251	3.11071	Mir_548	62199			FN1 (-504967)	MREG (+72588)	60.5406	4.31674	64.1166	4.40973
	256	cg18102633	chr 19: 17487776	0.041835	0.0034998	0.752226	2.92005	PLVAP	361	PLVAP	1stExon	PLVAP (+360)		74.5443	6.20396	78.4191	5.89537
	257	cg01434608	chr 16: 66637927	-0.0273113	0.00030657	0.515194	-3.60968	CMTM3	-7	CMTM3;CMTM3;CMTM3;CMTM3	TSS1500;TSS1500;TSS1500;TSS1500	CMTM3 (-300)		36.3131	4.41463	33.0218	4.15456
	258	cg12528056	chr 11: 60619955	-0.0376651	0.00320524	0.74821	-2.94734	PTGDR2	1240	GPR44	3'UTR	PTGDR2 (+3488)	CCDC86 (+10527)	76.1489	5.90417	73.3558	6.89894
	259	cg09375205	chr 11: 63885665	0.0298966	0.00156126	0.686524	3.16305	FLRT1	1926	FLRT1;MACROD1	Body;Body	FLRT1 (+14304)	MACROD1 (+47919)	78.4038	4.92194	82.2917	4.46537
	260	cg20654462	chr 15: 93580092	-0.0319611	0.00224451	0.712495	-3.05581	RGMA	36297			RGMA (+37123)	CHD2 (+136542)	66.6766	4.93752	64.0561	4.65166
	261	cg16080125	chr 7: 2774654	-0.0313913	0.00208968	0.709355	-3.07718	AMZ1	32545	GNA12	Body	AMZ1 (+55492)	GNA12 (+109304)	23.2025	5.43197	20.4098	6.01186
	262	cg16942681	chr 18: 21032779	-0.0681024	0.00401232	0.77173	-2.87719	RIOK3	-7	RIOK3	TSS200	RIOK3 (-7)		40.7684	12.347	33.833	7.97736
	263	cg03662014	chr 16: 29086271	-0.0364973	0.00316016	0.74821	-2.95171	RRN3P2	109	RRN3P2	Body	LAT (+90125)	NPIPL1 (+329537)	35.0109	6.32693	31.5484	6.10218
	264	cg21047429	chr 19: 55993241	-0.0391337	0.00339843	0.752226	-2.92919	ZNF628	669	ZNF628	Body	NAT14 (-3315)		77.7354	6.11964	75.0811	7.45699
	265	cg14577319	chr 15: 79576704	0.0351863	0.0030186	0.7434	2.96584	LOC729911	-417	ANKRD34C	5'UTR	RASGRF1 (-193490)	TMED3 (-26786)	38.8635	4.99404	42.3172	4.98245
	266	cg19376097	chr 4: 187765617	-0.0313368	0.00215882	0.71158	-3.06747	FAT1	-117767			FAT1 (-120631)		32.9203	6.54161	30.1998	5.25877
	267	cg02122610	chr 22: 47022418	-0.0292469	0.00140009	0.666595	-3.19463	GRAMD4	-229	GRAMD4	TSS1500	GRAMD4 (-229)		76.9276	4.27109	74.8275	5.08814
	268	cg18278528	chr 5: 149996672	0.0267559	0.000137992	0.405463	3.81174	SYNPO	-533	SYNPO;SYNPO	5'UTR;TSS1500	MYOZ3 (-43731)	SYNPO (+16031)	70.8528	4.06352	73.3739	4.02093
	269	cg07023317	chr 8: 28961315	-0.0388213	0.00345529	0.752226	-2.92403	KIF13B	-4557	KIF13B	Body	KIF13B (+159294)	HMBOX1 (+213405)	45.9898	5.58323	42.9509	6.22035
	270	cg16516295	chr 3: 129147846	-0.0372984	0.0033436	0.750889	-2.93425	C3orf25	-352	C3orf25	TSS1500	C3orf25 (-353)		42.8863	5.03156	40.0147	5.81211
	271	cg10249814	chr 17: 55630218	-0.0290843	0.00137192	0.666224	-3.20049	7SK	-236591	MSI2;MSI2	Body;Body	MSI2 (+296288)	MRPS23 (+297214)	66.2254	3.37313	63.9858	4.78596
	272	cg00470007	chr 12: 132930066	-0.0311506	0.00219298	0.712495	-3.06277	GALNT9	-24161			P2RX2 (-265336)	GALNT9 (-24162)	61.918	4.63865	58.8785	5.72727
	273	cg14120896	chr 19: 56086441	-0.0338724	0.00295861	0.741216	-2.97201	ZNF579	4564			SGK110 (-29533)	ZNF579 (+5769)	66.8482	5.39006	62.9578	5.78488
	274	cg02140579	chr 4: 159091837	-0.0402341	0.00371956	0.762639	-2.90102	AK126266	-78	FAM198B;FAM198B;FAM198B	Body;Body;Body	FAM198B (+2364)	GRIA2 (+950102)	52.6937	8.35524	47.9684	5.75883
	275	cg00831710	chr 8: 144240945	0.0299842	0.00181688	0.688888	3.11864	LY6H	512	LY6H;LY6H;LY6H	Body;Body;Body	LY6H (+809)		15.9021	3.76065	18.7478	4.10644
	276	cg20668447	chr 12: 57579444	-0.037075	0.00346534	0.752226	-2.92313	MIR1228	-8842	LRP1	Body	NXPH4 (-31133)	LRP1 (+57163)	72.0232	5.04514	69.901	6.91089
	277	cg13571224	chr 4: 157881791	0.0263988	7.47775e-05	0.382584	3.96055	PDGFC	10755	PDGFC	Body	PDGFC (+10754)		67.7558	3.16221	70.7777	3.12691
	278	cg03498038	chr 14: 73570137	-0.027823	0.000889611	0.621916	-3.32329	RBM25	31803	RBM25	Body	PSEN1 (-33005)	RBM25 (+44917)	75.7269	3.00918	73.2688	4.33747
	279	cg18273421	chr 6: 31734554	-0.0423125	0.00397571	0.77173	-2.88008	SAPCD1	7353	C6orf27	Body	SAPCD1 (+7353)	VWA7 (+10553)	50.0823	8.11638	46.1499	3.97775
	280	cg08971217	chr 16: 87086785	-0.0358965	0.00339464	0.752132	-2.92954	AK125749	249583			FBXO31 (+330608)	FOXL1 (+474671)	39.9438	4.34505	36.5462	5.72762
	281	cg14990808	chr 6: 28493651	-0.0270894	0.000529778	0.566273	-3.46523	GPX5	-137	GPX5;GPX5	TSS200;TSS200	GPX5 (-137)		75.3472	4.20129	72.1393	6.0293
	282	cg02613380	chr 10: 99330076	-0.0354977	0.00340709	0.752226	-2.9284	ANKRD2	-2179	UBTD1	Body	ANKRD2 (-2179)		71.6328	5.15771	68.9403	5.43192
	283	cg17515480	chr 19: 48049039	-0.0487673	0.00426791	0.774623	-2.85765	ZNF541	198	ZNF541	Body	NAPA (-30525)	ZNF541 (+10073)	38.4988	7.88537	34.1896	6.4176
	284	cg14775960	chr 3: 126854109	-0.0412555	0.00400936	0.77173	-2.87742	C3orf56	-57864			PLXNA1 (+146673)	TPRA1 (+455458)	40.9728	8.11523	38.6061	6.48973
	285	cg00282953	chr 5: 175793541	-0.027125	0.000613628	0.572506	-3.42552	ARL10	1040	ARL10	Body	KIAA1191 (-4733)	ARL10 (+1040)	44.475	4.01907	42.8766	4.29261
	286	cg05002166	chr 1: 217119469	0.0286234	0.00143615	0.669496	3.18729	ESRRG	-6454	ESRRG;ESRRG;ESRRG	5'UTR;5'UTR;5'UTR	ESRRG (-222656)	GPATCH2 (+684939)	57.7479	4.393	61.1286	4.07512
	287	cg01233664	chr 2: 191612466	0.0269144	0.000504025	0.566273	3.47861	NAB1	88583			GLS (-133080)	NAB1 (+98619)	67.334	4.70502	70.4209	3.12102
	288	cg02821416	chr 6: 2842941	-0.0262046	8.14337e-05	0.38435	-3.94014	SERPINB1	-860	SERPINB1	TSS1500	SERPINB1 (-861)		69.877	2.7726	67.7297	3.04347
	289	cg07901130	chr 6: 11041295	0.033477	0.00316648	0.74821	2.9511	LOC100506409	-2695	ELOVL2	Body	ELOVL2 (+3328)	SYCP2L (+154232)	69.8928	4.71327	73.5615	5.20542
	290	cg04194664	chr 17: 43716617	-0.0337139	0.00320952	0.74821	-2.94692	C17orf69	277	C17orf69;C17orf69	Body;Body	PLEKHM1 (-148472)	CRHR1 (-145028)	58.3647	6.95955	56.3409	6.98358
	291	cg02069944	chr 17: 79191523	-0.0314787	0.00264515	0.732389	-3.00622	AZI1	5228	AZI1;AZI1	Body;Body	AATK (-51652)	AZI1 (+5227)	66.1348	6.06123	63.5655	5.98258
	292	cg22291711	chr 15: 37349039	-0.0299822	0.00209234	0.709355	-3.0768	MEIS2	41523	MEIS2;MEIS2;MEIS2;MEIS2;MEIS2;MEIS2;MEIS2	Body;Body;Body;Body;Body;Body;Body	MEIS2 (+43701)		53.225	3.98667	50.975	5.59659
	293	cg23161733	chr 10: 108385382	0.0269543	0.000570071	0.572381	3.44547	5S_rRNA	-344396	SORCS1;SORCS1	Body;Body	SORCS1 (+539083)		72.6111	3.83238	75.6361	3.49313
	294	cg27281791	chr 8: 106636449	-0.0311202	0.00258676	0.731434	-3.013	ZFPM2	-66668	ZFPM2	Body	OXR1 (-823702)	ZFPM2 (+305303)	50.4966	4.87771	47.4867	3.71359
	295	cg13007784	chr 22: 30901249	0.0307089	0.00243071	0.718478	3.03184	SEC14L4	449	SEC14L4;SEC14L4	Body;Body	SEC14L4 (+448)		37.125	4.05578	40.3722	4.656
	296	cg09501762	chr 16: 28331449	-0.0389066	0.00399017	0.77173	-2.87894	SBK1	27610	SBK1	Body	SBK1 (+27610)	NPIPL1 (+36525)	70.4347	7.42312	69.1492	8.22302
	297	cg15463563	chr 8: 134224890	-0.0427815	0.004268	0.774623	-2.85764	WISP1	-385	WISP1;WISP1	Body;Body	WISP1 (+21609)	NDRG1 (+84656)	77.4089	5.64941	74.7072	7.9208
	298	cg11122944	chr 17: 9924800	-0.0265759	0.000443837	0.564431	-3.51255	GAS7	-1481	GAS7;GAS7;GAS7	Body;Body;5'UTR	RCVRN (-116117)	GAS7 (+177067)	22.9932	3.35475	20.1214	3.42852
	299	cg08031982	chr 16: 87577539	-0.0441002	0.00436588	0.778201	-2.85044	BC131758	49738			JPH3 (-58959)	ZCCHC14 (-52080)	62.5615	6.72867	57.434	9.30169
	300	cg12260643	chr 19: 36435669	-0.0437666	0.00435897	0.778201	-2.85094	LRFN3	7648	LRFN3	Body	SDHAF1 (-50420)	LRFN3 (+7648)	75.9424	5.89667	73.404	8.42647
	301	cg22284390	chr 17: 36978605	-0.0385435	0.00402346	0.77173	-2.87632	CWC25	2984	CCDC49	Body	PIP4K2B (-22448)	RPL23 (+31447)	58.5312	6.0667	56.0468	6.04069
	302	cg08211853	chr 2: 3658933	-0.030058	0.00227227	0.712495	-3.05213	COLEC11	5292	COLEC11;COLEC11	Body;Body	ALLC (-46852)	COLEC11 (+16297)	58.1732	4.97322	55.6136	6.39146
	303	cg19582115	chr 14: 103436037	-0.0312101	0.00274966	0.736967	-2.99442	CDC42BPB	-5050	CDC42BPB	Body	AMN (+47045)	CDC42BPB (+87704)	72.5952	4.2627	69.8562	5.23632
	304	cg11213091	chr 7: 195475	-0.0345037	0.00352844	0.752226	-2.9175	FAM20C	2507	FAM20C	Body	FAM20C (+2507)	PDGFA (+364005)	61.9525	4.78678	59.4198	5.65792
	305	cg18404281	chr 9: 80263384	0.0266516	0.000522595	0.566273	3.4689	GNA14	-152	GNA14	TSS200	GNA14 (-153)		22.5491	4.02473	24.8654	3.5841
	306	cg03503988	chr 20: 52827774	0.0339347	0.00343252	0.752226	2.92609	PFDN4	3273	PFDN4	Body	DOK5 (-264491)	PFDN4 (+3273)	53.8803	5.51547	57.9402	4.95397
	307	cg20906640	chr 3: 149182207	-0.0296392	0.00216468	0.71158	-3.06666	TM4SF4	-10160			TM4SF1 (-86640)	TM4SF4 (-10160)	74.5941	3.61149	72.1388	4.51353
	308	cg24381155	chr 10: 103289745	-0.0280999	0.00139606	0.666224	-3.19546	DPCD	-40660	BTRC;BTRC	Body;Body	POLL (+58281)	BTRC (+175921)	46.5094	4.46006	43.8172	4.71175
	309	cg07719898	chr 1: 200274728	0.0275163	0.00107415	0.634339	3.27035	C1orf98	68192			FAM58BP (+92073)	ZNF281 (+104437)	67.6511	3.76268	70.3496	3.68912
	310	cg06913219	chr 20: 25433878	-0.0302045	0.00237876	0.716339	-3.03835	NINL	5734	NINL	3'UTR	GINS1 (+45556)	NINL (+132274)	39.8132	4.99837	37.5629	4.86318
	311	cg20249277	chr 7: 112120877	-0.0272313	0.000942958	0.626034	-3.30702	C7orf53	-30	C7orf53;C7orf53	TSS200;TSS200	C7orf53 (-30)		52.2451	6.0931	50.1595	5.13169
	312	cg15043318	chr 5: 170947897	0.0261585	0.00019525	0.439333	3.72508	FGF18	101231			FGF18 (+101231)	FBXW11 (+485979)	45.8505	4.02693	48.6366	3.85449
	313	cg22123915	chr 1: 86047807	-0.0270391	0.000837776	0.619158	-3.34	AL832891	281	CYR61	Body	CYR61 (+1364)	ZNHIT6 (+126308)	61.5135	3.37494	58.7309	4.02474
	314	cg08222913	chr 3: 52553049	-0.0270448	0.000858766	0.621916	-3.33312	STAB1	311	STAB1	Body	NT5DC2 (+14743)	STAB1 (+23694)	56.9561	4.53342	54.6283	5.12113
	315	cg21825039	chr 2: 224620707	-0.0319726	0.00304976	0.745247	-2.96268	AP1S3	81612	AP1S3	3'UTR	SCG2 (-153491)	AP1S3 (+81611)	75.1198	5.77659	72.7352	6.72212
	316	cg10464773	chr 6: 164171506	-0.0367042	0.00398527	0.77173	-2.87933	AK093114	78871			QKI (+335832)		41.6081	5.63297	38.6666	6.45773
	317	cg26942829	chr 6: 13408158	-0.0310344	0.00279216	0.736967	-2.98974	GFOD1	211	GFOD1	Body	TBC1D7 (-79372)	GFOD1 (+79710)	42.8615	5.50459	39.5253	5.57595
	318	cg07416364	chr 2: 200733828	0.0274876	0.00111968	0.639343	3.25859	FONG	-17932			C2orf69 (-42150)	FONG (-17933)	61.6086	4.50297	64.5951	3.86263
	319	cg05167973	chr 11: 2949546	0.0281611	0.00153214	0.684286	3.16853	PHLDA2	1048	PHLDA2	3'UTR	SLC22A18AS (-24372)	PHLDA2 (+1103)	32.5134	4.52731	33.8474	5.3278
	320	cg00879840	chr 16: 78323024	-0.0267645	0.000695193	0.594451	-3.39147	WWOX	189698	WWOX	Body	WWOX (+189698)		64.7684	4.50549	62.1512	3.74678
	321	cg24457649	chr 10: 73472344	0.0286073	0.00176711	0.68697	3.12682	CDH23	-16	C10orf105;C10orf105;CDH23	3'UTR;3'UTR;Body	C10orf105 (+7233)	CDH23 (+315654)	59.0224	3.91969	60.5259	5.13203
	322	cg20022862	chr 11: 67219498	0.0274617	0.00112706	0.641562	3.25672	CABP4	-387	GPR152	1stExon	CABP4 (-3319)	GPR152 (+701)	58.6614	3.88129	61.973	3.9655
	323	cg00022145	chr 22: 49452167	0.0257058	1.01358e-06	0.0803974	4.88898	LOC100128946	189586			FAM19A5 (+566880)	BRD1 (+766284)	72.7123	1.98197	75.2695	2.48639
	324	cg26086948	chr 20: 44097731	0.0287348	0.00180069	0.68697	3.12128	WFDC2	-662	WFDC2	TSS1500	WFDC2 (-662)		66.5388	3.89303	69.4253	3.80392
	325	cg21199045	chr 18: 76324738	0.0349605	0.00374746	0.762959	2.89867	SALL3	-415536			SALL3 (-415536)		56.4894	5.44418	59.8229	5.17568
	326	cg09292202	chr 12: 1901788	0.0282672	0.00160725	0.686524	3.15459	CACNA2D4	19101	CACNA2D4	3'UTR	LRTM2 (-27644)	ADIPOR2 (+101542)	60.6912	4.00458	64.0022	4.30788
	327	cg06913337	chr 16: 88590404	-0.0361395	0.00393417	0.769755	-2.88339	C16orf85	42721	ZFPM1	Body	ZC3H18 (-46384)	ZFPM1 (+70391)	30.8969	6.56786	27.9966	5.2618
	328	cg24809529	chr 7: 100881286	0.0297559	0.00233257	0.712495	3.04426	CLDN15	-59	CLDN15	TSS200	CLDN15 (-60)		38.7817	4.42449	41.7791	5.06509
	329	cg26065946	chr 10: 94445035	0.0259305	0.000150886	0.419767	3.78961	HHEX	-4645			HHEX (-4645)		76.6226	3.68816	79.2937	2.79958
	330	cg11426899	chr 19: 59067429	-0.0293151	0.00219676	0.712495	-3.06226	CHMP2A	-943	CHMP2A;UBE2M;CHMP2A	TSS1500;3'UTR;TSS1500	CHMP2A (-944)		59.1478	4.57291	57.8744	6.13383
	331	cg17328880	chr 19: 17415155	-0.0307595	0.00280322	0.736967	-2.98853	ABHD8	-873	MRPL34;ABHD8	TSS1500;TSS1500	MRPL34 (-1321)	ABHD8 (-874)	46.398	5.5639	43.9121	5.58957
	332	cg16653408	chr 22: 42313569	0.0256488	1.0931e-05	0.218718	4.39789	SHISA8	-2898			SHISA8 (-2899)		45.8988	2.72745	48.516	3.03676
	333	cg07092111	chr 10: 32621403	0.0261418	0.000326492	0.528773	3.59332	EPC1	14710	EPC1	Body	KIF5B (-276033)	EPC1 (+14709)	20.7846	3.88563	23.7294	3.95524
	334	cg02632742	chr 2: 60187357	-0.0290432	0.00210425	0.709802	-3.07511	JA536032	46621			BCL11A (+593275)		62.5478	3.57086	60.6641	5.22166
	335	cg05073720	chr 18: 60386672	-0.0307181	0.00283861	0.737742	-2.98469	PHLPP1	4001	PHLPP1	Body	PHLPP1 (+4001)	BCL2 (+599940)	38.0866	6.29788	36.3035	6.4953
	336	cg17922695	chr 17: 75451809	-0.0338301	0.00363905	0.753825	-2.90787	41161	1735	SEPT9;SEPT9;SEPT9;SEPT9;SEPT9;SEPT9	Body;5'UTR;Body;Body;Body;Body	TNRC6C (-548508)	SEPT9 (+174318)	49.0835	7.14404	46.8514	7.96948
	337	cg22627841	chr 17: 48546258	-0.0303854	0.00269293	0.733423	-3.00078	CHAD	-31	CHAD;ACSF2	TSS200;Body	CHAD (-32)		11.5011	5.23054	8.98847	3.50135
	338	cg24647108	chr 7: 1575737	0.0297821	0.00244474	0.718618	3.0301	FW339998	-1221	MAFK	5'UTR	MAFK (+5370)	TMEM184A (+20328)	70.899	3.97801	74.3218	4.76846
	339	cg23551917	chr 3: 45077070	0.0270337	0.000998875	0.627527	3.29084	CLEC3B	9312	CLEC3B	Body	CLEC3B (+9312)	CDCP1 (+110843)	68.2453	3.80511	70.8859	3.15667
	340	cg07885166	chr 16: 75512616	0.0260681	0.000316652	0.518797	3.60128	CHST6	1110	CHST6	Body	TMEM170A (-14033)	CHST6 (+16309)	83.9449	3.6003	86.1087	2.59018
	341	cg03605463	chr 16: 89740564	0.0510109	0.00488055	0.788489	2.81481	BC031657	11320			CHMP1A (-16436)	CDK10 (-12511)	84.5357	8.77815	89.0629	6.32849
	342	cg06462966	chr 2: 236501410	-0.0333376	0.00356754	0.752226	-2.91407	AGAP1	98678	AGAP1;AGAP1	Body;Body	AGAP1 (+98678)	GBX2 (+575241)	68.0438	5.92668	66.2896	6.37801
	343	cg08716584	chr 11: 60157161	-0.0296625	0.0024422	0.718618	-3.03041	MS4A14	-6325	MS4A7;MS4A7;MS4A7;MS4A7	Body;Body;Body;Body	MS4A14 (-6325)	MS4A7 (+11204)	69.3549	4.68033	65.8017	3.98548
	344	cg14260083	chr 7: 4876858	-0.0352483	0.00406896	0.77173	-2.87277	RADIL	830	RADIL	Body	PAPOLB (+24766)	KIAA0415 (+61597)	66.6107	5.70821	63.1734	6.75982
	345	cg02071305	chr 15: 41185973	0.0298925	0.00260297	0.731561	3.01111	VPS18	-654	VPS18	TSS1500	VPS18 (-654)		15.5165	4.2958	18.9747	4.20491
	346	cg16667251	chr 2: 54697181	-0.0266849	0.000856352	0.621916	-3.33391	SPTBN1	12784	SPTBN1	5'UTR	RPL23AP32 (-59177)	SPTBN1 (+13728)	23.1186	4.67368	20.9103	3.96131
	347	cg20433382	chr 6: 125331312	0.0271724	0.00120048	0.650298	3.23877	RNF217	26799	RNF217	Body	TPD52L1 (-143566)	RNF217 (+26799)	52.8119	3.90098	54.8958	3.68856
	348	cg13055709	chr 1: 234852861	-0.0356652	0.00415473	0.771755	-2.86617	LOC100506810	-6927			IRF2BP2 (-107591)	TOMM20 (+439394)	43.8049	8.81375	41.8561	9.45284
	349	cg04386563	chr 12: 130060028	0.0362818	0.00423865	0.773252	2.85983	TMEM132D	328184	TMEM132D	Body	TMEM132D (+328183)	GLT1D1 (+721948)	65.5007	6.97438	69.2539	5.8182
	350	cg04580443	chr 11: 115547056	0.0282377	0.00188264	0.699114	3.10815	LOC283143	83859			CADM1 (-171816)		70.9056	4.20208	73.8502	3.36329
	351	cg13730105	chr 9: 120466837	-0.0382398	0.00451872	0.778556	-2.83948	TLR4	378	TLR4;TLR4;TLR4	Body;Body;1stExon	TLR4 (+378)		28.3148	6.81586	24.0396	5.33952
	352	cg27234109	chr 11: 1308428	-0.0323329	0.00354509	0.752226	-2.91604	TOLLIP	15545	TOLLIP	Body	TOLLIP (+22463)	MUC5B (+64134)	71.8357	5.53544	69.8057	5.56012
	353	cg13678009	chr 11: 9684886	0.0325352	0.00356939	0.752226	2.9139	SWAP70	-741	SWAP70	TSS1500	SWAP70 (-741)		56.9538	4.73186	60.4168	4.58522
	354	cg24859236	chr 1: 9750213	0.0280592	0.00180668	0.68699	3.1203	PIK3CD	-1311	PIK3CD	5'UTR	PIK3CD (+38424)	CLSTN1 (+134336)	28.0004	4.40918	31.8261	4.08865
	355	cg24336674	chr 2: 204602302	0.0263639	0.000738681	0.607847	3.3748	CD28	31105	CD28	3'UTR	CTLA4 (-130208)	CD28 (+31105)	70.4112	3.83905	73.3293	3.45336
	356	cg27190967	chr 16: 2039391	0.0337031	0.00395056	0.771059	2.88208	SYNGR3	-554	SYNGR3	TSS1500	SYNGR3 (-554)		25.4417	4.7985	29.2427	5.49941
	357	cg01464186	chr 10: 52191661	0.0270915	0.00130823	0.660662	3.21417	SGMS1	-13721	SGMS1	5'UTR	ASAH2 (-183292)	SGMS1 (+192075)	42.643	4.3851	44.9763	4.28599
	358	ch.10.34144754F	chr 10: 34104748	0.0555346	0.00519835	0.791244	2.79448	LOC100505583	-43140			NRP1 (-480916)	PARD3 (+999504)	42.0685	8.21391	46.67	8.55512
	359	cg25888386	chr 10: 115141887	-0.0319621	0.00350241	0.752226	-2.91981	HABP2	-168702			HABP2 (-170890)	TCF7L2 (+431879)	51.2139	7.30009	47.9457	7.74878
	360	cg18741175	chr 3: 54067944	-0.0278748	0.00178548	0.68697	-3.12377	7SK	33070			SELK (-141956)	CACNA2D3 (-88748)	63.2479	4.92814	61.2857	4.72731
	361	cg10157902	chr 5: 958969	-0.0329242	0.00376563	0.76462	-2.89716	LOC100506688	38486			NKD2 (-50198)	TRIP13 (+66001)	66.9261	4.56139	64.3424	5.6903
	362	cg16492341	chr 10: 26856105	0.0280787	0.0019185	0.699729	3.10257	LINC00264	-22688	APBB1IP	Body	PDSS1 (-130489)	APBB1IP (+128840)	13.3755	3.01394	16.786	4.40185
	363	cg23707540	chr 10: 126836038	-0.0323462	0.00364001	0.753825	-2.90778	CTBP2	11247	CTBP2;CTBP2	5'UTR;5'UTR	C10orf137 (-572045)	CTBP2 (-119586)	39.8507	5.93765	35.6991	6.48118
	364	cg03157150	chr 16: 4738680	-0.0312079	0.00333226	0.750889	-2.9353	NUDT16L1	-5013	MGRN1;MGRN1;MGRN1;MGRN1	3'UTR;Body;3'UTR;Body	NUDT16L1 (-5013)	MGRN1 (+63856)	72.6979	4.77651	70.2695	4.96123
	365	cg12222588	chr 18: 34823808	0.0414766	0.00493099	0.78914	2.81151	CELF4	29315	BRUNOL4;BRUNOL4;BRUNOL4;BRUNOL4	3'UTR;3'UTR;3'UTR;3'UTR	TPGS2 (-414651)	CELF4 (+322191)	39.059	7.11367	42.887	6.60744
	366	cg24328740	chr 1: 6653447	-0.026214	0.00073421	0.607847	-3.37648	KLHL21	6424	KLHL21	Body	KLHL21 (+9481)	ZBTB48 (+13385)	86.5303	3.16897	84.1395	3.28082
	367	cg21848407	chr 17: 61499094	0.0265195	0.000971828	0.627222	3.29856	CYB561	16216	TANC2	Body	CYB561 (+24450)	TANC2 (+412197)	74.8403	3.81053	77.3368	3.26036
	368	cg26884161	chr 1: 151303917	0.0304527	0.00314209	0.74821	2.95348	PI4KB	-3726			PI4KB (-3727)		61.2292	4.64445	65.6948	6.28428
	369	cg23009067	chr 7: 2775923	-0.0291179	0.00256283	0.731434	-3.01582	AMZ1	33814	GNA12	Body	AMZ1 (+56761)	GNA12 (+108035)	62.9009	4.07195	61.113	5.23002
	370	cg09573585	chr 10: 88728128	-0.025809	0.000449595	0.564431	-3.50912	C10orf116	-59	C10orf116	TSS200	AGAP11 (-2369)	C10orf116 (-59)	33.5711	3.19141	30.734	3.55228
	371	cg06591973	chr 18: 30353283	-0.030382	0.00312879	0.74821	-2.95479	KLHL14	-309	KLHL14	TSS1500	KLHL14 (-310)		30.8434	4.1122	28.4686	6.33241
	372	cg00107241	chr 1: 29461070	0.0424117	0.00505096	0.790221	2.80377	TMEM200B	-10649			TMEM200B (-10650)	SRSF4 (+47566)	64.923	6.07831	69.6829	7.89702
	373	cg27246453	chr 6: 32783881	0.0324354	0.00381798	0.767597	2.89282	HLA-DOB	944	HLA-DOB	Body	HLA-DQB2 (-52552)	TAP2 (+22665)	68.414	5.99626	71.7502	5.29499
	374	cg15822656	chr 7: 30321030	0.0283458	0.00217189	0.71158	3.06566	ZNRF2	-2892			ZNRF2 (-2892)		50.574	5.50163	53.7016	4.37362
	375	cg02729303	chr 5: 16508920	-0.0413054	0.00501964	0.789773	-2.80577	FAM134B	187	FAM134B;FAM134B;FAM134B	Body;1stExon;5'UTR	ZNF622 (-43027)	FAM134B (+108246)	49.4238	7.15145	45.17	6.17882
	376	cg16163174	chr 6: 164506197	-0.028971	0.00251805	0.726825	-3.02116	AK093114	413562			QKI (+670523)		51.0505	5.37985	49.1208	6.18052
	377	cg25353142	chr 20: 43729869	-0.0258955	0.000542741	0.568409	-3.45872	KCNS1	-116	KCNS1	TSS200	KCNS1 (-117)		21.5726	3.13352	18.9022	3.07118
	378	cg00786909	chr 1: 227163427	-0.0300857	0.00304091	0.74492	-2.96357	ADCK3	-1677	CABC1	Body	ADCK3 (+35490)	CDC42BPA (+342398)	45.5442	7.12876	44.1363	6.77198
	379	cg10904856	chr 14: 102094175	0.0283632	0.00223014	0.712495	3.05774	DIO3	66488			PPP2R5C (-133959)	DIO3 (+66488)	71.8039	4.5233	75.24	3.58373
	380	cg17301216	chr 15: 89920348	0.0287621	0.002414	0.71839	3.03392	LOC254559	-924	LOC254559	TSS1500	POLG (-42323)	RHCG (+119450)	26.7676	5.23402	30.0368	4.85267
	381	cg04189187	chr 10: 6183528	0.0343921	0.00432812	0.778201	2.8532	PFKFB3	-3314			PFKFB3 (-61311)	RBM17 (+52580)	53.2146	5.70875	56.0305	6.20624
	382	cg08410533	chr 10: 375830	0.0301068	0.00312754	0.74821	2.95492	DIP2C	40077	DIP2C	Body	ZMYND11 (+149897)	DIP2C (+359777)	27.0699	3.37489	30.4654	5.15923
	383	cg20943372	chr 3: 186993527	-0.0300535	0.00308429	0.74821	-2.95921	BX648496	-15532	MASP1;MASP1;MASP1	Body;Body;Body	MASP1 (+16282)	RTP1 (+78254)	59.9574	5.47842	57.7743	4.12581
	384	cg03630596	chr 9: 139925856	-0.0299063	0.00303125	0.74474	-2.96455	FUT7	1436	C9orf139;FUT7	5'UTR;Body	ABCA2 (-3117)		73.6072	4.22478	70.4364	4.67309
	385	cg02466798	chr 19: 941571	0.0253151	0.00018453	0.438232	3.7393	ARID3A	15535	ARID3A	Body	GRIN3B (-58865)	ARID3A (+15535)	23.1845	2.75886	26.1633	4.40471
	386	cg24555670	chr 8: 18244502	0.0302437	0.00319123	0.74821	2.94869	NAT2	-4252			NAT2 (-4252)		60.98	4.65101	63.5225	4.377
	387	cg05643453	chr 1: 160159453	-0.0264056	0.0010288	0.631568	-3.28253	CASQ1	-831	CASQ1	TSS1500	CASQ1 (-831)		40.3826	3.84301	38.3336	3.50327
	388	cg27117982	chr 12: 16500077	-0.0281222	0.00215094	0.710885	-3.06856	MGST1	2	MGST1;MGST1;MGST1;MGST1	TSS1500;5'UTR;1stExon;TSS1500	MGST1 (-501)		54.6484	3.61565	51.9164	4.0318
	389	cg15495966	chr 11: 10697072	-0.0254092	0.000247748	0.461737	-3.66458	MRVI1	18049	MRVI1;MRVI1;MRVI1	5'UTR;5'UTR;5'UTR	CTR9 (-75738)	MRVI1 (-23225)	46.1205	3.66825	42.8827	4.74453
	390	cg23238119	chr 6: 74009041	0.0326238	0.0039993	0.77173	2.87822	KHDC1	10897	C6orf147	Body	KHDC1 (-36135)	DPPA5 (+54957)	20.9192	5.49905	25.4032	5.14696
	391	cg06033443	chr 21: 45658683	0.0290847	0.00270769	0.734665	2.99911	ICOSLG	2151	ICOSLG	Body	ICOSLG (+2150)	C21orf33 (+105190)	41.505	5.03805	44.9432	5.53741
	392	cg14598764	chr 3: 125820484	0.0257875	0.000538287	0.566273	3.46094	SLC41A3	-93	SLC41A3	TSS200	SLC41A3 (-17351)	ALDH1L1 (+79000)	62.614	3.45575	65.3963	2.80263
	393	cg10570158	chr 11: 19546133	0.0269786	0.00151078	0.679338	3.1726	NAV2-AS4	-508	NAV2	Body	E2F8 (-283627)	NAV2 (-188747)	21.0857	4.01479	24.284	3.94014
	394	cg08390901	chr 2: 109747264	0.0282013	0.00224674	0.712495	3.05552	LOC100287216	-689	LOC100287216;SH3RF3	TSS1500;Body	SH3RF3 (+1268)	SEPT10 (+624518)	42.8099	4.72949	45.4476	5.26928
	395	cg16907885	chr 17: 79317768	0.0260036	0.000753494	0.612929	3.36934	TMEM105	-13294			BAHCC1 (-55771)	TMEM105 (-13295)	19.9303	4.4061	21.9506	4.43364
	396	cg15360648	chr 12: 106328228	-0.0249733	1.85242e-05	0.253334	-4.28198	NUAK1	205583			APPL2 (-698221)	NUAK1 (+205582)	25.6077	3.32665	24.1558	4.31993
	397	cg21926118	chr 2: 190387206	0.0327724	0.00407033	0.77173	2.87266	7SK	-48389			SLC40A1 (+58330)	WDR75 (+81048)	60.7274	4.78462	64.0769	5.21775
	398	cg09010891	chr 16: 2027571	0.025568	0.000441455	0.564431	3.51397	TBL3	57	TBL3	Body	NOXO1 (+3868)	TBL3 (+5508)	81.152	4.20537	83.5748	2.31139
	399	cg25991026	chr 6: 143542226	0.0286934	0.00257723	0.731434	3.01412	AIG1	160143	AIG1	Body	AIG1 (+160204)	ADAT2 (+229614)	68.7038	4.88598	72.2695	3.65326
	400	cg24115596	chr 14: 38051289	0.0271203	0.00167774	0.68697	3.14204	FOXA1	12178			SLC25A21 (-409425)	FOXA1 (+13199)	71.85	4.6942	74.9839	4.10728
	401	cg02271119	chr 7: 157198869	-0.0255847	0.000463532	0.564431	-3.50099	DNAJB6	26360	DNAJB6	Body	DNAJB6 (+69160)		36.2958	4.03038	34.8577	4.94461
	402	cg10239022	chr 12: 131533104	-0.0279796	0.00219027	0.712495	-3.06314	AX748157	-20747	GPR133	Body	SFSWAP (-662530)	GPR133 (+94653)	63.9883	4.10289	61.3838	4.64248
	403	cg24749564	chr 5: 54923223	0.0266945	0.00136775	0.666224	3.20137	SLC38A9	65331	SLC38A9	Body	PPAP2A (-92351)	SLC38A9 (+85330)	67.6154	4.32717	70.4875	2.67279
	404	cg11117637	chr 5: 149546366	0.0259416	0.000772303	0.612929	3.36254	CDX1	23	CDX1;CDX1	1stExon;5'UTR	CDX1 (+23)		81.7845	3.96048	84.5222	3.51276
	405	cg19137818	chr 3: 45837556	-0.025559	0.000465652	0.564431	-3.49977	SLC6A20	479	SLC6A20;SLC6A20	Body;Body	SLC6A20 (+478)		28.2299	3.44684	25.3056	2.72407
	406	cg20783970	chr 1: 234754601	-0.0310945	0.0036073	0.752469	-2.9106	IRF2BP2	-9330			IRF2BP2 (-9331)	TOMM20 (+537654)	61.8225	4.2616	59.3692	5.87386
	407	cg13724311	chr 17: 7163599	0.0257108	0.000573912	0.572506	3.44365	CLDN7	2665	CLDN7	3'UTR	CLDN7 (+2664)	C17orf81 (+8049)	69.2977	4.32741	71.7894	2.15546
	408	cg04115026	chr 5: 14294830	0.028115	0.00228908	0.712495	3.04991	TRIO	1710	TRIO	Body	TRIO (+151002)	ANKH (+577056)	68.8586	4.34728	72.1684	3.71636
	409	cg22644321	chr 8: 126446923	-0.0258835	0.000738497	0.607847	-3.37487	TRIB1	981	TRIB1	Body	TRIB1 (+4361)		52.9705	6.06777	50.2771	5.72899
	410	cg00643296	chr 8: 28174928	-0.0284809	0.00250258	0.724997	-3.02303	PNOC	280	PNOC	5'UTR	PNOC (+280)		38.6687	3.91807	35.7436	3.86562
	411	cg18562121	chr 2: 27076093	-0.0296451	0.00313119	0.74821	-2.95456	DPYSL5	4802	DPYSL5	5'UTR	MAPRE3 (-117431)	DPYSL5 (+5125)	42.2836	4.54012	40.6097	5.68367
	412	cg00671224	chr 12: 10770150	0.0273319	0.00186931	0.697429	3.11025	MAGOHB	-3942			MAGOHB (-3943)		67.474	5.3514	70.8034	4.20344
	413	cg19616851	chr 7: 63363811	0.0252919	0.000357329	0.534779	3.56975	BC042811	2611			LOC643955 (-599378)	ZNF727 (-142009)	68.179	3.13344	70.6067	2.78293
	414	cg13860928	chr 1: 209915875	0.0267553	0.00155894	0.686524	3.16348	TRAF3IP3	-13518			TRAF3IP3 (-13518)	HSD11B1 (+37740)	40.954	5.49222	44.0366	5.15766
	415	cg06232512	chr 2: 240612347	-0.0254717	0.000503124	0.566273	-3.47909	LOC150935	-72206			HDAC4 (-289705)	NDUFA10 (+352471)	69.7478	3.70127	67.8127	3.39892
	416	cg06753513	chr 17: 3977385	0.0248717	6.05451e-05	0.356555	4.01068	ZZEF1	-3167	ZZEF1	Body	ATP2A3 (-109628)	ZZEF1 (+68867)	78.5369	2.70435	80.8991	2.91176
	417	cg18739166	chr 3: 3866752	-0.0267167	0.00153981	0.684752	-3.16707	LRRN1	-19573	LRRN1	5'UTR	SETMAR (-478235)	LRRN1 (+25632)	46.5232	3.18876	44.2556	4.266
	418	cg05406637	chr 14: 51332290	0.0269469	0.0016988	0.68697	3.13839	ABHD12B	-6587			NIN (-34452)	ABHD12B (-6587)	70.4145	5.36317	73.7931	4.04885
	419	cg16826307	chr 12: 46062678	0.0275332	0.0020853	0.70868	3.07781	BC053951	11071			PLEKHA8P1 (-452890)	ARID2 (-60941)	52.4482	3.83539	54.8401	4.05077
	420	cg03068068	chr 19: 36203512	0.0256051	0.000602873	0.572506	3.43032	ZBTB32	-317	ZBTB32	TSS1500	ZBTB32 (-317)		68.8198	4.07321	71.4573	3.8709
	421	cg02478762	chr 3: 185915431	-0.0282461	0.00250538	0.725279	-3.02269	ETV5	-88530	DGKG;DGKG;DGKG	Body;Body;Body	ETV5 (-88531)	DGKG (+164591)	69.6624	4.12375	67.5822	4.45991
	422	cg17136073	chr 13: 23310675	0.0290997	0.00298501	0.741778	2.96928	BC048997	-83805			SGCG (-444384)		76.3662	4.04157	78.6707	4.41828
	423	cg14161400	chr 6: 97344833	-0.0288428	0.00286267	0.740278	-2.98211	NDUFAF4	-39	NDUFAF4	Body	NDUFAF4 (+933)		50.0351	4.49511	48.3658	5.11409
	424	cg26101942	chr 8: 28232176	0.025112	0.00028977	0.497501	3.62428	ZNF395	11414	ZNF395	5'UTR	ZNF395 (+11800)	PNOC (+57528)	65.3484	3.33035	67.4699	3.30928
	425	cg08672140	chr 5: 77845045	-0.030647	0.00366591	0.756845	-2.90556	SCAMP1	91428	LHFPL2	5'UTR	LHFPL2 (+99602)	SCAMP1 (+188707)	43.3464	4.75263	40.526	4.20504
	426	cg03431918	chr 17: 77716367	-0.0257645	0.000782002	0.612929	-3.35909	ENPP7	11486			CBX2 (-35609)	ENPP7 (+11486)	21.4168	3.84725	18.6415	3.59211
	427	cg04571509	chr 15: 51199642	-0.0274969	0.00212433	0.710362	-3.07228	AP4E1	-1226	AP4E1	TSS1500	AP4E1 (-1226)		26.2772	4.3692	23.6753	3.66265
	428	cg24601055	chr 1: 87372153	0.0259544	0.000948184	0.626034	3.30547	41167	7954	SEP15;SEP15	Body;Body	SEP15 (+7953)	SH3GLB1 (+201901)	33.1776	3.99659	35.5587	4.48412
	429	cg23513363	chr 10: 43817997	-0.026536	0.00145342	0.670496	-3.18383	FXYD4	-49094			RASGEF1A (-55631)	FXYD4 (-49094)	39.2384	4.16041	37.3635	4.29028
	430	cg16115072	chr 17: 25938812	-0.027409	0.0020797	0.70868	-3.07861	KSR1	1873	KSR1	Body	LGALS9 (-19361)	KSR1 (+139777)	61.4217	4.63623	59.879	5.902
	431	cg01993818	chr 14: 34270437	0.0498071	0.00576767	0.800286	2.76071	EGLN3	149595	NPAS3;NPAS3;NPAS3;NPAS3	3'UTR;3'UTR;3'UTR;3'UTR	EGLN3 (+149846)	NPAS3 (+861979)	74.9634	8.9503	80.1244	7.18128
	432	cg01520447	chr 2: 106498162	0.0263123	0.00127049	0.660662	3.22256	NCK2	29959	NCK2;NCK2;NCK2	Body;Body;Body	C2orf40 (-183950)	NCK2 (+29959)	86.0317	3.72303	88.3005	3.44805
	433	cg14275445	chr 10: 134560047	-0.0363382	0.00502406	0.789773	-2.80549	NKX6-2	39490	INPP5A	Body	NKX6-2 (+39489)	INPP5A (+208695)	62.8207	5.4442	60.6695	6.65089
	434	cg01462607	chr 19: 52206446	0.0330703	0.00442883	0.778556	2.84588	LINC00085	240	NCRNA00085	Body	SIGLEC14 (-56315)	HAS1 (+20774)	30.5454	4.09321	32.7059	6.17533
	435	cg16767737	chr 19: 3492180	-0.0269183	0.00177824	0.68697	-3.12497	DOHH	8441	DOHH;DOHH	Body;Body	C19orf77 (-11641)	DOHH (+8440)	89.9042	2.5178	87.5448	4.32456
	436	cg07574683	chr 11: 134585270	0.0262972	0.00129004	0.660662	3.21819	AK125040	-20568			B3GAT1 (-303459)		72.3979	4.80123	75.0847	3.2269
	437	cg08305942	chr 16: 79692354	-0.0268047	0.00175017	0.68697	-3.12965	MAF	-57732			DYNLRB2 (-882499)	MAF (-57733)	51.3529	5.39503	48.9507	5.9033
	438	cg00480381	chr 16: 7382796	0.0267347	0.00171195	0.68697	3.13613	RBFOX1	46	A2BP1;A2BP1;A2BP1;A2BP1;A2BP1;A2BP1;A2BP1;A2BP1;A2BP1	Body;5'UTR;Body;1stExon;5'UTR;1stExon;1stExon;5'UTR;Body	RBFOX1 (+46)		53.8749	5.1117	57.0166	4.41093
	439	cg16896313	chr 15: 58552619	-0.0313368	0.00406462	0.77173	-2.8731	ALDH1A2	18843			LIPC (-171555)	AQP9 (+122212)	52.1401	6.09405	51.0228	7.52863
	440	cg10381813	chr 1: 918696	-0.0357671	0.0050657	0.790613	-2.80283	C1orf170	-1223	C1orf170	TSS1500	HES4 (+16855)	KLHL17 (+22730)	51.6847	6.2765	49.3632	6.05737
	441	cg19560370	chr 11: 373541	-0.027878	0.00244926	0.718827	-3.02954	B4GALNT4	3747	B4GALNT4	Body	PKP3 (-20675)	B4GALNT4 (+3747)	74.0893	3.73764	71.9031	4.58975
	442	cg06906952	chr 1: 244230760	-0.0375297	0.00526471	0.791244	-2.79037	AK310634	13663			ZNF238 (+16200)	ADSS (+384675)	57.1886	5.87166	53.2068	5.4328
	443	cg07389810	chr 10: 45800337	-0.0304368	0.00375186	0.763327	-2.8983	OR13A1	-467	OR13A1	5'UTR	C10orf25 (-303868)	OR13A1 (+10718)	58.9573	4.31331	56.2627	4.50455
	444	cg11289777	chr 3: 33158930	-0.0351435	0.00499566	0.789773	-2.80731	CRTAP	3377	CRTAP	Body	CRTAP (+3481)	SUSD5 (+101776)	52.8912	5.76042	50.7936	6.0135
	445	cg11963202	chr 7: 98985799	-0.025447	0.000675679	0.590996	-3.39926	ARPC1B	13502	ARPC1B	Body	ARPC1B (+13502)	PDAP1 (+20505)	85.7359	2.27564	83.4686	3.84207
	446	cg25372165	chr 18: 76463364	-0.03067	0.00389412	0.769755	-2.88661	SALL3	-276910			SALL3 (-276910)		64.214	3.98469	61.7723	5.3896
	447	cg17434366	chr 4: 2746469	-0.0269121	0.00187838	0.698835	-3.10882	TNIP2	11283	TNIP2;TNIP2	Body;Body	TNIP2 (+11633)	RNF4 (+275675)	80.113	2.96888	78.1412	5.07473
	448	cg10254698	chr 14: 93669495	-0.0345326	0.00491461	0.78914	-2.81258	UBR7	-3905	C14orf142	3'UTR	UBR7 (-3905)		58.0228	5.92886	55.0192	5.2509
	449	cg18123677	chr 3: 167454339	-0.0259821	0.00110681	0.634339	-3.26187	SERPINI1	829	SERPINI1;SERPINI1	5'UTR;5'UTR	PDCD10 (-1689)	SERPINI1 (+908)	30.2543	4.83155	28.5594	6.37313
	450	cg06760279	chr 14: 23947073	-0.0420417	0.00568142	0.798457	-2.76562	NGDN	8176	NGDN;NGDN	3'UTR;Body	NGDN (+8176)	ZFHX2 (+73784)	71.049	7.8336	67.5401	5.7111
	451	cg02146091	chr 20: 30135177	-0.0287787	0.00301314	0.74317	-2.96639	PSIMCT-1	-7	HM13;HM13;HM13;PSIMCT-1	Body;Body;Body;TSS200	ID1 (-57908)	HM13 (+32937)	22.0212	5.04782	20.2124	5.15315
	452	cg16277139	chr 13: 113744320	-0.0257249	0.000903432	0.621916	-3.31899	F7	-15784	MCF2L;MCF2L	Body;Body	F7 (-15784)	MCF2L (+120786)	84.0033	3.23327	82.2048	4.16408
	453	cg16935597	chr 17: 76129099	0.0258402	0.00100731	0.628908	3.28848	TMC6	-611	TMC8;TMC6	Body;TSS1500	TMC6 (-4239)	TMC8 (+2241)	59.4296	5.43739	61.4884	4.65526
	454	cg10170504	chr 7: 130698652	-0.0249497	0.000298917	0.506627	-3.61624	FLJ43663	93137	FLJ43663;FLJ43663	Body;Body	MKLN1 (-313942)	KLF14 (-279765)	55.4633	4.11399	53.0802	3.90531
	455	cg07680042	chr 11: 12203294	0.024827	0.000189407	0.439333	3.73274	MICAL2	19669	MICAL2	Body	MICALCL (-105152)	MICAL2 (+71157)	77.5285	3.54557	79.983	3.45968
	456	cg07447870	chr 4: 6370956	0.0311266	0.00409339	0.77173	2.87087	PPP2R2C	12641	PPP2R2C;PPP2R2C	Body;Body	WFS1 (+99380)	PPP2R2C (+186448)	37.9483	5.5093	41.4346	5.2226
	457	cg05481881	chr 3: 150621326	0.0300677	0.00361718	0.752469	2.90975	CLRN1	38222			SIAH2 (-140064)	CLRN1 (+69459)	42.2998	4.62589	45.5305	4.90008
	458	cg04536957	chr 3: 184487758	0.024648	9.20936e-05	0.388556	3.91053	VPS8	-42172			VPS8 (-42172)	EPHB3 (+208172)	73.4609	4.00285	75.5549	3.88829
	459	cg23689441	chr 1: 1248347	-0.0256508	0.000895003	0.621916	-3.32161	ACAP3	-3358	CPSF3L	Body	PUSL1 (+4354)	CPSF3L (+11698)	80.0519	3.46969	77.7464	4.0312
	460	cg10754395	chr 7: 158109694	-0.0413462	0.00571073	0.798457	-2.76394	MIR595	215811	PTPRN2;PTPRN2;PTPRN2	Body;Body;Body	PTPRN2 (+270787)	DNAJB6 (+979985)	63.9929	6.72657	61.6288	7.93869
	461	cg23346001	chr 7: 19408343	0.0307532	0.00404143	0.77173	2.87491	FERD3L	-223299			FERD3L (-223300)	TWISTNB (+340316)	66.443	5.28384	69.4326	3.84019
	462	cg25898092	chr 12: 120033862	-0.0262834	0.00145575	0.670496	-3.18336	AF086288	-1556	TMEM233	Body	PRKAB1 (-71898)	TMEM233 (+2599)	23.0483	3.96307	20.3278	3.4051
	463	cg09977361	chr 11: 120008836	-0.0352959	0.00515668	0.791244	-2.79708	TRIM29	27	TRIM29;TRIM29	1stExon;5'UTR	TRIM29 (+26)		44.3546	5.39824	41.1691	5.68843
	464	cg22138597	chr 11: 82396872	-0.0257597	0.00100158	0.627527	-3.29008	FAM181B	48034			PRCP (+214684)		74.8939	3.43651	72.7256	3.68914
	465	cg02531506	chr 11: 134019149	0.0371022	0.00539417	0.791244	2.7825	AK095267	6777	JAM3	3'UTR	NCAPD3 (+75276)	JAM3 (+80330)	65.2801	7.22313	69.0496	5.3039
	466	cg27656362	chr 5: 72607795	-0.0251161	0.000560971	0.570305	-3.44981	FOXD1	136557			FOXD1 (+136556)	TMEM174 (+138773)	18.5425	3.97093	16.1836	2.25282
	467	cg01328190	chr 16: 14529714	-0.0351816	0.00518644	0.791244	-2.79522	mir-108-1	-126484	PARN;PARN	3'UTR;3'UTR	PARN (+194413)	MKL2 (+364519)	61.6905	5.55199	59.1099	5.76188
	468	cg21139046	chr 3: 14339700	-0.0301982	0.0038657	0.769755	-2.88892	AX747368	99641			SLC6A6 (-104405)	LSM3 (+119473)	36.8474	5.44909	34.5527	4.89891
	469	cg00160522	chr 4: 1007062	-0.0441851	0.00593207	0.800286	-2.75151	FGFRL1	1129	FGFRL1;FGFRL1;FGFRL1	Body;Body;Body	FGFRL1 (+1303)	RNF212 (+100289)	83.6053	5.81495	80.3783	7.96512
	470	cg15526035	chr 14: 54686833	-0.0275623	0.00248792	0.722863	-3.02481	CDKN3	-176839			BMP4 (-265564)	CDKN3 (-176839)	21.529	4.54215	18.6442	4.19198
	471	cg04794662	chr 3: 71178485	0.0254951	0.000887032	0.621916	3.3241	FOXP1	1607	FOXP1	Body	FOXP1 (+115830)		27.587	3.34924	30.151	3.10864
	472	cg18624059	chr 2: 31362226	0.024927	0.000426982	0.564431	3.52282	GALNT14	-634	GALNT14	TSS1500	GALNT14 (-635)		72.0119	3.50465	74.9057	3.26735
	473	cg05998295	chr 8: 21775764	-0.0312555	0.00428792	0.776084	-2.85617	XPO7	-1415	XPO7;XPO7	TSS1500;TSS1500	DOK2 (-4560)	XPO7 (-1415)	52.8017	4.77319	50.3176	4.78885
	474	cg01259871	chr 22: 41939256	-0.0279594	0.00275521	0.736967	-2.99381	POLR3H	1220	POLR3H;POLR3H;POLR3H	Body;Body;Body	POLR3H (+1219)	ACO2 (+74128)	70.5232	4.47602	68.2065	4.53586
	475	cg17766305	chr 10: 90147030	-0.0254182	0.00084289	0.619158	-3.33831	RNLS	158249	RNLS;RNLS	Body;Body	KLLN (-523837)	RNLS (+196051)	25.9768	3.2152	23.1082	3.28984
	476	cg02831900	chr 4: 184320640	0.0312333	0.00429686	0.776724	2.8555	CDKN2AIP	-45148			CLDN24 (-77062)	CDKN2AIP (-45148)	64.3688	4.76772	67.0372	5.65438
	477	cg14517390	chr 15: 78463330	-0.0247207	0.00024918	0.461737	-3.6631	IDH3A	11019	ACSBG1	3'UTR	IDH3A (+21612)	ACSBG1 (+63718)	77.7457	2.83251	75.323	3.78613
	478	cg05572417	chr 13: 113637815	0.038231	0.00563071	0.797914	2.76855	MCF2L	3834	MCF2L;MCF2L	Body;Body	F7 (-122289)	MCF2L (+14281)	49.0641	6.85284	53.6549	6.00671
	479	cg12309456	chr 17: 74475402	0.0256349	0.00103781	0.631568	3.28007	RHBDF2	2225	RHBDF2;RHBDF2	Body;Body	RHBDF2 (+8588)	AANAT (+11773)	88.497	3.91201	91.1401	2.89972
	480	cg25718223	chr 19: 13915877	0.0287983	0.00327948	0.750889	2.94025	ZSWIM4	272	ZSWIM4	Body	NANOS3 (-72185)	ZSWIM4 (+9604)	60.3079	4.58419	63.3362	4.02132
	481	cg11736167	chr 11: 118515159	-0.034002	0.00506121	0.790613	-2.80311	PHLDB1	2403	PHLDB1;PHLDB1;PHLDB1	Body;Body;Body	TREH (+35221)	ARCN1 (+72058)	58.3083	6.28229	56.2267	5.85404
	482	cg12186702	chr 19: 17487908	0.0249999	0.000536137	0.566273	3.46202	PLVAP	229	PLVAP	1stExon	PLVAP (+228)		62.2851	4.10205	64.1327	4.00842
	483	cg26672652	chr 8: 52325037	0.0246361	0.000216569	0.459132	3.69886	PXDNL	-2916	PXDNL	Body	PXDNL (+396967)		78.6621	3.88869	81.1332	3.36885
	484	cg22649187	chr 11: 69197324	0.0246968	0.000281999	0.497401	3.6313	AX746803	-31750			CCND1 (-258548)	TPCN2 (+380975)	75.1689	3.02262	77.4342	3.01398
	485	cg19082560	chr 5: 3603280	0.024849	0.000441697	0.564431	3.51383	IRX1	7113			IRX1 (+7113)		17.2932	2.87662	19.2495	3.60286
	486	cg25523633	chr 20: 2637111	0.0243065	2.81828e-05	0.286597	4.18767	SNORA51	1399	SNORD57;NOP56;NOP56;SNORD56	TSS1500;Body;Body;TSS200	NOP56 (+3934)	IDH3B (+7731)	67.3421	3.20058	70.0199	2.71266
	487	cg15464821	chr 1: 167682648	-0.0306014	0.00417084	0.771755	-2.86494	TRNA_Pro	-1313			CREG1 (-159593)	MPZL1 (-8538)	30.7188	4.61808	27.7042	4.2363
	488	cg09427156	chr 12: 57038117	-0.024802	0.000437377	0.564431	-3.51644	SNORD59B	-579	ATP5B;SNORD59B	Body;TSS1500	BAZ2A (-7955)	ATP5B (+1734)	62.7721	3.49995	60.7033	3.14195
	489	cg09368486	chr 2: 208890779	-0.0259946	0.00143097	0.668462	-3.18833	PLEKHM3	-495	PLEKHM3	TSS1500	PLEKHM3 (-496)		32.9432	4.69884	30.297	3.04794
	490	cg19838358	chr 12: 133304061	-0.0275511	0.00265853	0.733322	-3.00469	ANKLE2	7214	ANKLE2	Body	PGAM5 (+16669)	ANKLE2 (+34389)	76.5431	4.23427	74.1041	3.80793
	491	cg04751009	chr 14: 76123777	-0.0296131	0.00380108	0.767597	-2.89422	C14orf1	3761	C14orf1	Body	TTLL5 (-3773)	C14orf1 (+3760)	56.2106	5.79179	54.5126	4.63666
	492	cg06910994	chr 1: 171457611	0.0353657	0.00538976	0.791244	2.78277	PRRC2C	2946	BAT2L2	5'UTR	PRRC2C (+2946)	MYOC (+164161)	48.3559	6.81848	52.4854	3.93099
	493	cg21415060	chr 1: 159277295	0.026326	0.00173596	0.68697	3.13204	OR10J3	7154	FCER1A	Body	OR10J3 (+7153)	FCER1A (+17790)	38.7132	5.59875	40.7435	4.48118
	494	cg13374249	chr 2: 75295497	0.0279944	0.00292397	0.740988	2.97562	POLE4	109723	TACR1;TACR1	Body;Body	POLE4 (+109723)	TACR1 (+131147)	81.5875	6.3279	84.5414	3.47052
	495	cg22348992	chr 20: 61979563	-0.0405539	0.00594687	0.800286	-2.7507	CHRNA4	11488	CHRNA4	Body	CHRNA4 (+13131)	COL20A1 (+55026)	64.0158	6.2958	59.7669	8.30036
	496	cg07242860	chr 5: 140739522	-0.0245424	0.000221018	0.460556	-3.6937	PCDHGB2	-180	PCDHGA4;PCDHGA2;PCDHGB2;PCDHGA1;PCDHGB2;PCDHGB1;PCDHGA3	Body;Body;TSS200;Body;TSS200;Body;Body	PCDHGC5 (-129285)	TAF7 (-39172)	17.2004	3.27796	14.4259	2.28939
	497	cg10243567	chr 1: 200332938	0.0268731	0.00224466	0.712495	3.05579	C1orf98	9982			ZNF281 (+46227)	FAM58BP (+150283)	49.1974	4.77605	51.3369	3.58231
	498	cg20005760	chr 15: 44830861	0.0247532	0.000460524	0.564431	3.50273	EIF3J	1596	EIF3J	Body	EIF3J (+1596)	SPG11 (+125014)	73.5227	2.96526	76.0777	3.12176
	499	cg16641055	chr 16: 88846292	0.0271754	0.0024866	0.722863	3.02497	PIEZO1	5080	FAM38A	Body	PIEZO1 (+5079)	CTU2 (+73402)	60.2474	5.34983	63.185	4.04026
	500	cg25449950	chr 4: 24797174	0.0259167	0.00144342	0.669496	3.18583	SOD3	90	SOD3;SOD3	5'UTR;1stExon	SOD3 (+90)		36.8337	4.9837	40.2345	3.82504
	501	cg12853742	chr 14: 24780890	0.0356299	0.00550671	0.794269	2.77579	LTB4R	186	LTB4R;LTB4R2;LTB4R2;LTB4R2;LTB4R;CIDEB;LTB4R	5'UTR;Body;1stExon;Body;TSS1500;TSS1500;1stExon	CIDEB (-315)	LTB4R (+186)	49.2133	4.89515	52.4842	5.59275
	502	cg03292992	chr 11: 33759043	0.0260772	0.00162518	0.686524	3.15135	CD59	-1018	CD59;CD59;CD59;CD59	TSS1500;TSS1500;TSS1500;TSS1500	CD59 (-14771)	FBXO3 (+37027)	49.8068	3.63563	52.3639	3.35286
	503	cg23779377	chr 10: 134119443	-0.0317291	0.00469285	0.782298	-2.82739	STK32C	1273	STK32C	Body	STK32C (+2033)	DPYSL4 (+119030)	63.902	5.29551	62.0401	6.85669
	504	cg14677130	chr 5: 38445916	-0.0412521	0.00605704	0.800286	-2.74468	EGFLAM	339	EGFLAM;EGFLAM;EGFLAM;EGFLAM	Body;5'UTR;Body;Body	LIFR (+149590)	EGFLAM (+187406)	65.592	7.29729	60.8429	8.00924
	505	cg26235748	chr 14: 86087511	-0.0263958	0.00191596	0.699695	-3.10296	FLRT2	-347	FLRT2	5'UTR	FLRT2 (+91024)		43.6295	4.37156	41.0197	4.39575
	506	cg13496790	chr 3: 66455738	-0.029804	0.00402759	0.77173	-2.87599	LRIG1	899	LRIG1	Body	LRIG1 (+95106)	SLC25A26 (+336454)	54.6263	4.15204	52.4661	5.51804
	507	cg22032020	chr 15: 100121570	0.0277072	0.00289581	0.740278	2.97859	MEF2A	15438	MEF2A;MEF2A;MEF2A	5'UTR;5'UTR;5'UTR	MEF2A (+15438)	LYSMD4 (+152055)	48.0642	3.83019	50.8716	3.76547
	508	cg26681176	chr 14: 88675766	-0.0317858	0.00473916	0.782298	-2.82425	AX747031	25913	KCNK10;KCNK10;KCNK10	Body;Body;Body	KCNK10 (+113826)	GPR65 (+204299)	50.0272	5.42959	48.1857	6.65762
	509	cg02349468	chr 5: 1093661	-0.0298893	0.00408028	0.77173	-2.87189	SLC12A7	18511	SLC12A7	Body	SLC12A7 (+18510)	NKD2 (+84494)	62.4128	6.36551	60.1715	5.41245
	510	cg23296006	chr 14: 24503311	-0.0311681	0.00456294	0.778556	-2.83637	DHRS4L1	-2398			CPNE6 (-37424)	DHRS4 (+80347)	61.8706	4.10457	59.6473	5.58454
	511	cg20137415	chr 10: 133945044	-0.0307158	0.00446617	0.778556	-2.84321	JAKMIP3	-12175	JAKMIP3	Body	DPYSL4 (-55369)	JAKMIP3 (+26732)	74.2334	4.20574	72.4793	5.91031
	512	cg08877512	chr 16: 8862626	-0.024799	0.000587214	0.572506	-3.43745	ABAT	-13307	ABAT;ABAT;ABAT	Body;Body;Body	TMEM186 (+28878)	ABAT (+94183)	62.7639	2.82124	60.744	3.52057
	513	cg11866719	chr 14: 60336433	0.0256903	0.00138449	0.666224	3.19787	RTN1	1124	RTN1	Body	RTN1 (+1123)	JKAMP (+385273)	20.5993	3.11903	23.4074	3.86443
	514	cg16814786	chr 10: 51575763	-0.0261047	0.00175196	0.68697	-3.12935	NCOA4	-521	NCOA4;NCOA4;NCOA4;NCOA4;NCOA4	5'UTR;5'UTR;Body;TSS1500;Body	NCOA4 (+10656)	TIMM23 (+47572)	37.7279	5.35196	35.199	5.58365
	515	cg27158793	chr 7: 69434196	-0.0284685	0.0034079	0.752226	-2.92833	AUTS2	370292	AUTS2;AUTS2;AUTS2	Body;Body;Body	AUTS2 (+370292)		63.838	4.52771	61.9755	4.79683
	516	cg23077884	chr 2: 157395835	-0.0249385	0.00076026	0.612929	-3.36687	GPD2	28528	GPD2;GPD2	Body;Body	GALNT5 (-718504)	GPD2 (+102936)	54.2163	2.96615	51.9719	3.81317
	517	cg12078157	chr 6: 13612218	-0.031178	0.00469907	0.782298	-2.82697	NOL7	-3340	SIRT5	3'UTR	NOL7 (-3340)		47.466	5.36805	44.8236	5.2663
	518	cg15583285	chr 6: 99287924	-0.0255449	0.0013069	0.660662	-3.21446	POU3F2	5345			POU3F2 (+5345)	FBXL4 (+107924)	22.1959	3.86151	19.6618	3.07575
	519	cg14241731	chr 13: 28960733	0.0289784	0.00375312	0.763327	2.8982	FLT1	19298	FLT1;FLT1;FLT1	Body;3'UTR;Body	FLT1 (+108531)	PAN3 (+248091)	55.5921	4.42863	58.6678	4.83909
	520	cg27441138	chr 1: 228243608	0.02502	0.000883734	0.621916	3.32514	ARF1	-26752	WNT3A	Body	ARF1 (-26752)	WNT3A (+48886)	73.4463	3.03016	75.6871	3.26378
	521	cg03119028	chr 1: 89458849	-0.0246264	0.000515013	0.566273	-3.47282	CCBL2	-206	CCBL2;CCBL2;RBMXL1;RBMXL1	TSS1500;TSS1500;TSS1500;TSS1500	CCBL2 (-207)	RBMXL1 (-207)	36.0033	3.52141	33.2086	2.78787
	522	cg13859860	chr 10: 51569878	-0.0252416	0.0010976	0.634339	-3.26423	NCOA4	-2485	NCOA4;NCOA4;NCOA4	5'UTR;Body;Body	NCOA4 (+4771)	TIMM23 (+53457)	59.2249	3.58991	57.0334	3.11833
	523	cg06222397	chr 16: 86953019	0.0266221	0.00229428	0.712495	3.04923	BC041439	-197454			FOXL1 (+340905)	FBXO31 (+464374)	72.3324	4.02832	74.5069	3.94449
	524	cg14320920	chr 10: 97792309	-0.0253859	0.00125171	0.660145	-3.22683	CCNJ	-10849	CC2D2B;CC2D2B	3'UTR;3'UTR	CCNJ (-10849)	ENTPD1 (+320774)	71.7815	3.89499	69.7849	3.21615
	525	cg27658048	chr 7: 4201594	-0.0246549	0.000562252	0.570305	-3.4492	SDK1	32278	SDK1;SDK1	Body;Body	FOXK1 (-520335)	SDK1 (+860515)	84.0786	2.25323	81.7016	3.32
	526	cg10986236	chr 3: 4274847	-0.0318656	0.00497697	0.78914	-2.80852	SETMAR	-70140			SETMAR (-70140)	LRRN1 (+433727)	59.3377	4.18648	57.8641	6.87371
	527	cg08952844	chr 2: 88313351	-0.0288361	0.00374284	0.762801	-2.89906	KRCC1	14731			RGPD2 (-188066)	SMYD1 (-53947)	56.7874	4.50896	54.0264	4.5443
	528	cg08835403	chr 17: 4436580	0.0262591	0.00203482	0.708524	3.0851	SPNS2	-3476	SPNS2	Body	MYBBP1A (+22100)	SPNS2 (+34452)	77.6513	3.85351	80.1824	3.40623
	529	cg13844779	chr 9: 82093630	0.0260597	0.00184481	0.69326	3.11414	TLE4	-93247			TLE4 (-93247)		27.233	4.23809	29.9143	4.0839
	530	cg13044444	chr 6: 30029721	-0.0239948	6.25336e-05	0.356555	-4.00304	ZNRD1-AS1	-304	ZNRD1;NCRNA00171;ZNRD1	Body;TSS1500;Body	ZNRD1 (+686)		22.5093	2.93161	19.9472	2.30456
	531	cg23760103	chr 6: 31695973	0.0414321	0.00634249	0.800837	2.72953	DDAH2	1596	DDAH2	Body	DDAH2 (+2065)	C6orf25 (+4853)	67.7119	6.94051	72.5431	6.34936
	532	cg05726661	chr 17: 7348438	-0.0279119	0.00326892	0.750889	-2.94125	CHRNB1	33	CHRNB1;CHRNB1	1stExon;5'UTR	CHRNB1 (+33)		20.4328	5.68765	18.0136	3.46641
	533	cg01357958	chr 17: 43340592	-0.029171	0.00401177	0.77173	-2.87723	LOC100133991	1035	LOC100133991;MAP3K14;LOC100133991;C17orf46	Body;3'UTR;Body;TSS1500	FMNL1 (+41301)	MAP3K14 (+53821)	39.3134	4.35087	37.1182	5.29408
	534	cg08786674	chr 5: 2890332	-0.0278992	0.00328121	0.750889	-2.94009	C5orf38	138071			IRX1 (-705835)	C5orf38 (+138071)	57.9901	6.14886	55.5853	4.75465
	535	cg05348875	chr 2: 206628625	-0.0270497	0.00275721	0.736967	-2.99359	NRP2	81267	NRP2;NRP2;NRP2;NRP2;NRP2	Body;Body;Body;Body;Body	NRP2 (+81402)	INO80D (+322280)	29.2981	5.16667	27.9369	5.36251
	536	cg17121100	chr 19: 14071822	0.0244659	0.000486263	0.566273	3.48821	DCAF15	1262	DCAF15	3'UTR	PODNL1 (-7619)	RFX1 (+45311)	75.0951	3.28631	77.7298	3.08712
	537	cg12100242	chr 21: 38574170	0.0307915	0.00474124	0.782298	2.82411	DSCR9	-6633	TTC3;TTC3	3'UTR;3'UTR	DSCR3 (+65662)	TTC3 (+128600)	76.6466	5.64046	79.9506	4.03009
	538	cg01165909	chr 17: 41521676	0.0254213	0.00137093	0.666224	3.2007	MIR2117	-497	MIR2117	TSS1500	DHX8 (-39657)	ARL4D (+45324)	68.5632	4.83654	71.0917	4.88123
	539	cg17940464	chr 17: 75207380	0.0304131	0.00456401	0.778556	2.8363	SEC14L1	2453	SEC14L1;SEC14L1;SEC14L1;SEC14L1;SEC14L1	Body;Body;Body;Body;Body	SEPT9 (-70111)	SEC14L1 (+70376)	39.1706	5.65281	43.3015	6.03391
	540	cg13065475	chr 14: 61176368	0.0238964	4.13078e-05	0.337142	4.10004	SIX4	14484	SIX4	3'UTR	SIX1 (-60214)	SIX4 (+14483)	75.9356	3.3664	78.4302	2.687
	541	cg14057952	chr 2: 42097561	0.0274448	0.00306102	0.745531	2.96154	U4	-849			PKDCC (-177599)		71.4794	3.49695	74.124	4.73999
	542	cg22081879	chr 7: 108845010	0.0265721	0.00241999	0.71839	3.03317	C7orf66	-320373			C7orf66 (-320374)		48.6995	4.10689	52.1345	3.66405
	543	cg02760218	chr 6: 31866586	0.024395	0.000489556	0.566273	3.48641	C2	1025	EHMT2;EHMT2	TSS1500;TSS1500	EHMT2 (-1123)		26.1748	2.93107	28.5058	3.22747
	544	cg11553635	chr 10: 44104468	0.026826	0.00266533	0.733322	3.00391	ZNF485	2614	ZNF485	Body	ZNF485 (+2614)	ZNF32 (+39857)	61.4191	5.24487	64.9895	4.08999
	545	cg15635480	chr 20: 35090169	-0.0269289	0.00274577	0.736967	-2.99485	DLGAP4	28	DLGAP4;DLGAP4;DLGAP4;DLGAP4	5'UTR;Body;1stExon;5'UTR	MYL9 (-79727)	DLGAP4 (+94722)	30.7963	4.34058	28.1632	3.21665
	546	cg06574229	chr 9: 140064863	0.0261046	0.00204204	0.70868	3.08405	LRRC26	-372	LRRC26	TSS1500	LRRC26 (-373)		50.0813	3.84736	52.2076	3.39779
	547	cg13856584	chr 17: 36998108	-0.0267241	0.00260433	0.731561	-3.01095	C17orf98	-466	C17orf98	TSS1500	PIP4K2B (-41951)	RPL23 (+11944)	72.2712	4.58182	70.1678	5.91807
	548	cg16887334	chr 20: 3052151	-0.0346108	0.00583472	0.800286	-2.75693	OXT	-114	OXT	TSS200	OXT (-114)		80.9132	5.47277	76.559	6.63681
	549	cg22215489	chr 11: 66402027	0.0357915	0.00601825	0.800286	2.74679	RBM4	-4060			RBM14 (+17975)	RBM4B (+43247)	57.8219	5.30342	62.303	6.19215
	550	cg17618939	chr 5: 39138071	0.0294638	0.00430303	0.777131	2.85505	RICTOR	-63570	FYB;FYB	Body;Body	RICTOR (-63571)	FYB (+132687)	31.029	5.72291	34.0482	4.97922
	551	cg24804146	chr 8: 1821338	-0.0341907	0.00577277	0.800286	-2.76042	ARHGEF10	-2878	ARHGEF10	Body	MYOM2 (-171819)	ARHGEF10 (+49190)	73.3298	5.69815	70.7489	6.00332
	552	cg15443166	chr 7: 12247070	0.0264893	0.00242737	0.718478	3.03225	TMEM106B	-3777			TMEM106B (-3777)		67.9689	4.16536	70.9797	3.76243
	553	cg11708358	chr 6: 150183516	0.0306644	0.00486827	0.788063	2.81562	LOC100652739	-1117	LRP11	Body	LRP11 (+1963)	PCMT1 (+112686)	46.4041	3.40002	50.065	5.92137
	554	cg27448426	chr 7: 104413036	0.0260854	0.00210698	0.709802	3.07472	LOC645591	31503	LHFPL3	Body	MLL5 (-241600)	LHFPL3 (+443933)	58.3303	4.01981	61.2845	3.65044
	555	cg24636999	chr 6: 38751903	-0.0242454	0.000459845	0.564431	-3.50312	DNAH8	61352	DNAH8	Body	GLP1R (-264653)	DNAH8 (+68787)	72.4305	2.87788	70.2908	2.93207
	556	cg03947203	chr 11: 118987153	0.0263964	0.00240901	0.71839	3.03454	HINFP	-5079	C2CD2L	3'UTR	HINFP (-5079)	C2CD2L (+9061)	67.2992	2.85412	69.7038	4.11747
	557	cg06819546	chr 3: 62360674	0.026083	0.00212951	0.710362	3.07155	FEZF2	-1484	FEZF2	TSS1500	FEZF2 (-1485)		33.6465	4.09944	35.6917	3.67967
	558	cg10776230	chr 1: 245851226	-0.0286178	0.00400386	0.77173	-2.87786	KIF26B	41833	KIF26B	Body	KIF26B (+532940)	SMYD3 (+819417)	39.9816	4.24389	38.0023	5.0798
	559	cg23887948	chr 15: 74494854	0.030164	0.00473537	0.782298	2.82451	STRA6	366	STRA6;STRA6;STRA6;STRA6;STRA6	5'UTR;5'UTR;5'UTR;5'UTR;5'UTR	STRA6 (+365)		52.6989	6.25194	55.5062	5.11006
	560	cg15235893	chr 2: 235406363	0.0283848	0.00386747	0.769755	2.88877	ARL4C	-670	ARL4C	TSS1500	ARL4C (-671)		63.264	3.86066	66.6271	5.54878
	561	cg24811125	chr 10: 121138124	-0.0350783	0.0060576	0.800286	-2.74465	MIR4681	641	GRK5	Body	RGS10 (+164097)	GRK5 (+170928)	49.1514	4.85056	46.6955	6.69676
	562	cg18765565	chr 5: 669397	0.0663589	0.00708955	0.805162	2.69261	TPPP	9496	TPPP	Body	TPPP (+24112)	CEP72 (+56993)	17.7663	9.15741	22.8553	13.6693
	563	cg26466375	chr 8: 143868530	0.025393	0.00163489	0.686524	3.14961	LY6D	-522	LY6D	TSS1500	LY6D (-523)		75.4203	4.03453	77.8315	3.01908
	564	cg16512885	chr 1: 4697919	0.0297144	0.00458158	0.780187	2.83507	AJAP1	-17185			AJAP1 (-17185)	DFFB (+924075)	71.3863	4.72168	74.0314	5.05178
	565	cg26559250	chr 6: 158074478	0.033384	0.00580515	0.800286	2.75859	ZDHHC14	7710	ZDHHC14;ZDHHC14	Body;Body	SNX9 (-169815)	ZDHHC14 (+271922)	65.1794	6.22382	70.1011	7.03315
	566	cg26311782	chr 10: 712032	-0.0348171	0.00604649	0.800286	-2.74525	C10orf108	16016	DIP2C	Body	DIP2C (+23575)	ZMYND11 (+486099)	75.6726	5.56816	73.8431	6.78481
	567	cg03658337	chr 19: 6166119	-0.0344137	0.00601135	0.800286	-2.74716	ACSBG2	30410	ACSBG2	Body	ACSBG2 (+30410)	MLLT1 (+113839)	44.5671	5.23654	41.6957	5.36066
	568	cg13689563	chr 19: 12277357	0.0257213	0.00191386	0.699695	3.10328	ZNF136	3486	ZNF136	Body	ZNF136 (+3486)	ZNF44 (+128356)	47.0244	3.55066	49.9264	3.61835
	569	cg16123707	chr 10: 134049802	0.024083	0.000455676	0.564431	3.50554	STK32C	-8109	STK32C	Body	DPYSL4 (+49389)	STK32C (+71674)	72.3227	2.73006	74.9104	3.00211
	570	cg22315922	chr 6: 56622531	-0.0259688	0.00221582	0.712495	-3.05967	DST	-64430	DST;DST;DST;DST	Body;Body;Body;Body	KIAA1586 (-288852)	DST (-114838)	31.3909	3.99531	29.109	4.30687
	571	cg22656126	chr 17: 1637206	0.0310941	0.0052409	0.791244	2.79184	WDR81	3533	WDR81;WDR81;WDR81;WDR81	Body;Body;Body;Body	TLCD2 (-23545)	SERPINF2 (-8923)	80.6409	4.38471	83.2004	5.84469
	572	cg19257550	chr 9: 35673909	-0.0254468	0.00176914	0.68697	-3.12648	CA9	-5	CA9	TSS200	CA9 (-5)		46.2199	5.03731	44.5536	4.27636
	573	cg25623833	chr 12: 89888553	0.0276571	0.00356032	0.752226	2.9147	POC1B	2566	WDR51B	Body	DUSP6 (-142258)	GALNT4 (+30029)	68.1469	3.58644	70.9459	5.08042
	574	cg04099705	chr 16: 1397981	-0.0248948	0.00127029	0.660662	-3.22261	C16orf42	3892	BAIAP3	Body	GNPTG (-3918)	C16orf42 (+3891)	88.7099	2.73572	86.6749	4.10992
	575	cg26922625	chr 6: 31771646	-0.0295613	0.00466127	0.782298	-2.82956	LSM2	3115	LSM2	Body	VARS (-7935)	LSM2 (+3114)	68.5015	6.04598	65.6917	6.86746
	576	cg05614735	chr 17: 40936078	0.0294236	0.00460125	0.781042	2.8337	WNK4	452	WNK4	Body	WNK4 (+3430)	CCDC56 (+14625)	30.6656	4.83263	32.6933	4.87803
	577	cg15604241	chr 11: 35941235	0.0291591	0.00448056	0.778556	2.84218	LDLRAD3	-24376			LDLRAD3 (-24376)	TRIM44 (+256883)	47.6055	6.38127	51.3003	6.87564
	578	cg13659813	chr 19: 39322968	0.0264039	0.00270743	0.734665	2.99914	ECH1	-471	ECH1	TSS1500	LGALS4 (-19229)	HNRNPL (+17648)	22.6455	3.97571	25.8688	3.60516
	579	cg19730982	chr 7: 1062729	0.0289932	0.0044297	0.778556	2.84582	MIR339	-67	C7orf50;MIR339;C7orf50;C7orf50	Body;TSS200;Body;Body	GPR146 (-34411)	CYP2W1 (+39895)	44.7269	4.45956	48.701	6.09
	580	cg01228352	chr 3: 150329615	-0.0297636	0.00483072	0.785789	-2.81811	SELT	8550	SELT	Body	SELT (+8550)	SIAH2 (+151647)	86.8999	3.32898	84.5038	5.28689
	581	cg05726109	chr 22: 19709755	0.0354852	0.00636106	0.802161	2.72856	GP1BB	3764	SEPT5;GP1BB	Body;TSS1500	TBX1 (-34470)	GP1BB (+3764)	50.0865	7.49	55.3496	6.51334
	582	cg13594542	chr 9: 138850547	-0.0267025	0.00301316	0.74317	-2.96639	UBAC1	2679	UBAC1	Body	CAMSAP1 (-51543)	UBAC1 (+2678)	56.4584	3.46321	52.982	4.8086
	583	cg09976876	chr 16: 57184713	-0.0244719	0.000947503	0.626034	-3.30567	FAM192A	16449			FAM192A (+35262)	NLRC5 (+133728)	71.1653	3.0477	69.0793	3.43676
	584	cg04977602	chr 5: 35230728	-0.0304303	0.00514251	0.791244	-2.79797	PRLR	95	PRLR;PRLR	1stExon;5'UTR	PRLR (+94)		36.6103	4.62591	33.8721	4.31094
	585	cg14653284	chr 2: 11679879	0.0310374	0.0053721	0.791244	2.78383	GREB1	-200	GREB1;GREB1	5'UTR;TSS200	GREB1 (+5638)	NTSR2 (+130449)	54.2772	4.61449	57.6197	5.83179
	586	cg22298265	chr 8: 975286	0.0336904	0.00608611	0.800565	2.74311	BC038783	142089			C8orf42 (-479956)	DLGAP2 (-474282)	59.3303	5.6236	63.5477	5.04869
	587	cg21167587	chr 9: 36397390	-0.0373598	0.00667015	0.805162	-2.71288	RNF38	2906	RNF38;RNF38;RNF38;RNF38;RNF38	5'UTR;5'UTR;Body;5'UTR;Body	GNE (-120338)	RNF38 (+2905)	58.9947	6.17776	55.9341	6.76953
	588	cg12509712	chr 17: 66270134	-0.0287416	0.00436237	0.778201	-2.8507	ARSG	14812	ARSG;SLC16A6	5'UTR;Body	ARSG (+14812)	SLC16A6 (+17270)	69.3119	5.51529	66.3336	4.97693
	589	cg13800949	chr 7: 47343103	-0.0244707	0.000978431	0.627222	-3.29666	AK310472	-25727	TNS3	Body	TNS3 (+278638)		69.736	3.15855	67.6654	3.65436
	590	cg14516100	chr 4: 186560083	-0.0376595	0.00673267	0.805162	-2.70979	SORBS2	18040	SORBS2;SORBS2;SORBS2;SORBS2;SORBS2;SORBS2;SORBS2;SORBS2	Body;Body;Body;Body;Body;Body;Body;Body	PDLIM3 (-103372)	SORBS2 (+45916)	61.2678	8.34898	56.1798	9.82262
	591	cg14837148	chr 15: 68810195	-0.0275987	0.00372747	0.762801	-2.90035	CORO2B	-61112			CORO2B (-98683)	ITGA11 (-85704)	60.4275	3.22476	58.0765	5.56262
	592	cg15165927	chr 5: 1033518	-0.0252265	0.00179366	0.68697	-3.12243	NKD2	24351	NKD2	Body	NKD2 (+24351)	SLC12A7 (+78653)	71.1482	3.10159	68.7781	4.92445
	593	cg00457087	chr 1: 162602295	0.0265902	0.00303181	0.74474	2.96449	DDR2	68	DDR2;DDR2;DDR2;DDR2	1stExon;1stExon;5'UTR;5'UTR	DDR2 (+68)		33.0205	4.69038	36.2682	5.00185
	594	cg24207161	chr 6: 155464712	-0.0404023	0.00698262	0.805162	-2.69767	TIAM2	-4531	TIAM2	Body	CLDN20 (-120434)	TIAM2 (+53290)	61.5617	6.38293	55.9863	9.41542
	595	cg10545250	chr 15: 89454587	-0.0259085	0.00239358	0.71839	-3.03648	MFGE8	1168	MFGE8;MFGE8	Body;Body	HAPLN3 (-15818)	MFGE8 (+2075)	71.8518	4.26133	69.9383	4.06431
	596	cg24375399	chr 17: 40825798	-0.0343392	0.00630527	0.800713	-2.73147	PLEKHH3	2310	PLEKHH3	Body	PLEKHH3 (+3249)	TUBG2 (+14533)	25.8298	6.31634	21.6435	5.02266
	597	cg12493494	chr 11: 118885541	0.0252337	0.00180878	0.68713	3.11996	RPS25	3516	CCDC84	Body	TRAPPC4 (-3699)	RPS25 (+3515)	71.3888	4.07403	74.3101	3.51507
	598	cg17658341	chr 11: 14043404	-0.0250669	0.0016544	0.686761	-3.14614	SPON1	59221	SPON1	Body	SPON1 (+59221)	RRAS2 (+337325)	68.9335	2.32961	66.8037	3.99428
	599	cg07088513	chr 3: 48232722	0.0288448	0.00452274	0.778556	2.8392	CDC25A	-2921			CDC25A (-2922)		63.2259	5.39149	67.0007	4.27855
	600	cg08027199	chr 2: 145090856	0.0285806	0.00442409	0.778556	2.84622	GTDC1	-773	GTDC1	TSS1500	GTDC1 (-774)		46.4081	5.54318	50.8184	6.04491
	601	cg18281102	chr 2: 44065550	0.0238336	0.000465518	0.564431	3.49985	ABCG5	408	ABCG5;ABCG8	Body;TSS1500	ABCG8 (-552)	ABCG5 (+407)	72.285	3.36254	74.6917	2.32327
	602	cg19850463	chr 10: 4868005	0.0332985	0.00616417	0.800713	2.73892	AKR1E2	-396	AKR1E2	TSS1500	AKR1E2 (-396)		68.4728	5.64664	72.5873	5.2286
	603	cg05642923	chr 17: 61896912	-0.0284057	0.00435019	0.778201	-2.85158	DDX42	4012	FTSJ3	3'UTR	PSMC5 (-7857)	DDX42 (+45346)	41.0265	3.60168	38.6479	4.62721
	604	cg19062478	chr 4: 1235416	-0.0249887	0.00165493	0.686761	-3.14605	CTBP1	295	CTBP1;CTBP1	Body;5'UTR	SPON2 (-68760)	CTBP1 (+7491)	78.3273	3.43538	76.2925	3.2719
	605	cg22992125	chr 8: 37693980	0.0263158	0.0029104	0.740278	2.97705	BRF2	13451	GPR124	Body	BRF2 (+13450)	GPR124 (+39580)	71.8079	4.60089	74.5918	4.20996
	606	cg07952182	chr 1: 162647028	-0.0283613	0.00437054	0.778201	-2.8501	DDR2	44801	DDR2;DDR2	5'UTR;5'UTR	HSD17B7 (-113467)	DDR2 (+44801)	46.6907	4.34493	44.7289	4.8864
	607	cg05895034	chr 16: 2908892	0.0352343	0.00665178	0.805162	2.71379	PRSS22	-721	PRSS22	TSS1500	PRSS22 (-722)		36.4885	6.19813	39.9363	6.57144
	608	cg14166948	chr 1: 1099563	0.0375589	0.00690977	0.805162	2.70116	MIR200B	-2920			C1orf159 (-47828)	TTLL10 (-9722)	66.4416	5.58541	70.4978	6.194
	609	cg04353660	chr 12: 123471054	0.0248834	0.00161399	0.686524	3.15337	ARL6IP4	5379	PITPNM2	Body	ARL6IP4 (+6175)	PITPNM2 (+123980)	76.2154	4.57815	79.5011	4.62196
	610	cg14702390	chr 18: 9917748	0.0267004	0.00328381	0.750889	2.93984	VAPA	3794	VAPA;VAPA	Body;Body	APCDD1 (-536876)	VAPA (+3794)	54.2754	3.86936	57.7379	4.29729
	611	cg11805311	chr 10: 88728073	-0.0295156	0.00502663	0.789773	-2.80532	C10orf116	-114	C10orf116	TSS200	AGAP11 (-2424)	C10orf116 (-114)	30.9684	4.42656	28.0527	4.67966
	612	cg04869514	chr 16: 87705841	0.0240433	0.000803124	0.617602	3.35172	FLJ00104	29489	JPH3	Body	JPH3 (+69343)	SLC7A5 (+197258)	67.5813	3.97616	70.5592	2.69367
	613	cg13186559	chr 10: 80854035	0.0245989	0.00133696	0.663403	3.20793	ZMIZ1	25244	ZMIZ1	5'UTR	PPIF (-253184)	ZMIZ1 (+25244)	19.9352	3.62226	22.4727	3.52567
	614	cg04955333	chr 7: 2647414	0.0241478	0.000906803	0.621916	3.31795	TTYH3	-24188	IQCE;IQCE	Body;Body	TTYH3 (-24188)	IQCE (+48783)	71.6566	4.49578	73.7304	3.65819
	615	cg06398474	chr 2: 240291509	-0.0348458	0.00662372	0.805162	-2.71519	MIR2467	-18010	HDAC4	5'UTR	HDAC4 (+31133)	TWIST2 (+534837)	39.267	5.51327	36.349	6.17579
	616	cg21434081	chr 4: 25511306	-0.0257912	0.00246717	0.72055	-3.02734	ANAPC4	96767			SLC34A2 (-146128)	ANAPC4 (+132459)	55.2284	5.00386	53.6344	4.67747
	617	cg06852461	chr 1: 207975182	-0.023496	0.00017051	0.431973	-3.75912	MIR29C	686			CD46 (+49800)	CD34 (+109500)	22.75	3.64224	20.444	4.62869
	618	cg02483043	chr 10: 134536498	0.0340987	0.00647	0.805162	2.72296	NKX6-2	63039	INPP5A	Body	NKX6-2 (+63038)	INPP5A (+185146)	66.6966	6.85951	69.9636	5.51448
	619	cg20358011	chr 11: 126581947	-0.0339393	0.00644635	0.804728	-2.72417	DJ031150	59251	KIRREL3;KIRREL3	Body;Body	KIRREL3 (+288818)	ST3GAL4 (+356408)	42.7728	6.0262	39.8945	7.41414
	620	cg10579408	chr 7: 86850525	-0.0474991	0.00749032	0.810328	-2.67422	C7orf23	-1494	C7orf23	TSS1500	C7orf23 (-1495)		20.7682	9.3811	16.0669	5.4533
	621	cg21288507	chr 1: 14078744	-0.0270074	0.00356245	0.752226	-2.91451	PRDM2	2889	PRDM2;PRDM2;PRDM2;PRDM2	Body;Body;5'UTR;Body	KAZN (-846468)	PRDM2 (+47395)	49.2866	6.34304	48.008	6.76939
	622	cg08698943	chr 10: 3509758	-0.0267559	0.00339302	0.752132	-2.92969	BC037918	148872			PITRM1 (-294726)	KLF6 (+317714)	38.8699	5.21933	36.1099	5.44836
	623	cg02662828	chr 4: 48492848	-0.0309746	0.00569797	0.798457	-2.76467	ZAR1	540	ZAR1	1stExon	ZAR1 (+540)		27.1958	5.15785	24.4239	5.22353
	624	cg10082647	chr 12: 107348855	0.046478	0.00748765	0.810328	2.67434	AK055712	420	C12orf23	TSS1500	C12orf23 (-688)		24.4846	7.34285	30.5425	7.77809
	625	cg17901038	chr 17: 74385781	0.0259105	0.0026841	0.733322	3.00178	SPHK1	4493	UBE2O	3'UTR	SPHK1 (+5092)	UBE2O (+63506)	71.0975	4.47713	73.5656	3.39725
	626	cg04781305	chr 10: 35624429	-0.0295991	0.00518955	0.791244	-2.79503	CCNY	-1372	CCNY;CCNY	TSS1500;5'UTR	CCNY (-1372)		38.4475	4.39363	35.8485	4.84726
	627	cg02230593	chr 10: 119293083	-0.0330399	0.0063054	0.800713	-2.73146	EMX2OS	8841	EMX2OS	Body	PDZD8 (-158147)	EMX2 (-8872)	53.537	6.02694	50.1963	7.6016
	628	cg03610228	chr 10: 21799395	-0.0320905	0.00609234	0.800565	-2.74277	AK055656	-4544			NEBL (-612865)	C10orf140 (+7355)	24.5386	5.82029	22.0833	4.57275
	629	cg04063936	chr 16: 88810993	0.0376235	0.00704962	0.805162	2.69449	FLJ40448	1765	FAM38A	Body	CTU2 (+38103)	PIEZO1 (+40378)	54.2978	6.29049	58.4048	5.51873
	630	cg13266773	chr 8: 104310380	-0.026855	0.00354578	0.752226	-2.91598	FZD6	-280	FZD6;FZD6;FZD6	TSS1500;TSS1500;TSS1500	FZD6 (-280)		51.5153	4.63641	48.6624	4.17823
	631	cg21566086	chr 16: 28509314	0.0241213	0.000988755	0.627527	3.29371	APOBR	3345	APOB48R	Body	APOBR (+3345)	IL27 (+8840)	68.3753	3.73833	70.6388	3.8744
	632	cg14249155	chr 9: 124976040	-0.0235171	0.000288629	0.497501	-3.6253	LHX6	7979	LHX6;LHX6	Body;Body	NDUFA8 (-53943)	LHX6 (+15050)	28.157	3.30203	25.4423	2.7201
	633	cg01332054	chr 15: 74494861	0.0265095	0.00330682	0.750889	2.93768	STRA6	359	STRA6;STRA6;STRA6;STRA6;STRA6	5'UTR;5'UTR;5'UTR;5'UTR;5'UTR	STRA6 (+358)		46.2474	5.22925	48.5068	4.20387
	634	cg06113208	chr 6: 73328305	0.0242234	0.00109742	0.634339	3.26428	KCNQ5	-3265			KCNQ5 (-3265)		67.0706	3.60155	69.9436	3.38213
	635	cg17071948	chr 6: 29590143	-0.0250397	0.00196543	0.707341	-3.09541	GABBR1	5862	GABBR1;GABBR1;GABBR1	Body;Body;Body	GABBR1 (+10818)	OR2H2 (+34461)	58.665	3.50166	56.7017	3.89203
	636	cg23779626	chr 6: 33864747	0.0242679	0.00115321	0.644257	3.25021	LOC100507584	-63			MLN (-92955)	GRM4 (+236888)	53.6912	3.16085	55.8246	4.37842
	637	cg03764585	chr 1: 203320223	0.024052	0.000946861	0.626034	3.30586	FMOD	66	FMOD;FMOD	1stExon;5'UTR	FMOD (+65)		48.0808	4.2906	49.4537	4.1275
	638	cg16058274	chr 14: 94179847	-0.0304303	0.00563657	0.797914	-2.76821	PRIMA1	74919			PRIMA1 (+74918)	COX8C (+366311)	45.9112	5.35674	43.7412	6.71623
	639	cg00232092	chr 7: 5518887	0.0344415	0.00674153	0.805162	2.70935	MIR589	16661	FBXL18	3'UTR	TNRC18 (-55711)	FBXL18 (+34511)	56.7991	6.47948	60.2202	6.839
	640	cg22765612	chr 19: 5237246	0.0256111	0.00249078	0.722989	3.02446	PTPRS	48999	PTPRS;PTPRS;PTPRS;PTPRS	Body;Body;Body;Body	PTPRS (+103567)	KDM4B (+268123)	78.752	3.99871	81.5081	3.486
	641	cg13781989	chr 9: 134497566	-0.0251773	0.00215372	0.711211	-3.06817	RAPGEF1	-181	RAPGEF1;RAPGEF1	Body;Body	UCK1 (-90905)	RAPGEF1 (+87662)	73.9414	2.5534	72.5245	5.58752
	642	cg08733933	chr 1: 2954429	0.0250331	0.00200424	0.708241	3.0896	ACTRT2	16384			PRDM16 (-31312)	ACTRT2 (+16384)	70.1524	3.72137	72.5302	3.07855
	643	cg25401612	chr 12: 20009446	0.0257352	0.00268478	0.733322	3.0017	LOC100506393	-158172			PDE3A (-512732)	AEBP2 (+416839)	40.4283	4.14789	43.2915	4.79304
	644	cg05509534	chr 5: 14867414	-0.0278159	0.00436721	0.778201	-2.85034	ANKH	4473	ANKH	Body	ANKH (+4472)	TRIO (+723586)	65.4525	4.84788	63.9759	5.60179
	645	cg19379721	chr 19: 19737143	0.0237996	0.000773069	0.612929	3.36226	LPAR2	1896	LPAR2	Body	PBX4 (-7419)	LPAR2 (+1895)	69.3321	3.07596	71.2768	3.34352
	646	cg19702802	chr 19: 46417729	0.0351409	0.0069524	0.805162	2.69912	NANOS2	307	NANOS2	1stExon	NANOS2 (+306)		62.6801	4.81143	65.5851	6.3454
	647	cg17841545	chr 10: 115371055	-0.0245729	0.00163435	0.686524	-3.14971	NRAP	17725	NRAP;NRAP	Body;Body	NRAP (+52749)	HABP2 (+58278)	69.36	3.3218	67.1586	3.43227
	648	cg03562952	chr 5: 1499204	-0.0238237	0.000827352	0.619158	-3.34348	LPCAT1	24872	LPCAT1	Body	SLC6A3 (-53662)	LPCAT1 (+24871)	77.4421	2.96411	75.667	3.61645
	649	cg25388823	chr 4: 2361876	-0.0254154	0.00246044	0.720131	-3.02817	ZFYVE28	4728	ZFYVE28	Body	MXD4 (-98138)	ZFYVE28 (+58493)	81.2043	3.53894	79.2535	3.89323
	650	cg02937751	chr 10: 72358696	0.0263729	0.00336994	0.751843	2.93181	PRF1	3835	PRF1;PRF1	Body;Body	NODAL (-157232)	PRF1 (+3834)	84.1065	4.7126	86.5341	2.75905
	651	cg16803509	chr 12: 131941592	-0.0320824	0.00630786	0.800713	-2.73133	LOC338797	109578			SFSWAP (-254042)	GPR133 (+503141)	68.4062	5.68072	65.6513	4.29574
	652	cg14949892	chr 12: 133428309	0.0267332	0.00370303	0.760156	2.90241	GOLGA3	-22883	CHFR;CHFR;CHFR;CHFR;CHFR	Body;Body;Body;Body;Body	GOLGA3 (-23022)	CHFR (+35894)	69.2942	4.16995	71.9083	3.54344
	653	cg18787437	chr 1: 16499673	0.0252284	0.00233842	0.712495	3.0435	EPHA2	-17091			EPHA2 (-17092)	ARHGEF19 (+39430)	63.2427	5.05521	64.3595	5.46717
	654	cg17892917	chr 3: 107823424	-0.0267722	0.00380907	0.767597	-2.89356	CD47	-13489			CD47 (-13490)	IFT57 (+117992)	53.8278	4.9175	50.9504	4.47869
	655	cg05212664	chr 14: 24639769	0.0252311	0.00236115	0.714289	3.04059	REC8	-1464	REC8;REC8	TSS1500;TSS1500	REC8 (-1464)		72.5475	3.5134	75.0531	3.36634
	656	cg20874044	chr 12: 102874832	0.025093	0.00230804	0.712495	3.04743	IGF1	-454	IGF1;IGF1;IGF1	TSS1500;TSS1500;TSS1500	IGF1 (-455)		52.5253	3.75266	54.6696	3.86473
	657	cg24577417	chr 6: 168378559	-0.0248917	0.00210493	0.709802	-3.07501	HGC6.3	-940	HGC6.3	TSS1500	HGC6.3 (-941)		83.6357	3.78704	81.5703	3.3955
	658	cg16210248	chr 5: 1973774	0.0290334	0.00531959	0.791244	2.78702	IRX4	-90894			IRX4 (-90895)	IRX2 (+777994)	37.8456	5.58691	41.4385	7.42777
	659	cg11964461	chr 5: 179606623	0.0260219	0.0032147	0.74821	2.94643	RASGEF1C	29507	RASGEF1C	5'UTR	RNF130 (-107515)	RASGEF1C (+29506)	54.6107	4.551	57.9139	4.21369
	660	cg20074340	chr 13: 113651420	0.0303536	0.00596681	0.800286	2.7496	MCF2L	-4607	MCF2L;MCF2L	Body;Body	F7 (-108684)	MCF2L (+27886)	44.6878	5.61624	48.605	6.14501
	661	cg07210466	chr 3: 33444388	-0.0283547	0.0049678	0.78914	-2.80911	UBP1	37482	UBP1;UBP1;UBP1	Body;Body;Body	UBP1 (+37508)	FBXL2 (+125455)	67.1214	4.34582	64.7739	5.07109
	662	cg23389785	chr 6: 157892722	-0.0262814	0.00345636	0.752226	-2.92394	MIR3692	-57441	ZDHHC14;ZDHHC14	Body;Body	SNX9 (-351571)	ZDHHC14 (+90166)	55.6499	4.17922	53.9952	5.23467
	663	cg20658635	chr 15: 26877820	0.02685	0.00400925	0.77173	2.87743	GABRB3	-3583	GABRB3;GABRB3	Body;Body	ATP10A (-769472)	GABRB3 (+140402)	41.8182	4.1072	45.3702	4.37154
	664	cg08080038	chr 3: 61655044	-0.0251035	0.00240516	0.71839	-3.03502	PTPRG	107802	PTPRG	Body	PTPRG (+107802)	FEZF2 (+704145)	46.6866	4.1303	44.8108	4.84192
	665	cg21944455	chr 17: 42994269	-0.02296	1.67393e-05	0.243774	-4.30446	GFAP	-1349	GFAP;GFAP	TSS1500;TSS1500	GFAP (-1350)		45.3765	4.02027	43.6375	4.94779
	666	cg08645225	chr 7: 779089	-0.0319921	0.00658933	0.805162	-2.71692	PRKAR1B	-11776	HEATR2	Body	SUN1 (-93052)	PRKAR1B (-11777)	81.7148	4.50467	79.3654	5.53154
	667	cg10524161	chr 12: 132407477	-0.0250196	0.00233765	0.712495	-3.0436	PUS1	-6267	ULK1	3'UTR	PUS1 (-6335)	ULK1 (+28199)	72.8098	3.16199	70.8641	3.91141
	668	cg05049980	chr 2: 46612798	-0.0272821	0.00441523	0.778556	-2.84686	EPAS1	5960	EPAS1	3'UTR	LOC388946 (-93905)	EPAS1 (+88258)	67.2326	5.39714	66.1548	6.51473
	669	cg05598010	chr 1: 1261797	0.0255227	0.00287613	0.740278	2.98068	GLTPD1	1655	GLTPD1	5'UTR	TAS1R3 (-4928)	CPSF3L (-1752)	57.3574	4.39736	60.1348	3.45922
	670	cg14047153	chr 5: 1093797	-0.0233516	0.000553876	0.570305	-3.45325	SLC12A7	18375	SLC12A7	Body	SLC12A7 (+18374)	NKD2 (+84630)	79.2526	4.60154	77.8453	4.26093
	671	cg26384993	chr 14: 73279458	-0.034895	0.00729524	0.807741	-2.68306	DPF3	81351	DPF3	Body	DPF3 (+81350)	RGS6 (+880303)	48.0156	5.68403	45.4588	6.36401
	672	cg12175883	chr 10: 119449252	-0.0284995	0.00524687	0.791244	-2.79147	EMX2OS	-144673			EMX2 (+147297)	RAB11FIP2 (+356861)	47.2188	5.07877	45.1632	6.0762
	673	cg25509697	chr 3: 138666732	0.0307025	0.00629531	0.800713	2.73199	AK304483	279	FOXL2;C3orf72	TSS1500;Body	FOXL2 (-751)		51.6182	5.28638	54.4631	4.65412
	674	cg01664108	chr 5: 1005570	0.0251102	0.00261193	0.731561	3.01006	NKD2	-3597			NKD2 (-3597)		51.8564	3.63962	53.9444	3.63878
	675	cg08136809	chr 19: 41882642	-0.0287508	0.00539655	0.791244	-2.78236	TMEM91	205	TMEM91;TMEM91;TMEM91;TMEM91;TMEM91;TMEM91;TMEM91;TMEM91;TMEM91;TMEM91	1stExon;1stExon;5'UTR;1stExon;5'UTR;TSS1500;5'UTR;5'UTR;1stExon;5'UTR	B9D2 (-12565)	EXOSC5 (+20613)	10.4419	5.67915	7.85214	2.78276
	676	cg23489038	chr 12: 111619190	-0.0310634	0.00645924	0.805162	-2.72351	CUX2	81870	CUX2	Body	CUX2 (+147363)	FAM109A (+187734)	33.5477	5.56151	30.0725	4.2124
	677	cg04099095	chr 7: 27278570	0.0257688	0.00322156	0.748448	2.94577	EVX1	-3593			EVX1 (-3593)		60.8687	3.92695	63.3959	3.87516
	678	cg27122441	chr 22: 18260411	-0.0317945	0.0067113	0.805162	-2.71084	BID	-2980			BID (-2981)		50.9756	5.41782	47.3331	5.70831
	679	cg09042458	chr 1: 9822759	0.0258874	0.00334093	0.750889	2.93449	CLSTN1	-29155	CLSTN1;CLSTN1	Body;Body	CLSTN1 (+61790)	PIK3CD (+110970)	70.0233	4.42578	73.3849	3.7635
	680	cg24115571	chr 8: 104310713	-0.023983	0.00142923	0.668462	-3.18868	FZD6	53	FZD6;FZD6;FZD6;FZD6	TSS1500;TSS1500;5'UTR;1stExon	FZD6 (+53)		21.7573	4.25936	19.1717	3.89317
	681	cg04165004	chr 16: 17299953	0.029883	0.00601901	0.800286	2.74674	AX747757	132763	XYLT1	Body	XYLT1 (+264784)	NPIP (+818356)	39.2781	4.6994	41.4426	5.94635
	682	cg00036976	chr 16: 85343281	-0.0238264	0.00125759	0.660662	-3.22549	LOC727710	-6279			KIAA0182 (-303642)	KIAA0513 (+281872)	22.9954	3.54001	21.0597	3.7559
	683	cg14090201	chr 4: 40428121	0.0264578	0.00396184	0.77173	2.88118	MIR4802	76015	RBM47;RBM47	Body;Body	CHRNA9 (+90653)	RBM47 (+203761)	72.9003	4.49567	75.3191	3.40506
	684	cg04889800	chr 1: 16163555	-0.0494928	0.00843395	0.821829	-2.63418	SPEN	-10803	FLJ37453	Body	UQCRHL (-29362)	SPEN (-10803)	47.3013	9.71555	40.9999	7.15284
	685	cg17036427	chr 15: 65689325	-0.0288224	0.00553568	0.794918	-2.77409	IGDCC4	-558	IGDCC4	Body	IGDCC3 (-18948)	IGDCC4 (+26084)	53.5462	4.26014	50.8626	5.30657
	686	cg14327393	chr 9: 75141633	-0.0285331	0.00538175	0.791244	-2.78325	TMC1	4917	TMC1	5'UTR	TMC1 (+4917)	ALDH1A1 (+426599)	43.1748	4.54055	40.6173	4.25396
	687	cg07748741	chr 10: 99330056	-0.0283795	0.00531947	0.791244	-2.78702	ANKRD2	-2199	UBTD1	Body	ANKRD2 (-2199)		69.6364	3.95266	67.1227	4.54334
	688	cg07309864	chr 17: 73238441	0.0291241	0.00573709	0.799203	2.76244	NUP85	14186	GGA3;GGA3	Body;Body	GGA3 (+19265)	NUP85 (+36845)	71.9611	5.52727	74.5294	3.74167
	689	cg02185248	chr 17: 78748494	-0.0408959	0.00807907	0.815041	-2.64875	RPTOR	-174741	RPTOR;RPTOR	Body;Body	CHMP6 (-217146)	RPTOR (+229870)	63.9885	7.48811	60.5222	6.58693
	690	cg08003402	chr 3: 15311021	-0.0281614	0.00521575	0.791244	-2.7934	AL133111	15331	SH3BP5;SH3BP5	Body;Body	SH3BP5 (+63082)	CAPN7 (+63289)	30.2991	5.42955	27.3787	4.15987
	691	cg21406402	chr 2: 121223847	0.0241332	0.00170641	0.68697	3.13708	LOC84931	78	LOC84931	Body	GLI2 (-331019)	INHBB (+120129)	51.0212	3.89767	53.1464	4.78504
	692	cg20519225	chr 11: 67765204	0.0315205	0.00675591	0.805162	2.70864	UNC93B1	6389	UNC93B1	Body	ALDH3B2 (-316520)	UNC93B1 (+6388)	73.4286	5.45567	75.8239	4.61691
	693	cg02961798	chr 16: 67687392	0.0403732	0.00811847	0.815168	2.6471	DL491203	502	RLTPR	Body	ACD (+7325)	CTCF (+91083)	35.1218	7.68765	40.6552	6.68773
	694	cg18951352	chr 6: 149806077	-0.025717	0.00333233	0.750889	-2.93529	ZC3H12D	71	ZC3H12D;ZC3H12D	5'UTR;1stExon	ZC3H12D (+70)		55.99	7.05866	52.1923	7.0246
	695	cg03877767	chr 2: 11680057	0.0296477	0.006079	0.800565	2.74349	GREB1	-22	GREB1;GREB1	5'UTR;TSS200	GREB1 (+5816)	NTSR2 (+130271)	31.832	4.6461	34.368	4.76053
	696	cg02478349	chr 5: 179499824	-0.0345869	0.00750624	0.810607	-2.67351	RNF130	-715	RNF130	TSS1500	RNF130 (-716)		77.5045	5.36393	74.606	5.77551
	697	cg11617821	chr 4: 75672135	0.0234327	0.000874945	0.621916	3.32793	BTC	47747	BTC	3'UTR	BTC (+47746)	AREG (+361283)	62.4647	3.14069	64.4243	3.95032
	698	cg16692090	chr 4: 25867290	0.0259852	0.00359742	0.752469	2.91146	SEL1L3	-2680			SEL1L3 (-2681)		66.7654	3.96385	69.4906	3.82466
	699	cg13477614	chr 17: 79396462	-0.0242145	0.00184923	0.693856	-3.11344	BAHCC1	-14372	BAHCC1	Body	BAHCC1 (+22923)	ACTG1 (+83429)	51.3232	3.54817	48.1518	3.70035
	700	cg02470871	chr 3: 119278637	0.0263352	0.0040027	0.77173	2.87795	CD80	-156	CD80	TSS200	CD80 (-157)		47.6547	5.27359	48.9932	5.10565
	701	cg17533927	chr 7: 128550898	0.0300915	0.00627771	0.800713	2.73291	KCP	-125	KCP;KCP	TSS200;TSS200	KCP (-126)		55.5562	5.34043	58.2716	4.8228
	702	cg00594040	chr 2: 8422258	-0.0309796	0.00667809	0.805162	-2.71248	LINC00299	46291			ID2 (-399854)		67.1025	5.46286	65.0334	6.39859
	703	cg10734044	chr 3: 16245632	0.0263526	0.00403712	0.77173	2.87525	GALNTL2	-12650	GALNTL2	Body	GALNTL2 (+29449)	DPH3 (+60863)	46.5501	5.20411	49.4041	4.13963
	704	cg20925954	chr 10: 112256640	0.0229714	0.000333583	0.530483	3.58772	DUSP5	-984	DUSP5	TSS1500	DUSP5 (-984)		18.833	2.48192	21.4078	3.80907
	705	cg03716125	chr 2: 208541770	0.0299821	0.00626215	0.800713	2.73373	Y_RNA	-10913			METTL21A (-51798)	CCNYL1 (-34493)	31.5035	4.62349	34.8708	4.49312
	706	cg10429573	chr 2: 240746616	0.0260368	0.00379979	0.767597	2.89432	LOC150935	62063			HDAC4 (-423974)	NDUFA10 (+218202)	74.6538	4.58863	77.1081	3.13038
	707	cg21831174	chr 3: 187011187	-0.0269021	0.00456764	0.778556	-2.83604	MASP1	-1377	MASP1;MASP1;MASP1	TSS1500;TSS1500;TSS1500	MASP1 (-1378)		53.5619	4.23461	51.7608	5.11637
	708	cg05874348	chr 17: 48348086	0.0226717	4.97518e-05	0.347487	4.05679	TMEM92	-680	TMEM92	TSS1500	TMEM92 (-680)		41.9616	4.88096	44.7553	4.7687
	709	cg00574412	chr 17: 27892866	0.0261681	0.00396246	0.77173	2.88113	ABHD15	1176	ABHD15	Body	TP53I13 (-2872)	ABHD15 (+1175)	61.2126	3.9866	63.3761	3.58318
	710	cg14192188	chr 9: 135586036	-0.0297577	0.00625846	0.800713	-2.73392	DDX31	-40248			DDX31 (-40249)	AK8 (+168161)	64.8409	6.72811	62.5946	7.3199
	711	cg18833933	chr 12: 133185615	0.0279092	0.00531014	0.791244	2.78759	LOC100507055	1422			GALNT9 (-279711)	P2RX2 (-9787)	55.3094	4.26772	57.8599	4.82814
	712	cg01835620	chr 17: 4807758	-0.0225894	2.94964e-06	0.118211	-4.6743	CHRNE	-1389	CHRNE	TSS1500	CHRNE (-1390)		67.3069	2.23718	64.8993	2.70927
	713	cg12895207	chr 13: 112575376	-0.0266856	0.00444815	0.778556	-2.8445	SOX1	-146536			SOX1 (-146536)	C13orf16 (+602362)	46.5999	5.07915	43.3687	4.93009
	714	cg07139026	chr 1: 212786822	0.0252076	0.00310682	0.74821	2.95697	ATF3	-1537	ATF3;ATF3;ATF3	5'UTR;5'UTR;5'UTR	ATF3 (+4853)	BATF3 (+86504)	69.6162	4.32625	72.4914	4.06269
	715	cg01017463	chr 14: 69255808	-0.0234932	0.00108927	0.634339	-3.26639	ZFP36L1	4823	ZFP36L1	3'UTR	ZFP36L1 (+7151)	RAD51B (+969313)	36.7796	3.52699	33.7451	3.20923
	716	cg13963053	chr 6: 170540050	-0.0311349	0.00687944	0.805162	-2.70262	LOC154449	31607			DLL1 (+59646)	C6orf70 (+388330)	69.5583	5.24642	67.4393	5.56793
	717	cg24632944	chr 3: 13664715	0.0263619	0.00418935	0.771755	2.86354	BC152380	-11181	FBLN2;FBLN2;FBLN2	Body;Body;Body	FBLN2 (+74091)	WNT7A (+256902)	33.2012	3.66888	35.1832	4.43507
	718	cg00530805	chr 20: 49545062	0.0251762	0.00312208	0.74821	2.95546	ADNP	2465	ADNP;ADNP	5'UTR;5'UTR	ADNP (+2464)	BCAS4 (+133596)	28.4454	3.84169	30.9309	3.67027
	719	cg11690578	chr 17: 4510827	-0.0347981	0.0077601	0.812261	-2.66233	BC043554	-2916	SMTNL2;SMTNL2	3'UTR;3'UTR	GGT6 (-46952)	ALOX15 (+34143)	53.3778	5.86311	50.555	6.77897
	720	cg05584361	chr 11: 1481525	-0.0289932	0.00601233	0.800286	-2.74711	BRSK2	9709	BRSK2	Body	MOB2 (+20589)	BRSK2 (+70397)	61.7515	4.62763	59.7763	5.65633
	721	cg27269148	chr 13: 113735331	0.0277982	0.00532325	0.791244	2.78679	F7	-24773	MCF2L;MCF2L	Body;Body	F7 (-24773)	MCF2L (+111797)	70.6634	3.76559	73.8306	4.43051
	722	cg25110106	chr 1: 110167983	-0.0250371	0.00296301	0.741216	-2.97155	AMPD2	-65	AMPD2;AMPD2;AMPD2	TSS200;Body;Body	GSTM4 (-30714)	AMPD2 (+4708)	76.6565	3.44796	74.7706	4.22292
	723	cg23731742	chr 1: 879958	0.0249366	0.00287278	0.740278	2.98103	SAMD11	8807	NOC2L;SAMD11	3'UTR;3'UTR	NOC2L (+14720)	SAMD11 (+18838)	38.9472	4.366	41.5991	3.91074
	724	cg26267561	chr 20: 3052224	-0.0284331	0.00570929	0.798457	-2.76403	OXT	-41	OXT	TSS200	OXT (-41)		67.2545	3.90828	63.7851	5.8289
	725	cg03680517	chr 10: 43632967	-0.0310077	0.00690594	0.805162	-2.70135	CSGALNACT2	-966	CSGALNACT2	TSS1500	CSGALNACT2 (-966)		28.9101	5.58268	26.7035	4.85828
	726	cg11264947	chr 5: 177980944	0.0231859	0.000772208	0.612929	3.36257	COL23A1	36612	COL23A1	Body	AGXT2L2 (-321142)	COL23A1 (+36611)	54.3551	2.75226	57.3026	4.10818
	727	cg18110590	chr 13: 113636679	0.0310686	0.00692654	0.805162	2.70036	MCF2L	2698	MCF2L;MCF2L	Body;Body	F7 (-123425)	MCF2L (+13145)	51.9772	5.99936	56.713	6.28459
	728	cg03133735	chr 4: 111562270	-0.0255857	0.00351576	0.752226	-2.91863	PITX2	1009			PITX2 (+1008)	ENPEP (+165042)	27.4957	3.42723	24.9991	3.81327
	729	cg14293575	chr 22: 18635460	0.0229405	0.000485529	0.566273	3.48862	USP18	2703	USP18	5'UTR	DGCR6 (-258275)	USP18 (+2703)	80.054	3.17911	82.3615	2.263
	730	cg22379862	chr 12: 1904502	0.0233178	0.00100072	0.627527	3.29032	CACNA2D4	16387	CACNA2D4	Body	LRTM2 (-24930)	ADIPOR2 (+104256)	68.8201	2.80986	71.2843	3.52884
	731	cg22637538	chr 17: 7348327	-0.0232652	0.000907758	0.621916	-3.31766	CHRNB1	-78	CHRNB1	TSS200	CHRNB1 (-78)		15.2023	3.94866	13.0345	2.48857
	732	cg15261665	chr 3: 46506374	-0.0230862	0.000683916	0.593452	-3.39595	LTF	224	LTF;LTF	5'UTR;1stExon	LTF (+223)		27.528	3.36455	25.1054	2.73565
	733	cg01655958	chr 14: 73709663	-0.0254938	0.00348262	0.752226	-2.92158	BC044305	3024	PAPLN	Body	PAPLN (+5459)	NUMB (+215622)	75.5189	4.4782	72.9419	4.53029
	734	cg03767807	chr 16: 1764432	-0.0336149	0.0076872	0.812261	-2.66551	MAPK8IP3	8212	MAPK8IP3;MAPK8IP3	Body;Body	MAPK8IP3 (+8212)	NME3 (+57277)	62.4013	4.06111	59.308	6.03876
	735	cg19501190	chr 11: 73021274	-0.0402308	0.00857624	0.823733	-2.6285	ARHGEF17	1612	ARHGEF17	1stExon	RELT (-66130)	ARHGEF17 (+1612)	65.2745	6.8301	62.1101	7.86414
	736	cg19945263	chr 6: 14706041	0.0235315	0.00131566	0.661086	3.21254	JARID2	-539692			JARID2 (-540485)	CD83 (+588177)	71.1535	3.73589	73.4741	4.18812
	737	cg19631779	chr 15: 63339148	0.0232486	0.000926402	0.621916	3.31197	TPM1	-1487	TPM1;TPM1;TPM1;TPM1;TPM1;TPM1;TPM1	Body;Body;Body;TSS1500;Body;Body;Body	AX747619 (+2437)	TPM1 (+4311)	75.1304	4.61024	77.6786	3.48885
	738	cg17240135	chr 2: 112898493	0.0433754	0.00878608	0.824446	2.62027	FBLN7	2532	FBLN7;FBLN7	Body;Body	FBLN7 (+2532)	ZC3H8 (+114170)	58.8203	8.45072	64.4716	7.45569
	739	cg07700233	chr 4: 39171231	-0.0310859	0.00702332	0.805162	-2.69574	WDR19	-12792			WDR19 (-12792)	KLHL5 (+124781)	47.7717	4.41962	43.9501	5.09572
	740	cg09203501	chr 7: 5271545	-0.0262216	0.00426823	0.774623	-2.85763	WIPI2	17646	WIPI2;WIPI2;WIPI2;WIPI2;WIPI2	3'UTR;3'UTR;3'UTR;3'UTR;3'UTR	SLC29A4 (-51015)	WIPI2 (+41711)	60.1601	3.86857	57.3638	4.77155
	741	cg17226446	chr 4: 154408845	0.0260527	0.00411475	0.77173	2.86923	KIAA0922	21348	KIAA0922;KIAA0922	Body;Body	TLR2 (-196595)	KIAA0922 (+21348)	38.1858	3.36011	40.6928	4.09153
	742	cg08508455	chr 11: 470429	0.026066	0.00412497	0.77173	2.86844	PTDSS2	20150	PTDSS2	Body	PTDSS2 (+20150)	RNH1 (+36391)	39.2228	4.34278	42.1101	3.91046
	743	cg00162806	chr 10: 135051929	0.0230362	0.000682819	0.593452	3.39639	VENTX	522	VENTX	Body	VENTX (+522)		33.3858	3.35055	35.8459	3.09547
	744	cg18395150	chr 1: 4728842	0.0235528	0.00139563	0.666224	3.19555	AJAP1	13738	AJAP1;AJAP1	Body;Body	AJAP1 (+13738)		58.3281	3.66044	60.3142	3.45303
	745	cg14854315	chr 12: 109246503	-0.026701	0.00474008	0.782298	-2.82419	SSH1	4856	SSH1;SSH1	Body;Body	CORO1C (-121209)	SSH1 (+4855)	60.5327	3.65409	58.5859	4.82144
	746	cg12955069	chr 16: 58593852	0.0245739	0.00264624	0.732389	3.0061	SNORA50	-17	CNOT1;SNORA50;CNOT1	Body;TSS200;Body	SETD6 (+44470)	CNOT1 (+69897)	62.2658	4.13995	65.5021	4.07033
	747	cg21753652	chr 2: 45981098	-0.0363015	0.00824696	0.819407	-2.64179	TRNA_Pseudo	-43585	PRKCE	Body	EPAS1 (-543442)	PRKCE (+102056)	64.2033	7.52637	60.8393	4.53004
	748	cg12905252	chr 1: 3028813	-0.0296061	0.0065564	0.805162	-2.71857	MIR4251	-15725	PRDM16;PRDM16	Body;Body	ARHGEF16 (-342333)	PRDM16 (+43072)	77.7604	5.32272	74.9992	4.86742
	749	cg16030878	chr 17: 77914307	-0.0247616	0.00289354	0.740278	-2.97883	AK097283	-2030	TBC1D16	3'UTR	CBX4 (-101095)	TBC1D16 (+95339)	68.7824	3.47546	66.5794	3.90089
	750	cg12884551	chr 5: 1673208	-0.0303223	0.006852	0.805162	-2.70395	MIR4277	35775			LPCAT1 (-149133)	MRPL36 (+126747)	68.4048	5.00039	65.4055	6.11446
	751	cg05265703	chr 3: 137787902	-0.0281443	0.00577453	0.800286	-2.76032	DZIP1L	44420	DZIP1L;DZIP1L	Body;3'UTR	DZIP1L (+46548)	CLDN18 (+70245)	46.6127	5.06871	45.2379	5.19765
	752	cg20711218	chr 20: 51110021	0.0226108	0.000198381	0.439333	3.72107	TRNA_Pseudo	108394			TSHZ2 (-478924)	ZFP64 (-301498)	61.8315	3.46501	62.8032	4.04726
	753	cg05784148	chr 6: 169586506	-0.0260454	0.00417509	0.771755	-2.86462	AF086258	-3671			THBS2 (+67630)	SMOC2 (+744676)	83.7641	4.08446	81.6908	4.62913
	754	cg23218895	chr 17: 43246883	0.0249725	0.00315727	0.74821	2.952	HEXIM2	1969	HEXIM2	Body	FMNL1 (-52408)	HEXIM2 (+8620)	77.0342	3.20312	79.7591	3.80605
	755	cg06413196	chr 7: 640338	-0.0328084	0.00762154	0.811439	-2.66839	PRKAR1B	883	PRKAR1B;PRKAR1B;PRKAR1B;PRKAR1B;PRKAR1B;PRKAR1B	Body;Body;Body;Body;Body;Body	HEATR2 (-125999)	PDGFA (-80858)	66.2599	6.20612	64.8255	7.10216
	756	cg18123753	chr 17: 20905787	-0.0336385	0.00784678	0.814308	-2.65859	USP22	40565	USP22	3'UTR	USP22 (+40564)	CDRT15L2 (+422751)	52.8527	6.60473	51.8514	8.34266
	757	cg22949004	chr 19: 50412996	0.0228259	0.000485284	0.566273	3.48875	NUP62	68	NUP62;NUP62;IL4I1;NUP62;NUP62	Body;Body;5'UTR;Body;Body	ATF5 (-19403)	IL4I1 (-12850)	64.0945	2.94076	66.2073	3.01505
	758	cg09122588	chr 13: 97422029	0.0579304	0.0092014	0.827866	2.60448	DQ583891	178479	HS6ST3	Body	OXGR1 (+224574)	HS6ST3 (+678937)	70.5161	10.2838	75.7553	8.85072
	759	cg02898493	chr 17: 62097918	-0.0292232	0.006426	0.804204	-2.72521	ICAM2	76	ICAM2;ICAM2;ICAM2;ICAM2;ICAM2;ICAM2;ICAM2;ICAM2	5'UTR;5'UTR;5'UTR;1stExon;1stExon;5'UTR;1stExon;1stExon	ICAM2 (+75)		42.9084	5.25322	39.2546	5.43963
	760	cg13775050	chr 11: 104916075	0.0247919	0.00297301	0.741216	2.97051	CARD16	-24	CARD16;CASP1;CASP1;CASP1;CASP1;CASP1;CARD16	TSS200;Body;Body;Body;Body;Body;TSS200	CASP5 (-22181)	CASP1 (+56082)	53.208	5.34127	54.86	5.43329
	761	cg05383783	chr 11: 2907819	0.0265252	0.00470947	0.782298	2.82626	CDKN1C	-824	CDKN1C;CDKN1C;CDKN1C	TSS1500;TSS1500;TSS1500	CDKN1C (-825)		43.8433	4.62638	46.7419	3.89238
	762	cg17689490	chr 10: 128952444	0.0224888	0.000123322	0.401977	3.83943	FAM196A	22256	DOCK1;FAM196A	Body;Body	NPS (-395168)	DOCK1 (+358422)	79.7012	3.06387	82.029	2.64875
	763	cg13076843	chr 17: 74475294	0.0332454	0.00777328	0.812526	2.66176	RHBDF2	2333	RHBDF2;RHBDF2	Body;Body	RHBDF2 (+8696)	AANAT (+11665)	79.6142	6.23054	83.6144	4.63446
	764	cg21495349	chr 7: 1081344	-0.0332648	0.00780397	0.813822	-2.66044	C7orf50	-13356	C7orf50;C7orf50;C7orf50	Body;Body;Body	GPR146 (-15796)	CYP2W1 (+58510)	41.4892	5.10851	38.9166	5.52258
	765	cg27570661	chr 16: 73097142	-0.0247652	0.0029755	0.741216	-2.97026	ZFHX3	-4608			ZFHX3 (-14869)		22.1942	4.31062	19.5747	3.31475
	766	cg17953300	chr 11: 65418265	0.0228415	0.000533225	0.566273	3.46349	MIR4489	1603	SIPA1;SIPA1	3'UTR;3'UTR	RELA (+12177)	SIPA1 (+12688)	49.8255	3.25483	52.2167	3.9998
	767	cg15775218	chr 2: 3286338	0.0232938	0.00118335	0.647332	3.24286	TSSC1	37107	TSSC1	Body	MYT1L (-951294)	TRAPPC12 (-97107)	43.4783	3.65063	46.2676	3.70231
	768	cg00119127	chr 7: 1422999	0.0245833	0.00279697	0.736967	2.98921	MICALL2	59121			MICALL2 (+76109)	UNCX (+150346)	70.8021	4.64691	72.8244	3.52829
	769	cg10863207	chr 17: 33412186	0.0287741	0.00622066	0.800713	2.73592	RFFL	4162	RFFL	5'UTR	RFFL (-21428)	NLE1 (+57135)	58.0075	6.37999	61.3153	6.59422
	770	cg06817840	chr 4: 122744213	-0.0239725	0.00214315	0.710362	-3.06964	CCNA2	875	CCNA2	Body	CCNA2 (+874)		19.1279	3.79347	16.8687	3.25068
	771	cg27444940	chr 13: 99013093	0.0313734	0.00735348	0.808894	2.6804	AF339817	-40576	FARP1	Body	RNF113B (-183573)	STK24 (+216302)	62.096	5.54285	66.1702	5.44632
	772	cg18903093	chr 10: 63422511	0.0250149	0.00331217	0.750889	2.93718	C10orf107	-207	C10orf107	TSS1500	ARID5B (-238501)	TMEM26 (-209304)	18.594	3.87414	22.1865	5.02536
	773	cg16975587	chr 3: 46506206	-0.0289199	0.00633935	0.800713	-2.72969	LTF	392	LTF	Body	LTF (+391)		23.532	4.57385	20.8843	4.58893
	774	cg24527194	chr 19: 14073463	-0.0382547	0.00870324	0.823776	-2.6235	DCAF15	2903	RFX1	3'UTR	PODNL1 (-9260)	RFX1 (+43670)	44.0755	8.09379	41.8263	7.0886
	775	cg22745354	chr 2: 928720	0.0293071	0.00663874	0.805162	2.71444	SNTG2	-17833			TMEM18 (-251282)	SNTG2 (-17833)	37.7787	6.14627	41.0172	5.25715
	776	cg15408080	chr 12: 90057674	0.0225849	0.000342297	0.533445	3.58099	ATP2B1	-7830			ATP2B1 (-7831)		19.0191	2.72532	21.4304	3.178
	777	cg04755386	chr 2: 109622481	-0.0296306	0.00681126	0.805162	-2.70593	EDAR	-16653			SH3RF3 (-123515)	EDAR (-16654)	47.2303	6.61609	44.8764	7.02781
	778	cg13996750	chr 9: 139419958	0.040938	0.00894805	0.824694	2.61403	MIR4673	-5880	NOTCH1	Body	SEC16A (-42452)	NOTCH1 (+20279)	41.6379	7.42007	46.503	6.85916
	779	cg23717725	chr 18: 20509932	0.0262915	0.00464037	0.782298	2.83099	RBBP8	-3362			RBBP8 (-3362)		69.101	5.39701	72.6091	3.49753
	780	cg07313814	chr 1: 1272398	-0.0261997	0.00454753	0.778556	-2.83745	DVL1	3159	DVL1	Body	TAS1R3 (+5673)	DVL1 (+12093)	77.6455	4.31355	75.2605	3.8449
	781	cg23335576	chr 14: 104009727	-0.0223503	8.76169e-05	0.38435	-3.92255	TRMT61A	14219			TRMT61A (+14219)	BAG5 (+18927)	37.4312	3.14515	35.5475	3.29339
	782	cg21272919	chr 15: 25014966	0.0227014	0.000550067	0.570305	3.45511	SNRPN	-53827			SNRPN (-86731)	C15orf2 (+94426)	65.2543	3.251	67.1847	2.55171
	783	cg27400313	chr 18: 74824280	-0.0402323	0.00898748	0.824694	-2.61253	MBP	20494	MBP;MBP	5'UTR;5'UTR	MBP (+20493)	ZNF236 (+288165)	50.7403	7.75223	46.6079	7.6697
	784	cg04232935	chr 5: 52860031	-0.024771	0.00321426	0.74821	-2.94647	NDUFS4	3567	NDUFS4	Body	NDUFS4 (+3567)	ARL15 (+746371)	45.5122	4.32621	44.3507	4.71674
	785	cg08183300	chr 15: 72770749	0.0266632	0.00507146	0.790613	2.80246	ARIH1	4083	ARIH1	Body	BBS4 (-207770)	ARIH1 (+4083)	63.3453	3.81993	65.9074	4.72466
	786	cg17498272	chr 19: 58864929	0.0250812	0.00356141	0.752226	2.9146	A1BG	-64	NCRNA00181;A1BG	Body;TSS200	A1BG (-65)		72.11	4.20609	74.4082	3.54294
	787	cg00536792	chr 6: 53530503	0.0244942	0.00294495	0.741216	2.97343	KLHL31	3	KLHL31;KLHL31	1stExon;5'UTR	KLHL31 (+2)		56.0224	3.51303	58.1454	4.05546
	788	cg01653446	chr 14: 20904169	0.0230298	0.00100141	0.627527	3.29013	KLHL33	-368	KLHL33	TSS1500	TEP1 (-22591)	OSGEP (+19097)	71.5716	2.67677	74.0473	2.92537
	789	cg24834394	chr 12: 12620789	-0.0328757	0.00798101	0.814308	-2.65287	DUSP16	53608			MANSC1 (-117621)	DUSP16 (+94658)	43.126	5.24594	41.0664	7.19547
	790	cg11235297	chr 5: 1108315	-0.0330453	0.00802817	0.814308	-2.65088	SLC12A7	3857	SLC12A7	Body	SLC12A7 (+3856)	NKD2 (+99148)	61.9622	8.52713	57.8233	8.42575
	791	cg17390890	chr 12: 74444245	0.0270371	0.00542922	0.791244	2.7804	LOC100507377	242166			NONE		63.1136	4.99992	65.4407	3.5564
	792	cg16559025	chr 1: 2117425	0.0239197	0.00232604	0.712495	3.0451	BC018779	-3811	C1orf86	Body	SKI (-42708)	PRKCZ (+135517)	80.6209	4.0661	83.0072	2.41207
	793	cg05587419	chr 12: 110270636	0.0241476	0.00266581	0.733322	3.00386	MIR4497	-516	TRPV4;TRPV4	5'UTR;5'UTR	TRPV4 (+575)		25.5583	4.30959	27.3985	4.90007
	794	cg18628255	chr 7: 44152333	0.0360345	0.00873434	0.824446	2.62228	AEBP1	1581	AEBP1	Body	AEBP1 (+8374)	POLD2 (+10813)	66.1802	8.03863	70.5428	5.15129
	795	cg03029755	chr 17: 76265444	0.0224296	0.000344331	0.533445	3.57944	TMEM235	38054			TMEM235 (+38054)	SOCS3 (+90713)	29.2324	3.8274	31.6394	3.13376
	796	cg00144725	chr 18: 29076604	-0.026042	0.00465772	0.782298	-2.8298	DSG2	-1422	DSG2	TSS1500	DSG2 (-1422)		77.747	2.9937	75.5352	4.81357
	797	cg14855367	chr 3: 191048308	-0.0228292	0.000876662	0.621916	-3.32738	UTS2D	17	UTS2D;CCDC50;CCDC50;UTS2D	1stExon;Body;Body;5'UTR	UTS2D (+16)		22.5835	3.33174	20.2613	2.65939
	798	cg04396010	chr 3: 176239943	0.0226111	0.000598598	0.572506	3.43225	TBL1XR1	674323			TBL1XR1 (+675104)		49.1791	4.14473	51.3442	4.29033
	799	cg04744713	chr 8: 142517440	0.0310064	0.00760111	0.810655	2.66929	FLJ43860	-110	FLJ43860	TSS200	FLJ43860 (-111)		58.4784	7.51497	61.7637	6.32612
	800	cg02505676	chr 16: 89220516	0.0263837	0.00504238	0.790221	2.80431	LINC00304	-5111	ACSF3;ACSF3;ACSF3	Body;Body;Body	CDH15 (-17646)	ACSF3 (+60300)	66.2853	4.27074	68.8259	4.08993
	801	cg06040811	chr 5: 88018605	-0.0346439	0.00860731	0.823733	-2.62727	LINC00461	-37985	MEF2C;MEF2C	Body;Body	TMEM161B (-453941)	MEF2C (+181316)	45.2573	6.38929	43.1312	7.41493
	802	cg16964673	chr 1: 3775206	0.0281892	0.0062995	0.800713	2.73177	DFFB	1362	KIAA0562;DFFB	TSS1500;Body	CEP104 (-1410)	DFFB (+1362)	25.3221	5.48656	28.6907	5.03038
	803	cg20325547	chr 1: 9431594	-0.0283172	0.00637583	0.803107	-2.7278	SPSB1	15829			SLC25A33 (-167933)	SPSB1 (+78654)	68.5697	5.18966	66.4183	6.06484
	804	cg18089426	chr 14: 101175970	0.0351527	0.00870537	0.823776	2.62341	DLK1	-17231			BEGAIN (-141564)	DLK1 (-17231)	40.9836	4.76482	44.8881	6.70099
	805	cg05976481	chr 12: 92524968	-0.0234201	0.00178634	0.68697	-3.12363	AK055439	11476			DCN (-951610)	BTG1 (+14704)	49.5082	4.23005	47.4834	4.39402
	806	cg04221884	chr 11: 608381	0.0251731	0.00392854	0.769755	2.88384	PHRF1	1316	PHRF1	Body	IRF7 (+7617)	PHRF1 (+31899)	45.2243	3.63689	48.5461	4.16576
	807	cg15970595	chr 7: 45299616	-0.0247486	0.0034531	0.752226	-2.92423	RAMP3	102250			ADCY1 (-314508)	RAMP3 (+102250)	46.659	3.55316	44.2092	4.14288
	808	cg24301692	chr 2: 85696201	0.0330891	0.00830116	0.820394	2.63957	SH2D6	34284			MAT2A (-69899)	CAPG (-58526)	65.4808	6.55613	69.5593	5.12756
	809	cg15441473	chr 10: 134838506	0.026356	0.00507789	0.790613	2.80205	GPR123	-45926			TTC40 (-82418)	GPR123 (-45926)	61.4155	4.03257	64.4635	4.02707
	810	cg18435928	chr 10: 133929736	-0.0226311	0.000699766	0.596478	-3.38967	JAKMIP3	11424	JAKMIP3	Body	DPYSL4 (-70677)	JAKMIP3 (+11424)	73.3078	2.89202	71.2792	2.91261
	811	cg26365786	chr 1: 3394097	0.0255459	0.00427845	0.77481	2.85687	ARHGEF16	5927	ARHGEF16	Body	ARHGEF16 (+22951)	MEGF6 (+133961)	56.5586	3.81343	58.7225	4.22975
	812	cg19411952	chr 8: 61936514	0.0250904	0.00387997	0.769755	2.88776	LOC100130298	-56207			CLVS1 (-264010)	CHD7 (+345191)	19.7693	3.54972	23.1958	5.38448
	813	cg19888654	chr 8: 28929168	-0.0357317	0.00888381	0.824446	-2.61649	DQ595103	10959	KIF13B	Body	HMBOX1 (+181258)	KIF13B (+191441)	75.1767	6.55165	72.4999	7.91186
	814	cg12807013	chr 5: 41922931	0.0263097	0.00506173	0.790613	2.80308	FBXO4	-2424			FBXO4 (-2424)		67.8423	4.48586	70.615	4.05723
	815	cg02695697	chr 8: 89255591	-0.0261168	0.00490228	0.78914	-2.81339	MMP16	84126	MMP16;MMP16	Body;Body	MMP16 (+84125)		52.6082	4.86736	51.2454	6.28242
	816	cg21921789	chr 1: 16067572	-0.0269675	0.00566963	0.798457	-2.7663	TMEM82	-1344	TMEM82;SLC25A34	TSS1500;3'UTR	TMEM82 (-1344)		43.0211	4.67278	40.7275	4.56625
	817	cg23825897	chr 6: 161655043	0.0237749	0.00237098	0.716169	3.03934	AGPAT4	-1709	AGPAT4	5'UTR	AGPAT4 (+40063)	MAP3K4 (+242222)	69.5883	3.37395	72.3453	4.00704
	818	cg20367218	chr 11: 66083224	-0.0283467	0.00653921	0.805162	-2.71944	CD248	1291	CD248	1stExon	CD248 (+1290)	TMEM151A (+23852)	68.3233	5.74695	65.4098	5.0755
	819	cg14921827	chr 12: 131289118	0.0235369	0.00205941	0.70868	3.08153	STX2	34693	STX2;STX2	Body;Body	RIMBP2 (-286657)	STX2 (+34692)	86.2676	3.97743	88.5002	2.55194
	820	cg02637052	chr 20: 5485873	0.0220671	3.92432e-06	0.137806	4.61535	LOC149837	-631	LOC149837	TSS1500	PROKR2 (-190851)	GPCPD1 (+105798)	82.2423	2.64108	84.6283	2.31511
	821	cg20006741	chr 13: 113533910	-0.0277669	0.00619156	0.800713	-2.73746	AK025511	-2059	ATP11A;ATP11A	3'UTR;Body	MCF2L (-89624)	ATP11A (+189268)	75.1585	4.8149	73.2932	4.96346
	822	cg09652533	chr 17: 53049065	0.0238109	0.00243987	0.718618	3.0307	STXBP4	2940	STXBP4	5'UTR	COX11 (-3002)	STXBP4 (+2940)	63.1587	4.05855	65.9395	3.16616
	823	cg10725344	chr 7: 135433639	0.0314447	0.00793933	0.814308	2.65464	FAM180A	-45	FAM180A	TSS200	FAM180A (-46)		60.3326	7.23476	64.323	5.95712
	824	cg15762399	chr 13: 80109047	0.0282549	0.00654986	0.805162	2.7189	NDFIP2	29539	NDFIP2;NDFIP2	Body;Body	NDFIP2 (+53789)	SPRY2 (+806038)	60.6125	6.41315	64.7304	5.91203
	825	cg22388260	chr 16: 14403138	-0.0264251	0.00526706	0.791244	-2.79023	MIR365A	-3	MIR365-1	TSS200	MKL2 (+237943)	PARN (+320989)	42.7249	4.23337	40.1073	4.41225
	826	cg03540197	chr 18: 12894048	-0.0259762	0.00480444	0.784132	-2.81986	PTPN2	-9714			SEH1L (-53934)	PTPN2 (-9715)	21.1538	3.89229	18.3715	3.79808
	827	cg21648121	chr 2: 795273	-0.0302912	0.00751334	0.810607	-2.67319	LOC339822	68839			SNTG2 (-151280)	TMEM18 (-117835)	64.2791	5.63311	61.7348	5.60712
	828	cg25980637	chr 1: 16163967	-0.0265269	0.00537154	0.791244	-2.78387	SPEN	-10391	FLJ37453	Body	UQCRHL (-29774)	SPEN (-10391)	26.8225	5.43115	23.8793	5.27577
	829	cg24073056	chr 2: 8781821	-0.0275473	0.00614558	0.800713	-2.73991	ID2	-40291			ID2 (-40291)		67.0097	5.27614	64.5391	6.10438
	830	cg02677192	chr 21: 45138294	0.0313779	0.00799755	0.814308	2.65217	PDXK	-683	PDXK	TSS1500	PDXK (-683)		51.9768	4.31566	55.4923	5.60094
	831	cg09867667	chr 10: 22605982	-0.0238006	0.00255462	0.731434	-3.0168	COMMD3	671	COMMD3	Body	COMMD3-BMI1 (+671)		25.5018	3.90756	23.4291	4.20133
	832	cg02330507	chr 12: 56333313	0.0237278	0.00243038	0.718478	3.03188	DGKA	4194	DGKA;DGKA;DGKA;DGKA	Body;Body;Body;Body	DGKA (+7502)	PMEL (+27182)	68.9218	3.70087	71.7878	3.40887
	833	cg16048239	chr 19: 1924679	-0.0237122	0.00241821	0.71839	-3.03339	ADAT3	12585	SCAMP4	3'UTR	CSNK1G2 (-16481)	ADAT3 (+19307)	72.1785	3.66646	70.0847	4.23478
	834	cg27431500	chr 16: 1742281	-0.0277703	0.00632773	0.800713	-2.7303	HN1L	11944	HN1L	Body	MAPK8IP3 (-13939)	HN1L (+14004)	68.6916	4.4923	66.9491	7.0395
	835	cg03314569	chr 1: 32041732	0.0228454	0.00116887	0.645647	3.24637	TINAGL1	-353	TINAGL1	TSS1500	TINAGL1 (-353)		59.4629	3.22198	61.1624	3.33958
	836	cg02710090	chr 1: 207225128	-0.0253764	0.00438444	0.778556	-2.84909	YOD1	-706	PFKFB2;PFKFB2;YOD1	TSS1500;TSS1500;TSS1500	PFKFB2 (-1491)	YOD1 (-707)	57.2004	5.05125	55.9877	4.6131
	837	cg18031675	chr 7: 29602763	-0.0231565	0.00167168	0.68697	-3.1431	BC038570	510	PRR15	TSS1500	PRR15 (-663)		20.8741	3.52897	18.1705	3.32252
	838	cg21144009	chr 1: 208281523	0.026784	0.00572645	0.798457	2.76305	PLXNA2	-78972	PLXNA2	Body	CD34 (-196841)	PLXNA2 (+136141)	39.6966	5.01951	42.8119	4.26493
	839	cg05885462	chr 4: 108672936	-0.0225373	0.000822395	0.619158	-3.34515	PAPSS1	-31517			SGMS2 (-72784)	PAPSS1 (-31518)	65.5663	4.00365	63.7355	4.28301
	840	cg26487031	chr 11: 118134801	-0.0271549	0.00603103	0.800286	-2.74609	MPZL2	450	MPZL2;MPZL2	Body;Body	MPZL2 (+449)		29.1431	4.10791	26.0442	4.40775
	841	cg17025149	chr 12: 128596903	0.0344819	0.00892372	0.824446	2.61496	TMEM132C	-155044			TMEM132C (-155044)		55.4706	7.02893	57.7377	6.74655
	842	cg24827405	chr 19: 5148409	-0.0241285	0.00309021	0.74821	-2.95862	BC032415	34517	KDM4B	Body	KDM4B (+179286)	PTPRS (+192404)	52.4133	4.92405	50.8071	4.96009
	843	cg06736663	chr 2: 219754761	0.0244424	0.00342466	0.752226	2.9268	WNT10A	9507	WNT10A	Body	CDK5R2 (-69636)	WNT10A (+9507)	68.6834	3.82686	71.1525	3.26404
	844	cg21205392	chr 1: 151035398	-0.0272598	0.00611612	0.800713	-2.74149	MLLT11	3248	MLLT11	5'UTR	CDC42SE1 (-3274)	MLLT11 (+3248)	46.5642	4.73762	44.9405	4.92897
	845	cg15418423	chr 3: 23225524	0.0307883	0.00794763	0.814308	2.65429	UBE2E2	-19128			UBE2E2 (-19259)		49.7024	4.9853	53.0822	4.96246
	846	cg05378118	chr 10: 50886999	-0.034941	0.00902595	0.824722	-2.61107	C10orf53	-684	C10orf53;C10orf53	TSS1500;TSS1500	CHAT (+64917)	OGDHL (+83425)	37.8649	5.47232	34.7577	5.71487
	847	cg11664652	chr 2: 241534660	-0.0228729	0.00130602	0.660662	-3.21465	CAPN10	8528	CAPN10;CAPN10;CAPN10;CAPN10	Body;Body;Body;Body	GPR35 (-30001)	CAPN10 (+8528)	56.2471	3.86484	54.4386	3.15888
	848	cg02510185	chr 16: 85122369	0.0245055	0.00351646	0.752226	2.91857	FAM92B	23745	KIAA0513	3'UTR	KIAA0182 (-524554)	KIAA0513 (+60960)	52.7054	4.7071	56.1944	4.67678
	849	cg26811313	chr 7: 1959989	-0.0398431	0.00965127	0.83392	-2.58808	MAD1L1	20196	MAD1L1;MAD1L1;MAD1L1	Body;Body;Body	ELFN1 (+211192)	MAD1L1 (+312593)	31.0583	8.03156	27.2186	6.78281
	850	cg12722337	chr 8: 143085750	-0.0305757	0.00791053	0.814308	-2.65586	MIR4472-1	-171949			FLJ43860 (-568421)	TSNARE1 (+398792)	72.9702	5.05616	69.7353	5.41435
	851	cg14209920	chr 19: 13137642	0.0298374	0.00759262	0.810655	2.66967	NFIX	1866	NFIX	Body	NFIX (+31059)	LYL1 (+76331)	28.072	4.87614	31.4182	5.63421
	852	cg12458039	chr 7: 210075	-0.0307146	0.00799663	0.814308	-2.65221	FAM20C	17107	FAM20C	Body	FAM20C (+17107)	PDGFA (+349405)	82.7482	4.03959	79.4302	6.36045
	853	cg12655059	chr 1: 247491708	0.0221891	0.00041996	0.564431	3.52721	ZNF496	1209	ZNF496	Body	ZNF496 (+3336)	VN1R5 (+72335)	75.1084	2.74162	77.4172	2.76725
	854	cg01934709	chr 1: 39357454	0.0223284	0.000607689	0.572506	3.42816	MYCBP	-10156	RHBDL2	Body	GJA9 (-15685)	RHBDL2 (+50001)	78.4926	3.59729	80.64	2.58291
	855	cg19833103	chr 13: 47126551	-0.0220629	0.000193973	0.439333	-3.72674	LRCH1	-744	LRCH1;LRCH1;LRCH1	TSS1500;TSS1500;TSS1500	KIAA0226L (-164917)	ESD (+244815)	27.3604	3.41524	25.2076	2.78692
	856	cg23580000	chr 16: 50322156	0.0261195	0.00528909	0.791244	2.78888	ADCY7	334	ADCY7	1stExon	ADCY7 (+334)		55.773	4.13309	58.2615	3.85874
	857	cg08721338	chr 16: 67233983	-0.0318383	0.00842646	0.821829	-2.63449	ELMO3	572	ELMO3	Body	ELMO3 (+956)		45.1177	6.33068	42.35	6.27496
	858	cg22764700	chr 17: 75798605	-0.0226358	0.00108538	0.634339	-3.26741	FLJ45079	81564			TNRC6C (-201712)	SEPT9 (+521114)	24.005	3.4293	21.5718	2.38542
	859	cg10004882	chr 10: 128830453	0.0242197	0.00334637	0.751088	2.93399	FAM196A	144247	DOCK1	Body	NPS (-517159)	DOCK1 (+236431)	77.838	4.33114	80.1917	3.68047
	860	cg03408024	chr 4: 147075042	0.0252803	0.00453562	0.778556	2.83829	LSM6	-21792			ZNF827 (-215436)	LSM6 (-21792)	46.8726	4.69128	49.8371	5.16137
	861	cg10401489	chr 19: 513241	0.0317149	0.00844845	0.822448	2.6336	Mir_324	5360	C19orf20	Body	CDC34 (-18491)	TPGS1 (+5745)	70.8225	6.23657	73.7276	5.08909
	862	cg13104185	chr 1: 8509372	0.0245558	0.00374701	0.762959	2.89871	RERE	-25625	RERE;RERE	Body;Body	SLC45A1 (+124983)	RERE (+368326)	24.1739	3.27399	27.0625	4.32433
	863	cg10152627	chr 3: 182218332	-0.0264519	0.00568714	0.798457	-2.76529	FLJ46066	-14182			ATP11B (-292958)	SOX2 (+788621)	41.675	5.17887	40.2611	6.11042
	864	cg23929036	chr 1: 114605704	0.0256734	0.00492399	0.78914	2.81196	SYT6	36183			OLFML3 (+83675)	SYT6 (+90767)	65.3871	3.95829	68.1878	3.90368
	865	cg18505670	chr 6: 168771259	0.0259505	0.00520068	0.791244	2.79433	DACT2	-50857			SMOC2 (-70571)	DACT2 (-50858)	33.7068	4.12734	35.5829	4.56522
	866	cg08071700	chr 16: 81579244	-0.0240764	0.0032219	0.748448	-2.94573	CMIP	50291	CMIP;CMIP	Body;Body	PLCG2 (-233654)	CMIP (+100470)	69.0852	3.47474	67.7253	4.90732
	867	cg08837744	chr 2: 200616066	-0.0230019	0.00170541	0.68697	-3.13725	FONG	99830			SATB2 (-286236)	FONG (+99829)	69.5043	2.69588	67.7392	3.79079
	868	cg13716421	chr 5: 118788126	0.0230603	0.00178963	0.68697	3.12309	HSD17B4	-11	HSD17B4	TSS200	HSD17B4 (-11)		27.6334	3.89711	29.4134	3.59509
	869	cg09020649	chr 8: 104310606	-0.0282368	0.00693372	0.805162	-2.70001	FZD6	-54	FZD6;FZD6;FZD6	TSS1500;TSS1500;TSS200	FZD6 (-54)		32.5518	6.17361	29.4157	5.02052
	870	cg01995145	chr 16: 84828603	0.0224114	0.000852626	0.621916	3.33512	CRISPLD2	-24983			CRISPLD2 (-24983)	USP10 (+95049)	83.0244	3.30803	84.9669	2.70482
	871	cg21745283	chr 5: 140602519	-0.0301076	0.00791081	0.814308	-2.65585	PCDHB14	-558	PCDHB14	TSS1500	PCDHB14 (-558)		48.1305	5.21611	45.4243	4.58081
	872	cg00095859	chr 7: 1336729	0.0233983	0.00231779	0.712495	3.04617	UNCX	64076			UNCX (+64076)	MICALL2 (+162379)	53.782	4.8875	55.2674	4.80773
	873	cg23632432	chr 1: 9380566	0.0231351	0.00198891	0.708241	3.09188	SPSB1	27626	SPSB1	5'UTR	SLC25A33 (-218961)	SPSB1 (+27626)	77.1566	4.15505	79.5437	3.13855
	874	cg26035105	chr 2: 121105464	-0.0245074	0.00383345	0.769752	-2.89155	INHBB	1746	INHBB	Body	GLI2 (-449402)	INHBB (+1746)	21.9968	4.53006	19.8575	3.70038
	875	cg26241240	chr 11: 60893661	-0.0278337	0.00678575	0.805162	-2.70718	CD5	23732	CD5	3'UTR	CD5 (+23732)	VPS37C (+35254)	35.5355	4.98577	33.5407	5.40498
	876	cg00755661	chr 1: 112946525	0.0264778	0.00583793	0.800286	2.75675	AX747733	7645	CTTNBP2NL	5'UTR	WNT2B (-104844)	CTTNBP2NL (+7726)	46.8255	4.46363	49.9723	3.87923
	877	cg15586393	chr 4: 1244086	0.0315645	0.00855976	0.823733	2.62915	C4orf42	807	CTBP1;CTBP1;C4orf42	TSS1500;TSS1500;TSS200	CTBP1 (-1179)		25.8542	5.80969	29.9978	6.42369
	878	cg06545359	chr 16: 88029433	-0.0221988	0.000564024	0.570643	-3.44835	BANP	25810	BANP;BANP	Body;Body	ZNF469 (-464445)	BANP (+44396)	86.2645	2.47826	84.4197	3.32111
	879	cg22090150	chr 17: 4098227	0.0236617	0.00279	0.736967	2.98998	CYB5D2	51766	ANKFY1;ANKFY1	Body;Body	CYB5D2 (+51766)	ANKFY1 (+69046)	79.4047	4.56354	82.6993	4.28486
	880	cg19427695	chr 10: 132768120	-0.0236757	0.00279804	0.736967	-2.9891	MIR378C	-7189			PPP2R2D (-979839)	GLRX3 (+833482)	77.4144	3.55224	75.7202	4.10194
	881	cg17252884	chr 3: 15369681	0.0305117	0.00817436	0.81723	2.64478	SH3BP5	4423	SH3BP5;SH3BP5	Body;5'UTR	SH3BP5 (+4422)	CAPN7 (+121949)	33.8919	3.69914	36.8254	5.8029
	882	cg00594099	chr 1: 27893886	-0.0229803	0.00178029	0.68697	-3.12463	AHDC1	-15260	AHDC1	5'UTR	WASF2 (-77209)	AHDC1 (+36256)	28.0598	3.86077	26.6467	4.20608
	883	cg01554451	chr 12: 75873673	0.0238047	0.00302861	0.74474	2.96482	GLIPR1	-839	GLIPR1	TSS1500	GLIPR1 (-839)		65.5656	3.65407	68.2438	4.22124
	884	cg06724693	chr 1: 3010896	-0.0243544	0.00369853	0.76002	-2.90279	PRDM16	25155	PRDM16;PRDM16	Body;Body	ARHGEF16 (-360250)	PRDM16 (+25155)	58.2222	4.03643	55.8234	4.58727
	885	cg04178523	chr 19: 12167295	0.0283943	0.00715548	0.805162	2.68952	ZNF878	-168	ZNF878	TSS200	ZNF878 (-3514)		34.6601	4.52524	37.8956	5.12246
	886	cg25295329	chr 6: 106348603	-0.0285718	0.00727324	0.807236	-2.68407	PRDM1	-185591			PREP (-497605)	PRDM1 (-185591)	52.5389	7.12658	48.838	5.26457
	887	cg18852618	chr 3: 113897736	-0.0253188	0.00478863	0.783532	-2.82092	DRD3	-113	DRD3;DRD3;DRD3;DRD3	1stExon;5'UTR;1stExon;5'UTR	DRD3 (+162)		28.7245	4.29878	26.3557	4.34367
	888	cg11146821	chr 1: 62664360	-0.0235193	0.00263028	0.732389	-3.00794	L1TD1	3887	L1TD1;L1TD1	5'UTR;5'UTR	USP1 (-237614)	INADL (+456212)	70.4181	3.73569	67.8408	5.41211
	889	cg12298745	chr 18: 76737545	-0.0257705	0.0052124	0.791244	-2.79361	SALL3	-2729			SALL3 (-2729)		40.6295	6.53733	38.2438	6.60538
	890	cg12061886	chr 14: 75746793	-0.0220105	0.000354034	0.533694	-3.57217	FOS	448	FOS	Body	JDP2 (-152043)	FOS (+1313)	25.3832	3.02347	23.3595	2.98429
	891	cg02866639	chr 17: 1808743	-0.0279785	0.00697597	0.805162	-2.69799	RPA1	75471			RPA1 (+75471)	RTN4RL1 (+119434)	26.085	4.13176	23.7519	4.59801
	892	cg04580750	chr 1: 244199781	0.0274689	0.00670036	0.805162	2.71138	ZNF238	-14779			AKT3 (-193198)	ZNF238 (-14779)	75.3033	4.21929	78.5528	4.4702
	893	cg11941929	chr 18: 12429120	0.0219465	0.000252977	0.463578	3.65923	SLMO1	8933	SLMO1;SLMO1	Body;Body	SLMO1 (+21226)	SPIRE1 (+228791)	62.915	3.29012	64.7633	2.85673
	894	cg07212543	chr 13: 113613737	-0.0273852	0.0066562	0.805162	-2.71357	MCF2L	-9041			MCF2L (-9797)	ATP11A (+269095)	43.7077	5.93384	42.1231	5.64921
	895	cg08388995	chr 8: 41554149	-0.0228259	0.0016314	0.686524	-3.15023	ANK1	9610	ANK1;ANK1;ANK1;ANK1;ANK1	Body;Body;Body;Body;Body	NKX6-3 (-49275)	ANK1 (+200130)	85.1228	3.07877	82.9569	3.24738
	896	cg11660879	chr 19: 13319417	-0.033121	0.00907365	0.825773	-2.60927	CACNA1A	48948	CACNA1A;CACNA1A	Body;Body	IER2 (+58136)	CACNA1A (+297856)	29.2012	7.08717	25.6827	5.61114
	897	cg08418375	chr 1: 2451039	-0.0266244	0.00605306	0.800286	-2.74489	PANK4	6996	PANK4	Body	PANK4 (+6995)	PLCH2 (+43286)	65.3351	5.35367	64.258	5.75481
	898	cg16511985	chr 3: 153974050	0.0244876	0.00396764	0.77173	2.88072	ARHGEF26	30477	SGEF	3'UTR	DHX36 (+68235)	ARHGEF26 (+135259)	75.4142	5.20861	78.1996	2.92188
	899	cg25649889	chr 2: 171196296	0.0349473	0.00953571	0.832707	2.59223	MYO3B	-29421	MYO3B;MYO3B;MYO3B	Body;Body;Body	SP5 (-375560)	MYO3B (+161642)	64.5463	6.59417	67.7841	5.58299
	900	cg01515543	chr 9: 92254510	-0.0284696	0.00727449	0.807236	-2.68401	UNQ6494	-187	LOC100129066	TSS200	GADD45G (+34584)		29.9055	5.99127	27.7184	4.28702
	901	cg26758131	chr 10: 63671403	-0.0239272	0.00328011	0.750889	-2.94019	ARID5B	10391	ARID5B	Body	ARID5B (+10391)	RTKN2 (+357062)	37.6647	4.49735	36.31	5.27817
	902	cg09735274	chr 6: 30071612	-0.0269878	0.00637884	0.803107	-2.72764	TRIM31	9255	TRIM31	Body	RNF39 (-27985)	TRIM31 (+9254)	28.3301	4.44747	24.9702	4.16711
	903	cg25006430	chr 3: 4341108	0.0220335	0.000449886	0.564431	3.50895	SETMAR	-3879			SETMAR (-3879)		79.7313	3.45891	81.7079	3.07432
	904	cg00250805	chr 11: 75279817	0.0218143	0.000109254	0.391125	3.86906	SERPINH1	991	SERPINH1	Body	SERPINH1 (+6717)	MAP6 (+99661)	75.6068	2.1113	77.4887	2.72036
	905	cg18698681	chr 6: 170571686	-0.0349844	0.00961443	0.833723	-2.5894	LOC154449	-29	LOC154449	TSS200	DLL1 (+28010)	C6orf70 (+419966)	33.2259	7.08475	30.9181	8.28916
	906	cg08295094	chr 6: 32128101	-0.0311161	0.00860598	0.823733	-2.62732	EGFL8	-4254	PPT2;PPT2	Body;Body	EGFL8 (-4254)		72.0558	5.33789	70.0114	5.46632
	907	cg22718636	chr 4: 961658	-0.0348701	0.00957387	0.833153	-2.59085	DGKQ	5686	DGKQ	Body	DGKQ (+5685)	TMEM175 (+35397)	37.4448	5.87416	34.8626	5.84359
	908	cg12254248	chr 3: 141319503	-0.0244219	0.00393871	0.769883	-2.88303	RASA2	84334	RASA2	Body	RNF7 (-137547)	RASA2 (+113578)	75.9596	4.2192	73.9119	4.73268
	909	cg24343594	chr 13: 33158569	0.0230444	0.00202798	0.708524	3.0861	PDS5B	-1994			PDS5B (-1994)		63.499	3.41243	66.1349	3.6161
	910	cg00415665	chr 8: 123875036	-0.0379385	0.0100314	0.837226	-2.57474	ZHX2	81136	ZHX2	5'UTR	ZHX2 (+81136)	DERL1 (+179611)	54.9793	8.04784	52.8969	7.65217
	911	cg22280682	chr 19: 5711875	0.0228344	0.00172571	0.68697	3.13378	LONP1	8301	LONP1	Body	LONP1 (+8300)	RPL36 (+21604)	76.41	2.98502	78.8178	3.2991
	912	cg04244855	chr 7: 611233	-0.0251777	0.00481053	0.784803	-2.81945	PRKAR1B	29988	PRKAR1B;PRKAR1B;PRKAR1B;PRKAR1B;PRKAR1B;PRKAR1B	Body;Body;Body;Body;Body;Body	HEATR2 (-155104)	PDGFA (-51753)	80.6202	4.06773	78.9889	5.33854
	913	cg16567723	chr 13: 114202683	-0.0405903	0.0102802	0.838812	-2.56626	TFDP1	-36319	TMCO3	Body	TFDP1 (-36372)	TMCO3 (+57376)	31.227	7.57701	28.1817	6.2948
	914	cg13788902	chr 2: 242434635	-0.0237383	0.00317028	0.74821	-2.95073	STK25	4821	STK25	3'UTR	STK25 (+13398)	FARP2 (+138972)	67.4125	2.98712	65.6139	3.98475
	915	cg25050392	chr 6: 24933103	0.0226949	0.00162105	0.686524	3.15209	FAM65B	3085			FAM65B (-21909)	CMAHP (+204947)	72.9507	3.98861	75.3467	3.21881
	916	cg06705122	chr 19: 49371079	-0.0222116	0.00086261	0.621916	-3.33188	PLEKHA4	805	PLEKHA4;PLEKHA4	5'UTR;5'UTR	PPP1R15A (-4569)	PLEKHA4 (+804)	45.2441	4.89196	43.5526	5.20918
	917	cg22639325	chr 8: 144672161	0.0234905	0.00282893	0.737642	2.98574	EEF1D	90	EEF1D;EEF1D;EEF1D;EEF1D;EEF1D;EEF1D;EEF1D	Body;5'UTR;5'UTR;5'UTR;Body;5'UTR;Body	NAPRT1 (-11649)	EEF1D (+7683)	87.0157	4.37329	90.0615	2.82364
	918	cg01693350	chr 11: 32452187	0.0321096	0.00904398	0.824722	2.61039	WT1	176	WT1;WT1;WT1;WT1	Body;Body;Body;Body	WT1 (+4893)	RCN1 (+339711)	24.2258	5.19878	27.1551	4.88878
	919	cg24874783	chr 10: 61120097	0.0269962	0.00659164	0.805162	2.7168	FAM13C	2255	FAM13C;FAM13C;FAM13C;FAM13C	Body;5'UTR;5'UTR;Body	PHYHIPL (+183750)	SLC16A9 (+349551)	45.3895	5.33273	48.8537	5.33782
	920	cg09832237	chr 7: 152241945	0.0219019	0.000408967	0.564431	3.53423	LOC100128822	80737			MLL3 (-108856)	XRCC2 (+131304)	83.2506	3.76936	85.4264	2.4685
	921	cg17466567	chr 3: 185826590	0.0759656	0.0109375	0.842621	2.54469	ETV5	-228	ETV5	5'UTR	ETV5 (+310)		20.663	2.44842	27.2703	16.1172
	922	cg07152120	chr 7: 127560847	-0.0227189	0.00169661	0.68697	-3.13877	SND1-IT1	-76714	SND1	Body	LRRC4 (+110154)	SND1 (+268646)	82.9045	3.86515	80.6427	4.49126
	923	cg09122387	chr 10: 98855762	-0.0270225	0.00663244	0.805162	-2.71476	LOC100505540	-6750	SLIT1	Body	SLIT1 (+89920)	C10orf12 (+114722)	34.5043	5.04739	31.7874	4.11236
	924	cg17011799	chr 14: 23751452	0.0338839	0.00955923	0.832729	2.59138	HOMEZ	3857	HOMEZ	Body	SLC7A8 (-98604)	HOMEZ (+3856)	62.4674	5.48892	66.9654	6.33445
	925	cg27200630	chr 3: 138494226	-0.0239813	0.00355947	0.752226	-2.91477	PIK3CB	-16041			PIK3CB (-16042)	FOXL2 (+171755)	24.1361	4.60336	21.9205	3.90737
	926	cg05346140	chr 17: 40275057	0.0236462	0.00313075	0.74821	2.9546	HSPB9	302	HSPB9	1stExon	KAT2A (-1676)	HSPB9 (+302)	82.3881	3.91343	85.0216	2.96278
	927	cg15935247	chr 17: 56606842	-0.0244507	0.0041551	0.771755	-2.86614	41156	-64	SEPT4;SEPT4;SEPT4	TSS200;Body;Body	SEPT4 (-65)		33.6549	5.52133	32.0487	4.75409
	928	cg13281868	chr 6: 53883888	0.0232495	0.00251497	0.726825	3.02153	MLIP	175	C6orf142	1stExon	MLIP (-92356)	LRRC1 (+224355)	75.7853	3.77028	78.0837	3.23945
	929	cg09666977	chr 2: 6665312	0.0224956	0.00139104	0.666224	3.1965	LINC00487	245130			CMPK2 (+340623)	SOX11 (+832514)	71.0345	2.61104	73.144	3.07689
	930	cg04882349	chr 1: 53098299	0.0252517	0.0050586	0.790613	2.80328	FAM159A	-766	FAM159A	TSS1500	FAM159A (-766)		67.4421	5.07809	70.0689	3.99521
	931	cg18100237	chr 8: 139662552	0.0219641	0.000511716	0.566273	3.47455	COL22A1	109978	COL22A1	Body	COL22A1 (+263683)		57.9754	4.17931	58.7756	5.1711
	932	cg14220678	chr 1: 46089024	-0.038029	0.0102101	0.838421	-2.56863	CCDC17	707	CCDC17	Body	NASP (+39365)	GPBP1L1 (+63277)	51.5669	6.24344	48.3209	7.0739
	933	cg04318546	chr 15: 101147087	-0.0305176	0.0086212	0.823733	-2.62672	ASB7	4333	ASB7;ASB7	5'UTR;5'UTR	ALDH1A3 (-272921)	ASB7 (+4333)	61.5852	6.59197	59.5522	6.42666
	934	cg16179521	chr 15: 102009894	-0.0257136	0.00544738	0.791657	-2.77931	PCSK6	20293	PCSK6;PCSK6;PCSK6;PCSK6;PCSK6;PCSK6;PCSK6;PCSK6	Body;Body;Body;Body;Body;Body;Body;Body	SNRPA1 (-174435)	PCSK6 (+20292)	30.6861	4.3267	28.0543	4.77061
	935	cg04717959	chr 6: 33052111	0.0222866	0.00105335	0.633927	3.27588	HLA-DPA1	-3556	HLA-DPB1	Body	HLA-DPB1 (+8409)	COL11A2 (+108133)	82.5877	2.85645	84.9685	3.08118
	936	cg17146731	chr 4: 87517859	0.025327	0.0051721	0.791244	2.79611	PTPN13	2392	PTPN13;PTPN13;PTPN13;PTPN13	5'UTR;5'UTR;5'UTR;5'UTR	PTPN13 (+2392)	SLC10A6 (+252556)	31.7838	3.36743	34.572	4.11734
	937	cg18424208	chr 5: 149546337	0.0259177	0.00572184	0.798457	2.76331	CDX1	-6	CDX1	TSS200	CDX1 (-6)		78.1147	3.7536	80.8655	4.66005
	938	cg25080229	chr 2: 101575012	-0.0244088	0.00417206	0.771755	-2.86485	NPAS2	-16252	NPAS2	Body	RPL31 (-43678)	NPAS2 (+138400)	68.9459	4.17405	66.9002	4.58515
	939	cg26153234	chr 13: 25945413	0.023757	0.00335064	0.751621	2.93359	ATP8A2	-795	ATP8A2	TSS1500	ATP8A2 (-795)		74.868	4.24936	77.6662	3.33522
	940	cg19752322	chr 19: 2731726	-0.0242032	0.00397211	0.77173	-2.88037	SLC39A3	5529			DIRAS1 (-10337)	SLC39A3 (+8347)	56.3604	4.26421	54.3221	3.71498
	941	cg06312072	chr 12: 99287129	-0.0284583	0.00760372	0.810655	-2.66918	ANKS1B	1545	ANKS1B;ANKS1B;ANKS1B	Body;Body;Body	APAF1 (+248052)		30.9361	4.88151	29.0987	5.09333
	942	cg11339839	chr 17: 77901129	0.0312372	0.00895861	0.824694	2.61363	BC044939	7974			CBX4 (-87917)	TBC1D16 (+108517)	70.4564	6.08278	73.5697	4.26237
	943	cg01132484	chr 3: 176916496	0.026203	0.00603948	0.800286	2.74563	TBL1XR1	-1448	TBL1XR1	TSS1500	TBL1XR1 (-1449)		39.3987	4.00874	41.9119	4.18663
	944	cg02851049	chr 16: 101260	-0.0231538	0.00249382	0.722989	-3.02409	POLR3K	2372	POLR3K	Body	SNRNP25 (-2568)	POLR3K (+2371)	76.1572	4.24402	74.3804	4.91592
	945	cg27225068	chr 3: 188623991	-0.0217077	0.000228769	0.460556	-3.68493	TPRG1	-41011			TPRG1 (-265771)	LPP (+693271)	35.5954	4.07859	33.7076	4.18242
	946	cg07464248	chr 13: 114204079	-0.0340896	0.00987062	0.837226	-2.58033	TFDP1	-34923	TMCO3	3'UTR	TFDP1 (-34976)	TMCO3 (+58772)	69.5451	5.86841	67.476	6.50247
	947	cg02875120	chr 12: 113496053	-0.0243079	0.00418347	0.771755	-2.86399	DTX1	392	DTX1	1stExon	DTX1 (+392)		55.1462	3.62552	53.9759	5.32234
	948	cg17534654	chr 7: 28399287	0.0224249	0.00146261	0.67051	3.182	BC087859	-49707	CREB5	5'UTR	JAZF1 (-178851)	CREB5 (-52856)	73.5631	3.20103	75.9032	2.79496
	949	cg14465344	chr 5: 192529	0.0243518	0.00423795	0.773252	2.85988	LRRC14B	904	LRRC14B	1stExon	SDHA (-25826)	PLEKHG4B (+52157)	81.2091	4.6733	83.6295	3.14594
	950	cg20479009	chr 6: 170574923	-0.0348957	0.0100506	0.837226	-2.57408	LOC154449	-3266			DLL1 (+24773)	C6orf70 (+423203)	36.251	7.5794	34.4772	9.22507
	951	cg16471933	chr 19: 45411802	-0.0285272	0.00779552	0.813606	-2.6608	APOE	2764	APOE	Body	APOC1 (-6118)	APOE (+2764)	49.7371	5.55696	47.7013	6.164
	952	cg10542300	chr 15: 48442807	0.029668	0.00844358	0.822176	2.6338	MYEF2	-624	MYEF2	Body	MYEF2 (+27750)	SLC24A5 (+29639)	63.6121	6.5289	67.1344	4.44795
	953	cg17213154	chr 11: 8832956	-0.0235823	0.00324767	0.748971	-2.94327	ST5	-74	ST5;ST5;ST5	TSS1500;TSS200;5'UTR	ST5 (-733)		31.6211	5.04948	30.0112	4.44942
	954	cg11344997	chr 19: 3463788	0.0216227	0.000163619	0.431758	3.76943	C19orf77	16752			C19orf77 (+16751)	NFIC (+97224)	81.1287	3.50117	83.6263	2.00377
	955	cg26919186	chr 18: 56701751	0.0248757	0.00485024	0.787101	2.81682	LOC390858	-1219	LOC390858	TSS1500	SEC11C (-105373)	ZNF532 (+171691)	36.9066	3.7523	39.6921	3.69881
	956	cg02798280	chr 19: 39087135	0.0370259	0.0103532	0.840481	2.56381	MAP4K1	17457	MAP4K1;MAP4K1	Body;Body	MAP4K1 (+21507)	RYR1 (+162796)	29.801	7.15687	34.7167	6.03067
	957	cg18768338	chr 1: 17575440	0.0273403	0.00708741	0.805162	2.69271	PADI3	-152	PADI3	TSS200	PADI3 (-152)		40.6108	4.67022	43.6108	5.20994
	958	cg04808658	chr 3: 52470040	0.0225919	0.00175411	0.68697	3.12899	SEMA3G	9003	SEMA3G	Body	SEMA3G (+9002)	PHF7 (+25514)	85.976	4.47477	88.4534	3.29664
	959	cg16262963	chr 14: 104851903	0.0293388	0.00831705	0.821145	2.63892	AX746996	126295			C14orf180 (-194152)	KIF26A (+246844)	73.3505	6.07457	75.8195	4.36949
	960	cg09867290	chr 4: 174431730	0.0232268	0.00273835	0.736967	2.99568	HAND2	18800			SCRG1 (-111114)	HAND2 (+19647)	38.1525	3.39462	39.7185	4.30559
	961	cg12899381	chr 18: 5891602	-0.0394942	0.0106205	0.841228	-2.55494	TMEM200C	501	TMEM200C	1stExon	TMEM200C (+500)		55.5827	8.58312	54.3596	9.17532
	962	cg08081323	chr 11: 57232407	0.0267337	0.00671255	0.805162	2.71078	RTN4RL2	4069	RTN4RL2	Body	RTN4RL2 (+4069)	SLC43A1 (+49950)	34.3955	5.15456	38.153	5.25709
	963	cg27075654	chr 16: 1503444	0.0246593	0.00466366	0.782298	2.82939	CLCN7	-3646	CLCN7;CLCN7	Body;Body	C16orf91 (-24100)	CLCN7 (+21640)	81.9574	3.90973	83.8656	3.64061
	964	cg26159052	chr 8: 143556090	-0.0234705	0.00315385	0.74821	-2.95233	BAI1	10714	BAI1	Body	BAI1 (+10714)	ARC (+139742)	52.728	3.56038	51.3459	4.40115
	965	cg24600706	chr 10: 118900464	-0.0232379	0.00279748	0.736967	-2.98916	VAX1	-2652			VAX1 (-2653)		26.36	4.00316	23.8296	2.91603
	966	cg18607411	chr 13: 80911808	-0.0230714	0.00254757	0.731089	-3.01763	SPRY2	32	SPRY2	Body	SPRY2 (+3277)	NDFIP2 (+856550)	29.885	4.53753	28.6559	4.88559
	967	cg26576890	chr 6: 41374939	0.0236404	0.00341652	0.752226	2.92754	NCR2	71412			FOXP4 (-139224)	NCR2 (+71412)	39.1578	4.25212	41.9688	3.46705
	968	cg21962791	chr 12: 21590305	0.0231138	0.00263441	0.732389	3.00746	PYROXD1	-232	PYROXD1	TSS1500	PYROXD1 (-232)		26.2397	3.46397	28.1826	4.04769
	969	cg18473544	chr 3: 14409599	0.0249884	0.00508737	0.790827	2.80145	SLC6A6	-34506			SLC6A6 (-34506)	LSM3 (+189372)	59.4641	4.20441	62.2056	4.20168
	970	cg12584450	chr 19: 1986191	-0.0251389	0.00530123	0.791244	-2.78814	BTBD2	5107	BTBD2	3'UTR	BTBD2 (+29510)	CSNK1G2 (+45031)	57.987	4.22664	56.8249	5.33373
	971	cg24942458	chr 19: 33723713	0.027122	0.00706248	0.805162	2.69388	SLC7A10	-6957			SLC7A10 (-6958)	CEBPA (+69716)	60.4527	5.17404	62.9056	4.00866
	972	cg13494348	chr 6: 170596856	-0.0251542	0.00533284	0.791244	-2.78621	DLL1	2841	DLL1	Body	DLL1 (+2840)	C6orf70 (+445136)	39.916	7.03198	38.6647	6.02773
	973	cg20217649	chr 8: 67835351	-0.022636	0.00194121	0.701484	-3.09908	SNORD87	-567	SNORD87;SNHG6	TSS1500;Body	TCF24 (+39473)	C8orf45 (+52368)	50.9975	4.21696	48.4611	4.47097
	974	cg16595607	chr 2: 63279495	-0.0232208	0.00283831	0.737742	-2.98473	OTX1	1559	OTX1	5'UTR	OTX1 (+1559)	WDPCP (+536371)	44.9406	3.6043	42.0176	4.61706
	975	cg05493336	chr 16: 89469845	0.02485	0.00497959	0.78914	2.80835	ANKRD11	14931	ANKRD11	5'UTR	ANKRD11 (+87123)	ZNF778 (+185735)	50.6679	3.99867	52.8528	3.73828
	976	cg15599668	chr 5: 150005953	0.0271823	0.00714198	0.805162	2.69015	SYNPO	8748	SYNPO;SYNPO	Body;Body	MYOZ3 (-34450)	SYNPO (+25312)	34.7516	5.05525	38.0854	4.33693
	977	cg18635670	chr 6: 26539327	-0.0256483	0.00583265	0.800286	-2.75704	HMGN4	756	HMGN4	5'UTR	HMGN4 (+756)		19.9908	4.30493	17.9191	3.67693
	978	cg18675097	chr 6: 28227127	0.0317076	0.00946823	0.832193	2.59467	NKAPL	30	NKAPL;NKAPL	5'UTR;1stExon	ZNF187 (-7660)	ZKSCAN4 (-7126)	18.3469	5.4256	21.7329	5.59813
	979	cg17929042	chr 7: 70200532	-0.0231708	0.00283833	0.737742	-2.98473	AUTS2	-30715	AUTS2;AUTS2	Body;Body	WBSCR17 (-397256)		76.693	3.68512	74.9817	4.21447
	980	cg08330435	chr 5: 143978398	0.031993	0.00959459	0.833723	2.59011	KCTD16	393559			KCTD16 (+427962)		17.2202	5.14119	20.6742	5.05042
	981	cg05050341	chr 9: 130617534	0.0243581	0.00450982	0.778556	2.84011	ENG	-487	ENG;ENG	TSS1500;TSS1500	ENG (-488)		63.9224	6.22171	65.4218	4.74501
	982	cg23627149	chr 1: 193155273	-0.025073	0.00533055	0.791244	-2.78635	B3GALT2	470	B3GALT2;B3GALT2;CDC73	5'UTR;1stExon;Body	B3GALT2 (+469)		31.6892	4.18246	30.1134	5.00446
	983	cg23937633	chr 5: 142252159	0.0215135	0.00019536	0.439333	3.72494	BC039527	-3684	ARHGAP26;ARHGAP26	Body;Body	ARHGAP26 (+101868)	NR3C1 (+531885)	74.8753	2.77752	76.9555	2.58845
	984	cg23892836	chr 6: 29692085	0.0235853	0.0034921	0.752226	2.92073	HLA-F	651	HLA-F;HLA-F;HLA-F	Body;Body;Body	HLA-F (+969)		38.8614	3.95061	41.1142	3.23638
	985	cg00253564	chr 1: 6552403	0.0222492	0.00142308	0.668462	3.18993	PLEKHG5	-643	PLEKHG5;PLEKHG5;PLEKHG5	Body;Body;TSS1500	TNFRSF25 (-26149)	PLEKHG5 (+5080)	57.9425	3.02184	60.1281	3.10781
	986	cg18448949	chr 2: 176993089	0.0218079	0.000647806	0.589171	3.41077	AX747372	106	HOXD8	TSS1500	HOXD8 (-1378)		25.4094	4.59244	26.6877	4.39639
	987	cg20540306	chr 5: 153787169	0.0304355	0.00904403	0.824722	2.61039	FLJ38109	38213	GALNT10;GALNT10	Body;Body	SAP30L (-38347)	GALNT10 (+216875)	50.8931	4.77915	54.0456	4.86974
	988	cg16506290	chr 8: 74565883	0.0268314	0.00698933	0.805162	2.69735	STAU2	84701	STAU2;STAU2;STAU2;STAU2;STAU2;STAU2;STAU2	Body;Body;Body;Body;Body;Body;5'UTR	STAU2 (+93278)	RDH10 (+359047)	76.524	4.77126	78.9619	3.99579
	989	cg13058819	chr 1: 234350834	0.0252067	0.00549953	0.79371	2.77622	AK054726	0	SLC35F3	Body	C1orf31 (-158594)	SLC35F3 (+310156)	31.8019	4.15775	35.2871	5.04317
	990	cg25814969	chr 2: 8726136	0.0214848	0.000182016	0.436232	3.74275	ID2	-95976			ID2 (-95976)		79.29	2.8677	80.7001	3.41184
	991	cg26312965	chr 1: 1152547	-0.0247532	0.0050236	0.789773	-2.80552	TNFRSF4	-2999	SDF4;SDF4	3'UTR;3'UTR	TNFRSF4 (-3000)		77.7693	4.52366	76.5677	5.28602
	992	cg07889936	chr 6: 30616472	-0.0241183	0.0043215	0.778201	-2.85369	C6orf136	1657	C6orf136;C6orf136;C6orf136	Body;Body;Body	C6orf136 (+1657)	DHX16 (+24357)	80.0641	3.94873	78.8049	4.81047
	993	cg03261725	chr 17: 70367843	-0.0279905	0.00777607	0.812526	-2.66164	Mir_584	-31036			SOX9 (+250683)	SLC39A11 (+721009)	50.2128	5.24529	48.1513	5.15095
	994	cg25148282	chr 17: 56561060	0.0294278	0.00865254	0.823733	2.62549	HSF5	4699	HSF5	Body	RNF43 (-66130)	HSF5 (+4698)	61.96	6.12738	65.6586	4.40564
	995	cg20796556	chr 18: 21032774	-0.0676018	0.0115033	0.844549	-2.52703	RIOK3	-12	RIOK3	TSS200	RIOK3 (-12)		42.3636	14.3908	35.7095	8.54517
	996	cg04476341	chr 5: 669733	-0.0224522	0.00180312	0.68697	-3.12088	TPPP	9160	TPPP	Body	TPPP (+23776)	CEP72 (+57329)	45.0518	5.23661	43.6265	4.2023
	997	cg15688628	chr 12: 94539768	-0.0239806	0.00412725	0.771743	-2.86827	PLXNC1	-2730			PLXNC1 (-2730)		33.8641	3.2636	32.2126	4.933
	998	cg06967105	chr 1: 1104265	0.0223082	0.00161506	0.686524	3.15317	MIR429	-119	MIR429	TSS200	C1orf159 (-52530)	TTLL10 (-5020)	63.0678	2.93443	65.0944	3.66338
	999	cg15689991	chr 12: 65019329	-0.0279964	0.0078446	0.814308	-2.65869	MIR548Z	-2944	RASSF3	Body	RASSF3 (+15037)	GNS (+133896)	45.8931	5.88252	42.7353	5.18639
	1000	cg26671988	chr 5: 102089760	-0.0315471	0.00955338	0.832729	-2.59159	PAM	-111766			SLCO6A1 (-255041)	PAM (-111766)	54.0742	5.47462	52.7824	6.76219

## Sheet: T2. MTG HPs
	Supplementary Table 2. Top 1000 Hydroxymethylated Positions in MTG
	Displayed for each probe is chromosomal position (genome build 37), log2 fold change estimate for the case-control analysis (logFC), accompanying p-values, Benjamini-Hochberg FDR adjusted values and t-statistics, UCSC gene annotation of closest transcription start site (TSS; column: ID) and the correspoding distance to the TSS (Distance TSS), Illumina gene annotation (UCSC Annotation) and genomic…
														Control		AD
	Rank	Probe ID	Position	logFC	P-value	FDR	t	ID	Distance TSS	UCSC Annotation	Region	GREAT Annotation		Average 5hmC (%)	Standard Deviation	Average 5hmC (%)	Standard Deviation
	1	cg10857341	chr 2: 161952702	0.056776	2.70959e-06	0.173964	4.69169	TANK	-40763			RBMS1 (-602385)	TANK (-40763)	1.89805	6.48544	8.11815	5.65337
	2	cg05270236	chr 6: 158269807	-0.0532888	6.49917e-06	0.193449	-4.50946	SNX9	25514	SNX9	Body	SYNJ2 (-133080)	SNX9 (+25514)	21.8632	5.69595	17.0174	4.72117
	3	cg01024962	chr 14: 31389792	0.0491203	8.67866e-05	0.461884	3.92484	LOC100506071	-30778	STRN3;STRN3	Body;Body	AP4S1 (-104519)	COCH (+46052)	2.69288	5.0303	8.08054	5.93737
	4	cg08752433	chr 12: 111016566	-0.0430259	3.14133e-05	0.412053	-4.16297	PPTC7	4498	PPTC7	Body	PPTC7 (+4497)	RAD9B (+76562)	21.1206	4.90906	16.7118	4.88282
	5	cg26452584	chr 10: 91227359	-0.0447011	6.53666e-05	0.461884	-3.99255	SLC16A12	-30798	SLC16A12	5'UTR	IFIT5 (+53035)	SLC16A12 (+67953)	2.73145	4.89883	-1.03474	5.05987
	6	cg05150327	chr 15: 81617335	0.0430555	4.85536e-05	0.461884	4.06248	STARD5	-811	STARD5	TSS1500	STARD5 (-812)		1.46726	4.63142	4.59892	5.1626
	7	cg26565893	chr 17: 73501109	-0.0440401	8.10733e-05	0.461884	-3.9412	CASKIN2	4849	CASKIN2;CASKIN2	Body;Body	CASKIN2 (+10517)	KIAA0195 (+48446)	11.7834	5.47286	6.90869	5.01278
	8	cg14525270	chr 1: 43766647	0.0414572	3.65249e-05	0.412053	4.12843	TIE1	82	TIE1	TSS200	TIE1 (+82)		8.09576	5.21611	11.9023	4.49938
	9	cg10310119	chr 12: 129276152	-0.0496145	0.00018853	0.461884	-3.73391	AK001057	22916			SLC15A4 (+32388)	TMEM132C (+524205)	13.0006	6.64075	7.37506	6.08864
	10	cg10986236	chr 3: 4274847	0.0448498	0.000184843	0.461884	3.73888	SETMAR	-70140			SETMAR (-70140)	LRRN1 (+433727)	15.9632	5.69645	19.0993	6.22433
	11	cg16254746	chr 6: 30698843	0.0428228	0.000186556	0.461884	3.73656	TUBB	9421	FLOT1	Body	TUBB (+10687)	FLOT1 (+11609)	10.9984	4.27159	14.5236	5.26285
	12	cg14503291	chr 17: 47838533	-0.048089	0.000323772	0.562141	-3.5955	FAM117A	2985	FAM117A	Body	SLC35B1 (-53252)	KAT7 (-27447)	14.8782	5.13568	10.6469	6.07118
	13	cg19572076	chr 2: 118621741	-0.0394753	0.000108878	0.461884	-3.86991	DDX18	49487			INSIG2 (-224308)	DDX18 (+49487)	3.65814	6.62106	0.196903	5.18081
	14	cg04580750	chr 1: 244199781	-0.0407429	0.000142844	0.461884	-3.80319	ZNF238	-14779			AKT3 (-193198)	ZNF238 (-14779)	4.15722	4.09293	-0.0875001	4.74341
	15	cg08410533	chr 10: 375830	-0.038282	4.25102e-05	0.446584	-4.0934	DIP2C	40077	DIP2C	Body	ZMYND11 (+149897)	DIP2C (+359777)	10.4577	4.52141	6.33928	4.86425
	16	cg13055709	chr 1: 234852861	0.042865	0.000270809	0.509096	3.64173	LOC100506810	-6927			IRF2BP2 (-107591)	TOMM20 (+439394)	5.23563	5.71813	8.4689	5.58012
	17	cg07719898	chr 1: 200274728	-0.0395358	0.000166933	0.461884	-3.76443	C1orf98	68192			FAM58BP (+92073)	ZNF281 (+104437)	3.27179	4.26175	-1.12069	5.42305
	18	cg24132989	chr 6: 88050339	0.0475122	0.000385553	0.56906	3.54978	C6orf163	-4231	C6orf162;C6orf162	3'UTR;3'UTR	C6orf163 (-4231)		3.80508	8.89076	7.52209	9.49528
	19	cg18965659	chr 17: 80624885	0.0463057	0.000374815	0.562141	3.55721	WDR45L	-18474	RAB40B	Body	WDR45L (-18475)	RAB40B (+31712)	3.99537	6.16699	7.84715	6.01011
	20	cg11579447	chr 15: 49535972	0.0510493	0.000471399	0.591773	3.4965	Metazoa_SRP	-44581	GALK2;GALK2	Body;Body	FGF7 (-179402)	GALK2 (+73551)	6.39757	7.77273	10.7325	6.00757
	21	cg00682103	chr 8: 141554380	0.0385473	0.000152983	0.461884	3.78618	DQ574852	-18505	EIF2C2;EIF2C2	Body;Body	CHRAC1 (+32984)	EIF2C2 (+91265)	8.94578	3.3	12.8257	5.08804
	22	cg06853339	chr 17: 76117687	0.0602188	0.000525294	0.599465	3.46752	TMC6	1143	TMC6;TMC6	Body;Body	TMC6 (+7173)	TNRC6C (+117370)	4.66046	7.75136	10.4015	7.30476
	23	cg22023879	chr 6: 31767600	-0.0421048	0.000349701	0.562141	-3.57539	VARS	-3888	LSM2	Body	VARS (-3889)		8.73414	5.94932	4.51849	4.71702
	24	cg07655487	chr 11: 66849820	-0.0369264	0.000116886	0.461884	-3.85257	RHOD	25532			KDM2A (-36919)	RHOD (+25532)	4.11818	4.04222	0.361052	4.13428
	25	cg08117728	chr 6: 32179567	-0.0411054	0.000344273	0.562141	-3.57948	NOTCH4	-8057	NOTCH4	Body	GPSM3 (-16268)	NOTCH4 (+12276)	10.8045	5.87068	5.85381	5.12312
	26	cg17247149	chr 3: 66455638	0.0381234	0.000186314	0.461884	3.73688	LRIG1	-804	LRIG1	Body	LRIG1 (+95206)	SLC25A26 (+336354)	7.6655	4.94823	10.3039	5.00088
	27	cg05002166	chr 1: 217119469	-0.0441545	0.000513587	0.599465	-3.47357	ESRRG	-6454	ESRRG;ESRRG;ESRRG	5'UTR;5'UTR;5'UTR	ESRRG (-222656)	GPATCH2 (+684939)	6.61045	5.65163	2.40104	5.33404
	28	cg15418423	chr 3: 23225524	-0.0393114	0.000328706	0.562141	-3.59156	UBE2E2	-19128			UBE2E2 (-19259)		7.49238	3.86341	2.92065	5.2465
	29	cg00457087	chr 1: 162602295	-0.0367537	0.000137492	0.461884	-3.81264	DDR2	68	DDR2;DDR2;DDR2;DDR2	1stExon;1stExon;5'UTR;5'UTR	DDR2 (+68)		3.55019	4.27922	-1.09508	4.7962
	30	cg06746318	chr 7: 101755186	0.0435483	0.000523727	0.599465	3.46832	SH2B2	-173218	CUX1;CUX1;CUX1	Body;Body;Body	SH2B2 (-173218)	CUX1 (+294305)	6.76403	5.83833	10.2381	6.16608
	31	cg03503988	chr 20: 52827774	-0.0492308	0.00062033	0.608711	-3.42257	PFDN4	3273	PFDN4	Body	DOK5 (-264491)	PFDN4 (+3273)	22.8627	6.57041	17.939	6.22602
	32	cg18804147	chr 7: 882010	-0.0400503	0.000376415	0.562141	-3.55609	SUN1	-967	UNC84A;UNC84A	Body;Body	GET4 (-34180)	SUN1 (+9869)	7.8768	4.17567	3.3064	5.9659
	33	cg21164050	chr 13: 27757411	0.0433461	0.000579069	0.599465	3.44123	USP12	-11378			RPL21 (-68280)	USP12 (-11379)	9.15728	5.19034	12.8007	6.3345
	34	cg04889800	chr 1: 16163555	0.0505749	0.000708167	0.617879	3.3864	SPEN	-10803	FLJ37453	Body	UQCRHL (-29362)	SPEN (-10803)	24.237	6.19827	29.2115	6.50712
	35	cg24158936	chr 1: 177177623	-0.0376671	0.000363289	0.562141	-3.56541	FAM5B	36991	FAM5B	5'UTR	FAM5B (+36991)	SEC16B (+761426)	10.9172	5.45668	6.7723	4.88271
	36	cg20703928	chr 2: 106364229	-0.051933	0.000805464	0.617879	-3.35091	NCK2	2710	NCK2;NCK2	5'UTR;5'UTR	FHL2 (-348549)	NCK2 (-103974)	15.0598	6.20798	9.52711	7.41862
	37	cg03658337	chr 19: 6166119	0.0474085	0.000811705	0.617879	3.34877	ACSBG2	30410	ACSBG2	Body	ACSBG2 (+30410)	MLLT1 (+113839)	5.91399	5.78574	9.67605	6.45026
	38	cg04819081	chr 2: 24026544	-0.0423757	0.000732243	0.617879	-3.37721	ATAD2B	28928	ATAD2B	Body	ATAD2B (+123391)		14.1854	6.38069	10.7287	6.08735
	39	cg13594542	chr 9: 138850547	0.0352291	0.000151734	0.461884	3.78821	UBAC1	2679	UBAC1	Body	CAMSAP1 (-51543)	UBAC1 (+2678)	10.3239	3.75574	14.1453	4.19616
	40	cg01334831	chr 13: 114832833	0.0358997	0.000286825	0.528086	3.62692	RASA3	10605	RASA3	Body	GAS6 (-265788)	RASA3 (+65261)	14.4562	4.6291	17.541	4.75433
	41	cg01165909	chr 17: 41521676	-0.0359816	0.000335024	0.562141	-3.5866	MIR2117	-497	MIR2117	TSS1500	DHX8 (-39657)	ARL4D (+45324)	2.23017	5.06181	-1.00752	4.67527
	42	cg12895207	chr 13: 112575376	0.0358277	0.000304456	0.549223	3.61148	SOX1	-146536			SOX1 (-146536)	C13orf16 (+602362)	11.9171	3.77719	15.0276	4.41084
	43	cg15895925	chr 1: 33810859	0.0380447	0.000616292	0.60809	3.42434	PHC2	4640	PHC2;PHC2	5'UTR;Body	PHC2 (+30334)	ZNF362 (+88686)	3.43053	5.24841	6.98918	4.86661
	44	cg17363632	chr 8: 140968381	-0.0368697	0.000546152	0.599465	-3.45704	AX748239	145394	TRAPPC9;TRAPPC9	Body;Body	KCNK9 (-253083)	TRAPPC9 (+500296)	6.27584	6.13404	2.80386	4.70627
	45	cg01328190	chr 16: 14529714	0.0513006	0.000995751	0.617879	3.29172	mir-108-1	-126484	PARN;PARN	3'UTR;3'UTR	PARN (+194413)	MKL2 (+364519)	8.69048	7.4198	12.6211	7.19521
	46	cg10287485	chr 11: 69473145	-0.035039	0.000191462	0.461884	-3.73002	BC133018	-292			ORAOV1 (+17019)	CCND1 (+17273)	9.76144	4.39361	5.4837	4.46321
	47	cg19378216	chr 20: 31870775	0.0367341	0.000541898	0.599465	3.45914	BPIFB1	-165	C20orf114	TSS200	BPIFB1 (-165)		4.18066	5.0126	6.94748	4.96977
	48	cg01783195	chr 16: 53524545	0.0379262	0.00065906	0.60936	3.40607	AKTIP	12625	RBL2	3'UTR	AKTIP (+12624)	RBL2 (+56195)	8.18235	5.16542	12.1901	4.72952
	49	cg08371947	chr 4: 8477793	0.0337051	3.89636e-06	0.173964	4.61684	METTL19	2551	C4orf23	3'UTR	GPR78 (-104423)	METTL19 (+35262)	1.05382	3.15856	4.64601	3.4846
	50	cg04197347	chr 3: 66022776	-0.0407642	0.000925872	0.617879	-3.31213	MAGI1	1733	MAGI1;MAGI1;MAGI1	Body;Body;Body	MAGI1 (+1732)		17.1387	5.26606	12.4208	5.3103
	51	cg24601055	chr 1: 87372153	-0.0334396	1.25594e-05	0.280374	-4.36764	41167	7954	SEP15;SEP15	Body;Body	SEP15 (+7953)	SH3GLB1 (+201901)	14.6216	4.29609	10.8051	4.34434
	52	cg25594319	chr 10: 134461778	0.0362073	0.000572722	0.599465	3.44421	INPP5A	40360	INPP5A	Body	INPP5A (+110426)	NKX6-2 (+137758)	5.39705	5.57024	8.31924	3.62347
	53	cg05844832	chr 2: 212786221	0.0405158	0.000966369	0.617879	3.30014	MIR548F2	504863	ERBB4;ERBB4	Body;Body	ERBB4 (+617130)		8.39322	4.9771	12.2531	5.76626
	54	cg08803490	chr 12: 80288661	0.0404723	0.000968952	0.617879	3.29939	PPP1R12A	19030	PPP1R12A;PPP1R12A;PPP1R12A	Body;Body;5'UTR	PAWR (-203872)	PPP1R12A (+40316)	14.3819	5.89911	17.4034	5.37516
	55	cg15464821	chr 1: 167682648	0.0354945	0.000515772	0.599465	3.47243	TRNA_Pro	-1313			CREG1 (-159593)	MPZL1 (-8538)	11.6576	4.82719	14.3855	4.46615
	56	cg15597364	chr 1: 22919937	-0.0347548	0.000404326	0.576891	-3.53724	EPHA8	29934	EPHA8	Body	C1QA (-43180)	EPHA8 (+29934)	5.76585	4.50302	2.24794	5.10684
	57	cg20709110	chr 22: 19946873	-0.0345165	0.000403721	0.576891	-3.53764	COMT	-1848	COMT;COMT;COMT	5'UTR;5'UTR;5'UTR	TXNRD2 (-17515)	ARVCF (+57435)	10.2169	4.02122	6.6362	4.38165
	58	cg08597839	chr 1: 29461008	-0.0397182	0.00103274	0.617879	-3.28145	TMEM200B	-10587			TMEM200B (-10588)	SRSF4 (+47628)	3.27661	5.43651	-0.523938	5.27589
	59	cg13829089	chr 17: 7460690	-0.0383543	0.00096616	0.617879	-3.3002	TNFSF13	-918	TNFSF13;TNFSF13;TNFSF12;TNFSF12-TNFSF13;TNFSF13	TSS1500;TSS1500;3'UTR;Body;TSS1500	SENP3 (-4618)		5.25007	4.84425	0.951301	5.30908
	60	cg03559880	chr 6: 105310709	-0.0364841	0.000792309	0.617879	-3.35547	HACE1	-2915			HACE1 (-2916)		3.09153	5.78611	-0.0739384	4.76812
	61	cg00937742	chr 2: 133429299	-0.03535	0.0006081	0.606726	-3.42798	LYPD1	-229	LYPD1;LYPD1	TSS1500;TSS1500	LYPD1 (-819)		13.0797	5.1741	9.0816	3.90848
	62	cg03461851	chr 15: 62457883	-0.0347845	0.000505247	0.599465	-3.47796	C2CD4B	-401	C2CD4B	TSS1500	C2CD4B (-402)		2.17491	5.68711	-0.424811	5.08015
	63	cg07701757	chr 4: 147164858	0.0331076	0.000122523	0.461884	3.84102	LSM6	67978			LSM6 (+68024)	SLC10A7 (+278264)	-0.572459	3.4718	2.61513	3.60176
	64	cg22211672	chr 15: 74610366	-0.0325571	3.85107e-06	0.173964	-4.61926	CCDC33	-533	CCDC33;CCDC33	Body;TSS1500	CYP11A1 (+49714)	CCDC33 (+81700)	8.88523	3.83929	4.93419	4.03634
	65	cg14962509	chr 1: 36039655	-0.0569637	0.0015278	0.676137	-3.16935	TFAP2E	685	TFAP2E	Body	TFAP2E (+685)		10.3513	7.95715	2.81675	8.96192
	66	cg24171047	chr 17: 64765921	0.0344428	0.00053504	0.599465	3.46257	MIR634	-17268	PRKCA	Body	CACNG5 (-107426)	PRKCA (+466996)	-0.343031	4.19054	2.99387	4.00694
	67	cg20484417	chr 12: 81763492	0.0339852	0.000394313	0.576891	3.54386	PPFIA2	-299	PPFIA2	Body	ACSS3 (+291684)	PPFIA2 (+389616)	2.3613	4.17882	4.7253	4.94794
	68	cg19587968	chr 10: 134362785	0.0346241	0.000608115	0.606726	3.42797	INPP5A	11433	INPP5A	Body	INPP5A (+11433)	NKX6-2 (+236751)	3.75106	4.11425	6.61255	5.09806
	69	cg25449950	chr 4: 24797174	-0.033109	0.00019397	0.461884	-3.72674	SOD3	90	SOD3;SOD3	5'UTR;1stExon	SOD3 (+90)		3.97387	4.18992	0.00698785	3.76229
	70	cg22765612	chr 19: 5237246	-0.0322307	5.5677e-06	0.193449	-4.54217	PTPRS	48999	PTPRS;PTPRS;PTPRS;PTPRS	Body;Body;Body;Body	PTPRS (+103567)	KDM4B (+268123)	3.38356	3.83423	0.496864	3.31023
	71	cg06913337	chr 16: 88590404	0.037727	0.00121459	0.649585	3.23543	C16orf85	42721	ZFPM1	Body	ZC3H18 (-46384)	ZFPM1 (+70391)	4.86425	5.99401	7.53013	4.79457
	72	cg01779732	chr 15: 90015521	-0.0326611	0.000178323	0.461884	-3.7479	RHCG	24278	RHCG	3'UTR	POLG (-137496)	RHCG (+24277)	4.69836	3.76282	0.907436	3.91971
	73	cg23720331	chr 10: 123873670	0.0321191	1.50743e-05	0.299126	4.3276	TACC2	1117	TACC2;TACC2	Body;Body	PLEKHA1 (-260423)	TACC2 (+124982)	8.16437	3.27833	11.5958	3.55061
	74	cg10162914	chr 4: 170943016	-0.0378877	0.00130033	0.659486	-3.21591	MFAP3L	4413	MFAP3L	5'UTR	C4orf27 (-263924)	MFAP3L (+4412)	15.0421	5.28799	11.3533	5.02164
	75	cg02374486	chr 10: 72362809	-0.0323599	0.000146419	0.461884	-3.79707	PRF1	-278	PRF1;PRF1	TSS1500;TSS1500	PRF1 (-279)		7.57399	4.11123	4.71436	3.90376
	76	cg05056638	chr 8: 24800824	-0.0384182	0.00138169	0.668275	-3.19845	NEFL	13307			NEFL (+13306)	NEFM (+29551)	2.92193	5.11649	-1.07448	5.50631
	77	cg08414068	chr 5: 31857916	-0.0384779	0.00141803	0.672514	-3.19096	PDZD2	2874	PDZD2	Body	PDZD2 (+58921)	GOLPH3 (+316508)	16.6778	5.81853	12.5136	5.48056
	78	cg01114124	chr 2: 240171748	0.0376321	0.00136282	0.668275	3.20241	HDAC4	48586	HDAC4	Body	HDAC4 (+150894)	TWIST2 (+415076)	9.92515	5.68293	12.4931	5.22065
	79	cg07855465	chr 17: 79377665	0.0450535	0.00174488	0.676137	3.13054	MIR4740	-3087	BAHCC1	Body	BAHCC1 (+4126)	ACTG1 (+102226)	5.85246	6.77858	8.73352	7.05914
	80	cg16831055	chr 22: 37731229	0.0316012	8.71158e-06	0.222259	4.44691	AK097787	19650			CYTH4 (+52735)	ELFN2 (+92275)	2.87694	3.5522	5.71096	3.23818
	81	cg07747256	chr 6: 22251202	0.0345674	0.000845677	0.617879	3.3374	PRL	46106			PRL (+51879)	SOX4 (+657231)	4.88855	4.66981	8.13884	4.67663
	82	cg04583000	chr 16: 11888783	-0.0446542	0.00175194	0.676137	-3.12935	ZC3H7A	2331			TXNDC11 (-52136)	ZC3H7A (+2330)	11.6079	5.74269	7.70056	6.16892
	83	cg14580628	chr 5: 43602116	0.0354969	0.00102428	0.617879	3.28377	NNT	-674	NNT;NNT	TSS1500;TSS1500	NNT (-1112)		9.9023	5.04945	12.5669	5.11971
	84	cg15396434	chr 5: 38725168	-0.036795	0.00138257	0.668275	-3.19827	AK126213	96413			LIFR (-129662)	OSMR (-120932)	6.33544	4.90686	2.62478	6.0706
	85	cg23626617	chr 1: 46268158	-0.0332993	0.000584535	0.599465	-3.43869	MAST2	-1126	MAST2	TSS1500	MAST2 (-1126)		7.81107	4.77226	4.784	4.27255
	86	cg00887936	chr 3: 66033260	0.0337953	0.000755116	0.617879	3.36874	MAGI1	-8751			SLC25A26 (-86024)	MAGI1 (-8752)	0.321568	5.02623	3.15327	4.58639
	87	cg19942731	chr 22: 45609421	0.0528695	0.0019719	0.679627	3.09443	KIAA0930	-41	C22orf9;C22orf9	Body;TSS1500	UPK3A (-71446)	NUP50 (+49696)	8.5822	8.01362	12.8604	6.79424
	88	cg24721647	chr 4: 185726836	0.032266	0.000331092	0.562141	3.58967	ACSL1	106	ACSL1	5'UTR	MLF1IP (-71551)	ACSL1 (+20378)	10.5891	4.48907	13.1359	3.61594
	89	cg16080125	chr 7: 2774654	0.0366136	0.00147127	0.676137	3.18029	AMZ1	32545	GNA12	Body	AMZ1 (+55492)	GNA12 (+109304)	28.3857	5.23471	31.0039	5.40472
	90	cg20445053	chr 2: 169440359	0.0311841	8.6739e-05	0.461884	3.92497	MIR4774	907	LASS6	Body	NOSTRIN (-218531)	CERS6 (+127525)	1.89437	4.3549	3.89341	5.10206
	91	cg24859236	chr 1: 9750213	-0.0322546	0.00043806	0.590112	-3.51602	PIK3CD	-1311	PIK3CD	5'UTR	PIK3CD (+38424)	CLSTN1 (+134336)	2.68949	3.75718	-1.50418	4.6296
	92	cg05338610	chr 20: 3775375	0.0407232	0.00188017	0.676137	3.10854	CDC25B	-1010	CDC25B;CDC25B;CDC25B	TSS1500;TSS1500;TSS1500	CDC25B (-1025)		11.7134	5.87981	15.0614	5.4434
	93	cg16995791	chr 1: 59703067	-0.0471185	0.00214442	0.695074	-3.06947	FGGY	-59557			JUN (-453283)	FGGY (-59557)	2.717	8.13498	-0.50617	7.64101
	94	cg05504270	chr 16: 72130759	0.0310059	0.000141986	0.461884	3.80468	DHX38	39	DHX38	Body	TXNL4B (-2992)		-1.01022	3.33135	2.13295	3.57184
	95	cg27128042	chr 16: 2507614	0.0357312	0.00151371	0.676137	3.17204	C16orf59	-2500	CCNF	3'UTR	NTN3 (-13885)	CCNF (+28220)	4.389	5.53922	7.89575	4.69448
	96	cg03709468	chr 4: 156828285	-0.0347059	0.00132909	0.668275	-3.20962	TDO2	3439	TDO2	Body	TDO2 (+3439)	CTSO (+46762)	5.24469	5.07426	2.15266	5.15619
	97	cg11841652	chr 19: 1569056	0.0324035	0.000641597	0.60936	3.41339	MEX3D	-999	MEX3D	TSS1500	MEX3D (-1000)		4.53201	4.53191	6.97332	4.39895
	98	cg24852135	chr 7: 69597700	0.0312731	0.000350743	0.562141	3.57462	AUTS2	533796	AUTS2;AUTS2;AUTS2	Body;Body;Body	AUTS2 (+533796)		2.27959	4.2586	4.95418	4.17349
	99	cg15742468	chr 6: 151643632	0.0385478	0.00198647	0.679627	3.09225	AKAP12	-3033	AKAP12	Body	ZBTB2 (+69044)	AKAP12 (+82499)	6.02008	5.97822	8.87389	6.31008
	100	cg24938659	chr 19: 46649840	-0.0375859	0.00190487	0.676137	-3.10468	IGFL2	-1198	IGFL2	TSS1500	IGFL2 (-1659)		3.55788	6.31995	1.0221	5.27452
	101	cg11883737	chr 3: 129276179	0.033349	0.00103672	0.617879	3.28037	PLXND1	1361	PLXND1	Body	H1FOO (+14123)	PLXND1 (+49402)	6.98068	3.73852	9.99751	4.90403
	102	cg17327331	chr 14: 67736448	-0.0322184	0.000675746	0.60936	-3.39924	5S_rRNA	9505	MPP5	5'UTR	MPP5 (+28428)	ATP6V1D (+90271)	3.16725	5.6748	-0.244266	4.12362
	103	cg26332535	chr 17: 78803184	0.0360453	0.00173436	0.676137	3.13231	RPTOR	-120051	RPTOR;RPTOR	Body;Body	CHMP6 (-162456)	RPTOR (+284560)	3.54484	5.69113	6.54335	5.30844
	104	cg24420089	chr 11: 457304	0.0313485	0.000446513	0.590112	3.51095	PTDSS2	7025	PTDSS2	Body	PTDSS2 (+7025)	RNH1 (+49516)	5.0527	5.47679	8.3448	4.68245
	105	cg02918593	chr 14: 105184145	0.0311156	0.000356083	0.562141	3.57066	ADSSL1	-6388	INF2;INF2	Body;3'UTR	ADSSL1 (-12082)	INF2 (+28203)	2.9599	3.86823	5.85182	3.59338
	106	cg20934892	chr 17: 49248584	-0.0315845	0.000548493	0.599465	-3.45588	NME2	4502	NME2;NME2;NME2;NME1-NME2;NME2	Body;Body;Body;Body;Body	NME1-NME2 (+17688)	MBTD1 (+88842)	3.76953	4.49839	0.950254	4.35429
	107	cg02794358	chr 2: 54816818	-0.0356676	0.00173384	0.676137	-3.1324	SPTBN1	31288	SPTBN1;SPTBN1	Body;Body	EML6 (-135330)	RPL23AP32 (+60460)	12.6472	5.51349	9.09593	4.39127
	108	cg15779843	chr 7: 7678631	0.0351926	0.00167665	0.676137	3.14223	LOC729852	-1710	RPA3	Body	COL28A1 (-103172)	RPA3 (+79606)	3.9588	5.19709	7.46322	5.03116
	109	cg07889936	chr 6: 30616472	0.0345687	0.00154431	0.676137	3.16623	C6orf136	1657	C6orf136;C6orf136;C6orf136	Body;Body;Body	C6orf136 (+1657)	DHX16 (+24357)	5.92185	5.35121	7.89241	6.02025
	110	cg12404745	chr 1: 89846031	-0.0363782	0.00187908	0.676137	-3.10871	GBP6	16596	GBP6	Body	LRRC8B (-144365)	GBP6 (+16596)	2.82541	5.5895	0.0455442	5.67396
	111	cg02483043	chr 10: 134536498	-0.0363919	0.00188785	0.676137	-3.10733	NKX6-2	63039	INPP5A	Body	NKX6-2 (+63038)	INPP5A (+185146)	10.4497	5.42593	6.93544	5.3784
	112	cg20092736	chr 11: 67982703	0.0332963	0.00120657	0.649585	3.23732	SUV420H1	-1635			SUV420H1 (-1920)		20.2492	4.66997	23.1888	4.90901
	113	cg03047946	chr 22: 41258266	0.0309058	0.000420384	0.586538	3.52694	XPNPEP3	6	XPNPEP3;DNAJB7	Body;TSS200	DNAJB7 (-137)		13.403	4.28838	15.6766	4.43861
	114	cg24674754	chr 1: 150537574	-0.0325519	0.000991844	0.617879	-3.29283	ADAMTSL4	7154			MCL1 (+14639)	ADAMTSL4 (+15677)	16.4918	4.19603	12.8164	4.41797
	115	cg03292992	chr 11: 33759043	-0.0309399	0.000478694	0.591773	-3.4924	CD59	-1018	CD59;CD59;CD59;CD59	TSS1500;TSS1500;TSS1500;TSS1500	CD59 (-14771)	FBXO3 (+37027)	20.9014	4.20502	17.7336	3.70933
	116	cg26437845	chr 1: 11779326	0.0349159	0.0017291	0.676137	3.1332	AK125437	-2860	C1orf187	Body	AGTRAP (-16815)	C1orf187 (+27546)	22.6323	4.88267	25.8603	4.67277
	117	cg00354484	chr 2: 114007283	-0.0318938	0.000787078	0.617879	-3.3573	LOC654433	13438	PAX8;PAX8;LOC654433;PAX8;PAX8;PAX8;LOC440839	Body;Body;Body;Body;Body;Body;Body	PAX8 (+29214)	PSD4 (+75724)	14.8701	3.79829	11.5802	4.32829
	118	cg10023855	chr 6: 32710516	-0.0307139	0.000415749	0.584638	-3.52988	HLA-DQA2	1354	HLA-DQA2	Body	HLA-DQA2 (+1354)	HLA-DQB2 (+20813)	1.70761	4.06126	-1.13369	3.67974
	119	cg09731946	chr 21: 45336903	0.0370245	0.00218363	0.695074	3.06405	AGPAT3	-8375	AGPAT3	5'UTR	TRAPPC10 (-95302)	AGPAT3 (+51788)	23.2357	6.13057	26.284	5.72617
	120	cg01591405	chr 17: 18024867	0.0321398	0.000873304	0.617879	3.32845	MYO15A	2972	MYO15A	Body	ALKBH5 (-61999)	MYO15A (+12848)	1.792	4.25766	4.59432	4.28338
	121	cg00575153	chr 8: 145047469	0.0425588	0.0024913	0.695074	3.0244	PLEC	228	PLEC1;PLEC1	Body;Body	PLEC (-22426)	PARP10 (+13165)	-1.61248	6.54531	1.38788	7.41942
	122	cg26484813	chr 11: 62311573	-0.034628	0.0017132	0.676137	-3.13591	AHNAK	2759	AHNAK;AHNAK	5'UTR;5'UTR	AHNAK (+2758)	SCGB1A1 (+125067)	5.14724	5.58042	1.54498	5.50562
	123	cg25114011	chr 13: 113104071	0.0343152	0.00167856	0.676137	3.1419	SPACA7	73421			SPACA7 (+73421)	TUBGCP3 (+138409)	-1.41189	5.7265	1.62253	5.11789
	124	cg27365991	chr 5: 123036376	-0.0302433	0.000244147	0.480574	-3.66832	CSNK1G3	155266			CSNK1G3 (+188584)		6.12382	3.79185	2.15072	4.2817
	125	cg24768167	chr 14: 21104434	0.0356437	0.00193846	0.676156	3.0995	TRNA_Pro	3270			RNASE12 (-45453)	OR6S1 (+5415)	0.813475	5.26933	4.06285	4.78252
	126	cg09225287	chr 7: 80549171	0.0368901	0.00230254	0.695074	3.04815	SEMA3C	-504	SEMA3C	TSS1500	SEMA3C (-505)		13.4225	5.23326	16.6041	4.92445
	127	cg10313947	chr 11: 124622815	0.0296339	2.35296e-05	0.393009	4.22846	VSIG2	-706	VSIG2	TSS1500	VSIG2 (-707)		16.8293	3.07692	19.6998	3.04
	128	cg00539347	chr 22: 30592296	0.0338336	0.00165293	0.676137	3.1464	MGC20647	-49902			LIF (+50499)	HORMAD2 (+115844)	19.5931	4.37319	22.785	4.90924
	129	cg19592472	chr 20: 3052274	0.0318511	0.000944305	0.617879	3.30662	OXT	9	OXT;OXT	1stExon;5'UTR	OXT (+9)		12.9912	4.09518	17.3848	5.25417
	130	cg06215984	chr 1: 203258903	0.0312877	0.000791408	0.617879	3.35578	LOC730227	15550			CHIT1 (-60044)	BTG2 (-15760)	15.4644	3.86221	18.3809	4.86545
	131	cg20852250	chr 3: 72149422	0.036841	0.00235622	0.695074	3.04122	AK097190	156			PROK2 (-315066)	RYBP (+346351)	25.8404	5.89141	28.8348	4.77426
	132	cg25966908	chr 7: 55516751	0.0472815	0.0027776	0.695074	2.99134	LANCL2	83611			LANCL2 (+83611)	VOPP1 (+123448)	0.912703	7.27593	4.59626	8.41523
	133	cg08183300	chr 15: 72770749	-0.0342667	0.00179976	0.676137	-3.12143	ARIH1	4083	ARIH1	Body	BBS4 (-207770)	ARIH1 (+4083)	10.0136	4.81299	6.58313	5.30345
	134	cg23902994	chr 8: 1814932	-0.0340006	0.00171482	0.676137	-3.13563	BC047307	-2505	ARHGEF10	Body	MYOM2 (-178225)	ARHGEF10 (+42784)	8.71241	5.2841	5.28059	4.77915
	135	cg14938587	chr 7: 155790392	0.0305913	0.000580126	0.599465	3.44074	Mir_598	-63718			SHH (-185426)	C7orf13 (+642955)	-0.579884	4.27694	2.27853	3.36291
	136	cg23317604	chr 5: 112574450	-0.0343629	0.00186442	0.676137	-3.11102	MCC	56162	MCC;MCC	Body;Body	TSSK1B (+196277)	DCP2 (+262044)	8.39228	4.62814	5.05144	4.69773
	137	cg03423497	chr 4: 39448432	-0.0321585	0.00111102	0.631903	-3.26079	RPL9	11775	KLB	Body	RPL9 (+11774)	KLB (+39960)	4.28156	4.81512	0.94335	4.37714
	138	cg21662240	chr 8: 74945742	0.0299437	0.000247565	0.480574	3.66477	U6	-15169			LY96 (+42179)	JPH1 (+287819)	5.80042	3.60069	8.31802	3.62743
	139	cg03003394	chr 2: 208026398	-0.0297764	0.00019273	0.461884	-3.72836	KLF7	4216	KLF7	Body	KLF7 (+4215)	CPO (+222121)	11.2119	4.10554	7.95606	4.12471
	140	cg03734401	chr 17: 71198198	-0.0298497	0.000242982	0.480574	-3.66955	COG1	9026	COG1	Body	C17orf80 (-30577)	COG1 (+9026)	4.32239	3.44654	1.43645	3.44358
	141	cg12100242	chr 21: 38574170	-0.0357835	0.00226681	0.695074	-3.05285	DSCR9	-6633	TTC3;TTC3	3'UTR;3'UTR	DSCR3 (+65662)	TTC3 (+128600)	5.62557	5.55036	2.11244	5.32688
	142	cg00589737	chr 5: 77252276	0.0343367	0.00193321	0.676137	3.10031	TRNA_Pseudo	66572			TBCA (-180092)	AP3B1 (+338251)	6.72884	4.97193	9.47918	5.24517
	143	cg26396370	chr 2: 10194752	0.0361929	0.00240637	0.695074	3.03487	KLF11	10381	KLF11	3'UTR	KLF11 (+11071)	CYS1 (+25785)	7.43765	5.48007	9.68464	5.74812
	144	cg10428536	chr 7: 134870726	0.0301581	0.000560751	0.599465	3.44992	C7orf49	-15148	WDR91	3'UTR	STRA8 (-46004)	C7orf49 (-15149)	7.18813	3.53192	9.86288	4.01218
	145	cg12853742	chr 14: 24780890	-0.0328614	0.00166333	0.676137	-3.14457	LTB4R	186	LTB4R;LTB4R2;LTB4R2;LTB4R2;LTB4R;CIDEB;LTB4R	5'UTR;Body;1stExon;Body;TSS1500;TSS1500;1stExon	CIDEB (-315)	LTB4R (+186)	26.6644	4.66533	23.8957	4.87133
	146	cg24697460	chr 12: 124908653	-0.0429562	0.00299936	0.704642	-2.9678	BC017209	-59589	NCOR2;NCOR2	Body;Body	NCOR2 (+143356)	ZNF664 (+450892)	18.1211	7.16105	13.1682	5.98639
	147	cg04401067	chr 1: 9902439	-0.0295563	0.000219739	0.478579	-3.69517	CLSTN1	-17889			CLSTN1 (-17890)	CTNNBIP1 (+67876)	10.7647	3.78541	7.42691	4.09583
	148	cg23518214	chr 3: 107240645	-0.0303597	0.000758122	0.617879	-3.36765	BBX	-1137	BBX;BBX	TSS1500;TSS1500	BBX (-1137)		10.0371	3.96915	7.23765	4.56288
	149	cg20813589	chr 11: 504930	0.0330804	0.00180032	0.676137	3.12134	RNH1	-1360	RNH1;RNH1;RNH1;RNH1;RNH1;RNH1;RNH1;RNH1	5'UTR;5'UTR;5'UTR;5'UTR;5'UTR;5'UTR;5'UTR;5'UTR	RNH1 (+1890)	PTDSS2 (+54651)	14.4468	5.1075	16.8059	4.44469
	150	cg12421116	chr 1: 64269557	-0.0310606	0.00104524	0.617879	-3.27806	Mir_544	-7429	ROR1;ROR1	Body;Body	UBE2U (-399932)	ROR1 (+29868)	3.49677	3.6855	0.41815	4.31475
	151	cg18162767	chr 13: 75904093	0.0349427	0.0024283	0.695074	3.03214	TBC1D4	-13354	TBC1D4	Body	TBC1D4 (+152156)		12.3993	5.20143	15.0429	6.08339
	152	cg27094173	chr 11: 73371753	-0.0300286	0.000720938	0.617879	-3.38149	PLEKHB1	12019	PLEKHB1;PLEKHB1;PLEKHB1;PLEKHB1;PLEKHB1	Body;Body;Body;Body;Body	PLEKHB1 (+13160)	RAB6A (+100447)	10.2717	3.92755	6.57589	4.03295
	153	cg05800983	chr 6: 34102530	-0.0305266	0.000986641	0.617879	-3.29431	GRM4	-894	GRM4	TSS1500	GRM4 (-895)		3.48969	3.79757	0.443131	4.14675
	154	cg11963202	chr 7: 98985799	0.0297362	0.000571498	0.599465	3.44479	ARPC1B	13502	ARPC1B	Body	ARPC1B (+13502)	PDAP1 (+20505)	0.414856	3.26545	3.26948	4.09722
	155	cg05581394	chr 12: 40500619	0.029702	0.000547843	0.599465	3.4562	SLC2A13	-958	SLC2A13	TSS1500	SLC2A13 (-959)		8.07921	2.86407	10.6846	4.07872
	156	cg25609307	chr 11: 10550449	-0.0301081	0.00078674	0.617879	-3.35742	RNF141	12325	RNF141	Body	MTRNR2L8 (-19727)	RNF141 (+12324)	2.64777	4.97813	0.21903	4.10558
	157	cg19257864	chr 1: 155211736	0.0299624	0.000728701	0.617879	3.37855	GBA	-667	GBA;GBA;GBA;GBA;GBA	5'UTR;TSS1500;5'UTR;5'UTR;5'UTR	GBA (+2916)	MTX1 (+33247)	2.76314	4.53575	4.99847	4.45931
	158	cg15061954	chr 12: 32299085	0.0419174	0.0031843	0.704642	2.94936	BICD1	38901	BICD1;BICD1	Body;Body	FGD4 (-355955)	BICD1 (+38901)	4.46516	5.39486	9.02136	6.64184
	159	cg14947634	chr 10: 101542587	-0.0317089	0.00150176	0.676137	-3.17434	ABCC2	125	ABCC2;ABCC2	1stExon;5'UTR	ABCC2 (+125)		2.65551	5.03137	0.0839515	3.96739
	160	cg23987137	chr 5: 58653624	-0.0306669	0.00105493	0.617879	-3.27545	PDE4D	-897	PDE4D;PDE4D;PDE4D	Body;Body;Body	PDE4D (+535996)	RAB3C (+774686)	8.20254	5.20013	4.01216	4.62088
	161	cg19890774	chr 11: 123115119	0.0380302	0.00303539	0.704642	2.96413	CLMP	-49112			GRAMD1B (-281408)	CLMP (-49113)	-1.01586	4.17329	3.25961	6.65743
	162	cg26880297	chr 1: 2191299	0.0303354	0.00102426	0.617879	3.28378	SKI	31166	SKI	Body	RER1 (-131914)	SKI (+31166)	9.34922	3.92925	11.4686	4.85652
	163	cg02420724	chr 2: 190044983	-0.0318213	0.00163611	0.676137	-3.14939	COL5A2	-378	COL5A2	TSS1500	COL5A2 (-379)		12.0684	5.16481	9.07764	3.98823
	164	cg05812666	chr 1: 231954814	-0.0318877	0.00167332	0.676137	-3.14281	DISC2	-551	TSNAX-DISC1;DISC1;DISC1;TSNAX-DISC1;DISC1;DISC1;DISC1;DISC1;TSNAX-DISC1;DISC1;TSNAX-DISC1;DISC1;DISC2;DISC1;DISC1;DISC1;DISC1;TSNAX-DISC1;DISC1;TSNAX-DISC1;DISC1;DISC1	Body;3'UTR;Body;Body;3'UTR;Body;Body;Body;Body;Body;Body;3'UTR;TSS1500;Body;Body;3'UTR;Body;Body;Body;Body;Body;Body	DISC1 (+192254)	SIPA1L2 (+696428)	7.9096	4.56652	4.83607	4.75647
	165	cg08923624	chr 4: 725336	0.0365148	0.00293083	0.704642	2.9749	PCGF3	-2336	PCGF3	5'UTR	PCGF3 (+25764)	CPLX1 (+94608)	2.44854	5.86745	5.61865	5.0147
	166	cg14120896	chr 19: 56086441	0.0333911	0.00220765	0.695074	3.06078	ZNF579	4564			SGK110 (-29533)	ZNF579 (+5769)	-0.0613468	5.11397	3.67036	5.07947
	167	cg19407682	chr 11: 78669177	-0.0344576	0.0025165	0.695074	-3.02135	ODZ4	4221	ODZ4	Body	NARS2 (-383269)	ODZ4 (+482517)	9.11184	5.64783	6.29794	5.12792
	168	cg18550846	chr 20: 48767148	0.0301574	0.000958905	0.617879	3.30231	TMEM189	3187	TMEM189;TMEM189-UBE2V1;TMEM189;TMEM189	Body;Body;Body;Body	TMEM189-UBE2V1 (+3186)	SNAI1 (+167636)	5.61385	4.03728	7.87938	4.62707
	169	cg11382529	chr 8: 65490613	0.0320102	0.00171245	0.676137	3.13604	LOC401463	-793	LOC401463	TSS1500	BHLHE22 (-2181)		12.8993	5.02297	15.2224	4.16446
	170	cg26646527	chr 18: 77333373	-0.0315634	0.00158506	0.676137	-3.15864	NFATC1	46255			CTDP1 (-106427)	NFATC1 (+173048)	4.75456	4.58182	1.89599	4.26259
	171	cg01057573	chr 5: 118683890	0.0311202	0.00143675	0.676137	3.18716	TNFAIP8	-7705	TNFAIP8	Body	TNFAIP8 (-7705)		8.43589	4.27441	10.9736	4.38966
	172	cg02977575	chr 1: 156046832	-0.0346077	0.00258174	0.695074	-3.01359	MEX3A	4957	MEX3A	Body	MEX3A (+4956)	RAB25 (+15867)	10.5015	4.71432	7.44493	5.25475
	173	cg25792718	chr 11: 107879063	-0.0306197	0.00121671	0.649585	-3.23493	CUL5	-344	CUL5	TSS1500	CUL5 (-344)		20.5682	4.6977	17.0088	4.45165
	174	cg22259724	chr 17: 7479880	-0.0291553	0.000356663	0.562141	-3.57023	SNORD10	-248	EIF4A1;SNORA67;SNORD10	Body;TSS1500;TSS1500	CD68 (-2924)		3.25814	3.95073	0.115953	4.24502
	175	cg26319169	chr 15: 65870540	-0.0304339	0.00112409	0.633498	-3.25747	C15orf44	32934	PTPLAD1	3'UTR	C15orf44 (+33086)	PTPLAD1 (+47714)	15.5274	4.10996	11.647	4.95234
	176	cg25455773	chr 12: 133028201	0.0330966	0.00219208	0.695074	3.06289	FBRSL1	-38955			P2RX2 (-167201)	GALNT9 (-122297)	-0.918671	5.37964	2.63847	3.90857
	177	cg16908552	chr 1: 231174153	-0.0364583	0.00303842	0.704642	-2.96382	FAM89A	1842	FAM89A	Body	TRIM67 (-124520)	ARV1 (+59331)	7.77941	4.94169	3.09027	5.90418
	178	cg00539564	chr 22: 43254081	-0.0530516	0.00373064	0.726084	-2.90008	ARFGAP3	-673	ARFGAP3;ARFGAP3	TSS1500;TSS1500	ARFGAP3 (-674)		18.9916	7.22628	12.8893	8.37576
	179	cg03797957	chr 11: 57424401	0.0349569	0.00274682	0.695074	2.99474	CLP1	-814	CLP1;CLP1	TSS1500;TSS1500	CLP1 (-814)		2.76045	4.99691	5.99242	5.0147
	180	cg18448746	chr 17: 27039132	0.0330702	0.00222429	0.695074	3.05853	PROCA1	-260	PROCA1	TSS1500	PROCA1 (-261)		9.22339	5.16631	12.0869	4.50597
	181	cg23323712	chr 11: 63851382	0.0480655	0.00369901	0.72595	2.90275	FLRT1	-19979	MACROD1	Body	FLRT1 (-19979)	OTUB1 (+98058)	1.47374	7.63208	5.21491	8.50879
	182	cg10482632	chr 1: 201476606	0.0287008	0.000200941	0.465243	3.71783	CSRP1	-219	CSRP1;CSRP1	TSS1500;TSS1500	CSRP1 (-640)		12.3733	3.6289	14.8149	3.48055
	183	cg21249771	chr 2: 242484705	0.0332413	0.00239619	0.695074	3.03615	BOK	-13440			STK25 (-36672)	BOK (-13440)	1.33159	4.80671	3.98917	4.98407
	184	cg05308639	chr 19: 1525316	0.0451008	0.0037548	0.726084	2.89806	PLK5	359	PLK5P	Body	PLK5 (+1244)	MEX3D (+42740)	5.93354	6.15531	10.3657	6.8184
	185	cg25643644	chr 11: 118210017	-0.0335374	0.00252133	0.695074	-3.02077	CD3D	3442	CD3D;CD3D	Body;Body	CD3D (+3441)	CD3E (+34723)	2.69518	5.00801	-0.330755	4.25904
	186	cg25815219	chr 7: 31827390	-0.0335528	0.00254749	0.695074	-3.01764	BC043188	709			PPP1R17 (+100760)	PDE1C (+510992)	10.2911	5.25955	6.97257	5.21224
	187	cg03166508	chr 10: 89453226	-0.0357733	0.00307873	0.704642	-2.95977	PAPSS2	32515	PAPSS2;PAPSS2	Body;Body	PAPSS2 (+33751)	ATAD1 (+124690)	9.17413	5.69169	6.06915	5.48664
	188	cg05822618	chr 1: 179027455	0.0331806	0.00243405	0.695074	3.03142	TOR3A	-23656	FAM20B	Body	TOR3A (-23656)	FAM20B (+32382)	6.86153	5.61645	10.0514	5.50165
	189	cg07469700	chr 4: 115785488	-0.0332371	0.00246012	0.695074	-3.0282	Metazoa_SRP	65002	NDST4	Body	NDST4 (+249543)	UGT8 (+265878)	5.58943	5.1991	1.99893	4.61444
	190	cg07113653	chr 6: 13428657	0.0359431	0.00316148	0.704642	2.95158	GFOD1	-20288	GFOD1	Body	TBC1D7 (-99871)	GFOD1 (+59211)	17.4917	5.0178	20.431	5.4319
	191	cg12126243	chr 14: 59742285	-0.0328975	0.00240476	0.695074	-3.03507	DAAM1	-79597	DAAM1	Body	DAAM1 (+86887)	GPR135 (+189773)	9.29408	4.75962	5.80302	4.52391
	192	cg25019648	chr 17: 72353261	-0.0427472	0.00378951	0.726084	-2.89517	BTBD17	4697	BTBD17	Body	BTBD17 (+4696)	KIF19 (+30911)	8.98087	7.33351	4.79185	7.06795
	193	cg02487233	chr 3: 107810687	-0.0561844	0.00400574	0.726995	-2.87771	CD47	-752	CD47;CD47;CD47	TSS1500;TSS1500;TSS1500	CD47 (-753)		9.29903	9.72549	2.90608	8.17387
	194	cg16667251	chr 2: 54697181	0.0302989	0.00148185	0.676137	3.17821	SPTBN1	12784	SPTBN1	5'UTR	RPL23AP32 (-59177)	SPTBN1 (+13728)	8.60103	4.0228	11.1491	4.66691
	195	cg17724627	chr 12: 50041367	-0.0290242	0.000632365	0.60936	-3.41734	FMNL3	4658	FMNL3;FMNL3	Body;Body	PRPF40B (+17040)	FMNL3 (+59829)	28.7647	4.35919	25.1115	4.00021
	196	cg15244101	chr 12: 49627624	0.0282619	0.00012984	0.461884	3.82676	TUBA1C	5916			TUBA1A (-44764)	TUBA1C (-31240)	9.10104	3.21046	11.7133	3.05709
	197	cg10825710	chr 12: 1738337	-0.0356921	0.00323473	0.704642	-2.9445	WNT5B	-74	WNT5B;WNT5B	TSS200;5'UTR	WNT5B (-74)		18.1423	6.00268	14.0391	6.00425
	198	cg26630859	chr 5: 173738315	0.0315552	0.00204059	0.686846	3.08426	HMP19	220084			MSX2 (-413259)	HMP19 (+265592)	-0.73888	4.25639	2.25691	4.28153
	199	cg07249742	chr 3: 124570104	-0.0417756	0.00389969	0.726245	-2.88616	ITGB5	-33547	ITGB5	Body	ITGB5 (+36039)	UMPS (+120892)	12.2172	6.7619	7.35063	6.85731
	200	cg10524161	chr 12: 132407477	0.0290579	0.0007868	0.617879	3.3574	PUS1	-6267	ULK1	3'UTR	PUS1 (-6335)	ULK1 (+28199)	7.68534	3.23534	9.9766	4.48368
	201	cg06958937	chr 3: 184045017	-0.0327545	0.00261388	0.695074	-3.00984	SNORD66	1534	EIF4G1;EIF4G1;EIF4G1;EIF4G1;EIF4G1	Body;Body;Body;Body;Body	FAM131A (-10258)	EIF4G1 (+12735)	6.7923	5.27939	3.60675	4.21903
	202	cg20916427	chr 18: 44627440	-0.0318369	0.00227418	0.695074	-3.05187	HDHD2	49431	KATNAL2	3'UTR	TCEB3B (-65453)	HDHD2 (+49430)	10.9574	4.57813	7.4399	4.49408
	203	cg22794983	chr 13: 113661868	0.0409103	0.00402183	0.726995	2.87644	MCF2L	5841	MCF2L;MCF2L	Body;Body	F7 (-98236)	MCF2L (+38334)	8.6896	6.15937	12.4538	6.12687
	204	cg21435172	chr 12: 19417219	0.0348546	0.00324519	0.704797	2.9435	PLEKHA5	9241	PLEKHA5;PLEKHA5	Body;Body	AEBP2 (-175388)	PLEKHA5 (+134594)	10.4317	6.53396	13.8959	5.41975
	205	cg13979800	chr 9: 140469108	-0.0291112	0.000923406	0.617879	-3.31288	WDR85	4265	WDR85	Body	WDR85 (+4278)	MRPL41 (+22800)	8.07276	3.93744	4.59486	4.75775
	206	cg27102995	chr 7: 28221194	-0.0350927	0.00331672	0.706845	-2.93675	JAZF1	-757	JAZF1	TSS1500	JAZF1 (-758)		12.249	5.53016	9.18135	4.60984
	207	cg03020006	chr 2: 202483740	-0.0286861	0.000653046	0.60936	-3.40857	ALS2CR11	165	ALS2CR11;ALS2CR11;ALS2CR11;ALS2CR11	1stExon;1stExon;1stExon;1stExon	TMEM237 (+24483)	STRADB (+167349)	12.2351	3.86311	9.99453	3.73131
	208	cg21832243	chr 21: 38444223	-0.0279659	0.000136285	0.461884	-3.81482	PIGP	880	TTC3;PIGP;PIGP;PIGP	TSS1500;Body;Body;Body	TTC3 (-1347)	PIGP (+879)	3.37858	3.87212	0.60203	2.99721
	209	cg04692454	chr 6: 99275305	-0.0342421	0.00318947	0.704642	-2.94886	POU3F2	-7274			POU3F2 (-7274)		7.4197	5.4686	4.44726	4.9305
	210	cg21531689	chr 2: 220253653	0.0331572	0.00285032	0.697317	2.98344	DNPEP	-55	DNPEP	TSS1500	DNPEP (-992)		12.6836	4.17867	15.3194	5.13437
	211	cg14006376	chr 17: 40387836	0.0323657	0.00264015	0.695074	3.0068	STAT5B	40588	STAT5B	5'UTR	GHDC (-41287)	STAT5B (+40587)	12.2482	4.90148	14.8422	4.60351
	212	cg05526036	chr 1: 235612115	0.0391352	0.004048	0.726995	2.8744	B3GALNT2	55666	TBCE;TBCE;B3GALNT2	3'UTR;3'UTR;3'UTR	B3GALNT2 (+55665)	TBCE (+81388)	3.35625	6.19353	6.16218	6.14463
	213	cg15235893	chr 2: 235406363	-0.0280545	0.000236134	0.480574	-3.67685	ARL4C	-670	ARL4C	TSS1500	ARL4C (-671)		10.1863	3.90811	7.31642	3.74725
	214	cg18822598	chr 10: 124670078	0.0294767	0.00134654	0.668275	3.20587	FAM24A	-138	FAM24A	TSS200	FAM24A (-138)		2.90359	4.33383	5.3843	3.81374
	215	cg25375029	chr 1: 244820484	-0.0284182	0.000615869	0.60809	-3.42453	PPPDE1	4133	PPPDE1	Body	FAM36A (-178154)	C1orf101 (+195812)	17.7215	3.13339	14.6333	3.85761
	216	cg20063095	chr 2: 134977141	0.0318862	0.00253131	0.695074	3.01957	MGAT5	-34688			NCKAP5 (-651111)	MGAT5 (-34688)	9.18881	4.92996	11.2127	4.82812
	217	cg07096218	chr 1: 95581952	-0.0314184	0.00240828	0.695074	-3.03463	TMEM56	-941	TMEM56	TSS1500	TMEM56 (-941)		9.55446	4.88421	6.35798	5.29779
	218	cg07828340	chr 4: 882639	-0.0276212	2.64073e-05	0.393009	-4.20242	GAK	-16078	GAK	Body	CPLX1 (-62695)	GAK (+43534)	6.25859	2.74412	3.54816	2.72939
	219	cg23600322	chr 18: 3457201	-0.0351277	0.00365375	0.723817	-2.9066	TGIF1	1790	TGIF1;TGIF1;TGIF1;TGIF1;TGIF1;TGIF1;TGIF1;TGIF1	Body;Body;Body;Body;Body;Body;Body;Body	TGIF1 (+5611)	DLGAP1 (+998064)	11.5825	5.41065	8.41698	5.31511
	220	cg05998295	chr 8: 21775764	0.033919	0.00325225	0.704797	2.94283	XPO7	-1415	XPO7;XPO7	TSS1500;TSS1500	DOK2 (-4560)	XPO7 (-1415)	10.4467	4.87824	12.692	5.35576
	221	cg02103653	chr 5: 111504758	0.0313756	0.00244366	0.695074	3.03023	EPB41L4A	1214	EPB41L4A	Body	NREP (-192131)	EPB41L4A (+250251)	6.93784	4.11178	9.62577	4.90922
	222	cg02890642	chr 1: 184017798	0.0317375	0.00258959	0.695074	3.01267	TSEN15	-3012			TSEN15 (-3012)		-1.67898	6.00616	2.09921	5.45225
	223	cg22315922	chr 6: 56622531	0.0296759	0.00167435	0.676137	3.14263	DST	-64430	DST;DST;DST;DST	Body;Body;Body;Body	KIAA1586 (-288852)	DST (-114838)	4.71855	3.52999	7.92331	4.53473
	224	cg12623107	chr 11: 18346401	0.0355298	0.00379755	0.726084	2.89451	GTF2H1	2586	GTF2H1;GTF2H1	5'UTR;5'UTR	HPS5 (-2681)	GTF2H1 (+2586)	-1.04095	6.57489	1.68271	7.05721
	225	cg24907762	chr 10: 45497989	-0.0297717	0.00172009	0.676137	-3.13474	ZNF22	-827	ZNF22	5'UTR	C10orf25 (-1520)		13.0266	4.1123	10.1569	4.70064
	226	cg03013832	chr 5: 610376	0.0324366	0.00284534	0.697317	2.98397	CEP72	-2028			CEP72 (-2028)		4.05217	4.56274	6.62532	4.79309
	227	cg09579760	chr 1: 163132916	0.0387194	0.00431432	0.733186	2.85422	RGS5	40047	RGS5	Body	RGS5 (+40046)	RGS4 (+94521)	1.12683	6.04517	4.91818	5.48931
	228	cg20172156	chr 7: 115970652	0.035197	0.00379492	0.726084	2.89472	DQ656011	-40547			CAV2 (-169002)	TES (+120106)	-0.645132	5.99394	2.75801	5.66915
	229	cg20674206	chr 1: 63004738	0.040025	0.00439691	0.73594	2.84819	DOCK7	-3435	DOCK7	Body	ANGPTL3 (-58448)	USP1 (+102764)	7.22601	6.6669	11.529	6.34134
	230	cg05365320	chr 1: 200971339	-0.0296122	0.0016923	0.676137	-3.13951	KIF21B	3483	KIF21B	Body	KIF21B (+21488)	GPR25 (+129174)	6.44136	4.50056	3.24843	4.31089
	231	cg15444621	chr 13: 113611794	-0.0324492	0.00301528	0.704642	-2.96618	MCF2L	-10984			MCF2L (-11740)	ATP11A (+267152)	4.18522	7.49384	-0.766346	7.32954
	232	cg14368080	chr 17: 67590991	-0.0304438	0.00227238	0.695074	-3.05211	BC094791	4856			KCNJ16 (-480434)	MAP2K6 (+180154)	9.22897	4.2134	5.86783	4.36409
	233	cg02481714	chr 22: 40439396	0.0279104	0.000452388	0.590112	3.50747	TNRC6B	-1424	TNRC6B	TSS1500	TNRC6B (-134532)	GRAP2 (+142311)	0.0215923	3.39831	2.36731	3.83277
	234	cg26733846	chr 6: 112824384	-0.0363987	0.00410723	0.726995	-2.86981	RFPL4B	153474			RFPL4B (+155853)		2.77385	5.53519	-1.03371	4.91909
	235	cg15934607	chr 13: 114802548	0.0331358	0.00322792	0.704642	2.94516	RASA3	-879	RASA3	Body	GAS6 (-235503)	RASA3 (+95546)	6.77641	4.72834	9.33429	5.46819
	236	cg04070188	chr 7: 89809444	-0.032009	0.00280669	0.695074	-2.98815	STEAP2	12541			STEAP2 (-31555)	STEAP1 (+25756)	5.78181	4.57534	2.65519	4.37981
	237	cg07573020	chr 5: 14707001	0.0284289	0.00089658	0.617879	3.32112	FAM105B	42219	ANKH	3'UTR	ANKH (+164885)	TRIO (+563173)	8.47206	4.34388	11.3181	3.64673
	238	cg14415079	chr 9: 136655966	-0.0426626	0.00469407	0.744434	-2.82731	VAV2	-617	VAV2;VAV2	Body;Body	SARDH (-52488)	VAV2 (+201479)	7.98159	7.37601	3.69796	5.68883
	239	cg16058600	chr 2: 157183013	0.041989	0.00462996	0.740922	2.83171	NR4A2	1513	NR4A2	Body	NR4A2 (+6273)		0.0867252	7.2081	3.94944	6.86286
	240	cg00996323	chr 7: 139166024	-0.0369863	0.00433512	0.733186	-2.85269	KLRG2	2433	KLRG2	Body	KLRG2 (+2432)	LUC7L2 (+140128)	7.14046	5.56257	3.00848	6.2367
	241	cg05587419	chr 12: 110270636	-0.0288099	0.00123799	0.651878	-3.22998	MIR4497	-516	TRPV4;TRPV4	5'UTR;5'UTR	TRPV4 (+575)		3.37304	4.12485	0.692964	3.90191
	242	cg23250157	chr 14: 64679961	0.0286528	0.00109602	0.628938	3.26464	SYNE2	-897	SYNE2;SYNE2;SYNE2	Body;Body;TSS1500	ESR2 (+81166)	SYNE2 (+360279)	4.51297	3.72822	6.79473	4.21563
	243	cg14032089	chr 17: 57917589	-0.0340361	0.00366385	0.723817	-2.90574	MIR21	-1037	TMEM49;MIR21	3'UTR;TSS1500	TUBD1 (+52716)	VMP1 (+132727)	6.18353	5.37612	2.5634	5.07647
	244	cg27526649	chr 1: 208132004	-0.0306961	0.00248444	0.695074	-3.02523	CD34	-47321			CD34 (-47322)	PLXNA2 (+285660)	10.1236	4.83138	6.77006	3.90386
	245	cg13659813	chr 19: 39322968	-0.0296558	0.00191192	0.676137	-3.10358	ECH1	-471	ECH1	TSS1500	LGALS4 (-19229)	HNRNPL (+17648)	6.44079	3.99378	3.09535	4.27447
	246	cg20557069	chr 21: 47646604	0.0295815	0.00188869	0.676137	3.1072	LSS	2134	LSS;LSS;LSS;LSS	Body;Body;Body;Body	C21orf56 (-42232)	LSS (+2133)	1.62686	4.30881	3.82634	4.29835
	247	cg24866717	chr 19: 6375866	-0.0278786	0.000581986	0.599465	-3.43987	PSPN	-6	PSPN	TSS200	PSPN (-7)		4.69056	3.746	1.48427	3.99248
	248	cg27501645	chr 15: 41795087	0.0325725	0.0032595	0.704797	2.94214	ITPKA	9032	ITPKA	Body	ITPKA (+9032)	LTK (+10997)	19.5141	4.57922	21.9842	5.4077
	249	cg09283223	chr 16: 30066971	-0.0328844	0.00340637	0.712426	-2.92847	ALDOA	2500	ALDOA	5'UTR	FAM57B (-24786)	ALDOA (-10022)	5.65909	5.10034	2.6636	5.00682
	250	cg14516100	chr 4: 186560083	0.0408966	0.00491061	0.75835	2.81284	SORBS2	18040	SORBS2;SORBS2;SORBS2;SORBS2;SORBS2;SORBS2;SORBS2;SORBS2	Body;Body;Body;Body;Body;Body;Body;Body	PDLIM3 (-103372)	SORBS2 (+45916)	-0.442018	7.48639	4.37078	7.40266
	251	cg19386714	chr 18: 71825760	0.0381271	0.00461974	0.73995	2.83242	TIMM21	10015	C18orf55	3'UTR	TIMM21 (+10015)	CYB5A (+133490)	8.97882	8.07303	12.2568	5.10238
	252	cg20924735	chr 2: 202565040	0.0292286	0.00170788	0.676137	3.13683	MPP4	-1623	ALS2	3'UTR	MPP4 (-1624)		5.76779	4.23142	7.82774	4.98022
	253	cg15712323	chr 19: 11565399	-0.0280546	0.000805686	0.617879	-3.35083	PRKCSH	18834	ELAVL3;ELAVL3	Body;Body	PRKCSH (+19131)	ELAVL3 (+26403)	3.5051	4.46071	0.613355	3.21364
	254	cg02765363	chr 17: 80200741	-0.0320437	0.00312258	0.704642	-2.95541	SLC16A3	7092			SLC16A3 (+14460)	CSNK1D (+30852)	5.07922	3.94704	1.08322	5.97298
	255	cg01655958	chr 14: 73709663	0.0302498	0.00246103	0.695074	3.02809	BC044305	3024	PAPLN	Body	PAPLN (+5459)	NUMB (+215622)	1.67348	5.26792	4.99688	4.52568
	256	cg19503441	chr 13: 113714449	-0.0276428	0.000465901	0.590112	-3.49963	MCF2L	15481	MCF2L;MCF2L	Body;Body	F7 (-45655)	MCF2L (+90915)	8.60097	3.95203	5.51951	3.29656
	257	cg13981457	chr 10: 30887231	0.03417	0.00397842	0.726509	2.87987	LYZL2	31416			LYZL2 (+31415)	MAP3K8 (+164282)	12.6707	5.47631	15.9781	6.56781
	258	cg03402235	chr 15: 42749336	-0.0316966	0.00307646	0.704642	-2.95999	ZFP106	394	ZFP106	1stExon	ZFP106 (+393)		6.24682	4.87535	2.03613	5.73302
	259	cg13961179	chr 15: 64285879	-0.0307957	0.00277301	0.695074	-2.99184	DAPK2	52642	DAPK2	Body	HERC1 (-159733)	DAPK2 (+52641)	5.47275	4.58033	2.1745	4.24717
	260	cg21931078	chr 19: 54979339	-0.0391483	0.00493592	0.75835	-2.81119	LENG9	-4445	CDC42EP5	5'UTR	LENG9 (-4446)		11.2316	6.29567	7.49704	5.4494
	261	cg26214026	chr 12: 111926384	-0.0305894	0.00267923	0.695074	-3.00233	ATXN2	-17739	ATXN2	Body	SH2B3 (+82633)	ATXN2 (+111095)	14.566	4.49912	11.5816	4.73163
	262	cg04567302	chr 6: 31846956	-0.0320364	0.0032166	0.704642	-2.94624	SLC44A4	-133	SLC44A4	TSS200	SLC44A4 (-134)		8.39656	4.26063	5.26263	5.04731
	263	cg26617091	chr 16: 78056008	-0.0363999	0.00456159	0.739733	-2.83647	CLEC3A	-434	CLEC3A	TSS1500	CLEC3A (-434)		6.10717	5.57259	2.76161	5.66555
	264	cg15602512	chr 3: 46734393	0.0280197	0.000936365	0.617879	3.30898	ALS2CL	753	ALS2CL	5'UTR	ALS2CL (+800)		5.87926	4.23084	9.09772	3.69313
	265	cg11376354	chr 6: 33372818	0.0271307	0.000126893	0.461884	3.83241	BC146941	5279	KIFC1	Body	PHF1 (-5954)	KIFC1 (+13506)	2.36316	3.03821	5.07258	3.0611
	266	cg04961042	chr 14: 30218600	0.0357988	0.00452584	0.738708	2.83898	MIR548AI	-43992	PRKD1	Body	PRKD1 (+178298)	FOXG1 (+982314)	5.91494	6.70393	7.66173	7.5651
	267	cg06838940	chr 17: 11901614	0.0312501	0.00304834	0.704642	2.96282	ZNF18	-829	ZNF18	TSS1500	ZNF18 (-926)		18.4178	4.62394	21.0409	4.7182
	268	cg16899038	chr 10: 550564	0.0297592	0.00235517	0.695074	3.04135	DIP2C	-19460	DIP2C	Body	DIP2C (+185043)	ZMYND11 (+324631)	6.60682	5.10843	8.9228	5.37265
	269	cg17344932	chr 17: 38183730	-0.0346645	0.00428278	0.733186	-2.85655	SNORD124	-64	MED24;MED24;SNORD124	Body;Body;TSS200	CSF3 (+12117)	MED24 (+27158)	11.2516	4.7449	7.19323	5.5232
	270	cg16377959	chr 5: 3511381	-0.0276887	0.000677969	0.60936	-3.39834	LOC285577	24827			IRX1 (-84786)	C5orf38 (+759120)	2.0383	4.01272	-0.648145	3.63908
	271	cg08188779	chr 15: 45004577	0.0296766	0.00233246	0.695074	3.04427	B2M	893	B2M	Body	B2M (+893)		10.9494	4.02976	13.7143	4.13355
	272	cg10855395	chr 12: 125413124	0.0348265	0.00441559	0.737685	2.84684	TRNA_Phe	-663			UBC (-13538)	DHX37 (+60542)	9.29482	6.37762	12.1664	5.16043
	273	cg14648936	chr 13: 28812213	-0.0289748	0.00187441	0.676137	-3.10944	PAN3	63805	PAN3;PAN3	Body;Body	PAN3 (+99571)	FLT1 (+257051)	10.2054	4.16398	7.90415	4.98379
	274	cg22011804	chr 7: 150779284	-0.0275437	0.000627977	0.60936	-3.41923	TMUB1	481	FASTK;TMUB1;TMUB1;FASTK	TSS1500;Body;Body;TSS1500	AGAP3 (-4541)	FASTK (-1334)	2.46278	4.31441	-0.480031	3.53664
	275	cg00790020	chr 8: 1765477	0.0391949	0.00521932	0.76104	2.79318	MIR596	81			ARHGEF10 (-6671)	CLN8 (+53608)	15.2157	6.12666	18.7853	6.12133
	276	cg16803678	chr 3: 133941748	-0.0367644	0.00502977	0.76104	-2.80512	RYK	27838	RYK;RYK	Body;Body	SLCO2A1 (-192829)	RYK (+27837)	18.9279	5.36923	15.3348	5.47826
	277	cg16640973	chr 19: 19644143	0.0340717	0.00423867	0.730416	2.85983	YJEFN3	4474	YJEFN3	Body	CILP2 (-4930)		5.38575	5.10614	8.25292	5.35791
	278	cg25388823	chr 4: 2361876	0.0274361	0.00058397	0.599465	3.43895	ZFYVE28	4728	ZFYVE28	Body	MXD4 (-98138)	ZFYVE28 (+58493)	1.03299	3.67643	3.71932	3.78283
	279	cg01139586	chr 14: 90798784	-0.0282498	0.00135262	0.668275	-3.20458	C14orf102	-303	C14orf102;C14orf102	TSS1500;TSS1500	C14orf102 (-304)		4.9759	4.9961	2.36209	4.00795
	280	cg11062167	chr 2: 46791080	-0.0330722	0.00399108	0.726509	-2.87887	BC048424	16294	RHOQ	Body	RHOQ (+21214)	PIGF (+53170)	13.5134	4.96429	10.4038	5.23203
	281	cg06538426	chr 1: 16491125	0.0372344	0.00519941	0.76104	2.79441	EPHA2	-8543			EPHA2 (-8544)	ARHGEF19 (+47978)	6.93269	5.49601	10.2982	6.16865
	282	cg13613245	chr 9: 139390036	-0.0427219	0.00553476	0.76104	-2.77414	SEC16A	-11825	NOTCH1	3'UTR	SEC16A (-12530)	NOTCH1 (+50201)	10.9926	6.99728	5.59074	6.86181
	283	cg23314055	chr 12: 51455536	0.0363107	0.00504222	0.76104	2.80432	LETMD1	12880	CSRNP2	3'UTR	LETMD1 (+13455)	CSRNP2 (+21917)	5.92693	6.51463	8.52095	5.9528
	284	cg03114057	chr 17: 72362302	0.0273396	0.000628325	0.60936	3.41908	GPR142	-1342	GPR142	TSS1500	BTBD17 (-4345)	GPR142 (-1342)	3.3285	3.96579	5.54462	3.76598
	285	cg01923089	chr 12: 49627746	0.0276586	0.000940294	0.617879	3.30781	TUBA1C	6038			TUBA1A (-44886)	TUBA1C (-31118)	8.83292	3.82854	11.1014	3.77849
	286	cg23369670	chr 14: 104171944	-0.0285548	0.00181329	0.676137	-3.11922	XRCC3	9879	XRCC3;XRCC3;XRCC3	Body;Body;Body	XRCC3 (+9878)	KLC1 (+76420)	15.9894	4.08778	12.138	5.04675
	287	cg13572093	chr 15: 30333911	-0.0437781	0.0056761	0.762074	-2.76593	AK310526	-41982			TJP1 (-219206)	CHRFAM7A (+351952)	2.94015	7.41263	-1.23408	6.06524
	288	cg07081477	chr 17: 80254862	-0.0311879	0.00339508	0.712426	-2.9295	BC033560	-4172			CSNK1D (-23269)	CD7 (+20617)	9.75323	5.66916	7.53932	5.0424
	289	cg10096948	chr 16: 67428497	0.0357729	0.00505277	0.76104	2.80365	TPPP3	-1076	TPPP3;TPPP3;ZDHHC1	TSS1500;TSS1500;3'UTR	TPPP3 (-1077)		32.431	5.94298	35.3975	5.29156
	290	cg06878390	chr 1: 95962975	0.027504	0.000842094	0.617879	3.33857	Mir_548	7640			RWDD3 (+263265)		3.40538	3.15872	6.15316	4.13744
	291	cg20142890	chr 6: 56637688	0.0308651	0.00333535	0.707036	2.93501	DST	70775	DST;DST;DST;DST	Body;Body;Body;Body	KIAA1586 (-273695)	DST (-129995)	6.03513	4.47147	8.4112	4.66728
	292	cg26144202	chr 17: 7256361	-0.0290661	0.00228187	0.695074	-3.05086	KCTD11	1154	KCTD11	1stExon	TMEM95 (-2135)		12.5753	4.33828	9.81374	4.14932
	293	cg05898333	chr 20: 62549385	0.0268201	0.000238545	0.480574	3.67425	MIR941-1	-1392	MIR941-1;DNAJC5;MIR941-3;MIR941-2	TSS1500;5'UTR;TSS1500;TSS1500	DNAJC5 (+22931)	UCKL1 (+38414)	0.53847	3.74702	3.2885	3.53175
	294	cg18500448	chr 7: 149322992	0.0302444	0.00311279	0.704642	2.95637	ZNF767	-1111	ZNF767;ZNF767	TSS1500;TSS1500	ZNF746 (-128095)	KRBA1 (-89155)	6.96903	4.38769	9.06068	5.10197
	295	cg27150870	chr 16: 89390609	-0.0303352	0.00316592	0.704642	-2.95115	LOC100287036	3069	ANKRD11	5'UTR	ZNF778 (+106499)	ANKRD11 (+166359)	10.6334	4.71442	7.31337	4.53395
	296	cg20540306	chr 5: 153787169	-0.0410282	0.00570808	0.762074	-2.7641	FLJ38109	38213	GALNT10;GALNT10	Body;Body	SAP30L (-38347)	GALNT10 (+216875)	10.6503	6.65165	7.44183	6.76277
	297	cg14508021	chr 15: 85987419	-0.029994	0.00297053	0.704642	-2.97077	AKAP13	63549	AKAP13;AKAP13	5'UTR;5'UTR	AKAP13 (+63549)	KLHL25 (+350769)	4.46119	5.17879	1.67164	4.28489
	298	cg24996339	chr 6: 13287503	-0.029235	0.0024642	0.695074	-3.0277	LOC100130357	8315	PHACTR1	3'UTR	TBC1D7 (+41283)	PHACTR1 (+570467)	5.37748	4.02747	2.75779	3.96955
	299	cg05207107	chr 12: 56495114	-0.0331713	0.00439179	0.735773	-2.84856	PA2G4	-2988	ERBB3	Body	PA2G4 (-2988)		5.73762	5.39391	2.06713	4.9002
	300	cg10208583	chr 5: 146232064	-0.0325567	0.00419439	0.729778	-2.86316	PPP2R2B	26095	PPP2R2B;PPP2R2B;PPP2R2B;PPP2R2B;PPP2R2B;PPP2R2B;PPP2R2B	Body;Body;Body;Body;Body;Body;Body	GPR151 (-336389)	PPP2R2B (+203635)	5.34127	5.32108	1.50417	4.8396
	301	cg25888386	chr 10: 115141887	0.0321741	0.00406017	0.726995	2.87345	HABP2	-168702			HABP2 (-170890)	TCF7L2 (+431879)	11.8414	5.75953	14.7904	5.67461
	302	cg02072495	chr 15: 60689285	0.0353281	0.00520536	0.76104	2.79404	ANXA2	900	ANXA2;ANXA2;ANXA2;ANXA2	5'UTR;5'UTR;Body;5'UTR	ANXA2 (+899)		17.9328	4.37603	20.6685	6.30816
	303	cg18951352	chr 6: 149806077	0.0276034	0.00116287	0.646973	3.24783	ZC3H12D	71	ZC3H12D;ZC3H12D	5'UTR;1stExon	ZC3H12D (+70)		4.13691	4.34416	6.94818	4.66061
	304	cg15937784	chr 19: 54230170	0.02649	0.000173583	0.461884	3.75465	MIR526A2	-5	MIR526A2	TSS200	DPRX (+94861)	NLRP12 (+97477)	-0.0228971	3.40883	2.42299	2.75764
	305	cg00544573	chr 2: 210195731	0.0343121	0.00497684	0.759539	2.80853	MAP2	-93039			MAP2 (-248671)	PTH2R (+924176)	0.768317	5.73575	4.19605	5.0292
	306	cg10754395	chr 7: 158109694	0.0360615	0.0055032	0.76104	2.776	MIR595	215811	PTPRN2;PTPRN2;PTPRN2	Body;Body;Body	PTPRN2 (+270787)	DNAJB6 (+979985)	7.51902	5.37296	10.4782	6.39974
	307	cg07796563	chr 12: 133430707	-0.033674	0.00491588	0.75835	-2.8125	CHFR	23533	CHFR;CHFR;CHFR;CHFR;CHFR	Body;Body;Body;Body;Body	GOLGA3 (-25420)	CHFR (+33496)	2.15729	5.15528	-0.28765	6.01694
	308	cg00159379	chr 4: 85818877	-0.0276885	0.00140589	0.669545	-3.19344	WDFY3	-714	WDFY3;WDFY3	5'UTR;TSS1500	WDFY3 (+68666)	CDS1 (+314821)	5.33358	3.87194	2.7365	3.77518
	309	cg23300486	chr 14: 103294375	-0.0277839	0.00157429	0.676137	-3.16063	TRAF3	50560	TRAF3;TRAF3;TRAF3	5'UTR;5'UTR;5'UTR	AMN (-94617)	TRAF3 (+50560)	1.95687	4.27926	-0.442349	4.13043
	310	cg09893465	chr 10: 134588040	0.0348856	0.00535037	0.76104	2.78515	NKX6-2	11497	INPP5A	Body	NKX6-2 (+11496)	INPP5A (+236688)	4.98537	6.13692	7.85545	5.82071
	311	cg12283658	chr 7: 158702581	-0.0290366	0.00265205	0.695074	-3.00543	WDR60	25327	WDR60	Body	ESYT2 (-80263)	VIPR2 (+235067)	4.22163	5.30904	1.60937	4.74523
	312	cg16778009	chr 3: 3056548	-0.0349436	0.00537312	0.76104	-2.78377	CNTN4	-24759	CNTN4;CNTN4	Body;Body	IL5RA (+95509)	CNTN4 (+915999)	12.4231	5.43915	9.26213	5.59361
	313	cg17855222	chr 12: 106215054	-0.0301885	0.00348354	0.715914	-2.9215	NUAK1	318757			APPL2 (-585047)	NUAK1 (+318756)	14.4656	4.53962	11.5496	4.11985
	314	cg08845023	chr 10: 125767421	-0.0289292	0.00262888	0.695074	-3.0081	CPXM2	-67642	CHST15	3'UTR	CPXM2 (-115922)	CHST15 (+84508)	4.3593	3.68834	1.18415	4.84872
	315	cg08526705	chr 8: 128753029	-0.027257	0.00105868	0.617879	-3.27445	MYC	4715	MYC	Body	MYC (+4715)		6.79119	4.12223	4.3638	3.44968
	316	cg00491021	chr 8: 42064880	-0.0265217	0.000458384	0.590112	-3.50397	PLAT	314	PLAT;PLAT	5'UTR;5'UTR	PLAT (+313)		4.47213	3.5388	1.0055	3.93699
	317	cg03226435	chr 1: 3058199	-0.0262908	0.000211675	0.474444	-3.70466	MIR4251	13661	PRDM16;PRDM16	Body;Body	ARHGEF16 (-312947)	PRDM16 (+72458)	3.26951	4.02838	1.10673	3.57496
	318	cg26811313	chr 7: 1959989	0.036362	0.00575863	0.762074	2.76122	MAD1L1	20196	MAD1L1;MAD1L1;MAD1L1	Body;Body;Body	ELFN1 (+211192)	MAD1L1 (+312593)	9.87358	6.9646	13.3731	6.27631
	319	cg05894801	chr 6: 155850469	-0.0387906	0.00609837	0.762346	-2.74244	NOX3	-73432			NOX3 (-73433)		5.36819	6.24889	2.27939	7.52166
	320	cg05997059	chr 7: 116411780	-0.0427925	0.00632884	0.762346	-2.73024	CAPZA2	-39343	MET;MET	Body;Body	CAPZA2 (-90782)	MET (+99322)	3.88408	6.52956	-0.0827472	7.16912
	321	cg18110590	chr 13: 113636679	-0.0348414	0.00546498	0.76104	-2.77827	MCF2L	2698	MCF2L;MCF2L	Body;Body	F7 (-123425)	MCF2L (+13145)	7.76258	5.80001	3.5526	6.04232
	322	cg08988323	chr 5: 157255237	-0.0302194	0.0036314	0.723004	-2.90852	U6	19132	CLINT1	Body	CLINT1 (+30945)	LSM11 (+84483)	14.7787	4.68992	12.0981	4.63915
	323	cg00939649	chr 16: 66600700	-0.0425145	0.00632461	0.762346	-2.73046	CMTM1	351	CMTM1;CMTM1;CMTM1;CMTM1;CMTM1;CMTM1;CMTM1;CMTM1	Body;1stExon;Body;Body;Body;Body;Body;1stExon	CMTM1 (+351)		7.86216	6.75811	3.24919	6.7644
	324	cg23260573	chr 19: 13055829	-0.0334526	0.00511906	0.76104	-2.79944	RAD23A	-824	RAD23A	TSS1500	RAD23A (-824)		15.2074	5.23337	11.8399	5.81792
	325	cg27269148	chr 13: 113735331	-0.0270671	0.000991212	0.617879	-3.29301	F7	-24773	MCF2L;MCF2L	Body;Body	F7 (-24773)	MCF2L (+111797)	3.72164	4.00118	1.10871	3.42379
	326	cg19241112	chr 12: 77244839	-0.029505	0.00317577	0.704642	-2.95019	CSRP2	27960	ZDHHC17	3'UTR	CSRP2 (+27959)	ZDHHC17 (+86986)	2.14545	4.63932	-0.372861	4.5092
	327	cg22498396	chr 6: 133036545	0.0266529	0.000678997	0.60936	3.39792	VNN1	-1351	VNN1	TSS1500	VNN1 (-1352)		3.94758	4.83856	5.08599	4.86816
	328	cg20371573	chr 13: 109780516	0.0358374	0.00581849	0.762074	2.75784	MYO16	242022	MYO16	Body	MYO16 (+532017)	IRS2 (+658397)	0.211327	6.79364	3.87613	5.5661
	329	cg05461140	chr 1: 54764633	0.0346556	0.00555548	0.76104	2.77293	MRPL37	98794	SSBP3;SSBP3;SSBP3	Body;Body;Body	MRPL37 (+98794)	SSBP3 (+107458)	6.68746	6.11041	9.26451	5.21971
	330	cg02493167	chr 5: 76935719	-0.030486	0.00393851	0.726509	-2.88305	OTP	-1197	OTP	TSS1500	OTP (-1198)		4.22509	4.85089	1.5762	4.59911
	331	cg03031839	chr 8: 103094119	0.0287549	0.00273545	0.695074	2.996	NCALD	42443	NCALD;NCALD;NCALD;NCALD;NCALD;NCALD;NCALD	5'UTR;5'UTR;5'UTR;5'UTR;5'UTR;5'UTR;5'UTR	NCALD (+42442)	GRHL2 (+589452)	0.479465	3.8483	2.88568	4.56543
	332	cg13069815	chr 12: 80049003	0.0271936	0.00121579	0.649585	3.23515	PAWR	35787	PAWR	Body	PAWR (+35786)	SYT1 (+609571)	6.48108	4.0413	8.86754	3.97883
	333	cg14517810	chr 17: 14584000	0.0294572	0.00321763	0.704642	2.94614	CDRT7	-350291			HS3ST3B1 (+379495)	PMP22 (+580092)	2.85185	4.27949	5.02949	4.49576
	334	cg04386563	chr 12: 130060028	-0.0414804	0.00640345	0.762346	-2.72637	TMEM132D	328184	TMEM132D	Body	TMEM132D (+328183)	GLT1D1 (+721948)	7.705	7.78935	4.14039	7.17614
	335	cg26813718	chr 10: 127396428	-0.0294202	0.0032005	0.704642	-2.94779	FLJ37035	11634			CTBP2 (-679976)	C10orf137 (-11655)	9.71077	4.54344	6.17132	4.53602
	336	cg05038268	chr 11: 66885281	0.0325477	0.00491955	0.75835	2.81225	KDM2A	-1458	KDM2A;KDM2A	TSS1500;TSS1500	KDM2A (-1458)		24.3548	5.12677	27.0365	4.72417
	337	cg22483742	chr 1: 228286482	-0.0297661	0.00350381	0.718206	-2.91969	MIR3620	1519	ARF1;ARF1;ARF1;ARF1	3'UTR;3'UTR;3'UTR;3'UTR	MRPL55 (+10530)	ARF1 (+16122)	10.9566	5.06779	7.73895	4.75045
	338	cg22079685	chr 18: 74175082	-0.0364325	0.00601113	0.762346	-2.74717	ZNF516	32064	ZNF516	TSS200	ZNF516 (+32063)		11.148	5.76827	7.2181	5.44993
	339	cg10249224	chr 1: 32828191	-0.0294043	0.00324026	0.704797	-2.94398	TSSK3	330	TSSK3;TSSK3;LOC100128071	1stExon;5'UTR;TSS1500	TSSK3 (+330)		8.99763	4.64538	4.96363	4.83103
	340	cg23738760	chr 12: 11918643	-0.0330268	0.00516582	0.76104	-2.79651	ETV6	-103714	ETV6	Body	BCL2L14 (-305234)	ETV6 (+115856)	19.2343	4.7712	16.7889	5.83478
	341	cg02816525	chr 15: 59024033	0.0278851	0.00204987	0.686846	3.08291	ADAM10	18144	ADAM10	Body	HSP90AB4P (-38710)	ADAM10 (+18143)	5.77137	4.22409	8.25031	4.01472
	342	cg16292851	chr 18: 29710780	0.0367679	0.00618615	0.762346	2.73775	RNF138	38212	RNF138;RNF138	3'UTR;3'UTR	MEP1B (-59206)	RNF138 (+38212)	4.57104	7.17079	8.40494	6.50274
	343	cg20124551	chr 11: 120439522	-0.042707	0.00654884	0.762346	-2.71896	GRIK4	4378			GRIK4 (-91455)	ARHGEF12 (+231905)	16.7578	7.996	12.8711	6.09571
	344	cg02925594	chr 16: 57572900	-0.0341922	0.00561587	0.762074	-2.76941	CCDC102A	-2423			GPR114 (-3700)		15.9791	4.58101	13.2608	6.7344
	345	cg15631458	chr 8: 20160009	0.0274047	0.00167438	0.676137	3.14263	5S_rRNA	12325			LZTS1 (-47207)		5.26622	3.90083	7.75919	3.22111
	346	cg17460713	chr 5: 178461226	-0.026067	0.000203196	0.465243	-3.71501	ZNF879	10451	ZNF879	3'UTR	ZNF354C (-26380)	ZNF879 (+10451)	1.58688	3.29235	-0.81511	3.08956
	347	cg19736009	chr 10: 73994187	-0.0314478	0.00452926	0.738708	-2.83874	ASCC1	-17295	C10orf104	3'UTR	DDIT4 (-39489)	ASCC1 (-18321)	6.00381	5.01665	2.64177	5.59779
	348	cg03603211	chr 11: 76859387	-0.0294418	0.00334713	0.707036	-2.93392	MYO7A	20078	MYO7A;MYO7A;MYO7A	Body;Body;Body	MYO7A (+20078)	GDPD4 (+139075)	4.92238	4.31389	2.70181	5.0798
	349	cg21351392	chr 6: 161607487	0.0368207	0.00628184	0.762346	2.7327	AGPAT4-IT1	-24473	AGPAT4	Body	AGPAT4 (+87619)	MAP3K4 (+194666)	1.6431	7.03727	4.95031	6.56605
	350	cg21184216	chr 5: 102598034	0.0306062	0.00422228	0.729944	2.86106	C5orf30	2910	C5orf30	5'UTR	PPIP5K2 (+133025)	NUDT12 (+300455)	0.030167	5.52492	2.85077	5.03125
	351	cg11089646	chr 4: 184831882	-0.0284069	0.00267234	0.695074	-3.00311	STOX2	5374	STOX2	Body	STOX2 (+5374)	ENPP6 (+307231)	11.353	4.74394	8.03805	4.50626
	352	cg26827533	chr 8: 22458122	-0.0284834	0.00273743	0.695074	-2.99578	C8orf58	1009	C8orf58	Body	KIAA1967 (-4416)		12.474	4.52396	8.70487	4.59521
	353	cg01620223	chr 12: 122108335	-0.0351475	0.00600155	0.762346	-2.7477	MORN3	-775	MORN3	TSS1500	TMEM120B (-42322)	ORAI1 (+43881)	13.3396	5.53689	9.23624	5.92454
	354	cg04227892	chr 5: 2169402	0.0284427	0.00276387	0.695074	2.99285	IRX4	-286522			IRX4 (-286523)	IRX2 (+582366)	-0.786522	3.7235	1.79278	3.99711
	355	cg10399402	chr 8: 26496661	-0.0293396	0.00357777	0.720253	-2.91317	DPYSL2	60741	DPYSL2	Body	DPYSL2 (+124953)	ADRA1A (+226260)	15.8665	4.76436	12.4744	3.85243
	356	cg11846580	chr 16: 88590409	0.0295926	0.00381709	0.726084	2.89289	C16orf85	42716	ZFPM1	Body	ZC3H18 (-46379)	ZFPM1 (+70396)	0.106863	4.98795	1.95425	4.6991
	357	cg05763609	chr 3: 100535443	-0.0256645	6.22652e-05	0.461884	-4.00406	ABI3BP	896	ABI3BP	Body	TFG (+107058)	ABI3BP (+176890)	1.8497	2.8177	-0.303293	2.97458
	358	cg19909036	chr 15: 90294776	0.0287099	0.00315765	0.704642	2.95196	MESP1	-236	MESP1	TSS1500	MESP1 (-237)		4.86042	4.08359	6.65144	5.22892
	359	cg04214305	chr 17: 19235050	0.027892	0.00243804	0.695074	3.03093	MIR1180	12837	EPN2;EPN2;EPN2	Body;Body;Body	B9D1 (+30995)	EPN2 (+94361)	11.0886	3.90375	13.4464	4.10619
	360	cg02528112	chr 7: 156754734	0.032146	0.00523898	0.76104	2.79196	NOM1	-110	NOM1	Body	NOM1 (+12318)	MNX1 (+48612)	8.72842	4.87036	11.8839	5.24503
	361	cg25918821	chr 17: 36811232	0.0264371	0.000988921	0.617879	3.29366	C17orf96	19955			MLLT6 (-50640)	SRCIN1 (-49050)	0.0278349	3.43634	2.71169	3.31385
	362	cg01878750	chr 7: 2776006	0.0266771	0.00123564	0.651878	3.23052	AMZ1	33897	GNA12	Body	AMZ1 (+56844)	GNA12 (+107952)	3.87753	3.74454	5.88044	3.76307
	363	cg08432509	chr 20: 62317768	-0.035702	0.00637154	0.762346	-2.72802	RTEL1-TNFRSF6B	-3334	RTEL1;RTEL1	Body;Body	TNFRSF6B (-9362)	RTEL1 (+28606)	4.23519	4.85691	1.41797	6.43414
	364	cg08719608	chr 5: 138727887	0.0293257	0.00369437	0.72595	2.90314	MZB1	-2282	LOC389333	1stExon	MZB1 (-2283)		3.92216	4.03126	7.19226	4.44839
	365	cg10082647	chr 12: 107348855	-0.0374103	0.00666227	0.762346	-2.71327	AK055712	420	C12orf23	TSS1500	C12orf23 (-688)		15.852	5.85381	10.8487	6.94624
	366	cg04694492	chr 16: 4387567	-0.0261603	0.000777148	0.617879	-3.36081	GLIS2	5352	GLIS2	3'UTR	VASN (-34281)	GLIS2 (+5352)	8.17839	3.28562	5.30504	3.58238
	367	cg09898548	chr 20: 56803078	-0.027466	0.00216429	0.695074	-3.06671	PPP4R1L	18230			PMEPA1 (-518048)	PPP4R1L (+81416)	9.17412	4.42548	6.4201	3.61692
	368	cg14871225	chr 5: 139040820	0.0287049	0.00329898	0.706845	2.93841	CXXC5	12303	CXXC5	5'UTR	PSD2 (-134585)	CXXC5 (+12520)	-0.0548816	4.6949	2.11745	3.89067
	369	cg16567202	chr 17: 19772177	-0.0289363	0.00352022	0.718651	-2.91823	ULK2	-938	ULK2;ULK2	TSS1500;TSS1500	ULK2 (-939)		17.6066	5.22821	14.6538	3.96505
	370	cg27274718	chr 3: 15772890	-0.0274902	0.00224073	0.695074	-3.05632	BC041363	-8836	ANKRD28	Body	ANKRD28 (+128162)	BTD (+129636)	20.3453	4.21329	17.2171	4.03278
	371	cg10219157	chr 4: 2395549	0.0288578	0.00347638	0.715914	2.92214	ZFYVE28	24821	ZFYVE28	Body	MXD4 (-131811)	ZFYVE28 (+24820)	4.81126	4.53374	7.43766	4.53516
	372	cg18123753	chr 17: 20905787	0.0343173	0.00623824	0.762346	2.73499	USP22	40565	USP22	3'UTR	USP22 (+40564)	CDRT15L2 (+422751)	5.55905	6.56512	7.65546	6.87478
	373	cg03515844	chr 1: 16277545	0.0270434	0.00183975	0.676137	3.11495	ZBTB17	25082	ZBTB17	5'UTR	ZBTB17 (+25081)	SPEN (+103187)	7.51515	3.78738	9.66474	4.51997
	374	cg05726661	chr 17: 7348438	0.0278979	0.00269817	0.695074	3.00018	CHRNB1	33	CHRNB1;CHRNB1	1stExon;5'UTR	CHRNB1 (+33)		8.002	5.22583	9.95941	3.95794
	375	cg13588403	chr 14: 73209128	-0.0296103	0.00416669	0.729778	-2.86526	DPF3	-18315	DPF3	Body	DPF3 (+151680)	RGS6 (+809973)	2.68901	4.4353	-0.97718	4.53767
	376	cg13215285	chr 1: 22237254	0.0350283	0.00649288	0.762346	2.72179	HSPG2	-14451	HSPG2	Body	HSPG2 (+26495)	LDLRAD2 (+98497)	3.18706	5.71644	5.5953	5.99797
	377	cg06592829	chr 3: 11519599	-0.0303468	0.00483267	0.753774	-2.81798	AX748267	-58123	ATG7;ATG7;ATG7	Body;Body;Body	VGLL4 (+165798)	ATG7 (+205590)	21.1643	4.60371	18.3729	4.75969
	378	cg21597025	chr 3: 142837564	-0.028304	0.00316232	0.704642	-2.9515	CHST2	-1053	CHST2	TSS1500	CHST2 (-1053)		19.8927	4.40075	16.6821	4.4238
	379	cg26666107	chr 1: 55505073	0.0290332	0.00381091	0.726084	2.8934	PCSK9	-75	PCSK9	TSS200	PCSK9 (-75)		3.44913	4.5565	5.99214	4.46287
	380	cg27658048	chr 7: 4201594	0.0258161	0.000524433	0.599465	3.46796	SDK1	32278	SDK1;SDK1	Body;Body	FOXK1 (-520335)	SDK1 (+860515)	-0.7733	3.23643	1.66498	3.33319
	381	cg00320597	chr 8: 1339461	-0.0255981	0.000293452	0.534774	-3.62101	LOC286083	-88634			C8orf42 (-844131)	DLGAP2 (-110107)	1.56786	4.55617	-0.737799	3.86027
	382	cg02082462	chr 19: 848001	0.0282871	0.00318654	0.704642	2.94915	ELANE	-4289	PRTN3	3'UTR	ELANE (-4289)		0.13841	4.03075	2.19184	4.39948
	383	cg17859578	chr 12: 112816053	0.0339244	0.00634243	0.762346	2.72953	C12orf51	3843			C12orf51 (+3842)	TRAFD1 (+252705)	13.0186	5.76981	15.2671	6.05429
	384	cg26873338	chr 12: 69637167	0.0264542	0.00147959	0.676137	3.17866	CPSF6	3851	CPSF6	Body	LYZ (-104966)	CPSF6 (+3851)	16.9742	3.87546	18.7117	4.28182
	385	cg26895804	chr 8: 145917243	-0.0285397	0.00355127	0.720253	-2.91549	ARHGAP39	-6049			ARHGAP39 (-78356)	ZNF251 (+63726)	4.7169	3.46387	2.05389	4.91442
	386	cg08325885	chr 8: 22297108	-0.025353	5.27975e-05	0.461884	-4.04289	PPP3CC	-1374	PPP3CC	TSS1500	PPP3CC (-1374)		5.98089	2.96943	3.03783	2.99299
	387	cg16314693	chr 5: 1813859	0.0257261	0.00057835	0.599465	3.44157	NDUFS6	12364	NDUFS6	Body	NDUFS6 (+12364)	IRX4 (+69020)	3.91572	3.01553	6.47591	3.33374
	388	cg24769158	chr 12: 123351868	0.0298694	0.00465357	0.743368	2.83008	HIP1R	11396	VPS37B	Body	VPS37B (+28843)	HIP1R (+31830)	8.35758	5.6735	10.1673	5.50073
	389	cg17253981	chr 4: 114366508	-0.0287484	0.00377583	0.726084	-2.89631	ANK2	72068			CAMK2D (+316574)	ANK2 (+395724)	15.6005	4.94229	11.9983	4.61763
	390	cg04344000	chr 6: 117869857	0.0266424	0.00175591	0.676137	3.12868	DCBLD1	9440	DCBLD1	Body	NUS1 (-126759)	DCBLD1 (+66038)	2.07671	3.75066	4.54335	4.59028
	391	cg12253071	chr 4: 19740944	-0.0337583	0.00642286	0.762346	-2.72537	SLIT2	-514290			SLIT2 (-514290)		4.0834	5.0443	1.61297	6.48244
	392	cg14750551	chr 3: 122401343	-0.0322101	0.0058546	0.762074	-2.75582	PARP14	1672	PARP14	Body	PARP14 (+1672)	HSPBAP1 (+111322)	17.4368	5.76816	14.26	4.54639
	393	cg17541142	chr 7: 1546826	0.0272566	0.0024074	0.695074	3.03474	INTS1	-2808			INTS1 (-2809)		8.71665	3.9114	10.7709	4.21504
	394	cg21477075	chr 6: 168433436	-0.0339898	0.00652509	0.762346	-2.72016	KIF25	14884	KIF25;KIF25	Body;Body	KIF25 (+14884)	FRMD1 (+46402)	13.3793	5.40638	9.6952	5.39956
	395	cg19117501	chr 11: 134206074	-0.029659	0.00460277	0.739733	-2.83359	GLB1L2	4307	GLB1L2	Body	GLB1L2 (+4307)	B3GAT1 (+75737)	8.39168	4.85166	5.73544	4.46729
	396	cg11464053	chr 11: 619080	-0.0302767	0.00515611	0.76104	-2.79712	IRF7	-3081	MUPCDH;MUPCDH	Body;Body	IRF7 (-3082)		2.27966	5.50007	-0.628429	4.58492
	397	cg06483698	chr 7: 6310290	0.0262582	0.00144251	0.676137	3.18601	CYTH3	1952	CYTH3	Body	CYTH3 (+1951)	USP42 (+165741)	14.1135	4.2133	16.0015	4.23497
	398	cg06915270	chr 1: 183891360	-0.0261569	0.00126211	0.655234	-3.22446	GLT25D2	24392	RGL1	Body	APOBEC4 (-268913)	GLT25D2 (+115502)	5.15997	3.66777	2.70297	3.53594
	399	cg26243751	chr 19: 11495794	-0.0344435	0.00674629	0.762346	-2.70912	EPOR	-776	EPOR	TSS1500	EPOR (-777)		2.02584	5.27709	-1.54995	5.43738
	400	cg09589951	chr 2: 236897639	0.0283137	0.00357473	0.720253	2.91344	AK000798	-18572	AGAP1;AGAP1	Body;Body	GBX2 (+179012)	AGAP1 (+494907)	6.68343	4.38596	8.44263	4.99458
	401	cg07291349	chr 4: 40964962	0.0347137	0.00680199	0.762346	2.70639	APBB2	-17872	APBB2;APBB2;APBB2	Body;Body;Body	NSUN7 (+213049)	APBB2 (+251672)	15.8626	5.8333	18.5463	5.42834
	402	cg01571283	chr 8: 1799227	0.0262673	0.00156226	0.676137	3.16286	ARHGEF10	-7589	ARHGEF10	Body	MYOM2 (-193930)	ARHGEF10 (+27079)	4.81505	3.65983	6.76909	4.47959
	403	cg12884551	chr 5: 1673208	0.0371065	0.00736522	0.762922	2.67986	MIR4277	35775			LPCAT1 (-149133)	MRPL36 (+126747)	-2.08084	5.05437	2.0854	6.75014
	404	cg15625693	chr 4: 187187177	0.0384119	0.00747241	0.762922	2.67502	F11	60	F11;F11	5'UTR;1stExon	F11 (+60)		-1.57723	6.9347	1.83738	7.41651
	405	cg24091982	chr 4: 141237092	-0.0327135	0.00634689	0.762346	-2.7293	SCOC	-27504	SCOC	5'UTR	MAML3 (-161860)	SCOC (-27504)	5.47479	5.4751	2.82219	5.74096
	406	cg03018496	chr 15: 96868989	0.0292495	0.0044597	0.738708	2.84367	NR2F2	-167	NR2F2	TSS200	NR2F2 (-5121)		-1.01249	5.47339	1.19247	4.95253
	407	cg01660827	chr 2: 97486072	-0.0265473	0.00196762	0.679627	-3.09508	CNNM3	4082	CNNM3;CNNM3	Body;Body	CNNM3 (+4082)	ANKRD23 (+23685)	8.23056	2.99959	5.27689	4.02101
	408	cg07612655	chr 20: 48185517	0.0260102	0.0013313	0.668275	3.20915	PTGIS	-810	PTGIS	TSS1500	PTGIS (-811)		4.88055	3.437	7.35394	3.70802
	409	cg13905238	chr 3: 197155273	0.0318961	0.00620024	0.762346	2.737	BDH1	127585			DLG1 (-129827)	BDH1 (+127584)	20.9884	4.85947	23.8261	6.29057
	410	cg14299931	chr 13: 111839335	-0.0335014	0.00678694	0.762346	-2.70712	ARHGEF7	163	ARHGEF7;ARHGEF7;ARHGEF7;ARHGEF7;ARHGEF7;ARHGEF7	Body;1stExon;5'UTR;5'UTR;Body;Body	C13orf16 (-133679)	ARHGEF7 (+71712)	4.12033	5.55692	0.217247	5.7069
	411	cg17206555	chr 7: 90227371	-0.0310011	0.00587113	0.762074	-2.75489	CDK14	1652			CDK14 (-111340)	CLDN12 (+194724)	6.95654	5.0961	3.28309	5.53204
	412	cg21167587	chr 9: 36397390	0.0434503	0.00804059	0.769548	2.65036	RNF38	2906	RNF38;RNF38;RNF38;RNF38;RNF38	5'UTR;5'UTR;Body;5'UTR;Body	GNE (-120338)	RNF38 (+2905)	7.1141	7.26221	11.8577	7.03286
	413	cg22251117	chr 17: 182954	-0.0333489	0.0067642	0.762346	-2.70824	LOC100506388	1959	RPH3AL	5'UTR	DOC2B (-151535)	RPH3AL (+19678)	5.81365	6.76862	1.33301	6.35954
	414	cg27572072	chr 7: 958244	0.0257918	0.00118201	0.649585	3.24319	ADAP1	2269	ADAP1	Body	ADAP1 (+36061)	GET4 (+42054)	7.204	3.40514	9.65157	3.38219
	415	cg07904567	chr 12: 133346306	-0.0258852	0.00135792	0.668275	-3.20345	ANKLE2	-7855	GOLGA3	3'UTR	ANKLE2 (-7856)	GOLGA3 (+58981)	1.45361	4.31083	-0.821825	4.5019
	416	cg03172212	chr 5: 175873937	-0.0340357	0.00708962	0.762922	-2.69261	FAF2	-1418	FAF2	TSS1500	FAF2 (-1418)		7.22432	5.35887	3.40741	5.44076
	417	cg02106279	chr 6: 75960530	0.0263514	0.00207058	0.689223	3.07992	COX7A2	-6886			COX7A2 (-6887)	TMEM30A (+34101)	0.491884	4.09375	3.30475	3.99389
	418	cg26418147	chr 1: 205743515	0.0262714	0.00198058	0.679627	3.09313	RAB7L1	1095	RAB7L1;RAB7L1;RAB7L1;RAB7L1	Body;Body;Body;5'UTR	NUCKS1 (-24144)	RAB7L1 (+1094)	7.20811	3.86224	9.3452	3.87258
	419	cg22033936	chr 7: 155996484	-0.0269796	0.00274435	0.695074	-2.99501	LOC285889	241798			SHH (-391518)	C7orf13 (+436863)	5.32002	3.68551	2.34924	3.85664
	420	cg04991747	chr 1: 230207211	-0.0326077	0.00675902	0.762346	-2.70849	GALNT2	4256	GALNT2	Body	GALNT2 (+4256)	PGBD5 (+306179)	9.49637	4.68575	5.89289	5.47639
	421	cg13919506	chr 9: 131535850	-0.0340961	0.00720928	0.762922	-2.68702	ZER1	-1652			ZER1 (-1653)		12.7066	5.5386	8.57757	6.127
	422	cg27514777	chr 16: 14377664	0.0271066	0.00282558	0.695074	2.9861	TRNA_Thr	-2085			MKL2 (+212469)	PARN (+346463)	2.05536	4.12355	4.41298	4.33589
	423	cg09845093	chr 1: 56424393	0.0248709	5.68243e-05	0.461884	4.02562	AK127270	377684			AK127270 (+377684)	PPAP2B (+620863)	14.9797	2.51645	17.5827	3.02382
	424	cg02758247	chr 18: 59222050	-0.0258386	0.00147576	0.676137	-3.17941	CDH20	64416	CDH20	3'UTR	CDH20 (+64416)	RNF152 (+338253)	2.19143	3.93771	-0.31224	2.837
	425	cg22217533	chr 4: 1065613	0.0366202	0.00783939	0.766527	2.65891	AK124578	-8869	RNF212;RNF212	3'UTR;3'UTR	RNF212 (+41738)	FGFRL1 (+59854)	1.44688	6.06827	5.04744	6.04752
	426	cg12595306	chr 15: 67236361	-0.0249915	0.000201109	0.465243	-3.71762	Mir_1302	-43687			SMAD3 (-121833)	SMAD6 (+241688)	1.25913	3.46925	-0.888479	3.00078
	427	cg08952844	chr 2: 88313351	0.030335	0.0058951	0.762346	2.75356	KRCC1	14731			RGPD2 (-188066)	SMYD1 (-53947)	17.7058	4.46447	19.9506	4.88926
	428	cg13467459	chr 1: 180919564	-0.0263097	0.00218391	0.695074	-3.06401	KIAA1614	21999			STX6 (+72481)	XPR1 (+318419)	6.07012	3.75588	3.60245	3.7498
	429	cg09545579	chr 17: 79377548	0.0507085	0.00857701	0.777965	2.62847	MIR4740	-2970	BAHCC1	Body	BAHCC1 (+4009)	ACTG1 (+102343)	16.7272	8.89522	21.59	8.76088
	430	cg15555463	chr 1: 201851880	-0.0293719	0.0052693	0.76104	-2.79009	SHISA4	-5916	IPO9	3'UTR	SHISA4 (-5924)	IPO9 (+53593)	20.4185	3.6896	17.1483	5.20485
	431	cg09429180	chr 10: 124128755	0.0284734	0.0044664	0.738708	2.84319	PLEKHA1	-5338			PLEKHA1 (-5338)	TACC2 (+380067)	7.35113	5.02771	9.58425	4.62038
	432	cg11315991	chr 7: 601283	-0.0279712	0.00399647	0.726509	-2.87844	PRKAR1B	39938	PRKAR1B;PRKAR1B;PRKAR1B;PRKAR1B;PRKAR1B;PRKAR1B	Body;Body;Body;Body;Body;Body	HEATR2 (-165054)	PDGFA (-41803)	3.12105	4.30967	0.339854	4.56664
	433	cg01815801	chr 13: 114270609	-0.0280441	0.00407858	0.726995	-2.87202	TFDP1	30521	TFDP1;TFDP1	Body;Body	TFDP1 (+31554)	ATP4B (+41903)	13.9244	4.40232	11.0111	4.50798
	434	cg03090982	chr 22: 47424215	-0.0276128	0.00360571	0.720253	-2.91074	FLJ32756	-112299	TBC1D22A	Body	TBC1D22A (+265698)		2.41869	3.81876	-0.164579	4.60697
	435	cg09825670	chr 1: 1611999	0.0254594	0.00100787	0.617879	3.28832	SLC35E2	-3714	CDK11B;CDK11B;CDK11B;CDK11B;CDK11B;LOC728661;CDK11B	Body;Body;Body;Body;Body;5'UTR;5'UTR	SLC35E2B (+12243)	MMP23B (+44440)	6.2637	4.71149	8.68492	3.33675
	436	cg12222277	chr 1: 2191658	0.0281174	0.00418525	0.729778	2.86385	SKI	31525	SKI	Body	RER1 (-131555)	SKI (+31525)	13.9135	4.67859	15.7803	4.97117
	437	cg21179912	chr 9: 2024387	-0.031702	0.00659675	0.762346	-2.71654	SMARCA2	9046	SMARCA2;SMARCA2	5'UTR;5'UTR	VLDLR (-597405)	SMARCA2 (+9046)	15.8443	5.57887	12.2041	4.99713
	438	cg01919401	chr 7: 130985828	-0.030231	0.00597722	0.762346	-2.74903	AK054623	26707	MKLN1	Body	KLF14 (-566941)	MKLN1 (-26766)	15.1517	4.28698	11.9681	5.54674
	439	cg21243612	chr 9: 111700548	0.0286845	0.00479576	0.749982	2.82044	FAM206A	3876	C9orf6	Body	IKBKAP (-3941)	FAM206A (+3876)	0.12151	4.43976	2.52282	4.82334
	440	cg03766872	chr 11: 67209552	-0.0291739	0.00524695	0.76104	-2.79147	CORO1B	1431	CORO1B;CORO1B	Body;Body	PTPRCAP (-4400)		16.1758	4.98009	13.2844	4.51349
	441	cg16679386	chr 20: 3732213	-0.0268879	0.00281773	0.695074	-2.98695	C20orf27	16239	HSPA12B	Body	HSPA12B (+18897)	SPEF1 (+29888)	1.97717	4.09836	-0.84359	3.77624
	442	cg16516980	chr 11: 1535048	-0.0247718	7.41537e-05	0.461884	-3.96255	MOB2	-27100	HCCA2	Body	MOB2 (-27101)	DUSP8 (+58101)	5.38315	2.98738	3.25972	2.5126
	443	cg06181761	chr 14: 92042045	-0.0343012	0.0075021	0.762922	-2.67369	C14orf184	-1089	C14orf184	TSS1500	SMEK1 (-65402)	CATSPERB (+156367)	2.76252	5.94451	0.0889369	5.98648
	444	cg20016673	chr 1: 108023366	0.0321077	0.00678592	0.762346	2.70717	NTNG1	85591	NTNG1;NTNG1;NTNG1	Body;Body;Body	NTNG1 (+340738)	VAV3 (+484178)	-1.33074	5.00269	1.44699	5.14189
	445	cg08368169	chr 13: 25949998	0.0332551	0.00723653	0.762922	2.68576	ATP8A2	3790	ATP8A2	Body	ATP8A2 (+3790)	SHISA2 (+675199)	9.92956	4.7639	12.7742	5.48794
	446	cg18125573	chr 17: 38506350	0.0299401	0.00585152	0.762074	2.75599	RARA	8080	RARA;RARA;RARA;RARA	Body;Body;Body;Body	GJD3 (+14594)	RARA (+40928)	8.51629	4.69835	11.0238	5.16804
	447	cg16864975	chr 3: 12043404	-0.0332556	0.00726404	0.762922	-2.68449	SYN2	-2457			SYN2 (-2457)		2.95097	5.30321	0.0872729	5.48957
	448	cg12448298	chr 2: 115822039	0.0270242	0.00312943	0.704642	2.95473	DPP10	-207	DPP10	Body	DPP10 (-97473)		0.318451	4.37602	2.53717	3.5082
	449	cg26887212	chr 6: 33286244	-0.0266755	0.00278751	0.695074	-2.99025	ZBTB22	-525	ZBTB22;ZBTB22	TSS1500;TSS1500	TAPBP (-4081)	ZBTB22 (-526)	11.9753	3.69054	8.86907	4.34081
	450	cg04883026	chr 11: 66487938	0.0281094	0.00433627	0.733186	2.8526	SPTBN2	932	SPTBN2	Body	SPTBN2 (+931)		-0.966258	4.39825	1.41711	3.91023
	451	cg03076130	chr 19: 1397305	-0.0315416	0.00668662	0.762346	-2.71206	AK126693	-839	GAMT	3'UTR	GAMT (+4246)	NDUFS7 (+13599)	5.88974	5.72788	3.00838	4.80964
	452	cg22571544	chr 5: 32014638	0.0301287	0.00608202	0.762346	2.74333	MIR4279	-78373	PDZD2	Body	GOLPH3 (+159786)	PDZD2 (+215643)	10.1965	4.57355	12.8326	4.6427
	453	cg25979244	chr 1: 231991715	0.025488	0.00129344	0.659486	3.21743	DISC2	-37452	DISC1;DISC1;DISC1;DISC1;DISC1;DISC1;TSNAX-DISC1;DISC1;DISC1;DISC1;DISC1	Body;Body;Body;Body;Body;Body;Body;Body;Body;Body;Body	DISC1 (+229155)	SIPA1L2 (+659527)	2.64298	3.60635	4.46817	3.94824
	454	cg25955565	chr 14: 71863756	0.0341337	0.00759269	0.764375	2.66967	SNORD56B	-1297	SNORD56B	TSS1500	SIPA1L1 (-132272)	PCNX (+489635)	12.9693	6.73665	16.1457	5.77085
	455	cg06351144	chr 13: 113139584	0.0288454	0.00515898	0.76104	2.79694	TUBGCP3	102897	TUBGCP3	3'UTR	TUBGCP3 (+102896)	SPACA7 (+108934)	0.662098	4.88066	3.61136	4.32025
	456	cg16212754	chr 14: 56777251	0.0330124	0.00723839	0.762922	2.68567	PELI2	192159			C14orf101 (-269259)	PELI2 (+192159)	0.939068	5.55631	4.00565	4.76734
	457	cg05168368	chr 6: 14209372	-0.0282646	0.00454672	0.73953	-2.83751	CD83	91508			CD83 (+91508)		11.4261	4.45556	8.42377	4.08923
	458	cg24873410	chr 6: 166836643	0.0293296	0.00551763	0.76104	2.77515	RPS6KA2	821	RPS6KA2;RPS6KA2	Body;Body	BRP44L (-40158)	RPS6KA2 (+439127)	1.11214	3.91225	3.67064	5.28701
	459	cg14972271	chr 1: 223899736	-0.0360039	0.00820669	0.773095	-2.64345	CAPN2	-382	CAPN2;CAPN2	TSS1500;Body	CAPN2 (-382)		9.39819	7.41389	4.85855	5.42986
	460	cg13779963	chr 6: 17903072	0.027717	0.00403514	0.726995	2.8754	KIF13A	-65751	KIF13A;KIF13A;KIF13A;KIF13A	Body;Body;Body;Body	NUP153 (-196255)	KIF13A (+84781)	11.6549	3.38236	13.203	5.80142
	461	cg12547218	chr 2: 240153820	-0.0269422	0.00318885	0.704642	-2.94892	MGC16025	-36667	HDAC4	Body	HDAC4 (+168822)	TWIST2 (+397148)	7.10675	4.0767	4.69375	3.57516
	462	cg27418402	chr 3: 64008161	0.025557	0.00158051	0.676137	3.15948	PSMD6	952	PSMD6	Body	PSMD6 (+958)		4.71872	4.03087	6.53006	3.73811
	463	cg13470557	chr 20: 61431876	0.0254561	0.00139948	0.668275	3.19476	C20orf20	4072	C20orf20	3'UTR	OGFR (-4300)		1.50242	4.17749	3.74341	4.8331
	464	cg03730703	chr 1: 160173841	0.0251387	0.000899039	0.617879	3.32035	PEA15	-1283	PEA15	TSS1500	PEA15 (-1283)		13.9201	2.7698	16.1786	3.46756
	465	cg16674484	chr 5: 149887497	-0.0259853	0.0022738	0.695074	-3.05192	NDST1	-176	NDST1	TSS200	NDST1 (-176)		24.6501	3.68316	21.6375	3.66123
	466	cg14437092	chr 14: 66970921	0.0394929	0.00897565	0.789172	2.61298	GPHN	-3203			GPHN (-3203)		3.73051	6.67378	7.78617	6.80175
	467	cg21096050	chr 4: 85502665	-0.0255536	0.0016968	0.676137	-3.13873	CDS1	-1391	CDS1	TSS1500	CDS1 (-1391)		10.8539	3.52874	7.77331	3.88183
	468	cg12351906	chr 2: 1695316	-0.0316598	0.00706431	0.762922	-2.6938	PXDN	52975	PXDN	Body	PXDN (+52974)	TPO (+278084)	1.70276	5.65847	-0.953892	4.71689
	469	cg13571224	chr 4: 157881791	-0.0262972	0.00276132	0.695074	-2.99313	PDGFC	10755	PDGFC	Body	PDGFC (+10754)		8.50107	4.05475	5.90603	4.42628
	470	cg00933443	chr 3: 137892432	0.0283157	0.00504102	0.76104	2.8044	DBR1	1295	DBR1	Body	A4GNT (-41204)	DBR1 (+1358)	20.0704	4.28916	22.3001	4.83968
	471	cg23316191	chr 6: 106041074	0.0246744	0.000275789	0.513057	3.63704	PREP	-190075			PRDM1 (-493120)	PREP (-190076)	7.0018	2.77839	9.62486	3.2154
	472	cg09977361	chr 11: 120008836	0.0392027	0.00907811	0.791945	2.6091	TRIM29	27	TRIM29;TRIM29	1stExon;5'UTR	TRIM29 (+26)		0.274969	6.43077	3.40102	6.66123
	473	cg13011453	chr 18: 31807966	0.0255687	0.00180826	0.676137	3.12004	NOL4	-4451			NOL4 (-4452)		13.8576	4.3479	16.2265	3.26268
	474	cg16697896	chr 3: 71050832	0.0324266	0.00741314	0.762922	2.67769	FOXP1	39851	FOXP1	Body	FOXP1 (+243483)		13.2009	5.01845	15.5738	5.52758
	475	cg09026253	chr 11: 313267	-0.0270031	0.00359847	0.720253	-2.91137	IFITM1	-723	IFITM1	TSS1500	IFITM1 (-723)		7.18834	3.27914	4.93665	4.33374
	476	cg05329317	chr 16: 30126595	-0.0246044	0.000228442	0.480574	-3.68529	NR_027081	1163	MAPK3;MAPK3;MAPK3	3'UTR;3'UTR;3'UTR	GDPD3 (-1718)		10.5351	3.98068	8.20012	2.97151
	477	cg05136650	chr 20: 44523309	-0.0324982	0.00747714	0.762922	-2.67481	NEURL2	-3408	CTSA;CTSA;CTSA	Body;Body;Body	NEURL2 (-3409)		5.15187	5.16461	1.82014	4.98739
	478	cg05447100	chr 6: 168188992	0.0257137	0.00204402	0.686846	3.08376	C6orf123	8547	C6orf123	Body	TCP10 (-390995)	MLLT4 (-38678)	0.165999	3.92041	1.98056	3.91
	479	cg11484353	chr 20: 39958249	0.0284915	0.00532651	0.76104	2.78659	LPIN3	-11310			ZHX3 (-29511)	LPIN3 (-11310)	9.23721	5.31015	11.3237	4.71119
	480	cg25353142	chr 20: 43729869	0.0261449	0.00268526	0.695074	3.00164	KCNS1	-116	KCNS1	TSS200	KCNS1 (-117)		3.16777	3.94133	5.17453	3.75474
	481	cg00395486	chr 6: 143997701	-0.0292599	0.00596969	0.762346	-2.74944	PHACTR2	-1400	PHACTR2;PHACTR2;PHACTR2;PHACTR2	TSS1500;Body;Body;TSS1500	PHACTR2 (-1400)		9.92974	5.14424	7.25608	4.85094
	482	cg11366683	chr 5: 142189566	-0.0278312	0.00470499	0.744434	-2.82657	ARHGAP26	39275	ARHGAP26;ARHGAP26	Body;Body	ARHGAP26 (+39275)	NR3C1 (+594478)	17.8864	3.97735	15.2059	4.44662
	483	cg08230910	chr 7: 80507149	0.0272116	0.00396428	0.726509	2.88099	SEMA3C	41518	SEMA3C	Body	SEMA3C (+41517)	CD36 (+231505)	-0.814087	4.34436	2.58236	4.75094
	484	cg19770671	chr 2: 145753993	0.0296959	0.00637388	0.762346	2.7279	BC040861	-26388			ZEB2 (-476036)		12.7199	5.4921	15.9942	5.64424
	485	cg06551168	chr 19: 308524	-0.0261589	0.00279673	0.695074	-2.98924	PPAP2C	-17089	MIER2	Body	PPAP2C (-17356)	MIER2 (+36266)	7.414	4.14542	5.15469	4.05205
	486	cg17658244	chr 20: 21170099	-0.025334	0.00160822	0.676137	-3.15441	PLK1S1	27588	PLK1S1;PLK1S1;PLK1S1	Body;Body;Body	XRN2 (-113842)	PLK1S1 (+63476)	6.08513	4.93056	3.53681	3.95329
	487	cg13159929	chr 17: 7493222	-0.0245964	0.000377717	0.562141	-3.55518	SOX15	168	SOX15;SOX15	1stExon;5'UTR	SOX15 (+265)		28.7488	2.9058	25.8334	3.7191
	488	cg19764973	chr 11: 59525433	0.0252724	0.00151404	0.676137	3.17198	STX3	2902	STX3	Body	STX3 (+2902)	MRPL16 (+52911)	8.60938	3.62756	10.6303	3.19924
	489	cg02071305	chr 15: 41185973	-0.0278749	0.00492052	0.75835	-2.81219	VPS18	-654	VPS18	TSS1500	VPS18 (-654)		4.49947	4.28968	0.620482	4.89035
	490	cg08231343	chr 16: 4305580	0.0261453	0.00282105	0.695074	2.98659	LOC100507501	-1790			SRL (-13500)	TFAP4 (+17420)	21.5885	4.46421	23.0757	4.48632
	491	cg06092869	chr 1: 225642746	0.0242697	4.22702e-07	0.0754907	5.05844	LBR	-26189			LBR (-26932)	ENAH (+198098)	1.28179	2.51619	3.93115	2.36929
	492	cg12088946	chr 11: 5645913	-0.0305607	0.00699628	0.762922	-2.69702	TRIM34	-293	TRIM6-TRIM34;TRIM34;TRIM34;TRIM34	Body;TSS1500;TSS1500;5'UTR	TRIM6-TRIM34 (+28049)	TRIM5 (+60425)	12.2606	4.84122	9.62137	4.96787
	493	cg17045635	chr 10: 80998130	-0.0343091	0.00844444	0.776508	-2.63376	ZMIZ1	-5294	ZMIZ1	Body	PPIF (-109089)	ZMIZ1 (+169339)	13.4453	6.28663	9.21419	5.14191
	494	cg02543993	chr 7: 5736195	0.0293502	0.00624015	0.762346	2.73489	RNF216	-5286	RNF216;RNF216	Body;Body	RNF216 (+85165)	FSCN1 (+103760)	19.8837	4.99782	21.95	4.84932
	495	cg22215489	chr 11: 66402027	-0.0385205	0.00950276	0.798566	-2.59342	RBM4	-4060			RBM14 (+17975)	RBM4B (+43247)	20.1924	6.11927	16.1656	6.42042
	496	cg06609496	chr 5: 1174426	0.0253694	0.00181896	0.676137	3.1183	BC032469	4294			SLC12A7 (-62255)	SLC6A19 (-27283)	10.0858	3.88311	12.939	3.31313
	497	cg16707954	chr 14: 57365847	-0.0275733	0.00458224	0.739733	-2.83502	OTX2OS1	85947	OTX2OS1	Body	MUDENG (-369758)	OTX2 (-88664)	4.02617	3.98759	1.20725	4.19483
	498	cg12626076	chr 15: 92399195	0.0253515	0.00184545	0.676137	3.11404	SLCO3A1	1631	SLCO3A1;SLCO3A1	Body;Body	ST8SIA2 (-537944)	SLCO3A1 (+2258)	4.07275	3.75739	6.13635	3.43529
	499	cg21384854	chr 7: 47479252	-0.0243175	0.000147537	0.461884	-3.79518	TNS3	-70034	TNS3	5'UTR	TNS3 (+142489)		6.30321	3.38194	4.33632	2.80065
	500	cg09579932	chr 17: 3499165	-0.0258261	0.00255678	0.695074	-3.01654	TRPV1	-40	TRPV1;TRPV1;TRPV1	5'UTR;5'UTR;TSS200	TRPV3 (-37877)	TRPV1 (+1170)	15.0727	4.42494	12.9877	4.01148
	501	cg13717434	chr 9: 97854044	0.0295173	0.00651482	0.762346	2.72068	MIR3074	-5668			FANCC (+225946)	C9orf3 (+332114)	9.72821	4.44503	12.7127	4.53624
	502	cg05481881	chr 3: 150621326	-0.0306325	0.00723313	0.762922	-2.68592	CLRN1	38222			SIAH2 (-140064)	CLRN1 (+69459)	1.86613	5.0934	-1.22706	5.10364
	503	cg09668639	chr 2: 232376680	0.0250809	0.00146989	0.676137	3.18056	LINC00471	2370	C2orf52	Body	NCL (-47476)	NMUR1 (+18501)	3.55594	3.5839	5.54705	3.67202
	504	cg13372811	chr 1: 110627590	0.030076	0.00690666	0.762922	2.70131	ALX3	-14268			UBL4B (-27471)	ALX3 (-14269)	7.59625	5.03863	10.3293	5.0341
	505	cg05306183	chr 8: 11144705	0.0373574	0.00955455	0.79858	2.59155	MTMR9	2051	MTMR9	Body	SLC35G5 (-43789)	MTMR9 (+2706)	10.9121	6.58717	13.4845	6.33337
	506	cg15021031	chr 5: 146333034	0.0312734	0.0074951	0.762922	2.67401	PPP2R2B	-74577	PPP2R2B;PPP2R2B;PPP2R2B;PPP2R2B	5'UTR;Body;5'UTR;Body	GPR151 (-437359)	PPP2R2B (+102665)	7.64523	5.65735	10.4973	4.65514
	507	cg12726994	chr 2: 235406902	-0.025432	0.00206073	0.687903	-3.08134	ARL4C	-1209	ARL4C	TSS1500	ARL4C (-1210)		4.7854	4.34798	2.59102	3.63438
	508	cg23975973	chr 7: 95546556	-0.0378704	0.00964197	0.799239	-2.58841	DYNC1I1	112961	DYNC1I1;DYNC1I1;DYNC1I1	Body;Body;Body	DYNC1I1 (+144739)	SLC25A13 (+404902)	2.42836	6.78127	-1.27332	6.18727
	509	cg24757160	chr 11: 67804112	0.0253508	0.00192766	0.676137	3.10116	TCIRG1	-2349	NDUFS8	3'UTR	TCIRG1 (-2349)		8.81339	3.50982	11.4572	3.26084
	510	cg11945507	chr 8: 142233382	-0.0334041	0.008487	0.77753	-2.63206	SLC45A4	5291	SLC45A4	Body	PTK2 (-221971)	SLC45A4 (+5290)	2.70455	6.2773	-0.783492	5.11527
	511	cg01802953	chr 1: 173887360	0.0263111	0.0034169	0.712444	2.92751	SERPINC1	-844	SERPINC1	TSS1500	SERPINC1 (-845)		7.39091	3.95327	9.73455	3.88323
	512	cg00047147	chr 6: 32922346	-0.032688	0.00819547	0.773095	-2.64391	HLA-DMA	-1447	HLA-DMA	TSS1500	HLA-DMA (-1448)		3.41121	5.6583	0.805572	5.94597
	513	cg03264550	chr 20: 57465448	0.0252554	0.00185725	0.676137	3.11216	GNAS	-977	GNAS;GNAS;GNAS;GNAS;GNAS;GNAS;GNAS;GNAS	3'UTR;TSS1500;TSS1500;Body;TSS1500;3'UTR;TSS1500;Body	TH1L (-90862)	GNAS (+37413)	12.8562	4.32291	14.0751	4.49675
	514	cg21593211	chr 5: 99979316	0.0273306	0.00461199	0.739886	2.83296	FAM174A	108193			FAM174A (+108193)	ST8SIA4 (+259670)	-0.420472	4.15027	2.10872	4.99007
	515	cg05521261	chr 10: 6208594	0.0244169	0.000487094	0.591773	3.48775	MIR3155B	-14369	PFKFB3	Body	PFKFB3 (-36245)	RBM17 (+77646)	3.42009	3.20874	5.72198	3.17578
	516	cg20535299	chr 2: 97137216	-0.0245134	0.000664885	0.60936	-3.40366	NEURL3	33878			NEURL3 (+33877)	NCAPH (+135733)	2.16692	3.67139	-0.218934	2.77967
	517	cg16699540	chr 3: 156793711	-0.0314137	0.00772284	0.765889	-2.66395	LOC100498859	-13958			CCNL1 (+84770)	TIPARP (+399259)	4.9369	5.20888	2.01627	6.08693
	518	cg00676711	chr 8: 21268342	0.0252219	0.00186841	0.676137	3.11039	AK057515	112593			GFRA2 (+378003)		5.86246	4.36099	8.60571	3.59373
	519	cg24364491	chr 6: 32806906	0.0321364	0.00801001	0.769548	2.65165	TAP2	-359	TAP2;TAP2	TSS1500;TSS1500	TAP2 (-360)		21.8475	5.344	24.4029	5.01344
	520	cg16465643	chr 6: 159552440	0.0242544	0.000265873	0.505133	3.64646	FNDC1	-37988			TAGAP (-86257)	FNDC1 (-37988)	5.32626	2.95912	7.47839	3.06654
	521	cg20087776	chr 14: 31161422	-0.0292938	0.00661484	0.762346	-2.71564	SCFD1	69885	SCFD1;SCFD1	Body;Body	COCH (-182318)	SCFD1 (+69902)	2.67615	6.08826	1.02032	6.04026
	522	cg21486834	chr 17: 74477542	0.0247311	0.00109357	0.628938	3.26528	RHBDF2	85	RHBDF2;RHBDF2	Body;Body	RHBDF2 (+6448)	AANAT (+13913)	19.638	4.08645	21.8081	4.06876
	523	cg12523424	chr 7: 2184809	0.0290869	0.00649691	0.762346	2.72159	MAD1L1	70835	MAD1L1;MAD1L1;MAD1L1	Body;Body;Body	MAD1L1 (+87773)	ELFN1 (+436012)	2.41914	4.17752	4.56182	5.24145
	524	cg02764438	chr 15: 57671034	-0.0291787	0.00660012	0.762346	-2.71637	BC015433	1691	CGNL1	5'UTR	GCOM1 (-213067)	CGNL1 (+2332)	6.78788	4.87876	4.57475	5.16514
	525	cg14542554	chr 14: 61122327	-0.0364528	0.00971744	0.801343	-2.58573	SIX1	-6172			SIX1 (-6173)	SIX4 (+68524)	2.14829	6.49831	-0.111969	7.42903
	526	cg00420742	chr 19: 54313004	-0.0251339	0.00186853	0.676137	-3.11037	NLRP12	-1045	NLRP12;NLRP12	Body;TSS1500	NLRP12 (+14643)	DPRX (+177695)	1.38835	3.67457	-0.398006	4.12634
	527	cg17917241	chr 3: 181404883	0.0302226	0.00736566	0.762922	2.67984	JA611300	-8753	SOX2OT	Body	DNAJC19 (-697322)	SOX2 (-24828)	5.62805	6.6687	7.95029	6.24233
	528	cg26315457	chr 2: 48759821	-0.0325753	0.00846378	0.776838	-2.63299	STON1	2514			STON1-GTF2A1L (-47904)	FOXN2 (+218027)	10.3419	4.84039	7.56033	5.62977
	529	cg08767627	chr 4: 164252263	0.0264511	0.00392368	0.726509	2.88423	NPY1R	1684	NPY1R	5'UTR	NAF1 (-164191)	NPY1R (+1683)	11.0158	4.72663	12.922	4.18346
	530	cg14363242	chr 7: 81601173	0.0324045	0.0084385	0.776425	2.634	CACNA2D1	-768	CACNA2D1	Body	HGF (-201722)	CACNA2D1 (+471857)	3.83781	5.81465	7.15238	6.2009
	531	cg25509697	chr 3: 138666732	-0.0287535	0.00641763	0.762346	-2.72564	AK304483	279	FOXL2;C3orf72	TSS1500;Body	FOXL2 (-751)		3.15653	4.60263	0.359872	4.72269
	532	cg21230450	chr 14: 22320326	-0.0367642	0.00999112	0.805593	-2.57614	AV1S4A1N1T	-209			TCRA (-126400)	TCRA (+26664)	9.43009	6.49291	6.33946	5.67757
	533	cg07966572	chr 7: 149158486	-0.0277641	0.00547801	0.76104	-2.77749	ZNF777	-433	ZNF777	TSS1500	ZNF777 (-434)		9.98718	4.57315	7.05991	4.48449
	534	cg04551282	chr 16: 88884836	-0.0273581	0.00509318	0.76104	-2.80108	APRT	-6494	GALNS	Body	APRT (-6495)	GALNS (+38537)	3.88226	4.47262	1.26083	3.83317
	535	cg04979384	chr 19: 11319718	0.0264939	0.004051	0.726995	2.87416	DOCK6	61	DOCK6	Body	SPC24 (-53235)	C19orf80 (-30576)	4.68158	4.09989	6.93862	4.2097
	536	cg07547746	chr 6: 127584789	0.0243335	0.000663455	0.60936	3.40425	RNF146	-3037			RNF146 (-3037)		5.42818	3.81511	8.08208	3.62711
	537	cg21830368	chr 17: 75373327	0.029369	0.00694339	0.762922	2.69955	41161	1163	SEPT9;SEPT9;SEPT9;SEPT9;SEPT9	5'UTR;5'UTR;Body;Body;Body	TNRC6C (-626990)	SEPT9 (+95836)	2.69117	5.92778	5.11785	4.99458
	538	cg10973762	chr 15: 48625931	-0.0290771	0.00675641	0.762346	-2.70862	DUT	1567	DUT;DUT;DUT	Body;Body;Body	DUT (+2311)	FBN1 (+312053)	16.1573	4.24865	13.4253	5.02103
	539	cg23198906	chr 5: 9337872	-0.0279018	0.00576579	0.762074	-2.76081	SEMA5A	208361	SEMA5A	Body	SEMA5A (+208360)		5.52246	4.22036	2.85275	4.22714
	540	cg20426361	chr 2: 6072139	-0.0318968	0.00836969	0.776401	-2.63678	LOC150622	-679	LOC150622	TSS1500	SOX11 (+239341)	CMPK2 (+933796)	10.0543	5.14656	5.83634	6.31276
	541	cg25019898	chr 10: 1118816	0.0284847	0.00634559	0.762346	2.72937	WDR37	-1027	WDR37	Body	IDI1 (-23756)	ADARB2 (+660853)	3.06896	5.14251	5.99712	4.03623
	542	cg17827208	chr 15: 99470414	0.0245098	0.000980821	0.617879	3.29597	IGF1R	2661	IGF1R	Body	PGPEP1L (+78470)	IGF1R (+277654)	13.1277	3.18174	15.0094	3.40429
	543	cg26810157	chr 15: 57579076	-0.0313014	0.0081408	0.772699	-2.64617	LOC283663	-13486	TCF12;TCF12;TCF12;TCF12;TCF12	3'UTR;3'UTR;3'UTR;3'UTR;3'UTR	CGNL1 (-89626)	TCF12 (+368244)	14.7054	4.75867	10.8624	5.69407
	544	cg03198733	chr 12: 7167584	0.0272481	0.00507799	0.76104	2.80204	C1S	-395	C1S;C1S	TSS1500;TSS1500	C1S (-395)		2.57795	4.44349	5.25204	4.09103
	545	cg21578921	chr 4: 4393416	0.0259995	0.00346221	0.715914	2.92341	D4S234E	5833	D4S234E;D4S234E	Body;Body	D4S234E (+5833)	STX18 (+150358)	1.06317	3.88248	3.20084	3.96201
	546	cg11908659	chr 2: 62736315	0.0364433	0.0101078	0.807209	2.57212	TMEM17	-2711			TMEM17 (-2712)		0.750683	6.63705	3.11971	7.7234
	547	cg07313814	chr 1: 1272398	0.0279419	0.00584027	0.762074	2.75662	DVL1	3159	DVL1	Body	TAS1R3 (+5673)	DVL1 (+12093)	-0.670994	4.68986	2.344	4.39857
	548	cg05951817	chr 17: 28562142	-0.0259226	0.00333481	0.707036	-2.93506	SLC6A4	812	SLC6A4	5'UTR	SLC6A4 (+811)		4.98265	3.66697	1.67959	4.55867
	549	cg17445535	chr 12: 113343413	-0.0361621	0.0100389	0.806968	-2.57449	OAS1	-1325	OAS1;OAS1;OAS1	TSS1500;TSS1500;TSS1500	OAS1 (-1325)		18.3643	6.61068	14.9444	5.57408
	550	cg05796845	chr 3: 152058795	-0.0293144	0.00696164	0.762922	-2.69867	TMEM14E	-16	MBNL1;MBNL1;MBNL1;MBNL1;MBNL1;MBNL1;MBNL1;TMEM14E	Body;Body;Body;Body;Body;Body;Body;TSS200	TMEM14E (-17)		11.5406	5.13467	8.11827	4.29672
	551	cg09214243	chr 15: 29968124	0.042344	0.0106118	0.811287	2.55523	BC043570	931			FAM189A1 (-105198)	TJP1 (+146581)	8.70548	6.41268	12.3456	7.95233
	552	cg19670610	chr 4: 89455337	0.0301291	0.0075481	0.762922	2.67164	PIGY	-10382			HERC3 (-58309)	PIGY (-10383)	0.47268	4.78746	3.76368	4.96969
	553	cg05477517	chr 6: 164531576	-0.0258731	0.00325525	0.704797	-2.94255	AK093114	438941			QKI (+695902)		6.19629	3.76968	3.45394	4.04578
	554	cg21614682	chr 5: 148529782	-0.0306977	0.00792979	0.768833	-2.65504	ABLIM3	8211	ABLIM3	Body	AFAP1L1 (-121618)	ABLIM3 (+8729)	17.9991	5.87267	14.3363	4.79524
	555	cg22699977	chr 1: 1193746	-0.0323339	0.00871712	0.782839	-2.62295	UBE2J2	9626	UBE2J2;UBE2J2;LOC100128842;UBE2J2;UBE2J2	Body;Body;Body;Body;Body	FAM132A (-11645)	UBE2J2 (+15487)	10.6076	5.2153	6.724	5.53791
	556	cg03442592	chr 20: 31668141	-0.0288312	0.00668658	0.762346	-2.71206	BPIFB4	-1176	C20orf186	TSS1500	BPIFB4 (-1176)		6.35778	5.67992	3.22993	4.0267
	557	cg07385362	chr 16: 1417710	-0.0288589	0.00671574	0.762346	-2.71062	UNKL	11974	UNKL	Body	GNPTG (+15811)	UNKL (+46994)	5.67758	4.39678	2.37838	4.97555
	558	cg01820584	chr 4: 52735830	-0.027929	0.00595361	0.762346	-2.75033	DCUN1D4	26086	DCUN1D4;DCUN1D4	Body;Body	DCUN1D4 (+26555)	LRRC66 (+147955)	15.7353	5.72516	13.345	5.36717
	559	cg23926439	chr 1: 228890884	0.0268016	0.00459977	0.739733	2.8338	RHOU	20061			RAB4A (-515994)	RHOU (+20061)	-0.583551	4.08013	2.45509	4.3004
	560	cg10514890	chr 13: 114840501	-0.0266292	0.00445202	0.738708	-2.84422	RASA3	2937	RASA3	Body	GAS6 (-273456)	RASA3 (+57593)	4.55858	4.08876	1.6121	4.2265
	561	cg15603009	chr 17: 68604453	-0.0335816	0.00940336	0.796355	-2.59703	KCNJ2	433273			KCNJ2 (+438778)		8.33253	6.93309	5.52098	5.35602
	562	cg03225664	chr 1: 64599338	-0.025879	0.00342984	0.713915	-2.92633	BC040909	-21450	ROR1;ROR1	Body;Body	UBE2U (-70151)	ROR1 (+359649)	5.81402	4.11506	3.52176	4.02976
	563	cg18166144	chr 10: 129845375	-0.0354242	0.0100492	0.806968	-2.57413	PTPRE	-437	PTPRE;PTPRE	Body;TSS1500	MKI67 (+79092)	PTPRE (+140051)	6.19091	6.16515	3.24888	6.11702
	564	cg25961567	chr 2: 106363603	-0.0273719	0.0054457	0.76104	-2.77941	NCK2	2084	NCK2;NCK2	5'UTR;5'UTR	FHL2 (-347923)	NCK2 (-104600)	13.928	4.54893	10.7554	4.58777
	565	cg24119756	chr 6: 47052183	0.0279845	0.00610967	0.762346	2.74184	GPR110	-42101			GPR110 (-42102)	TNFRSF21 (+225496)	9.65035	4.34209	11.34	5.46804
	566	cg11703212	chr 13: 114271629	-0.0292655	0.00715539	0.762922	-2.68952	TFDP1	31541	TFDP1;TFDP1	Body;Body	TFDP1 (+32574)	ATP4B (+40883)	8.27598	5.16014	5.08472	4.32306
	567	cg26204682	chr 4: 105781484	0.0361329	0.0102942	0.807209	2.56579	TET2	-285547			CXXC4 (-369018)	TET2 (-286357)	4.6732	6.52124	7.94705	5.41398
	568	cg26643967	chr 19: 36485282	0.0305093	0.00803767	0.769548	2.65048	SDHAF1	-807	SDHAF1	TSS1500	SDHAF1 (-807)		7.19917	5.27082	9.15769	5.53212
	569	cg18372136	chr 6: 142871514	-0.0275002	0.00562059	0.762074	-2.76913	LOC153910	87512	LOC153910;LOC153910	Body;Body	GPR126 (+248459)	HIVEP2 (+394823)	4.15342	4.50133	1.42863	4.07967
	570	cg01426743	chr 1: 178994243	0.0294369	0.00728604	0.762922	2.68348	FAM20B	-830	FAM20B	TSS1500	FAM20B (-830)		4.6	4.47313	6.74959	5.01852
	571	cg23717725	chr 18: 20509932	-0.0314498	0.00853156	0.77753	-2.63028	RBBP8	-3362			RBBP8 (-3362)		6.67568	5.96681	3.68661	4.60336
	572	cg16701907	chr 3: 72067763	0.0273324	0.00546638	0.76104	2.77818	AK097190	81815			PROK2 (-233407)	RYBP (+428010)	7.62537	4.58776	10.4058	4.14581
	573	cg01218350	chr 2: 210517441	0.0259387	0.00369079	0.72595	2.90345	MAP2	-424	MAP2;MAP2;MAP2;MAP2	5'UTR;5'UTR;5'UTR;5'UTR	UNC80 (-119275)	MAP2 (+73039)	1.42536	3.21286	3.68278	4.64701
	574	cg07805777	chr 11: 15962932	-0.032816	0.00933382	0.796355	-2.59958	SnoMBII_202	-459493			SOX6 (+461480)	INSC (+828963)	3.5571	6.27322	0.610328	5.30425
	575	cg00527307	chr 13: 34208894	-0.0354355	0.0102525	0.807209	-2.5672	STARD13	42038			STARD13 (-348994)	RFC3 (-183311)	6.12626	5.73334	2.54442	6.78554
	576	cg00791764	chr 4: 53727839	-0.0337834	0.00974927	0.801903	-2.5846	RASL11B	-655	RASL11B	TSS1500	RASL11B (-655)		11.5577	4.97696	8.17938	5.93421
	577	cg06642895	chr 7: 27952113	0.0305713	0.00831185	0.77616	2.63913	JAZF1	79562	JAZF1	Body	TAX1BP1 (+172400)	JAZF1 (+268323)	-0.604881	5.20442	1.88546	5.93606
	578	cg26086948	chr 20: 44097731	-0.0267756	0.00502939	0.76104	-2.80515	WFDC2	-662	WFDC2	TSS1500	WFDC2 (-662)		10.2926	4.15286	7.47253	4.32135
	579	cg06473578	chr 13: 47130714	0.025374	0.00296084	0.704642	2.97177	LRCH1	3419	LRCH1;LRCH1;LRCH1	Body;Body;Body	KIAA0226L (-169080)	ESD (+240652)	20.5836	3.39512	22.582	4.13198
	580	cg12805450	chr 2: 129838865	-0.0303286	0.00820751	0.773095	-2.64341	LOC151121	192556			RAB6C (-898369)	HS6ST1 (-762695)	5.06452	4.46497	3.26318	6.39694
	581	cg16311697	chr 3: 124249497	-0.0253496	0.00291851	0.704642	-2.97619	KALRN	25912	KALRN	Body	UMPS (-199715)	KALRN (+435940)	8.54476	4.11364	5.78427	3.82694
	582	cg01341655	chr 4: 62202294	-0.0325553	0.0094072	0.796355	-2.59689	LPHN3	135321			LPHN3 (-160544)		2.66488	5.2007	-0.233331	5.34778
	583	cg17397420	chr 11: 60552236	0.0290715	0.00727487	0.762922	2.68399	MS4A10	-584	MS4A10	TSS1500	MS4A10 (-584)		6.58463	4.37729	8.61725	5.14146
	584	cg10929873	chr 12: 124972783	0.0263075	0.00451206	0.738708	2.83995	BC017209	4541	NCOR2;NCOR2	Body;Body	NCOR2 (+79226)	ZNF664 (+515022)	6.40018	3.99974	7.98678	4.47881
	585	cg18435928	chr 10: 133929736	0.0244748	0.00151523	0.676137	3.17175	JAKMIP3	11424	JAKMIP3	Body	DPYSL4 (-70677)	JAKMIP3 (+11424)	2.87344	3.59114	4.88223	3.57424
	586	cg16598670	chr 22: 23805705	0.0249504	0.00233796	0.695074	3.04356	LOC388882	23462			IGLL1 (+116789)	BCR (+283154)	2.50585	4.69898	5.15484	4.46122
	587	cg27111890	chr 21: 43823749	-0.0293092	0.00746108	0.762922	-2.67553	UBASH3A	-221	UBASH3A;UBASH3A	TSS1500;TSS1500	UBASH3A (-221)		3.94219	4.60252	1.00935	5.1817
	588	cg26271840	chr 12: 133281504	-0.0266044	0.00496069	0.759539	-2.80958	PGAM5	-5888	PXMP2	3'UTR	PGAM5 (-5888)	PXMP2 (+17313)	6.65422	4.70478	3.88971	4.36398
	589	cg10207928	chr 1: 8963950	-0.0259354	0.00399346	0.726509	-2.87868	ENO1	-24799			CA6 (-41971)	ENO1 (-24800)	5.67343	3.95778	2.23956	4.42562
	590	cg09257677	chr 17: 77078400	0.0279968	0.00652143	0.762346	2.72034	ENGASE	2112	ENGASE	Body	ENGASE (+7382)	RBFOX3 (+400279)	0.257096	4.69787	2.6927	4.88337
	591	cg21153102	chr 15: 41252147	-0.0294853	0.00770893	0.765712	-2.66456	CHAC1	6512			CHAC1 (+6512)	INO80 (+156192)	7.42744	5.37512	4.53121	4.94168
	592	cg08952407	chr 5: 42756860	-0.03946	0.0112344	0.818055	-2.53532	CCDC152	-59	CCDC152	TSS200	SEPP1 (+55163)	GHR (+332984)	2.11376	5.94568	-1.50949	7.19984
	593	cg20438472	chr 3: 184293365	-0.0242151	0.00119569	0.649585	-3.23991	EPHB3	13779	EPHB3	Body	VPS8 (-236565)	EPHB3 (+13779)	8.80048	3.34174	6.11752	3.53462
	594	cg11751810	chr 17: 88286	0.0246258	0.00189663	0.676137	3.10596	DOC2B	-56866	RPH3AL	Body	DOC2B (-56867)	RPH3AL (+114346)	3.23128	3.1388	5.15054	4.01252
	595	cg23825897	chr 6: 161655043	-0.0245701	0.00180662	0.676137	-3.12031	AGPAT4	-1709	AGPAT4	5'UTR	AGPAT4 (+40063)	MAP3K4 (+242222)	10.9241	3.26124	8.13497	3.46439
	596	cg07814414	chr 15: 31774773	-0.025315	0.00305253	0.704642	-2.9624	AK093758	89728			KLF13 (+155691)	OTUD7A (+172768)	2.85849	3.78418	0.734337	4.03409
	597	cg02552250	chr 13: 49066868	0.0244134	0.00159734	0.676137	3.15639	RCBTB2	40448	RCBTB2	Body	LPAR6 (-79216)	RCBTB2 (+40447)	16.3525	3.60245	18.5598	3.52618
	598	cg20360395	chr 12: 132671235	-0.0330316	0.00992815	0.805163	-2.57832	GALNT9	19338			NOC4L (+42243)	GALNT9 (+234669)	10.4335	5.74216	7.82837	6.11766
	599	cg06119201	chr 2: 116152853	0.02481	0.00232195	0.695074	3.04563	DPP10	233170	DPP10;DPP10	Body;Body	DPP10 (+233341)		3.53532	3.73263	5.86859	3.9564
	600	cg03177847	chr 6: 76044678	0.0364983	0.0110655	0.817984	2.54062	FILIP1	-172	FILIP1	Body	SENP6 (-266943)	TMEM30A (-50047)	13.9897	6.67585	17.8949	6.62396
	601	cg23836020	chr 6: 72094922	-0.030136	0.00843257	0.776425	-2.63424	MIR30C2	-8188			RIMS1 (-501727)	OGFRL1 (+96446)	13.3523	4.94806	10.3757	5.22597
	602	cg17901924	chr 1: 233124418	-0.0302545	0.0085658	0.777965	-2.62891	NTPCR	38049	PCNXL2	Body	NTPCR (+38049)	PCNXL2 (+307040)	9.55124	4.76137	6.02831	5.89573
	603	cg18229767	chr 11: 67776576	0.0261835	0.00466218	0.744078	2.82949	ALDH3B1	529	ALDH3B1;ALDH3B1;ALDH3B1	TSS1500;TSS1500;5'UTR	UNC93B1 (-4984)	ALDH3B1 (-1213)	7.19768	3.94427	10.3673	3.86447
	604	cg05223146	chr 14: 77647063	-0.0318366	0.00944004	0.798251	-2.59569	TMEM63C	-1038	TMEM63C	TSS1500	TMEM63C (-1038)		13.0957	4.85343	9.42088	6.17373
	605	cg06939451	chr 5: 81043172	-0.0311919	0.00922592	0.795973	-2.60357	SSBP2	3745	SSBP2	Body	ACOT12 (-353185)	SSBP2 (+3899)	16.8549	5.58158	13.4385	4.79327
	606	cg23809813	chr 10: 90217672	0.0237597	0.000533127	0.599465	3.46354	RNLS	87607	RNLS;RNLS	Body;Body	KLLN (-594479)	RNLS (+125409)	14.018	3.15993	16.9074	3.02671
	607	cg01685893	chr 11: 112048262	0.0278175	0.00655962	0.762346	2.71841	BCO2	1174	BCO2;BCO2	5'UTR;Body	PTS (-48825)	BCO2 (+2055)	10.1346	4.26647	12.4283	4.59451
	608	cg07795082	chr 22: 28200494	0.0402297	0.0115293	0.820215	2.52623	MN1	-3008			MN1 (-3009)		11.3925	6.49106	14.4263	7.82483
	609	cg18238996	chr 12: 55412514	0.0276546	0.0064183	0.762346	2.72561	NEUROD4	-1214	NEUROD4	TSS1500	NEUROD4 (-1214)		1.57407	4.60698	4.08929	4.44806
	610	cg01017228	chr 4: 745235	0.037516	0.0113727	0.819769	2.53103	DKFZp547K2416	-16053	PCGF3	Body	PCGF3 (+45663)	CPLX1 (+74709)	10.2763	6.23365	13.011	7.49551
	611	cg10775195	chr 14: 77292399	0.0253916	0.0034592	0.715914	2.92368	C14orf166B	-325	C14orf166B	TSS1500	VASH1 (+64165)	IRF2BPL (+202634)	3.53843	3.72415	5.911	4.26866
	612	cg22630733	chr 11: 334833	-0.029118	0.00776342	0.766527	-2.66219	IFITM3	-13919			B4GALNT4 (-34961)	IFITM3 (-13920)	3.431	5.81203	0.642853	5.29243
	613	cg20433382	chr 6: 125331312	-0.02781	0.00669243	0.762346	-2.71177	RNF217	26799	RNF217	Body	TPD52L1 (-143566)	RNF217 (+26799)	13.2705	4.37263	11.017	4.86484
	614	cg11945096	chr 11: 8123205	-0.0237543	0.000636408	0.60936	-3.4156	TUB	20297	TUB;TUB	3'UTR;3'UTR	TUB (+63026)	RIC3 (+67384)	10.4382	3.34108	8.19824	3.21238
	615	cg09548897	chr 16: 341277	-0.0250561	0.0029424	0.704642	-2.97369	PDIA2	8663	AXIN1;AXIN1	Body;Body	PDIA2 (+8663)	AXIN1 (+61398)	2.74995	3.76849	0.373189	3.83747
	616	cg26025906	chr 8: 17077631	0.0280866	0.00695822	0.762922	2.69884	CNOT7	25125	ZDHHC2	3'UTR	CNOT7 (+26755)	ZDHHC2 (+63796)	9.20193	5.04826	11.4333	4.91494
	617	cg05711506	chr 16: 1813796	0.0347986	0.0109177	0.817474	2.54532	NME3	7914	MAPK8IP3;MAPK8IP3	Body;Body	NME3 (+7913)	MAPK8IP3 (+57576)	-0.0512702	5.7675	3.19367	7.77778
	618	cg12956472	chr 3: 119791225	0.0307185	0.00925237	0.795973	2.60259	GSK3B	22039	GSK3B;GSK3B	Body;Body	GSK3B (-208774)	GSK3B (+22038)	7.62359	5.11909	9.77311	5.78518
	619	cg13994833	chr 10: 11344395	0.0251763	0.00317248	0.704642	2.95051	AF007147	48642	CUGBP2;CUGBP2;CUGBP2;CUGBP2	Body;Body;Body;Body	USP6NL (+229878)	CELF2 (+284503)	0.123415	3.5337	2.66042	3.46572
	620	cg12392126	chr 12: 12240363	0.0240538	0.00124502	0.651878	3.22836	BCL2L14	8131	BCL2L14;BCL2L14;BCL2L14	Body;Body;Body	BCL2L14 (+16486)	LRP6 (+179447)	1.06668	3.32964	3.39988	3.12955
	621	cg24062526	chr 2: 86255804	0.0327132	0.0102199	0.807209	2.5683	LOC90784	-4813	POLR1A	Body	ST3GAL5 (-139648)	POLR1A (+77473)	22.5278	5.79012	25.1961	6.22412
	622	cg10158369	chr 16: 89162475	-0.0239756	0.00112801	0.633498	-3.25648	ACSF3	2259	ACSF3;ACSF3;ACSF3	Body;5'UTR;5'UTR	CDH15 (-75687)	ACSF3 (+2259)	8.68486	4.8791	6.83715	3.67402
	623	cg01122302	chr 17: 42392668	0.0273119	0.00632954	0.762346	2.7302	RUNDC3A	6742	RUNDC3A;RUNDC3A;RUNDC3A	Body;Body;Body	RUNDC3A (+6742)	SLC25A39 (+9548)	9.72497	4.65325	11.8292	5.51727
	624	cg18188010	chr 15: 42187036	-0.025306	0.00349016	0.716449	-2.92091	SPTBN5	-761	SPTBN5	TSS1500	SPTBN5 (-762)		8.16661	3.96937	5.65687	4.04573
	625	cg26682904	chr 11: 101787410	-0.0307155	0.0093804	0.796355	-2.59787	ANGPTL5	-157	ANGPTL5;KIAA1377	TSS200;Body	ANGPTL5 (-158)		13.6684	5.31818	10.6297	4.52997
	626	cg06966613	chr 16: 85542891	-0.0405468	0.0119436	0.825001	-2.51381	KIAA0182	-102137			KIAA0182 (-104032)	KIAA0513 (+481482)	8.00481	8.00514	3.01653	6.68967
	627	cg07308751	chr 6: 131287984	-0.0320862	0.0099896	0.805593	-2.57619	EPB41L2	3639	EPB41L2;EPB41L2;EPB41L2	5'UTR;5'UTR;5'UTR	EPB41L2 (+96477)	TMEM200A (+529723)	7.45944	5.44308	5.25851	6.4657
	628	cg04927360	chr 1: 159752179	0.0242046	0.00170509	0.676137	3.1373	DUSP23	1372	DUSP23	3'UTR	FCRL6 (-19993)	DUSP23 (+1421)	12.2415	4.3278	14.4413	3.3237
	629	cg22117062	chr 4: 2794231	-0.0257762	0.00436284	0.734367	-2.85066	SH3BP2	-518	SH3BP2	TSS1500	TNIP2 (-36129)	SH3BP2 (-25680)	29.0987	4.55245	26.8258	4.63242
	630	cg03126561	chr 11: 12434050	-0.0233775	0.000107331	0.461884	-3.87339	PARVA	14263	PARVA	Body	TEAD1 (-261918)	PARVA (+35025)	8.45939	3.12323	5.78455	2.84166
	631	cg05049980	chr 2: 46612798	0.0325746	0.0103204	0.807209	2.56491	EPAS1	5960	EPAS1	3'UTR	LOC388946 (-93905)	EPAS1 (+88258)	6.85009	5.88922	9.08675	6.90432
	632	cg11885357	chr 3: 138152902	0.0269761	0.00602756	0.762346	2.74628	ESYT3	-512	ESYT3	TSS1500	ESYT3 (-512)		-0.120628	4.86893	1.46555	5.30695
	633	cg10132110	chr 3: 64391669	-0.0281301	0.00723052	0.762922	-2.68604	AK125532	-155717			PRICKLE2 (-180539)	ADAMTS9 (+281695)	3.418	4.80904	1.03958	4.88423
	634	cg14320920	chr 10: 97792309	0.027257	0.00635233	0.762346	2.72902	CCNJ	-10849	CC2D2B;CC2D2B	3'UTR;3'UTR	CCNJ (-10849)	ENTPD1 (+320774)	5.02548	4.22798	7.69912	4.36128
	635	cg13844779	chr 9: 82093630	-0.0262598	0.0053087	0.76104	-2.78768	TLE4	-93247			TLE4 (-93247)		4.95043	4.11049	2.52545	4.67964
	636	cg23218895	chr 17: 43246883	-0.0254789	0.00398425	0.726509	-2.87941	HEXIM2	1969	HEXIM2	Body	FMNL1 (-52408)	HEXIM2 (+8620)	4.1252	3.58435	1.91544	4.35914
	637	cg05662839	chr 18: 77313827	-0.026016	0.00493217	0.75835	-2.81143	NFATC1	26709			CTDP1 (-125973)	NFATC1 (+153502)	1.8437	4.36317	-0.342543	3.97733
	638	cg21449597	chr 4: 154036828	0.0261468	0.0051418	0.76104	2.79801	TRIM2	-37441			TRIM2 (-88769)	FHDC1 (+172694)	3.91509	4.59701	6.33772	3.60701
	639	cg19684783	chr 5: 40905255	0.0323093	0.0102795	0.807209	2.56628	C7	-4343			C7 (-4343)		15.4141	6.047	18.0737	5.09945
	640	cg10066231	chr 7: 99646992	0.0299009	0.00893311	0.788618	2.6146	ZSCAN21	-424	ZSCAN21	TSS1500	ZSCAN21 (-424)		20.5375	4.4071	22.2002	6.46445
	641	cg18770029	chr 6: 120120662	0.0365746	0.0116768	0.821613	2.52176	AK097101	-308195			MAN1A1 (-449737)		1.68418	6.6879	4.54158	6.03819
	642	cg07317802	chr 2: 12880542	0.0250594	0.0032236	0.704642	2.94557	MIR3125	3050	TRIB2;TRIB2	Body;Body	TRIB2 (+23545)		10.2697	3.40639	12.2401	4.14667
	643	cg08564874	chr 7: 34696723	0.0232784	2.49582e-05	0.393009	4.21518	NPSR1	-1173	NPSR1;NPSR1	TSS1500;TSS1500	NPSR1 (-1173)		0.555741	2.90497	2.97813	2.58603
	644	cg01416168	chr 1: 48687359	0.0243897	0.00211959	0.695074	3.07294	SLC5A9	-997	SLC5A9;SLC5A9	TSS1500;TSS1500	SLC5A9 (-997)		2.38656	3.50469	4.69366	3.1941
	645	cg01079840	chr 6: 30520405	-0.0261721	0.00529738	0.76104	-2.78837	GNL1	3092	GNL1	Body	PRR3 (-4080)		4.04922	3.99449	1.91656	4.59049
	646	cg04026948	chr 8: 97953330	-0.034111	0.0111158	0.817984	-2.53904	PGCP	156239	PGCP	Body	PGCP (+295832)	TSPYL5 (+336845)	3.5638	5.0107	-0.0761856	6.18669
	647	cg27455061	chr 2: 144498168	-0.0242137	0.00189228	0.676137	-3.10664	ARHGAP15	305006	ARHGAP15	Body	GTDC1 (+591914)	ARHGAP15 (+611270)	6.223	4.37319	3.76673	4.08228
	648	cg09004195	chr 2: 222323493	-0.0276794	0.00692958	0.762922	-2.70021	EPHA4	113508	EPHA4	Body	EPHA4 (+113516)		2.8208	4.61009	0.202177	5.12852
	649	cg15550953	chr 1: 6036414	0.0264156	0.00573276	0.762074	2.76269	KCNAB2	-15943	NPHP4	Body	NPHP4 (+16118)		2.84714	3.83848	4.78567	4.78551
	650	cg15035133	chr 22: 37962637	0.0239962	0.00160632	0.676137	3.15476	CDC42EP1	6167	CDC42EP1	Body	CDC42EP1 (+6167)	LGALS2 (+13386)	10.3587	3.19608	12.6054	3.18402
	651	cg01342981	chr 2: 127415063	0.0272473	0.0065959	0.762346	2.71659	GYPC	1380	GYPC;GYPC	Body;Body	GYPC (+1380)	BIN1 (+449839)	26.9545	4.38976	29.2841	4.98673
	652	cg22329776	chr 12: 76243294	0.0309769	0.00994106	0.805163	2.57787	SNORA70	-160245			KRR1 (-337877)	PHLDA1 (+182261)	11.7898	5.2942	13.7581	5.57187
	653	cg25954028	chr 12: 124941423	0.0264432	0.00582704	0.762074	2.75736	BC017209	-26819	NCOR2;NCOR2	Body;Body	NCOR2 (+110586)	ZNF664 (+483662)	17.7724	4.76055	20.4711	4.61818
	654	cg02661728	chr 7: 17018326	-0.0264402	0.0058351	0.762074	-2.75691	AGR3	-96713			AHR (-319949)	AGR3 (-96714)	6.94461	4.65277	4.52161	4.18662
	655	cg19667811	chr 10: 30405328	0.0260667	0.00529738	0.76104	2.78837	KIAA1462	-908			SVIL (-481428)	MTPAP (+232938)	2.17059	4.60469	4.84011	4.54302
	656	cg20635389	chr 2: 207859049	0.0253946	0.00419613	0.729778	2.86303	CPO	54772			CPO (+54772)	KLF7 (+171564)	16.3465	3.629	18.7957	3.77806
	657	cg11719952	chr 11: 75140567	0.0268091	0.00630975	0.762346	2.73123	KLHL35	1107	KLHL35	Body	RPS3 (+30006)	GDPD5 (+96031)	-0.310735	4.30687	2.1583	4.21765
	658	cg04226745	chr 17: 54894051	-0.0254295	0.00424436	0.730416	-2.85941	C17orf67	-680	C17orf67	TSS1500	C17orf67 (-681)		5.64038	4.30456	3.41178	3.63973
	659	cg18231848	chr 1: 26499103	0.0312019	0.0102437	0.807209	2.56749	ZNF593	2716			CNKSR1 (-4877)		11.9028	5.46716	14.6497	5.32355
	660	cg13767306	chr 22: 37710703	0.023612	0.000964669	0.617879	3.30063	CYTH4	32209	CYTH4	3'UTR	CYTH4 (+32209)	ELFN2 (+112801)	5.03456	3.69805	7.44952	3.7337
	661	cg24703354	chr 17: 6936921	-0.0287425	0.00832117	0.77616	-2.63875	SLC16A13	-2472			SLC16A13 (-2472)		9.13768	4.92995	6.42486	4.87396
	662	cg04882349	chr 1: 53098299	-0.0249183	0.00334192	0.707036	-2.9344	FAM159A	-766	FAM159A	TSS1500	FAM159A (-766)		8.19026	3.9486	5.7263	3.99548
	663	cg18480675	chr 3: 28281945	-0.0338673	0.0113791	0.819769	-2.53084	CMC1	-1178	CMC1	TSS1500	CMC1 (-1178)		16.7335	5.33873	13.849	6.32732
	664	cg11105292	chr 7: 32802564	0.0472193	0.0127482	0.825001	2.49073	LOC401321	4667			FKBP9 (-194440)	AVL9 (+267389)	2.64325	8.31265	5.80987	9.43758
	665	cg12184450	chr 17: 35685086	0.033246	0.0112321	0.818055	2.53539	ACACA	-28394	ACACA;ACACA;ACACA	Body;Body;Body	C17orf78 (-47898)	AATF (+378912)	2.80693	6.43334	5.76729	4.72743
	666	cg03630596	chr 9: 139925856	0.0274249	0.00700614	0.762922	2.69655	FUT7	1436	C9orf139;FUT7	5'UTR;Body	ABCA2 (-3117)		-0.128822	3.96641	2.43535	4.58699
	667	cg16300556	chr 5: 758981	-0.0266516	0.00623602	0.762346	-2.73511	ZDHHC11	64945			TPPP (-65472)	ZDHHC11 (+92119)	4.21656	5.19852	1.56894	4.46869
	668	cg02492873	chr 2: 25193821	-0.0264117	0.00597201	0.762346	-2.74931	DNAJC27	664	DNAJC27	Body	ADCY3 (-51767)	DNAJC27 (+1141)	15.9264	4.48462	13.0485	3.85675
	669	cg17837712	chr 10: 124638200	0.0259523	0.00533007	0.76104	2.78638	LOC399815	-948	FAM24B;LOC399815	5'UTR;TSS1500	FAM24B (+956)		6.9371	3.94811	8.90746	4.21299
	670	cg03994820	chr 3: 350682	0.027105	0.00667509	0.762346	2.71263	CHL1	-10683	CHL1	5'UTR	CNTN6 (-783946)	CHL1 (+112404)	4.96824	4.18296	7.05806	4.86399
	671	cg09439204	chr 12: 54090464	0.0273528	0.00697514	0.762922	2.69803	CALCOCO1	18013			ATP5G2 (-20356)	CALCOCO1 (+30842)	9.53819	4.4237	12.1231	4.2553
	672	cg09029902	chr 20: 52199594	0.0300562	0.0096508	0.799239	2.5881	ZNF217	113	ZNF217;ZNF217	5'UTR;1stExon	ZNF217 (+112)		-0.338344	5.17983	2.02463	5.43672
	673	cg16485800	chr 5: 93076260	-0.023777	0.00146949	0.676137	-3.18064	POU5F2	1049	FAM172A;FAM172A;POU5F2;POU5F2;FAM172A;FAM172A	Body;Body;1stExon;3'UTR;Body;Body	POU5F2 (+1048)	NR2F1 (+157218)	8.0053	3.16719	6.01955	3.54024
	674	cg25305776	chr 8: 30573560	-0.0279833	0.00764571	0.764775	-2.66733	GSR	11926	GSR	Body	GTF2E2 (-57823)	GSR (+11925)	5.64719	4.10776	2.71133	4.97121
	675	cg03234603	chr 17: 2515392	0.0331605	0.0112577	0.818055	2.5346	PAFAH1B1	18470	PAFAH1B1	5'UTR	PAFAH1B1 (+18470)	KIAA0664 (+99534)	7.19231	5.47937	9.70672	5.83544
	676	cg07010075	chr 2: 121199631	0.0234345	0.000768067	0.617879	3.36405	LOC84931	24294			GLI2 (-355235)	INHBB (+95913)	0.363948	3.31142	2.16549	3.336
	677	cg01020475	chr 13: 114304812	-0.0258072	0.00517621	0.76104	-2.79586	ATP4B	7701	ATP4B	Body	ATP4B (+7700)	TFDP1 (+65757)	3.19275	4.56722	0.596207	3.87423
	678	cg26811705	chr 11: 118781408	0.047323	0.0129176	0.826062	2.48603	MIR4492	-8	BCL9L;BCL9L	1stExon;5'UTR	BCL9L (+204)		9.82421	9.40199	11.9006	9.33609
	679	cg21620078	chr 5: 55307817	-0.0296954	0.00947766	0.798324	-2.59433	AK055666	16823			MAP3K1 (-803082)	IL6ST (-16997)	1.9428	5.25961	-0.762847	4.70589
	680	cg05988605	chr 8: 28173887	0.0254923	0.00470302	0.744434	2.8267	PNOC	-761	PNOC	TSS1500	PNOC (-761)		6.4349	3.9843	8.4551	3.9575
	681	cg21263710	chr 18: 49865488	0.0293472	0.00923115	0.795973	2.60337	DCC	-1053	DCC	TSS1500	DCC (-1053)		0.480308	4.39408	2.8502	5.34787
	682	cg26641148	chr 2: 214154452	-0.0249574	0.0037506	0.726084	-2.89841	SPAG16	5313	SPAG16;SPAG16	Body;Body	SPAG16 (+5337)		13.1403	3.52541	10.6223	3.79647
	683	cg17221226	chr 11: 64414192	-0.0240082	0.00202867	0.686846	-3.086	NRXN2	-3405	NRXN2;NRXN2	Body;Body	SLC22A12 (+55911)	NRXN2 (+76467)	1.94607	3.53874	-0.536786	3.17389
	684	cg06898463	chr 10: 70089597	-0.0302961	0.0101704	0.807209	-2.56998	HNRNPH3	-2170	PBLD;PBLD	5'UTR;5'UTR	HNRNPH3 (-2170)		20.6265	4.78602	17.7902	5.52298
	685	cg15688713	chr 3: 99982392	-0.0402239	0.0128158	0.825001	-2.48885	TBC1D23	2707	TBC1D23	Body	NIT2 (-71169)	TBC1D23 (+2707)	15.7779	7.31128	11.6544	6.65009
	686	cg25730564	chr 2: 236100751	0.0367051	0.0125772	0.825001	2.49552	BC148242	196005			AGAP1 (-301981)	SH3BP4 (+240124)	0.499734	8.38991	3.11431	6.56286
	687	cg02937751	chr 10: 72358696	-0.025109	0.0041091	0.726995	-2.86966	PRF1	3835	PRF1;PRF1	Body;Body	NODAL (-157232)	PRF1 (+3834)	1.80341	4.10323	-0.459487	3.27286
	688	cg21783242	chr 7: 139249337	0.0237272	0.00162037	0.676137	3.15221	CLEC2L	40664	HIPK2;HIPK2	3'UTR;3'UTR	CLEC2L (+40664)	HIPK2 (+228355)	8.69534	2.73419	10.7495	3.48472
	689	cg22132982	chr 3: 13916247	0.0251078	0.00418353	0.729778	2.86398	WNT7A	5371	WNT7A	Body	WNT7A (+5370)	FBLN2 (+325623)	3.44287	3.81308	5.48598	3.75901
	690	cg14108327	chr 4: 890186	-0.0297836	0.00993254	0.805163	-2.57817	GAK	15389	GAK	Body	CPLX1 (-70242)	GAK (+35987)	9.62012	5.53652	6.52664	4.75096
	691	cg16721257	chr 8: 130954845	-0.0302707	0.01036	0.807209	-2.56358	FAM49B	-2845			GSDMC (-155712)	ASAP1 (+501060)	3.42294	5.28966	-0.138505	5.31911
	692	cg20847292	chr 1: 155931629	0.023071	0.000247055	0.480574	3.66529	ARHGEF2	-10566	ARHGEF2;ARHGEF2;ARHGEF2	Body;Body;Body	ARHGEF2 (+16706)	RXFP4 (+20150)	-0.130964	3.13376	1.87285	3.73861
	693	cg11922514	chr 2: 210824069	-0.0310804	0.0108436	0.816085	-2.5477	UNC80	-143	UNC80;UNC80	Body;Body	RPE (-43282)	UNC80 (+187353)	19.3438	5.03024	16.0747	5.40093
	694	cg20325547	chr 1: 9431594	0.0287616	0.00904529	0.791479	2.61034	SPSB1	15829			SLC25A33 (-167933)	SPSB1 (+78654)	8.98673	5.26889	10.6839	5.50662
	695	cg02589828	chr 5: 133967994	0.0243815	0.0029203	0.704642	2.97601	SAR1B	539	SAR1B;SAR1B	5'UTR;5'UTR	SAR1B (+538)		1.80768	3.3898	3.90776	3.8031
	696	cg20690028	chr 5: 126852955	-0.0234264	0.00105755	0.617879	-3.27475	PRRC1	-353	PRRC1	TSS1500	PRRC1 (-353)		7.52705	3.86372	5.05962	3.42413
	697	cg07553108	chr 10: 34398955	-0.0249422	0.003997	0.726509	-2.8784	AX765719	147			NRP1 (-775123)	PARD3 (+705297)	1.36818	4.08238	-0.466319	4.05101
	698	cg02902313	chr 6: 32166206	-0.026926	0.0069652	0.762922	-2.6985	NOTCH4	-835	NOTCH4	Body	GPSM3 (-2907)		14.3543	4.07326	11.1059	4.51894
	699	cg02556655	chr 11: 63975026	0.0322578	0.0113857	0.819848	2.53063	FERMT3	875	FERMT3;FERMT3	Body;Body	FERMT3 (+875)		7.46196	4.61078	9.68205	6.29123
	700	cg26836402	chr 16: 87252649	0.038649	0.0130351	0.826507	2.48281	AK125749	83719			FBXO31 (+164744)	FOXL1 (+640535)	2.51834	6.66323	5.66707	6.98024
	701	cg12028842	chr 19: 30305374	-0.0258563	0.00572848	0.762074	-2.76293	CCNE1	1814	CCNE1;CCNE1	Body;Body	URI1 (-127771)	CCNE1 (+2474)	3.75865	4.56019	0.700171	3.82797
	702	cg06687305	chr 1: 46088486	-0.0262663	0.00639665	0.762346	-2.72672	CCDC17	1245	CCDC17	Body	NASP (+38827)	GPBP1L1 (+63815)	9.12817	3.87401	6.60391	4.72427
	703	cg23015991	chr 12: 20556313	0.0240122	0.00240816	0.695074	3.03465	PDE3A	34135	PDE3A	Body	SLCO1C1 (-292085)	PDE3A (+34135)	4.16634	3.60147	6.55055	3.45594
	704	cg08755703	chr 16: 54394989	-0.0277286	0.00792682	0.768833	-2.65517	IRX3	-74611			IRX5 (-570121)	IRX3 (-74612)	3.53942	4.50089	0.815047	4.44262
	705	cg05121497	chr 18: 60186078	0.0280254	0.00834436	0.77616	2.63781	ZCCHC2	-4579			ZCCHC2 (-4579)		0.123971	4.20889	3.20101	4.63779
	706	cg15391651	chr 1: 165132273	0.0247965	0.00385989	0.726245	2.88939	LMX1A	50019			LMX1A (+193204)	PBX1 (+603677)	2.06824	3.65129	4.19057	3.77373
	707	cg10426084	chr 17: 1640472	0.0264176	0.00661664	0.762346	2.71555	SERPINF2	-5657	WDR81;WDR81;WDR81;WDR81	Body;Body;Body;Body	TLCD2 (-26811)	SERPINF2 (-5657)	1.28547	4.70002	4.31452	4.55847
	708	cg03662014	chr 16: 29086271	0.0308832	0.0109555	0.817474	2.54411	RRN3P2	109	RRN3P2	Body	LAT (+90125)	NPIPL1 (+329537)	0.137313	6.98309	1.89084	7.26961
	709	cg02698731	chr 17: 79516420	-0.0234268	0.00124834	0.651878	-3.2276	C17orf70	-896	C17orf70;C17orf70	Body;Body	C17orf70 (+3008)	FSCN2 (+21004)	13.4141	3.08984	10.7633	3.71454
	710	cg04398180	chr 13: 114103452	-0.0283131	0.0087319	0.782839	-2.62238	ADPRHL1	5	ADPRHL1;ADPRHL1;ADPRHL1	1stExon;5'UTR;Body	GRTP1 (-84990)	ADPRHL1 (+4386)	12.0367	4.83801	8.92096	4.55233
	711	cg21775279	chr 1: 28285385	-0.0273599	0.00760617	0.764375	-2.66907	XKR8	-1118	XKR8;SMPDL3B	TSS1500;3'UTR	XKR8 (-1118)		5.81121	4.8896	3.56788	3.8058
	712	cg05936516	chr 5: 114507066	0.0316266	0.0112713	0.818055	2.53417	TRIM36	-1408	TRIM36;TRIM36	Body;Body	TRIM36 (+9176)	KCNN2 (+809051)	10.0846	6.1393	12.3812	5.65665
	713	cg16900264	chr 15: 69996022	0.02976	0.0102399	0.807209	2.56762	AK097902	111555			RPLP1 (+250864)	TLE3 (+394233)	-0.219277	6.05396	2.85405	5.59042
	714	cg07312051	chr 1: 15656086	0.024123	0.00271036	0.695074	2.99881	FHAD1	-12145	FHAD1	Body	EFHD2 (-80304)	TMEM51 (+175858)	6.77431	2.71712	9.00911	3.92362
	715	cg13250679	chr 14: 104647055	0.0252633	0.00482813	0.753724	2.81828	KIF26A	41996	KIF26A	3'UTR	C14orf180 (-399000)	KIF26A (+41996)	-0.326293	3.94078	1.56089	4.75993
	716	cg11104736	chr 4: 7301529	0.0289667	0.00948561	0.798324	2.59404	MIR4798	-10647	SORCS2	Body	SORCS2 (+107156)	PSAPL1 (+135170)	0.786729	6.07007	2.75807	6.42658
	717	cg16968885	chr 1: 103574619	0.03051	0.010837	0.816083	2.54791	COL11A1	-567	COL11A1;COL11A1;COL11A1;COL11A1	TSS1500;TSS1500;TSS1500;TSS1500	COL11A1 (-568)		-1.12873	5.03619	2.19524	5.00777
	718	cg11945474	chr 2: 55717980	0.0265464	0.00680591	0.762346	2.70619	CCDC104	-28759			CCDC88A (-70924)	SMEK2 (+127132)	6.35529	5.01203	8.2035	4.71144
	719	cg22012476	chr 1: 168664941	-0.0234448	0.00137493	0.668275	-3.19986	DPT	33501	DPT	3'UTR	DPT (+33500)	XCL1 (+119231)	19.3104	3.65884	16.6625	4.10201
	720	cg18690282	chr 5: 14251621	-0.0245645	0.00351078	0.718206	-2.91907	TRIO	-41499	TRIO	Body	TRIO (+107793)	ANKH (+620265)	6.48572	3.51022	3.67434	4.26262
	721	cg22273231	chr 17: 17910351	-0.0249222	0.00420593	0.729778	-2.86229	BC150162	19732	LRRC48;LRRC48;LRRC48;LRRC48	Body;Body;Body;Body	ATPAF2 (+32128)	LRRC48 (+34225)	12.3092	4.30486	10.1736	4.55743
	722	cg15575967	chr 1: 33648734	0.0272207	0.00750276	0.762922	2.67366	TRIM62	-1063	TRIM62	TSS1500	TRIM62 (-1064)		1.54625	4.40612	3.96321	4.49837
	723	cg08354681	chr 6: 4773278	0.0232455	0.000939042	0.617879	3.30818	CDYL	-3401	CDYL	Body	CDYL (-3401)		2.2163	3.16586	4.6542	3.40458
	724	cg14872762	chr 11: 133399769	0.0263194	0.00665291	0.762346	2.71374	OPCML	2634	OPCML	Body	OPCML (-586733)	SPATA19 (+315622)	2.88633	5.29588	4.9906	4.44819
	725	cg23111196	chr 5: 60603263	-0.0292951	0.00989726	0.805163	-2.5794	ZSWIM6	-24836			C5orf43 (-144962)	ZSWIM6 (-24836)	12.032	5.63361	8.9985	4.42516
	726	cg19015589	chr 6: 71662998	-0.0296174	0.0102266	0.807209	-2.56807	B3GAT2	3790	B3GAT2	Body	B3GAT2 (+3789)	SMAP1 (+285520)	7.30978	5.31193	4.03718	5.18134
	727	cg01251476	chr 9: 77566080	0.0272802	0.00763557	0.764775	2.66777	C9orf40	1722	C9orf40	Body	TRPM6 (-63445)	C9orf95 (+137052)	7.84005	5.06865	10.1952	4.59215
	728	cg15921228	chr 12: 52240368	-0.0236382	0.00185842	0.676137	-3.11197	FIGNL2	-14667			ACVRL1 (-65744)	FIGNL2 (-14668)	13.1972	3.88817	11.0304	3.38903
	729	cg12462720	chr 20: 62739073	0.0248752	0.00419664	0.729778	2.86299	NPBWR2	-889	NPBWR2	TSS1500	NPBWR2 (-890)		7.81425	3.57342	9.77387	4.2081
	730	cg08240074	chr 14: 23903787	0.0380479	0.013288	0.826951	2.47595	MYH7	1083	MYH7	5'UTR	MYH6 (-26302)	MYH7 (+1082)	8.8818	3.01587	12.4024	8.34438
	731	cg20817175	chr 1: 11107306	-0.0233061	0.00105234	0.617879	-3.27615	MASP2	-10	MASP2;MASP2	TSS200;TSS200	MASP2 (-11)		9.57662	2.95191	7.62712	3.33599
	732	cg02411895	chr 19: 6492572	0.0246877	0.00391879	0.726509	2.88463	JA429441	-3396			DENND1C (-10775)	TUBB4A (+9757)	-0.678151	4.93713	2.02928	4.41668
	733	cg16878676	chr 11: 14309451	0.0274411	0.00789233	0.76796	2.65664	RRAS2	70580	RRAS2;RRAS2	Body;Body	RRAS2 (+71278)	SPON1 (+325268)	-0.0270202	4.98681	2.3949	4.9134
	734	cg19668397	chr 10: 127451340	0.0232085	0.000915605	0.617879	3.31525	MMP21	13050	C10orf137	Body	MMP21 (+13049)	C10orf137 (+43257)	2.64045	2.98618	4.75064	2.99872
	735	cg06612736	chr 9: 72375599	-0.0344705	0.012637	0.825001	-2.49384	PTAR1	-723	PTAR1	TSS1500	PTAR1 (-724)		4.18829	5.99431	0.908181	6.08757
	736	cg26262157	chr 10: 6214079	0.0261116	0.00640157	0.762346	2.72647	MIR3155B	-19854	PFKFB3	Body	PFKFB3 (-30760)	RBM17 (+83131)	7.98606	5.05709	10.2904	3.59015
	737	cg17406359	chr 21: 45773189	-0.0324152	0.0118632	0.823098	-2.51619	TRPM2	51	TRPM2	TSS1500	TRPM2 (-294)		7.43527	5.288	3.97829	5.64136
	738	cg23112821	chr 14: 100658902	-0.0285169	0.00929428	0.796355	-2.60104	DEGS2	-32890			YY1 (-46199)	DEGS2 (-32891)	21.0449	4.85399	18.1845	4.55004
	739	cg00024494	chr 16: 73096842	0.0325637	0.0119986	0.825001	2.51219	ZFHX3	-4308			ZFHX3 (-14569)		-0.150911	5.9403	2.58209	5.79961
	740	cg15126733	chr 11: 562188	-0.024336	0.00327775	0.704797	-2.94041	RASSF7	739	RASSF7;C11orf35;RASSF7;RASSF7	Body;TSS1500;Body;Body	RASSF7 (+739)		8.57269	4.21687	6.32138	4.10965
	741	cg07092111	chr 10: 32621403	-0.0234434	0.00165315	0.676137	-3.14636	EPC1	14710	EPC1	Body	KIF5B (-276033)	EPC1 (+14709)	9.8061	3.71772	6.8071	3.44634
	742	cg16900910	chr 15: 72789182	-0.0275397	0.0081839	0.772699	-2.64439	ARIH1	22516	ARIH1	Body	BBS4 (-189337)	ARIH1 (+22516)	10.8715	6.13439	8.05652	5.00812
	743	cg01084837	chr 11: 116881122	-0.0271259	0.00767265	0.765092	-2.66615	Mir_548	-58866	SIK3	Body	APOA1 (-172785)	SIK3 (+87870)	21.9031	5.1168	19.0244	4.38525
	744	cg13891121	chr 12: 26987045	0.024511	0.00375151	0.726084	2.89833	ITPR2	-914	ITPR2	TSS1500	ITPR2 (-915)		5.40993	4.30939	7.55189	3.35088
	745	cg14309469	chr 4: 40817953	0.0308116	0.0114092	0.820005	2.52991	APBB2	41219	APBB2;APBB2;APBB2;APBB2;APBB2;APBB2;APBB2	3'UTR;3'UTR;3'UTR;3'UTR;3'UTR;3'UTR;3'UTR	NSUN7 (+66040)	APBB2 (+398681)	12.1463	5.42739	14.225	5.45349
	746	cg17149019	chr 3: 62432102	0.022715	5.21114e-05	0.461884	4.04595	CADPS	35442	CADPS;CADPS;CADPS	Body;Body;Body	FEZF2 (-72913)	CADPS (+428961)	16.9061	2.51363	19.1711	2.39236
	747	cg18052274	chr 11: 19737158	0.0241202	0.00311349	0.704642	2.95631	LOC100126784	-940	LOC100126784;NAV2;NAV2;NAV2	TSS1500;Body;Body;Body	NAV2 (+2278)	DBX1 (+444711)	7.56891	3.65306	9.24225	3.8132
	748	cg08140712	chr 3: 127171033	-0.0323245	0.0121759	0.825001	-2.50701	BC015846	-61520			TPRA1 (+138534)	PLXNA1 (+463597)	12.4401	5.25325	8.85406	5.96197
	749	cg18256205	chr 5: 180648409	0.044787	0.013995	0.829102	2.45739	TRNA_Lys	642			TRIM41 (-1853)		3.15783	7.71913	6.79695	7.9919
	750	cg06168950	chr 3: 154737057	0.0300647	0.0110165	0.817474	2.54217	MME	-4855			GPR149 (-589554)	MME (-60895)	1.85511	4.61522	4.4495	5.63086
	751	cg01520447	chr 2: 106498162	-0.0248599	0.00452308	0.738708	-2.83917	NCK2	29959	NCK2;NCK2;NCK2	Body;Body;Body	C2orf40 (-183950)	NCK2 (+29959)	1.32998	4.01997	-0.258987	4.16226
	752	cg10243567	chr 1: 200332938	-0.0304241	0.0113376	0.819757	-2.53212	C1orf98	9982			ZNF281 (+46227)	FAM58BP (+150283)	12.9906	5.45331	10.085	4.49581
	753	cg12336960	chr 3: 191049285	-0.0408307	0.0139103	0.828679	-2.45957	UTS2D	-960	CCDC50;CCDC50;UTS2D	Body;Body;TSS1500	UTS2D (-961)		18.0927	6.77899	13.8961	7.51736
	754	cg05452742	chr 11: 34070756	0.025437	0.00574579	0.762074	2.76195	CAPRIN1	-2473			CAPRIN1 (-2473)		14.138	4.23243	16.4052	3.52074
	755	cg16114312	chr 17: 20832995	-0.0306687	0.0115205	0.820215	-2.5265	BC072410	-72			USP22 (+113356)	CDRT15L2 (+349959)	2.23995	5.85363	-0.886402	5.54393
	756	cg26103797	chr 13: 21717807	-0.0288396	0.0100638	0.807209	-2.57363	SAP18	3155	SAP18	Body	MRP63 (-32564)	SAP18 (+3155)	14.5676	5.4592	11.8886	5.0925
	757	cg15157241	chr 21: 44396204	0.0271413	0.00798596	0.769548	2.65266	PKNOX1	1562	PKNOX1	5'UTR	PKNOX1 (+1562)	CBS (+100267)	1.46491	4.7644	4.78284	5.11862
	758	cg11781622	chr 1: 2041072	0.025616	0.00615995	0.762346	2.73914	PRKCZ	4918	PRKCZ;PRKCZ;PRKCZ	5'UTR;Body;5'UTR	SKI (-119061)	PRKCZ (+59164)	-0.908108	4.1928	1.51201	4.14181
	759	cg18534312	chr 8: 140642584	0.0231895	0.001295	0.659486	3.21709	KCNK9	-11242	KCNK9	Body	COL22A1 (-716349)	KCNK9 (+72714)	0.126119	3.26427	2.83805	3.19727
	760	cg20122043	chr 11: 132912205	-0.025187	0.00536035	0.76104	-2.78454	OPCML	-98542	OPCML	Body	OPCML (-99169)	SPATA19 (+803186)	3.92186	4.11108	1.81927	4.32262
	761	cg03562978	chr 14: 101395514	0.023515	0.00218087	0.695074	3.06443	SNORD113	-741			DIO3 (-632173)	RTL1 (-44331)	5.55322	4.28512	6.87584	3.49771
	762	cg06626750	chr 17: 56082885	-0.0327269	0.0125969	0.825001	-2.49497	SRSF1	1822	SFRS1;SFRS1	3'UTR;Body	VEZF1 (-17271)	SRSF1 (+1821)	11.1177	5.21897	7.12442	5.9854
	763	cg17277820	chr 12: 128903403	-0.0302398	0.0114221	0.820005	-2.52951	MIR3612	124767	TMEM132C	Body	TMEM132C (+151456)	SLC15A4 (+405137)	10.0711	5.63089	6.85658	4.53472
	764	cg01064286	chr 1: 212777218	0.0320189	0.0123378	0.825001	2.50233	ATF3	-4751	ATF3	5'UTR	ATF3 (-4751)		-0.293233	5.58799	2.76659	5.58405
	765	cg27295288	chr 14: 58616337	-0.0273873	0.00850731	0.77753	-2.63124	C14orf37	2510	C14orf37	5'UTR	SLC35F4 (-283746)	C14orf37 (+2509)	12.2613	5.10351	9.22225	4.42105
	766	cg17705731	chr 13: 72695062	-0.0265843	0.00753628	0.762922	-2.67217	DACH1	-253732			DACH1 (-253733)	MZT1 (+606875)	1.62007	4.15246	-0.613776	4.63747
	767	cg26169081	chr 10: 12648338	0.0261204	0.00698687	0.762922	2.69747	MIR4480	27587	CAMK1D;CAMK1D	Body;Body	CAMK1D (+256756)	CCDC3 (+395365)	17.7178	4.13877	19.8285	4.11302
	768	cg09959931	chr 4: 671550	-0.023351	0.00180499	0.676137	-3.12057	MYL5	-160	MYL5	TSS200	ATP5I (-3424)	MYL5 (-160)	11.6212	3.21801	9.32644	3.44674
	769	cg01844274	chr 6: 152792267	-0.0338894	0.013086	0.826871	-2.48142	SYNE1	1497	SYNE1;SYNE1	Body;Body	SYNE1 (+166266)	ESR1 (+663814)	8.20224	6.2933	5.83608	6.79807
	770	cg13427189	chr 11: 10750074	-0.03352	0.012979	0.826062	-2.48435	CTR9	-22736			MRVI1 (-76227)	CTR9 (-22736)	9.98195	6.11435	6.40826	5.95
	771	cg27281690	chr 2: 7171963	0.0271265	0.00828468	0.776096	2.64024	RNF144A	98776	RNF144A	Body	RNF144A (+114441)		2.42093	4.24875	4.55863	4.63125
	772	cg21434530	chr 4: 4870486	-0.0233735	0.00190887	0.676137	-3.10406	MSX1	9095			MSX1 (+9095)	CYTL1 (+150710)	2.25633	2.96341	0.626095	3.92776
	773	cg04983296	chr 4: 79861284	0.0242272	0.00379298	0.726084	2.89488	PAQR3	-702	PAQR3	TSS1500	PAQR3 (-703)		5.62377	3.85534	7.64424	3.69845
	774	cg19838358	chr 12: 133304061	0.0275312	0.00897916	0.789172	2.61285	ANKLE2	7214	ANKLE2	Body	PGAM5 (+16669)	ANKLE2 (+34389)	1.0387	5.00561	3.50678	4.16866
	775	cg25523633	chr 20: 2637111	-0.0227406	0.000552592	0.599465	-3.45388	SNORA51	1399	SNORD57;NOP56;NOP56;SNORD56	TSS1500;Body;Body;TSS200	NOP56 (+3934)	IDH3B (+7731)	4.19675	3.46721	2.14848	2.87244
	776	cg13693517	chr 20: 13616618	0.0258443	0.00679948	0.762346	2.70651	TASP1	2965	TASP1	5'UTR	TASP1 (+2964)	ISM1 (+414201)	8.71139	5.04337	10.6901	4.61096
	777	cg01660934	chr 16: 68269041	-0.0333656	0.0132058	0.826951	-2.47817	ESRP2	1095	ESRP2	Body	ESRP2 (+1094)	NFATC3 (+149773)	9.78668	5.96001	6.06083	5.716
	778	cg09398762	chr 13: 107571965	-0.0340688	0.0134061	0.826951	-2.47279	ARGLU1	-351451			ARGLU1 (-351452)	FAM155A (+947494)	17.1268	5.81311	13.7391	6.32456
	779	cg26671988	chr 5: 102089760	0.0292587	0.0109835	0.817474	2.54322	PAM	-111766			SLCO6A1 (-255041)	PAM (-111766)	10.7081	6.20147	12.6779	6.80489
	780	cg02054252	chr 12: 50078554	0.0265637	0.00783328	0.766527	2.65917	FMNL3	22643	FMNL3;FMNL3	Body;Body	FMNL3 (+22642)	PRPF40B (+54227)	6.22111	4.59594	7.64448	5.29016
	781	cg25652751	chr 15: 77748245	-0.0256046	0.00656608	0.762346	-2.71809	AK025664	-26146	HMG20A	5'UTR	HMG20A (+35003)	LINGO1 (+176463)	12.5117	4.2822	9.58712	4.0507
	782	cg13679714	chr 17: 77706946	0.0324595	0.0128481	0.825627	2.48795	ENPP7	2065	ENPP7	Body	CBX2 (-45030)	ENPP7 (+2065)	2.0015	6.21505	4.8415	6.6207
	783	cg25991026	chr 6: 143542226	-0.0294378	0.0112094	0.818055	-2.5361	AIG1	160143	AIG1	Body	AIG1 (+160204)	ADAT2 (+229614)	3.03103	4.86954	0.481389	5.11885
	784	cg10767045	chr 10: 89264128	-0.0237308	0.00295065	0.704642	-2.97283	MINPP1	-94	MINPP1	TSS200	MINPP1 (-94)		5.60033	2.86852	2.76728	3.99651
	785	cg08977816	chr 2: 11863086	0.0233537	0.00209755	0.692428	3.07606	LPIN1	-1394			NTSR2 (-52758)	LPIN1 (-23653)	3.3817	3.24198	5.71882	3.78314
	786	cg06398474	chr 2: 240291509	0.0304703	0.0120647	0.825001	2.51025	MIR2467	-18010	HDAC4	5'UTR	HDAC4 (+31133)	TWIST2 (+534837)	17.1338	5.16317	19.9959	5.63415
	787	cg03128029	chr 2: 203143288	0.0263902	0.00769879	0.765712	2.665	SNORD70	458	NOP58	Body	BMPR2 (-97761)	NOP58 (+12774)	6.91445	5.14632	9.18715	4.2327
	788	cg21003470	chr 6: 135822381	-0.0326896	0.0130278	0.826507	-2.48301	LINC00271	2840	C6orf217	Body	AHI1 (-3479)		5.8378	5.95219	2.68878	5.11793
	789	cg06082897	chr 1: 7767716	0.0227605	0.000746731	0.617879	3.37182	CAMTA1	27569	CAMTA1	Body	VAMP3 (-63612)	CAMTA1 (+922333)	13.0947	3.31235	14.9633	3.07238
	790	cg25983531	chr 7: 36765142	-0.0246753	0.00497475	0.759539	-2.80866	AOAH	-988	AOAH	TSS1500	AOAH (-989)		17.4846	3.52001	14.2636	4.24018
	791	cg07085156	chr 10: 64959524	0.0290566	0.0109381	0.817474	2.54467	JMJD1C	-8656	JMJD1C;JMJD1C	Body;Body	NRBF2 (+66518)	JMJD1C (+266197)	12.7147	4.96496	14.8357	5.45545
	792	cg02489371	chr 17: 56496039	0.0269719	0.00840347	0.776401	2.63541	RNF43	-1108	RNF43	TSS1500	RNF43 (-1109)		1.06005	6.07697	3.96273	3.41252
	793	cg15026001	chr 15: 51395351	0.0357124	0.0139794	0.829102	2.45779	TNFAIP8L3	2122	TNFAIP8L3	Body	AP4E1 (+194483)	CYP19A1 (+235443)	2.12174	6.93979	5.75479	5.29707
	794	cg07179669	chr 1: 221054707	0.025112	0.00576922	0.762074	2.76062	HLX	1965	HLX	Body	HLX (+1965)	DUSP10 (+860808)	0.0564102	3.74686	2.64774	3.83562
	795	cg06797156	chr 8: 124173733	0.0226344	0.000490688	0.592111	3.48579	TRNA_Met	-4191			C8orf76 (+79904)	WDR67 (+88814)	13.9606	3.22154	16.3097	3.15407
	796	cg01071811	chr 20: 42143080	-0.0284891	0.0104475	0.808328	-2.56065	L3MBTL1	5	L3MBTL;L3MBTL;L3MBTL;L3MBTL	5'UTR;1stExon;1stExon;5'UTR	SGK2 (-51656)	L3MBTL1 (+6761)	5.05874	5.14983	2.12851	5.14677
	797	cg23295754	chr 20: 1639250	0.0307987	0.0123928	0.825001	2.50076	SIRPG	-825	SIRPG;SIRPG;SIRPG	TSS1500;TSS1500;TSS1500	SIRPG (-826)		3.70444	5.22643	6.10571	5.42612
	798	cg14249808	chr 9: 139128417	-0.0265164	0.00801123	0.769548	-2.6516	QSOX2	9270	QSOX2	Body	LHX3 (-33414)	QSOX2 (+9269)	1.91821	5.55408	-0.790038	4.75881
	799	cg18787437	chr 1: 16499673	-0.0245306	0.00472172	0.744434	-2.82543	EPHA2	-17091			EPHA2 (-17092)	ARHGEF19 (+39430)	10.2904	4.34275	8.86944	4.40299
	800	cg02954562	chr 12: 6649806	0.0269132	0.00844811	0.776508	2.63362	DL491527	4141	IFFO1;IFFO1;IFFO1	Body;Body;Body	GAPDH (+6150)	IFFO1 (+15442)	13.5787	4.73176	15.1818	5.00101
	801	cg14533737	chr 6: 157455836	0.0254485	0.00645566	0.762346	2.72369	ARID1B	199237	ARID1B;ARID1B;ARID1B	Body;Body;Body	TMEM242 (+289416)	ARID1B (+356773)	8.44454	3.57491	10.481	4.37938
	802	cg02567958	chr 22: 37962818	0.0241395	0.00402339	0.726995	2.87632	CDC42EP1	6348	CDC42EP1	Body	CDC42EP1 (+6348)	LGALS2 (+13205)	12.773	3.85899	15.0781	3.56657
	803	cg07670722	chr 7: 103210555	-0.025216	0.00607132	0.762346	-2.7439	7SK	-85569	RELN;RELN	Body;Body	SLC26A5 (-123932)	RELN (+419407)	7.08421	4.42589	4.401	4.39849
	804	cg17833419	chr 1: 19392447	-0.0230344	0.00156954	0.676137	-3.16151	AX747516	9558			ALDH4A1 (-163155)	UBR4 (+144298)	11.7983	3.28107	9.98557	4.14407
	805	cg04904469	chr 8: 38845670	0.0258578	0.00709859	0.762922	2.69218	TM2D2	8371	HTRA4	3'UTR	TM2D2 (+8370)	HTRA4 (+14003)	13.081	4.76529	15.6544	3.7506
	806	cg15181351	chr 6: 13350865	0.0224529	0.000164929	0.461884	3.76744	AK127555	10329			TBC1D7 (-22079)	GFOD1 (+137003)	3.87964	3.4178	5.87825	3.50715
	807	cg07998325	chr 19: 13347125	-0.0260629	0.0073921	0.762922	-2.67864	CACNA1A	21240	CACNA1A;CACNA1A	Body;Body	IER2 (+85844)	CACNA1A (+270148)	2.16115	4.46088	-0.153068	4.03539
	808	cg20844427	chr 13: 106470099	0.0248154	0.00542681	0.76104	2.78054	AK058053	110882			DAOA (+351535)	EFNB2 (+717288)	-0.0779338	3.73472	1.87627	4.03501
	809	cg04475193	chr 5: 132303723	0.0269854	0.00875482	0.783717	2.62148	AFF4	-4369			AFF4 (-4370)		3.03476	5.3691	5.67045	4.24614
	810	cg19931596	chr 2: 172645256	-0.0236498	0.00305914	0.704642	-2.96173	DYNC1I2	62189	SLC25A12	Body	DYNC1I2 (+101275)	SLC25A12 (+105556)	6.57265	3.38251	4.79087	3.60209
	811	cg02277868	chr 5: 137222136	0.0356725	0.0142984	0.831245	2.44968	PKD2L2	-2988	MYOT;MYOT	Body;Body	PKD2L2 (-2988)		10.6932	6.01671	14.3173	6.37407
	812	cg12493494	chr 11: 118885541	-0.0245766	0.00511099	0.76104	-2.79995	RPS25	3516	CCDC84	Body	TRAPPC4 (-3699)	RPS25 (+3515)	12.2858	4.49962	9.8113	4.23679
	813	cg01865066	chr 16: 1178445	0.0243375	0.00452169	0.738708	2.83927	CACNA1H	-24795			C1QTNF8 (-32202)	CACNA1H (-24795)	3.02974	3.18512	4.79923	4.67669
	814	cg10465202	chr 12: 8766467	0.0231833	0.0020215	0.686352	3.08706	AICDA	-1025	AICDA	TSS1500	AICDA (-1026)		0.57725	3.23233	3.08056	3.41586
	815	cg07299144	chr 16: 3105939	-0.0250388	0.00592387	0.762346	-2.75197	BC045731	3397	MMP25	Body	IL32 (-9373)	MMP25 (+9258)	3.3835	4.15163	0.794925	3.51016
	816	cg13481271	chr 9: 127661777	-0.0231972	0.00208995	0.691196	-3.07714	GOLGA1	28787	GOLGA1	Body	ARPC5L (+30294)	GOLGA1 (+41608)	4.63025	3.50543	2.39747	3.34443
	817	cg03989273	chr 5: 133468435	-0.029353	0.0115369	0.820215	-2.526	TCF7	-8719	TCF7;TCF7;TCF7;TCF7;TCF7;TCF7;TCF7	Body;Body;Body;Body;Body;Body;Body	TCF7 (+18034)	SKP1 (+44288)	2.66864	5.54027	0.114851	5.18367
	818	cg24146090	chr 9: 71939349	0.0242218	0.00434761	0.733186	2.85177	FAM189A2	-138	FAM189A2	TSS200	FAM189A2 (-138)		1.67592	3.52182	3.42955	4.0123
	819	cg21638035	chr 2: 241570135	-0.0224347	0.000226337	0.480574	-3.68765	GPR35	766	GPR35	1stExon	GPR35 (+5474)	AQP12B (+52181)	2.41242	2.92075	0.51901	2.81265
	820	cg02436141	chr 6: 88854153	-0.0225146	0.000462531	0.590112	-3.50157	CNR1	840	CNR1;CNR1;CNR1;CNR1;CNR1;CNR1	Body;Body;Body;Body;Body;Body	CNR1 (+21613)	SPACA1 (+96647)	4.22111	2.45372	2.07852	3.0587
	821	cg24581200	chr 11: 384176	-0.0227995	0.00121849	0.649585	-3.23452	PKP3	-8422			PKP3 (-10040)	B4GALNT4 (+14382)	4.68806	3.38084	2.52402	3.69776
	822	cg01952618	chr 5: 126984145	0.0322595	0.0133266	0.826951	2.47492	CTXN3	-567	CTXN3	TSS1500	CTXN3 (-4561)		0.895496	6.57462	4.17342	4.49932
	823	cg21946195	chr 2: 86012225	0.0273106	0.00947181	0.798324	2.59454	LOC284950	-30027	ATOH8	Body	ATOH8 (+31317)	ST3GAL5 (+103931)	7.12486	5.23032	9.30891	5.15679
	824	cg17890940	chr 7: 1782346	-0.0329356	0.0136322	0.826951	-2.46681	ELFN1	33549	ELFN1	5'UTR	ELFN1 (+33549)	MAD1L1 (+490236)	8.1415	5.41222	4.81013	5.73379
	825	cg07109965	chr 6: 16401143	-0.0245222	0.00515007	0.76104	-2.79749	GMPR	162333	ATXN1;ATXN1	5'UTR;5'UTR	GMPR (+162333)	ATXN1 (+360577)	10.4426	3.29949	7.34481	4.16768
	826	cg08643692	chr 17: 43099350	-0.0310795	0.012873	0.825627	-2.48726	DCAKD	13159			C1QL1 (-53707)	DCAKD (+29627)	5.73445	6.38191	2.12856	4.46079
	827	cg17867471	chr 13: 32984496	-0.0306259	0.0127213	0.825001	-2.49148	SNORA16	10157	N4BP2L1;N4BP2L1	Body;Body	N4BP2L1 (+17818)	BRCA2 (+94880)	7.21658	5.53721	3.05304	5.99762
	828	cg24839145	chr 8: 5028854	-0.0383339	0.014951	0.832281	-2.43356	CSMD1	-176526			CSMD1 (-176527)		10.4775	6.74004	6.27067	6.5717
	829	cg00428692	chr 5: 194530	0.0262034	0.00803856	0.769548	2.65045	LRRC14B	2905	LRRC14B	Body	SDHA (-23825)	PLEKHG4B (+54158)	-0.465174	4.44945	1.95566	3.76414
	830	cg25773489	chr 19: 271202	-0.0224644	0.000485555	0.591773	-3.4886	PPAP2C	19967			PPAP2C (+19966)	OR4F17 (+160524)	3.87515	2.90815	1.77569	2.77107
	831	cg03540622	chr 3: 42706066	-0.0233811	0.00271199	0.695074	-2.99863	ZBTB47	10891	ZBTB47	Body	ZBTB47 (+10891)	HHATL (+38252)	12.9275	3.44871	10.5975	4.18797
	832	cg23530268	chr 17: 74925720	-0.0267032	0.00874054	0.782839	-2.62204	MGAT5B	-16611	MGAT5B;MGAT5B	Body;Body	SEC14L1 (-211284)	MGAT5B (+60923)	2.05806	4.53476	-1.34103	4.47529
	833	cg07777347	chr 3: 194361833	-0.0287442	0.0112656	0.818055	-2.53435	TMEM44	-7415	LSG1	3'UTR	TMEM44 (-7684)	LSG1 (+31372)	24.7947	5.29388	20.7137	5.73715
	834	cg00306578	chr 16: 71570932	-0.0230731	0.00197303	0.679627	-3.09426	CHST4	352	CHST4;CHST4	Body;Body	CHST4 (+10779)	TAT (+40065)	4.17279	3.35357	1.96882	3.14397
	835	cg22703515	chr 1: 240070286	-0.029928	0.0123352	0.825001	-2.50241	CHRM3	-465	CHRM3	5'UTR	FMN2 (-184898)	CHRM3 (+277914)	3.04982	5.73737	0.557967	4.81694
	836	cg26884161	chr 1: 151303917	-0.0344097	0.0142696	0.831245	-2.4504	PI4KB	-3726			PI4KB (-3727)		10.6292	5.93023	7.05403	7.00523
	837	cg19741777	chr 19: 48965833	-0.0223224	0.000174561	0.461884	-3.75324	KCNJ14	1328	KCNJ14;KCNJ14	Body;Body	CYTH2 (-6631)	KCNJ14 (+7068)	10.9556	2.98603	8.75675	2.66311
	838	cg18455364	chr 14: 100749461	-0.022839	0.00155482	0.676137	-3.16425	BC014138	2713			SLC25A29 (+23398)	YY1 (+44360)	11.5119	3.24932	9.30606	3.14684
	839	cg13728394	chr 3: 44115791	0.0227218	0.00119772	0.649585	3.23942	MIR138-1	-39912			C3orf23 (-264152)	ABHD5 (+383417)	10.3351	4.21506	12.4212	3.17728
	840	cg04422625	chr 8: 125053833	0.0239623	0.00410601	0.726995	2.8699	FER1L6-AS1	-810	FER1L6	Body	FER1L6 (+189607)	TMEM65 (+331106)	7.86739	3.77234	10.0678	3.33137
	841	cg07870879	chr 7: 1365868	0.0262504	0.00822607	0.774027	2.64265	UNCX	93215			UNCX (+93215)	MICALL2 (+133240)	6.30216	4.49803	8.87855	4.38298
	842	cg16568467	chr 4: 88733182	0.0324634	0.0136995	0.826951	2.46505	MEPE	-9380	IBSP	3'UTR	MEPE (-20938)	IBSP (+12481)	4.36203	6.15969	8.1844	5.85143
	843	cg23527902	chr 17: 61515708	0.0225579	0.000847725	0.617879	3.33672	CYB561	-177	CYB561;CYB561;CYB561	5'UTR;5'UTR;5'UTR	CYB561 (+7836)	TANC2 (+428811)	3.31001	2.48157	5.18164	3.45433
	844	cg13235098	chr 4: 123090679	0.0290108	0.0116893	0.821613	2.52139	KIAA1109	-1078	KIAA1109	TSS1500	KIAA1109 (-1078)		17.4816	6.58218	20.2279	5.00691
	845	cg26754071	chr 7: 35738132	0.0279103	0.0105489	0.810298	2.5573	DQ594967	3285			HERPUD2 (-3361)		9.78261	5.36719	12.8378	4.68262
	846	cg17011799	chr 14: 23751452	-0.0356911	0.0147894	0.831245	-2.4375	HOMEZ	3857	HOMEZ	Body	SLC7A8 (-98604)	HOMEZ (+3856)	13.8592	6.45781	10.1467	6.34209
	847	cg04939900	chr 16: 48411586	0.022751	0.00139395	0.668275	3.1959	SIAH1	7643	SIAH1	5'UTR	SIAH1 (+7642)	LONP2 (+133376)	7.65755	2.82717	9.92771	3.49756
	848	cg02127509	chr 6: 135516936	-0.030098	0.0126313	0.825001	-2.494	MYB	51	MYB;MYB;MYB;MYB;MYB;MYB;MYB;MYB	Body;Body;Body;Body;Body;Body;Body;Body	MYB (+14484)	AHI1 (+301966)	3.77504	6.1022	1.07689	5.33827
	849	cg13934924	chr 15: 101937424	0.0296637	0.0123685	0.825001	2.50145	PCSK6	46441	PCSK6;PCSK6;PCSK6;PCSK6;PCSK6;PCSK6;PCSK6;PCSK6	Body;Body;Body;Body;Body;Body;Body;Body	SNRPA1 (-101965)	PCSK6 (+92762)	0.692456	5.53483	3.2079	4.54778
	850	cg04884313	chr 14: 102504909	-0.0243333	0.00507095	0.76104	-2.80249	DYNC1H1	23468	DYNC1H1	Body	DYNC1H1 (+74045)	HSP90AA1 (+101176)	1.73664	4.12966	-0.498819	3.35731
	851	cg08081323	chr 11: 57232407	-0.0266562	0.00901246	0.789723	-2.61158	RTN4RL2	4069	RTN4RL2	Body	RTN4RL2 (+4069)	SLC43A1 (+49950)	5.37403	5.02874	2.02895	4.82957
	852	cg09459339	chr 3: 111260893	0.034001	0.0143768	0.831245	2.44771	CD96	-32	CD96;CD96	TSS200;TSS200	CD96 (-32)		6.07621	6.06783	8.7303	6.3857
	853	cg00238543	chr 20: 56246759	-0.0244179	0.00528631	0.76104	-2.78905	PMEPA1	38272	PMEPA1;PMEPA1;PMEPA1;PMEPA1	5'UTR;5'UTR;Body;Body	ZBP1 (-51128)	PMEPA1 (+38271)	15.3292	4.11527	12.8472	3.79124
	854	cg01370805	chr 22: 51111217	0.0224681	0.000748769	0.617879	3.37107	SHANK3	-1852			SHANK3 (-1852)		19.431	3.41725	21.063	3.31952
	855	cg08190562	chr 6: 29528774	0.0276455	0.0103408	0.807209	2.56422	UBD	-1072	UBD	TSS1500	UBD (-1073)		0.668902	5.81179	3.98071	4.74866
	856	cg12601856	chr 6: 158734085	0.02323	0.00265103	0.695074	3.00555	TULP4	394	TULP4;TULP4;TULP4;TULP4	1stExon;5'UTR;5'UTR;1stExon	TULP4 (+394)		3.13851	3.55808	5.01169	3.30939
	857	cg10167463	chr 7: 75959203	-0.0271971	0.00975845	0.801903	-2.58427	AX747594	23595	YWHAG	Body	HSPB1 (+27329)	YWHAG (+29138)	13.9428	5.03908	11.5472	5.15487
	858	cg13345726	chr 17: 66708409	-0.0273232	0.00998926	0.805593	-2.5762	FAM20A	-111314			FAM20A (-111315)	ABCA8 (+243123)	9.44444	4.01579	7.11949	4.92157
	859	cg17078656	chr 1: 12535113	0.0226019	0.00105405	0.617879	3.27569	SNORA59B	-32186	VPS13D;VPS13D	Body;Body	DHRS3 (+142706)	VPS13D (+245001)	13.0456	3.26754	15.6176	3.08383
	860	cg22125989	chr 11: 125744082	-0.0275894	0.0103423	0.807209	-2.56417	HYLS1	-9426			HYLS1 (-9426)	PATE4 (+40872)	4.39617	4.4903	1.99683	5.25128
	861	cg23447239	chr 7: 157697628	-0.0283372	0.0113426	0.819769	-2.53196	LOC100506585	50352	PTPRN2;PTPRN2;PTPRN2	Body;Body;Body	DNAJB6 (+567919)	PTPRN2 (+682853)	5.53518	5.23175	2.50206	4.97151
	862	cg17093684	chr 7: 4838902	0.0344872	0.0147219	0.831245	2.43915	RADIL	4797	RADIL	3'UTR	KIAA0415 (+23641)	PAPOLB (+62722)	1.98515	6.63223	4.82636	6.48954
	863	cg10360323	chr 17: 41437877	-0.0268792	0.00946475	0.798324	-2.59479	LOC100130581	28389			ARL4D (-38475)	TMEM106A (+73984)	6.41301	5.10766	3.34452	4.66707
	864	cg05330497	chr 16: 58147704	0.0229335	0.0020389	0.686846	3.08451	C16orf80	15592	C16orf80	3'UTR	C16orf80 (+15591)	MMP15 (+88423)	5.74597	3.52993	7.50913	3.72307
	865	cg25020678	chr 10: 682841	0.0343504	0.0147035	0.831245	2.4396	DL489896	4901	DIP2C	Body	DIP2C (+52766)	ZMYND11 (+456908)	19.3893	6.42851	22.3969	5.25389
	866	cg02365754	chr 4: 140738168	-0.023304	0.00287989	0.701668	-2.98028	7SK	-22581	MAML3	Body	MGST2 (+151247)	MAML3 (+337064)	11.4673	3.57728	8.91685	3.4615
	867	cg05380130	chr 3: 185661662	0.0224643	0.000867076	0.617879	3.33044	TRA2B	-5738			TRA2B (-5739)	ETV5 (+165238)	7.69582	2.64555	9.8895	3.00147
	868	cg00399059	chr 8: 143859774	-0.0290502	0.0120698	0.825001	-2.5101	LYNX1	-134	LYNX1;LYNX1;LYNX1;LYNX1	TSS200;TSS1500;TSS200;TSS1500	LYNX1 (-8529)	LY6D (+8233)	14.4008	5.92858	10.6525	5.88338
	869	cg18070504	chr 3: 11187858	-0.0301028	0.0128699	0.825627	-2.48735	HRH1	-8355	HRH1	5'UTR	HRH1 (-8355)	SLC6A1 (+153439)	11.1569	5.27585	8.43476	5.43572
	870	cg03853945	chr 13: 84024017	0.0332709	0.0143799	0.831245	2.44763	SLITRK1	432511			SLITRK1 (+432510)		1.39053	5.70198	4.7926	5.38644
	871	cg00850538	chr 2: 36582038	-0.0231246	0.00257022	0.695074	-3.01495	LOC100288911	675	CRIM1	TSS1500	CRIM1 (-1331)		2.33589	4.06898	-0.641194	3.75873
	872	cg05640416	chr 10: 135176430	-0.0243996	0.00543776	0.76104	-2.77989	C10orf125	-4901	ECHS1	Body	C10orf125 (-4902)		15.5711	4.47527	13.6034	3.78403
	873	cg15787807	chr 11: 64509091	-0.0351092	0.0149705	0.832281	-2.43309	RASGRP2	-118	RASGRP2;RASGRP2;RASGRP2	Body;Body;Body	NRXN2 (-18432)	RASGRP2 (+3237)	17.5379	5.69255	13.3251	6.57705
	874	cg03348466	chr 15: 91104770	0.0252817	0.00708203	0.762922	2.69296	CRTC3	31573	CRTC3;CRTC3	Body;Body	BLM (-155808)	CRTC3 (+31573)	13.8334	3.4919	16.1896	4.27234
	875	cg20558160	chr 5: 1466242	-0.0236922	0.00398345	0.726509	-2.87947	LPCAT1	1198	LPCAT1	Body	SLC6A3 (-20700)	LPCAT1 (+57833)	8.59506	3.48662	6.69872	4.15166
	876	cg15248035	chr 9: 36169949	-0.024072	0.00492798	0.75835	-2.8117	CCIN	561	CCIN	1stExon	CCIN (+561)		4.90257	3.72888	2.64377	3.83214
	877	cg07572052	chr 1: 149821168	0.0285183	0.0116808	0.821613	2.52164	HIST2H2BC	1172	HIST2H2AA4;HIST2H2AA3	TSS1500;TSS1500	HIST2H3C (-3012)	HIST2H2AA3 (-1459)	10.7613	5.40057	13.2631	5.14803
	878	cg03708188	chr 5: 114514097	-0.0233605	0.00317903	0.704642	-2.94987	TRIM36	2146	TRIM36;TRIM36;TRIM36	Body;Body;Body	TRIM36 (+2145)	KCNN2 (+816082)	2.66839	4.02907	0.385588	3.081
	879	cg23713998	chr 14: 30375102	0.0251766	0.00690106	0.762922	2.70158	PRKD1	21797	PRKD1	Body	PRKD1 (+21796)		2.9447	4.18406	5.26268	3.92076
	880	cg07497941	chr 11: 1258546	-0.0238758	0.0044407	0.738708	-2.84503	MUC5B	14252	MUC5B	Body	MUC5B (+14252)	TOLLIP (+72345)	4.35763	3.76999	2.41665	4.52076
	881	cg14702390	chr 18: 9917748	-0.0262445	0.00886087	0.787098	-2.61738	VAPA	3794	VAPA;VAPA	Body;Body	APCDD1 (-536876)	VAPA (+3794)	16.4003	3.84772	12.8454	5.15417
	882	cg03131829	chr 17: 1028765	-0.0238909	0.004482	0.738708	-2.84208	ABR	325	ABR;ABR	Body;5'UTR	ABR (+54365)	TIMM22 (+128409)	2.66418	3.15708	-0.102799	4.41646
	883	cg27402999	chr 3: 142985221	0.0337042	0.0146903	0.831245	2.43993	Mir_544	100738	SLC9A9	3'UTR	CHST2 (+146604)	SLC9A9 (+582151)	3.31142	5.25425	6.18581	6.43117
	884	cg00976328	chr 2: 208689522	0.0222469	0.0004565	0.590112	3.50506	FZD5	-55379	PLEKHM3	3'UTR	FZD5 (-55380)	PLEKHM3 (+200761)	0.436487	2.81956	2.49456	2.69279
	885	cg21519872	chr 17: 76171657	-0.0281866	0.0114176	0.820005	-2.52965	SYNGR2	6987	TK1	Body	SYNGR2 (+6987)	TK1 (+11627)	20.4517	4.98923	16.4191	5.84512
	886	cg00014104	chr 22: 22220367	-0.0229222	0.00220742	0.695074	-3.06081	MAPK1	1603	MAPK1;MAPK1	Body;Body	YPEL1 (-130297)	MAPK1 (+1602)	2.98717	3.14224	0.287028	3.711
	887	cg11412703	chr 6: 44629403	-0.0293898	0.0125071	0.825001	-2.49751	BX647715	-69451			RUNX2 (-666650)	CDC5L (+274153)	3.38728	5.96076	1.3303	4.9377
	888	cg25363559	chr 8: 143086065	0.0228364	0.00201092	0.68406	3.08862	MIR4472-1	-171634			FLJ43860 (-568736)	TSNARE1 (+398477)	2.97256	3.28324	4.96448	3.57593
	889	cg17441062	chr 11: 88242604	-0.0237042	0.0041101	0.726995	-2.86959	BC038205	85056	GRM5;GRM5	Body;Body	CTSC (-171664)	GRM5 (+538635)	8.54402	3.9773	6.91611	3.73823
	890	cg01916685	chr 22: 42897250	-0.0226504	0.0016226	0.676137	-3.15181	SERHL	666	SERHL	Body	NFAM1 (-68850)	RRP7A (+18578)	8.7643	3.49305	6.38971	3.28077
	891	cg27126225	chr 11: 8101793	0.0318919	0.0139838	0.829102	2.45768	TUB	-1115	TUB;TUB	TSS1500;Body	TUB (+41614)	RIC3 (+88796)	3.04691	7.54191	4.42004	7.76955
	892	cg08241610	chr 2: 47848563	0.0234732	0.00368316	0.72595	2.9041	KCNK12	-51093			MSH6 (-161657)	KCNK12 (-51094)	7.84184	4.34584	9.35486	4.39766
	893	cg12968598	chr 6: 47444699	-0.0343997	0.0150198	0.832281	-2.4319	CD2AP	-825	CD2AP	TSS1500	CD2AP (-825)		9.02769	6.38983	5.92967	5.6165
	894	cg16438069	chr 9: 4488463	0.0335392	0.0147737	0.831245	2.43788	SLC1A1	-1963			SLC1A1 (-1963)		7.2873	6.73296	9.91667	6.34541
	895	cg17922695	chr 17: 75451809	0.0276418	0.0108823	0.816879	2.54646	41161	1735	SEPT9;SEPT9;SEPT9;SEPT9;SEPT9;SEPT9	Body;5'UTR;Body;Body;Body;Body	TNRC6C (-548508)	SEPT9 (+174318)	-0.25966	4.92408	1.31022	5.96799
	896	cg01184539	chr 6: 116848950	0.0253679	0.00741302	0.762922	2.6777	FAM26D	-1244	FAM26D;BET3L	TSS1500;Body	FAM26D (-1244)		1.82712	4.10718	4.55846	4.71835
	897	cg20137415	chr 10: 133945044	0.0302859	0.0133761	0.826951	2.4736	JAKMIP3	-12175	JAKMIP3	Body	DPYSL4 (-55369)	JAKMIP3 (+26732)	4.29474	4.07788	6.18602	6.42488
	898	cg02092589	chr 6: 160498383	0.036888	0.0156975	0.832281	2.41587	LOC729603	-15730	IGF2R	Body	SLC22A1 (-44479)	IGF2R (+108253)	3.04174	6.90745	6.85476	6.59759
	899	cg02059176	chr 2: 44327637	-0.0315805	0.0139781	0.829102	-2.45783	PPM1B	-68362			LRPPRC (-104494)	PPM1B (-68362)	18.0876	5.99678	15.1659	5.11669
	900	cg19768079	chr 14: 78639736	-0.0291535	0.0125099	0.825001	-2.49742	NRXN3	2809			NRXN3 (-230356)	ADCK1 (+373311)	1.81339	5.69142	-0.616465	5.17978
	901	cg18446641	chr 6: 113198826	-0.0301576	0.0133419	0.826951	-2.47451	RFPL4B	527916			MARCKS (-979700)	RFPL4B (+530295)	11.6746	4.66537	8.10817	5.51461
	902	cg23463786	chr 17: 78773145	0.0266292	0.00966805	0.799239	2.58748	RPTOR	-150090	RPTOR;RPTOR	Body;Body	CHMP6 (-192495)	RPTOR (+254521)	4.21494	4.30923	6.95568	4.74501
	903	cg18302899	chr 19: 2038600	-0.0240454	0.00515076	0.76104	-2.79745	AK097012	855	MKNK2;MKNK2	Body;3'UTR	BTBD2 (-22899)	MKNK2 (+12642)	2.32108	3.83979	-0.223844	3.30699
	904	cg00499707	chr 20: 34679665	-0.0225635	0.00152077	0.676137	-3.17069	EPB41L1	240			SCAND1 (-137118)	EPB41L1 (-62996)	5.64135	2.49241	3.57021	3.4002
	905	cg06617449	chr 11: 16763554	-0.0262085	0.00914716	0.79301	-2.6065	SOX6	-3364	C11orf58;C11orf58	Body;5'UTR	C11orf58 (+3407)	PLEKHA7 (+272408)	20.8987	4.11039	18.0711	4.26787
	906	cg15810253	chr 22: 50307965	-0.0224037	0.00104369	0.617879	-3.27848	ALG12	4141	ALG12	5'UTR	CRELD2 (-4317)	ALG12 (+4140)	20.0284	3.17171	17.655	3.32771
	907	cg04718987	chr 4: 185355309	-0.0227387	0.00195503	0.679283	-3.09698	IRF2	40417	IRF2	5'UTR	ENPP6 (-216196)	IRF2 (+40416)	11.0228	3.32765	8.65236	3.57233
	908	cg01566170	chr 1: 223899746	-0.0350205	0.0153619	0.832281	-2.42373	CAPN2	-372	CAPN2;CAPN2	TSS1500;Body	CAPN2 (-372)		13.5173	6.96317	10.0463	6.08057
	909	cg02647265	chr 12: 124456164	-0.027589	0.0109911	0.817474	-2.54298	CCDC92	999	CCDC92	5'UTR	ZNF664 (-1597)		7.47057	4.77467	4.42135	4.52205
	910	cg01880929	chr 2: 36614588	0.0255327	0.00786688	0.767636	2.65773	CRIM1	31219	CRIM1	Body	CRIM1 (+31219)	FEZ2 (+210743)	10.5227	4.53548	12.9415	4.1144
	911	cg20212077	chr 13: 68194226	0.0282757	0.0118146	0.823038	2.51763	PCDH9	-389758			PCDH9 (-389759)		4.17225	4.18053	6.99407	5.31652
	912	cg19619416	chr 1: 1992232	-0.0244261	0.00592593	0.762346	-2.75185	PRKCZ	10324	PRKCZ	Body	SKI (-167901)	PRKCZ (+10324)	2.47868	4.38233	0.226074	3.5653
	913	cg21105620	chr 4: 3449856	-0.0228548	0.00239012	0.695074	-3.03692	HGFAC	6131	HGFAC	Body	DOK7 (-15176)	HGFAC (+6131)	6.27025	3.77711	4.1935	4.56212
	914	cg17721879	chr 5: 158532473	0.0232115	0.00318801	0.704642	2.949	AK123543	4784			EBF1 (-5686)	RNF145 (+102360)	0.509247	3.81	2.20431	3.61005
	915	cg11661265	chr 4: 36068080	-0.0294637	0.0128924	0.825627	-2.48673	ARAP2	7377	ARAP2	3'UTR	ARAP2 (+177898)		15.068	6.83354	12.0363	6.55661
	916	cg13202952	chr 8: 21888398	-0.0286991	0.0123625	0.825001	-2.50162	NPM2	6045	NPM2	Body	FGF17 (-12029)	NPM2 (+6045)	3.617	4.52975	0.946839	5.49956
	917	cg07840541	chr 1: 213626018	0.0236293	0.0042538	0.731174	2.8587	RPS6KC1	379807			PROX1 (-535841)	RPS6KC1 (+401431)	1.19778	2.937	3.30906	4.11239
	918	cg22138597	chr 11: 82396872	0.0246667	0.00646087	0.762346	2.72343	FAM181B	48034			PRCP (+214684)		6.42422	4.0776	8.44197	4.08687
	919	cg26831149	chr 22: 46263661	0.027995	0.0116279	0.821415	2.52324	WNT7B	104583			WNT7B (+109346)	ATXN10 (+195984)	5.08622	6.14017	6.86869	4.87128
	920	cg11961401	chr 22: 18511180	-0.0283695	0.0121106	0.825001	-2.50891	FLJ41941	-970	FLJ41941	TSS1500	MICAL3 (-3856)		7.75363	4.72542	4.73932	4.76972
	921	cg25495650	chr 7: 633202	0.0312231	0.0141146	0.829959	2.45433	PRKAR1B	8019	PRKAR1B;PRKAR1B;PRKAR1B;PRKAR1B;PRKAR1B;PRKAR1B	Body;Body;Body;Body;Body;Body	HEATR2 (-133135)	PDGFA (-73722)	5.96586	5.25413	8.19512	6.14397
	922	cg16564132	chr 7: 47193871	0.0232688	0.00347507	0.715914	2.92226	AK310472	123505			TNS3 (+427870)		8.50055	3.518	10.6781	3.17237
	923	cg03459617	chr 4: 88528262	0.0263432	0.00961818	0.799239	2.58926	DSPP	-1418	DSPP	TSS1500	DSPP (-1418)		-0.383201	4.95727	2.31036	4.58985
	924	cg19501190	chr 11: 73021274	0.0352751	0.0156579	0.832281	2.41679	ARHGEF17	1612	ARHGEF17	1stExon	RELT (-66130)	ARHGEF17 (+1612)	7.94784	6.07722	10.9681	7.11995
	925	cg02185248	chr 17: 78748494	0.0349076	0.0155695	0.832281	2.41885	RPTOR	-174741	RPTOR;RPTOR	Body;Body	CHMP6 (-217146)	RPTOR (+229870)	13.4429	6.67581	16.1763	5.94033
	926	cg14065224	chr 2: 98828226	-0.0255483	0.00813169	0.772699	-2.64655	VWA3B	-166	VWA3B	Body	TMEM131 (-215873)	CNGA3 (-134391)	4.16594	4.37774	2.00599	4.47146
	927	cg01223011	chr 3: 128714144	-0.0229961	0.00280321	0.695074	-2.98853	KIAA1257	-1158	KIAA1257	TSS1500	GP9 (-65500)	ACAD9 (+115812)	8.1258	3.81611	6.11956	4.00547
	928	cg10777461	chr 1: 10590481	0.0296309	0.0132519	0.826951	2.47693	PEX14	2170	PEX14	Body	PEX14 (+55479)	CASZ1 (+266225)	4.41977	4.98753	6.98799	5.15877
	929	cg21845633	chr 17: 7758204	-0.0312943	0.0142833	0.831245	-2.45006	TMEM88	-179	TMEM88	TSS200	CYB5D1 (-2859)	TMEM88 (-179)	4.42249	6.08919	0.933436	6.06212
	930	cg23937633	chr 5: 142252159	-0.022377	0.00128118	0.659486	-3.22016	BC039527	-3684	ARHGAP26;ARHGAP26	Body;Body	ARHGAP26 (+101868)	NR3C1 (+531885)	8.48749	3.27044	6.63428	3.26869
	931	cg04695077	chr 11: 33850394	0.029362	0.0130412	0.826507	2.48264	LMO2	36303			FBXO3 (-54324)	LMO2 (+63441)	5.92852	5.47389	8.18015	5.0283
	932	cg08419879	chr 6: 151152916	-0.0233121	0.00367084	0.724397	-2.90514	MTHFD1L	-33898	PLEKHG1	Body	MTHFD1L (-33898)	PLEKHG1 (+231918)	3.84545	3.83218	1.54625	3.82499
	933	cg12114888	chr 8: 107738435	-0.0365993	0.0160084	0.832281	-2.40872	OXR1	101	OXR1;OXR1	Body;Body	ABRA (+44036)	OXR1 (+278284)	3.22164	4.68946	-0.566302	7.53815
	934	cg17943647	chr 4: 154125374	-0.0272099	0.0108213	0.815668	-2.54842	TRIM2	-223	TRIM2;TRIM2	TSS1500;5'UTR	TRIM2 (-223)		2.08299	4.99466	-0.508392	5.00685
	935	cg05888037	chr 13: 31506270	-0.0254687	0.00809529	0.772699	-2.64807	LOC100507064	475	C13orf26	TSS1500	ALOX5AP (+218656)	HSPH1 (+229846)	11.8931	4.3176	9.2422	3.81407
	936	cg06036239	chr 1: 59234929	-0.024539	0.0064065	0.762346	-2.72622	JUN	14856			MYSM1 (-69183)	JUN (+14855)	6.33184	4.17428	3.18598	3.93531
	937	cg00262132	chr 4: 113430381	-0.0356323	0.0158486	0.832281	-2.41238	NEUROG2	6250			NEUROG2 (+6946)	ALPK1 (+211883)	5.62246	6.70681	2.6725	6.66912
	938	cg23251701	chr 5: 2537228	0.027349	0.0110908	0.817984	2.53982	IRX2	214541			IRX4 (-654349)	IRX2 (+214540)	3.72478	5.36105	5.22557	5.55115
	939	cg14849228	chr 5: 5489946	-0.0254264	0.00801445	0.769548	-2.65146	KIAA0947	67140	KIAA0947	3'UTR	ADAMTS16 (+349504)	MED10 (+888692)	4.39616	4.5755	1.9926	4.23902
	940	cg12854186	chr 6: 32805398	0.0229637	0.00283756	0.69706	2.98481	TAP2	643	TAP2;TAP2	Body;Body	HLA-DQB2 (-74069)	TAP2 (+1148)	10.1709	3.6394	12.4419	3.34886
	941	cg22931795	chr 3: 54851924	0.0297001	0.0135111	0.826951	2.47001	AK092143	83358	CACNA2D3	Body	LRTM1 (+110147)	CACNA2D3 (+695232)	3.61666	4.66279	6.76465	5.53204
	942	cg19631876	chr 12: 117901264	-0.0221818	0.000840763	0.617879	-3.33901	NOS1	-101657	KSR2	3'UTR	NOS1 (-101658)	KSR2 (+504763)	6.08581	3.38751	3.88685	2.92525
	943	cg03542374	chr 15: 93448465	-0.0252411	0.00770896	0.765712	-2.66456	CHD2	763	CHD2;CHD2	Body;Body	CHD2 (+4915)	RGMA (+168750)	7.8277	4.51164	5.53958	4.56752
	944	cg24862410	chr 4: 53817129	0.0253295	0.00789499	0.76796	2.65653	AK055055	5309	SCFD2	Body	RASL11B (+88635)	SCFD2 (+415112)	0.325375	4.39347	2.60398	4.51496
	945	cg11245990	chr 11: 68621969	0.0222412	0.00101351	0.617879	3.28675	CPT1A	-12570			CPT1A (-12571)	MRPL21 (+49333)	0.702999	3.19734	3.18991	2.91561
	946	cg27507713	chr 20: 60587265	-0.0225657	0.0019018	0.676137	-3.10515	TAF4	53601	TAF4	Body	TAF4 (+53600)	CDH4 (+759784)	4.60966	3.53006	2.86147	3.54105
	947	cg27588515	chr 5: 115167455	0.0243991	0.00628763	0.762346	2.73239	ATG12	10093	ATG12	3'UTR	CDO1 (-15051)	ATG12 (+10092)	11.5816	4.22439	13.239	4.2658
	948	cg12279397	chr 10: 4782836	0.0268487	0.0105213	0.809872	2.55821	LOC100216001	-62574			KLF6 (-955364)	AKR1E2 (-85565)	7.53698	4.2911	10.1337	5.3556
	949	cg03398383	chr 2: 172941943	-0.0231853	0.00359329	0.720253	-2.91182	DLX1	-8264	MAP1D	Body	DLX1 (-8264)	METAP1D (+77140)	6.40744	3.53579	4.02603	3.31886
	950	cg03582215	chr 22: 39499750	-0.0252945	0.00796086	0.769548	-2.65373	APOBEC3H	6522	APOBEC3H;APOBEC3H;APOBEC3H	3'UTR;3'UTR;3'UTR	APOBEC3H (+6522)	CBX7 (+48787)	3.60603	5.07692	1.51178	3.77559
	951	cg12081359	chr 1: 25069665	-0.0222056	0.00101721	0.617879	-3.28572	CLIC4	-2094			CLIC4 (-2094)		12.1873	3.24836	9.88294	3.67871
	952	cg02898493	chr 17: 62097918	0.0253893	0.0081639	0.772699	2.64521	ICAM2	76	ICAM2;ICAM2;ICAM2;ICAM2;ICAM2;ICAM2;ICAM2;ICAM2	5'UTR;5'UTR;5'UTR;1stExon;1stExon;5'UTR;1stExon;1stExon	ICAM2 (+75)		1.98226	4.66522	4.82724	3.76018
	953	cg14066993	chr 4: 1203049	0.0265498	0.0103348	0.807209	2.56442	LOC100130872	-299	LOC100130872;LOC100130872-SPON2	TSS1500;TSS1500	SPON2 (-36393)	CTBP1 (+39858)	7.6569	4.37894	9.60771	4.92401
	954	cg08311935	chr 16: 89387805	0.0249607	0.00738763	0.762922	2.67885	LOC100287036	265	ANKRD11	5'UTR	ZNF778 (+103695)	ANKRD11 (+169163)	11.2255	4.08021	13.2989	4.22199
	955	cg08485527	chr 17: 75132777	-0.0310325	0.0145515	0.831245	-2.44335	SEC14L1	-4227			SEC14L1 (-4227)		15.2572	5.65633	11.7668	5.90964
	956	cg14821257	chr 15: 50642820	0.0223021	0.00136136	0.668275	3.20272	LOC100129387	-3550	GABPB1;GABPB1;FLJ10038;GABPB1;GABPB1;GABPB1	5'UTR;5'UTR;Body;5'UTR;5'UTR;5'UTR	HDC (-84659)	GABPB1 (+4784)	9.35613	3.26207	10.6402	3.79179
	957	cg11050793	chr 12: 124876650	0.0281794	0.0124084	0.825001	2.50031	NCOR2	-51900	NCOR2;NCOR2	Body;Body	NCOR2 (+175359)	ZNF664 (+418889)	35.2547	4.34275	37.6167	5.04038
	958	cg03185066	chr 3: 111580757	-0.029368	0.0134889	0.826951	-2.47059	PHLDB2	2190	PHLDB2;PHLDB2;PHLDB2;PHLDB2	5'UTR;Body;5'UTR;5'UTR	ABHD10 (-117070)	PHLDB2 (+2190)	5.03972	5.10692	1.71297	5.62784
	959	cg07072638	chr 7: 97821546	-0.0229964	0.00321882	0.704642	-2.94603	BHLHA15	-19231	LMTK2	Body	BHLHA15 (-20021)	LMTK2 (+85350)	8.26018	3.93216	6.15527	3.31664
	960	cg14293102	chr 19: 2232170	0.0355379	0.0161555	0.832281	2.40538	MIR1227	1978	DOT1L	3'UTR	SF3A2 (-4645)		11.9715	6.97845	14.0266	7.64225
	961	cg15396800	chr 1: 178943143	0.0240504	0.00584354	0.762074	2.75643	FAM20B	-51930			ANGPTL1 (-102929)	FAM20B (-51930)	4.13809	4.61342	6.5204	4.12967
	962	cg08408976	chr 16: 2810372	-0.0241328	0.00613148	0.762346	-2.74067	SRRM2	7746	SRRM2	Body	SRRM2 (+8043)	TCEB2 (+16924)	6.65357	3.8855	4.52013	4.12964
	963	cg00724315	chr 4: 1941849	-0.029312	0.0135126	0.826951	-2.46997	WHSC1	842	WHSC1;WHSC1;WHSC1;WHSC1;WHSC1;WHSC1	Body;Body;3'UTR;Body;Body;Body	WHSC1 (+68727)	WHSC2 (+69112)	6.76391	4.85132	4.87331	6.61877
	964	cg24749564	chr 5: 54923223	-0.024893	0.00742524	0.762922	-2.67715	SLC38A9	65331	SLC38A9	Body	PPAP2A (-92351)	SLC38A9 (+85330)	7.58902	4.69755	5.26625	3.49007
	965	cg03214444	chr 4: 184279397	-0.0286462	0.0129379	0.826062	-2.48547	CLDN24	-35818			CDKN2AIP (-86391)	CLDN24 (-35819)	3.59852	5.47355	1.15798	5.37133
	966	cg13344280	chr 15: 75649430	-0.021895	0.00033921	0.562141	-3.58335	MIR631	-3404	MAN2C1	Body	NEIL1 (+10100)	MAN2C1 (+11510)	3.98551	2.97197	1.99601	2.37001
	967	cg02357541	chr 3: 127769619	-0.0261686	0.00999373	0.805593	-2.57605	SEC61A1	-1592			SEC61A1 (-1592)		13.6921	5.7315	11.1899	5.40137
	968	cg15398152	chr 6: 32016535	-0.0285973	0.0129248	0.826062	-2.48584	TNXB	-2151	TNXB	Body	CYP21A2 (+10443)	TNXB (+60615)	9.36579	5.48032	5.78371	5.37116
	969	cg06033443	chr 21: 45658683	-0.0250155	0.00764814	0.764775	-2.66722	ICOSLG	2151	ICOSLG	Body	ICOSLG (+2150)	C21orf33 (+105190)	1.90873	4.59767	-0.723505	4.29486
	970	cg10738041	chr 2: 27991264	0.0218538	0.000190027	0.461884	3.73192	MRPL33	-3319			MRPL33 (-3319)		0.739243	2.63766	2.96268	2.70523
	971	cg18405330	chr 6: 164171960	0.0283165	0.0126823	0.825001	2.49257	AK093114	79325			QKI (+336286)		-1.00655	4.44603	1.32775	5.06488
	972	cg17063929	chr 11: 89224799	-0.0227159	0.00264665	0.695074	-3.00605	NOX4	-146	NOX4;NOX4;NOX4;NOX4	5'UTR;TSS200;TSS200;TSS200	NOX4 (-147)		5.01852	4.09719	2.08749	3.93878
	973	cg13730105	chr 9: 120466837	0.0321675	0.0151608	0.832281	2.42852	TLR4	378	TLR4;TLR4;TLR4	Body;Body;1stExon	TLR4 (+378)		5.57976	6.79307	8.04516	5.97592
	974	cg12791065	chr 15: 101419269	-0.029406	0.0136553	0.826951	-2.4662	ALDH1A3	-739	ALDH1A3	TSS1500	ALDH1A3 (-739)		8.46391	5.43994	5.23736	5.467
	975	cg27507473	chr 16: 86002958	-0.0288285	0.013203	0.826951	-2.47825	IRF8	66641			FOXF1 (-541174)	IRF8 (+70185)	12.7543	4.81369	9.83303	5.70563
	976	cg02602268	chr 12: 132488697	0.0319086	0.0151289	0.832281	2.42928	SNORA49	-27071	EP400	Body	EP400 (+54233)	DDX51 (+140182)	10.9874	6.15118	14.0402	6.04988
	977	cg06912420	chr 12: 14617656	0.0251488	0.00800119	0.769548	2.65202	BC067269	39718	ATF7IP	Body	ATF7IP (+99046)	PLBD1 (+103134)	11.7101	4.82666	13.715	3.60617
	978	cg27226153	chr 2: 121953958	0.0221252	0.000999608	0.617879	3.29064	TFCP2L1	37812			TFCP2L1 (+88819)	GLI2 (+399092)	3.72173	3.33611	6.07958	2.9097
	979	cg14597723	chr 19: 18210442	0.0247491	0.00729117	0.762922	2.68324	IL12RB1	-816	MAST3	Body	PIK3R2 (-53573)	MAST3 (+1840)	4.34986	3.45697	6.59021	4.50839
	980	cg23282659	chr 21: 36193786	-0.0258951	0.00958873	0.799095	-2.59032	AX746823	4917	RUNX1;RUNX1;RUNX1	Body;3'UTR;Body	CLIC6 (+152099)	RUNX1-IT1 (+217936)	1.36397	4.36861	-0.796932	4.59839
	981	cg05037024	chr 5: 155848920	-0.0275539	0.0120131	0.825001	-2.51176	SGCD	95154	SGCD;SGCD;SGCD	Body;Body;Body	PPP1R2P3 (-428628)	SGCD (+95154)	8.08445	5.44565	5.56765	4.37477
	982	cg14164839	chr 1: 26823481	0.0225697	0.00243804	0.695074	3.03093	HMGN2	24580			RPS6KA1 (-48861)	HMGN2 (+24580)	4.35475	3.77484	6.14339	3.3568
	983	cg00495136	chr 2: 241667586	-0.0220548	0.000970752	0.617879	-3.29887	KIF1A	-2171	KIF1A	Body	AQP12A (+36325)	KIF1A (+92138)	4.63615	3.93098	2.908	3.95142
	984	cg26558591	chr 16: 27829801	0.0266864	0.0110268	0.817474	2.54185	KIAA0556	41615	GSG1L;GSG1L	Body;Body	GTF3C1 (-268551)	GSG1L (+245028)	2.47398	5.47172	4.11416	5.3895
	985	cg25517015	chr 19: 17584020	0.0307848	0.0148568	0.831245	2.43585	SLC27A1	2721	SLC27A1	Body	PGLS (-38411)	SLC27A1 (+2721)	10.6522	5.67102	12.8798	5.60635
	986	cg25611057	chr 3: 197121419	0.0233734	0.00460569	0.739733	2.83339	DLG1	-95276			DLG1 (-95973)	BDH1 (+161438)	3.4538	5.25167	5.57565	4.05144
	987	cg04847110	chr 15: 40620444	0.0237149	0.00550867	0.76104	2.77568	AL832909	3764			DISP2 (-29989)	PLCB2 (-20271)	1.0071	3.28103	2.85646	4.32793
	988	cg25388800	chr 5: 137990243	0.0264023	0.0107396	0.814432	2.55106	HSPA9	-78925			CTNNA1 (-98863)	HSPA9 (-78926)	7.38446	5.10573	9.92898	3.81502
	989	cg09166898	chr 15: 41167165	-0.0251534	0.00829565	0.776096	-2.63979	RHOV	-678	RHOV	TSS1500	RHOV (-679)		2.50092	4.03337	-0.477664	5.02708
	990	cg23575099	chr 14: 55603874	0.0217041	7.51501e-05	0.461884	3.95936	LGALS3	7940	LGALS3;LGALS3	TSS200;5'UTR	LGALS3 (+7940)	DLGAP5 (+54521)	3.20364	2.65724	5.26347	2.95092
	991	cg24343430	chr 8: 117457111	-0.0223213	0.00187626	0.676137	-3.10915	EIF3H	310951			TRPS1 (-775884)	EIF3H (+310950)	3.17791	3.35036	0.80841	3.2601
	992	cg22735419	chr 19: 1360208	-0.0289177	0.0135662	0.826951	-2.46855	MUM1	2955	MUM1;MUM1	Body;Body	NDUFS7 (-23498)	MUM1 (+5233)	12.5613	5.13763	9.34473	5.10293
	993	cg21753652	chr 2: 45981098	0.0319165	0.0154494	0.832281	2.42167	TRNA_Pseudo	-43585	PRKCE	Body	EPAS1 (-543442)	PRKCE (+102056)	0.644454	6.79107	3.88441	4.90769
	994	cg15822394	chr 19: 17877733	-0.0285335	0.0132751	0.826951	-2.4763	FCHO1	4222	FCHO1;FCHO1;FCHO1;FCHO1	Body;Body;Body;Body	B3GNT3 (-28185)	MAP1S (+47431)	3.27898	5.00544	0.0970054	4.68678
	995	cg03196440	chr 20: 62583946	-0.0225678	0.00258175	0.695074	-3.01359	UCKL1-AS1	-790	UCKL1AS;UCKL1	TSS1500;Body	UCKL1 (+3853)	DNAJC5 (+57492)	11.5182	4.15717	9.78027	3.8055
	996	cg13979708	chr 6: 44695318	0.022033	0.00101671	0.617879	3.28586	BX647715	-3536			RUNX2 (-600735)	CDC5L (+340068)	-0.312494	2.94157	2.27656	3.07236
	997	cg14754494	chr 7: 50560743	0.0220418	0.00104981	0.617879	3.27683	LOC100129427	-38713	DDC;DDC	Body;Body	FIGNL1 (-42656)	DDC (+68024)	4.1674	2.82227	5.88195	3.27055
	998	cg17329648	chr 2: 73297389	0.0280882	0.0128237	0.825001	2.48863	SFXN5	1576	SFXN5	Body	SFXN5 (+1575)	EMX1 (+152786)	5.00538	5.67482	7.97347	4.2432
	999	cg27602386	chr 10: 112252566	-0.0280989	0.0129025	0.825627	-2.48645	DUSP5	-5058			SMNDC1 (-187860)	DUSP5 (-5058)	10.3235	5.15745	8.03437	5.12579
	1000	cg09753749	chr 1: 184359437	0.0229974	0.00388	0.726245	2.88776	C1orf21	3288	C1orf21	5'UTR	TSEN15 (+338627)	EDEM3 (+364603)	3.57582	3.02319	5.68935	3.79668

## Sheet: T3. MTG UPs
	Supplementary Table 3. Top 1000 Unmodified Positions in MTG
	Displayed for each probe is chromosomal position (genome build 37), log2 fold change estimate for the case-control analysis (logFC), accompanying p-values, Benjamini-Hochberg FDR adjusted values and t-statistics, UCSC gene annotation of closest transcription start site (TSS; column: ID) and the correspoding distance to the TSS (Distance TSS), Illumina gene annotation (UCSC Annotation) and genomic…
														Control		AD
	Rank	Probe ID	Position	logFC	P-value	FDR	t	ID	Distance TSS	UCSC Annotation	Region	GREAT Annotation		Average UC (%)	Standard Deviation	Average UC (%)	Standard Deviation
	1	cg13076843	chr 17: 74475294	-0.0448858	4.0421e-05	0.367404	-4.10506	RHBDF2	2333	RHBDF2;RHBDF2	Body;Body	RHBDF2 (+8696)	AANAT (+11665)	20.2311	5.20441	15.5166	3.915
	2	cg07363977	chr 11: 976167	0.0592828	0.000110938	0.419029	3.86533	AP2A2	4106	AP2A2	Body	AP2A2 (+50359)	MUC6 (+60538)	21.6756	5.44751	26.6411	7.82621
	3	cg04498110	chr 3: 39306129	-0.0442751	7.89132e-05	0.395399	-3.94768	CX3CR1	1871	CX3CR1;CX3CR1;CX3CR1;CX3CR1	3'UTR;3'UTR;3'UTR;3'UTR	XIRP1 (-72045)	CX3CR1 (+17096)	46.1685	7.12427	42.9413	7.43565
	4	cg27630153	chr 16: 88845038	-0.0393654	9.84507e-05	0.395399	-3.89438	PIEZO1	6334	FAM38A	Body	PIEZO1 (+6333)	CTU2 (+72148)	24.6	5.54202	20.8371	3.93129
	5	cg16859420	chr 8: 41219116	0.0387866	0.000110349	0.419029	3.86663	SFRP1	-52126			GOLGA7 (-128964)	SFRP1 (-52127)	63.5304	7.79469	67.4489	4.55601
	6	cg15974867	chr 11: 69464012	-0.0338632	7.09332e-06	0.254796	-4.49087	AK294004	5166	CCND1	Body	CCND1 (+8140)	ORAOV1 (+26152)	22.4609	3.72674	19.3685	2.85681
	7	cg04972348	chr 1: 1100035	-0.0356071	8.86873e-05	0.395399	-3.91962	MIR200B	-2448			C1orf159 (-48300)	TTLL10 (-9250)	49.3025	4.58685	46.1791	3.58474
	8	cg11823178	chr 8: 41519399	-0.0344062	0.000102684	0.403214	-3.88416	MIR486	-1373	ANK1;ANK1;ANK1;ANK1;ANK1;ANK1;ANK1;MIR486;ANK1	Body;Body;Body;Body;Body;Body;Body;TSS1500;Body	NKX6-3 (-14525)	ANK1 (+234880)	15.8775	4.21861	12.498	3.66565
	9	cg10676327	chr 4: 6659735	-0.0550415	0.000435168	0.560325	-3.51778	LOC93622	-16067			S100P (-35830)	MRFAP1 (+17291)	34.5661	7.04863	28.5871	6.96665
	10	cg22090150	chr 17: 4098227	-0.0376711	0.000245611	0.516726	-3.66679	CYB5D2	51766	ANKFY1;ANKFY1	Body;Body	CYB5D2 (+51766)	ANKFY1 (+69046)	20.7016	5.09937	15.7814	4.96383
	11	cg09595079	chr 12: 121273323	-0.0325853	4.30082e-05	0.371186	-4.0907	SPPL3	-65382	SPPL3	Body	SPPL3 (+68831)	ACADS (+109753)	58.9183	5.57789	56.5976	4.37412
	12	cg16058600	chr 2: 157183013	-0.0362897	0.00023705	0.516726	-3.67586	NR4A2	1513	NR4A2	Body	NR4A2 (+6273)		40.2705	6.12574	36.7676	4.90264
	13	cg24523591	chr 3: 178893304	-0.0310687	1.22483e-05	0.256374	-4.37312	PIK3CA	26994	PIK3CA	5'UTR	PIK3CA (+26994)	KCNMB3 (+91533)	32.7813	3.05957	30.287	3.39469
	14	cg20488756	chr 6: 30131586	-0.0353955	0.000308576	0.559119	-3.60799	TRIM15	604	TRIM15	1stExon	TRIM10 (-2876)		34.7892	4.5364	31.3307	4.06123
	15	cg03185704	chr 7: 150020125	-0.0315388	7.56509e-05	0.395399	-3.95778	LRRC61	-170	LRRC61;ACTR3C;LRRC61	TSS200;5'UTR;TSS200	ACTR3C (+632)		64.0061	4.57485	62.9174	5.25535
	16	cg06674932	chr 11: 110299342	0.0414586	0.000482413	0.579323	3.49034	FDX1	-1318	FDX1	TSS1500	FDX1 (-1318)		28.9599	5.71203	32.9492	4.48712
	17	cg25898192	chr 15: 33418895	0.0392922	0.000432373	0.560325	3.51949	FMN1	-58810			RYR3 (-184281)	FMN1 (-58811)	73.3752	5.86687	78.1725	5.3167
	18	cg11422551	chr 1: 183812856	0.0309091	5.59172e-05	0.382791	4.02941	RGL1	38582	RGL1	Body	APOBEC4 (-190409)	GLT25D2 (+194006)	25.8901	3.84192	28.3975	3.31225
	19	cg04794430	chr 17: 3290071	-0.0333004	0.000216097	0.495398	-3.69942	OR1E1	11633			OR1E1 (+11632)	OR3A4P (+76533)	65.7563	3.80681	63.361	4.3841
	20	cg23689722	chr 1: 3100956	0.031442	9.75516e-05	0.395399	3.8966	MIR4251	56418	PRDM16;PRDM16	Body;Body	ARHGEF16 (-270190)	PRDM16 (+115215)	39.5068	3.65894	43.4826	4.536
	21	cg01513307	chr 6: 108479557	0.0308365	5.48088e-05	0.382791	4.03411	NR2E1	-7657			OSTM1 (-83617)	NR2E1 (-7657)	72.8894	3.08762	76.2519	3.32713
	22	cg16805995	chr 6: 112671958	0.0321971	0.000177584	0.493368	3.74894	RFPL4B	1048	RFPL4B	3'UTR	RFPL4B (+3427)		28.4048	3.7583	30.6901	5.43809
	23	cg10312476	chr 1: 29780268	-0.0311378	0.000138994	0.458431	-3.80995	PTPRU	133547			PTPRU (+217241)		70.6818	3.88995	68.7845	4.50071
	24	cg08803490	chr 12: 80288661	-0.0308249	0.0001468	0.458431	-3.79642	PPP1R12A	19030	PPP1R12A;PPP1R12A;PPP1R12A	Body;Body;5'UTR	PAWR (-203872)	PPP1R12A (+40316)	32.1567	4.84488	29.2198	3.84464
	25	cg09281979	chr 2: 172289850	-0.0308928	0.0001557	0.465987	-3.7818	METTL8	769	DCAF17;METTL8;DCAF17;DCAF17	TSS1500;5'UTR;TSS1500;TSS1500	DCAF17 (-910)		41.4025	4.04959	38.9984	4.24542
	26	cg12163800	chr 17: 74475355	-0.0319098	0.000285358	0.539827	-3.62824	RHBDF2	2272	RHBDF2;RHBDF2	Body;Body	RHBDF2 (+8635)	AANAT (+11726)	16.2935	4.61764	12.6812	2.9119
	27	cg23449541	chr 21: 47855893	-0.033753	0.000444821	0.560325	-3.51196	DIP2A	-22968	PCNT	Body	DIP2A (-22968)	PCNT (+111858)	28.0056	4.66712	23.5947	4.58702
	28	cg21441945	chr 1: 151737704	-0.0281331	1.38856e-05	0.256374	-4.34566	OAZ3	-1426	OAZ3;OAZ3	Body;TSS1500	MRPL9 (-1665)	OAZ3 (-1426)	56.3113	3.7654	54.2994	3.94719
	29	cg05417607	chr 17: 1373605	-0.0283231	3.50053e-05	0.347078	-4.13819	CRK	-14044	MYO1C;MYO1C;MYO1C	Body;Body;Body	CRK (-14045)	MYO1C (+22395)	14.0955	3.54842	10.7059	3.10448
	30	cg19457506	chr 17: 43099559	0.0360255	0.000642804	0.60378	3.41288	DCAKD	12950			C1QL1 (-53916)	DCAKD (+29418)	79.6232	5.49904	83.9635	3.83675
	31	cg17136073	chr 13: 23310675	-0.0335301	0.000512665	0.588447	-3.47405	BC048997	-83805			SGCG (-444384)		28.5539	4.05665	25.0223	4.3584
	32	cg06958937	chr 3: 184045017	0.0278913	9.75759e-06	0.256374	4.42248	SNORD66	1534	EIF4G1;EIF4G1;EIF4G1;EIF4G1;EIF4G1	Body;Body;Body;Body;Body	FAM131A (-10258)	EIF4G1 (+12735)	26.8974	3.13576	29.3218	2.74079
	33	cg09982942	chr 2: 112898400	-0.0406163	0.000788921	0.613793	-3.35665	FBLN7	2439	FBLN7;FBLN7	Body;Body	FBLN7 (+2439)	ZC3H8 (+114263)	47.1545	5.05833	43.3078	7.31629
	34	cg11491537	chr 2: 132511720	-0.040423	0.000777048	0.610252	-3.36084	C2orf27A	31657	C2orf27A	Body	GPR39 (-662426)	LOC150776 (+261335)	27.5738	5.99858	23.1213	5.07888
	35	cg12362517	chr 11: 133800685	0.0303357	0.00027013	0.533002	3.64238	IGSF9B	7310	IGSF9B	Body	SPATA19 (-85294)	IGSF9B (+26194)	30.3768	2.97473	33.7706	4.25417
	36	cg14150252	chr 2: 64069583	0.0312587	0.000362379	0.559119	3.56607	UGP2	65	UGP2;UGP2	Body;5'UTR	UGP2 (+570)		74.3638	3.67847	78.4581	4.22067
	37	cg04929173	chr 22: 29704483	0.0297688	0.000204377	0.493732	3.71354	GAS2L1	1436	GAS2L1;GAS2L1;GAS2L1	Body;Body;Body	GAS2L1 (+1487)	RASL10A (+7264)	41.185	4.40054	43.7832	5.02299
	38	cg23711873	chr 10: 77035993	-0.0317603	0.000449609	0.560325	-3.50911	ZNF503-AS1	-20147			COMTD1 (-40224)	ZNF503 (+125519)	50.3963	4.64323	48.3363	5.04296
	39	cg08759742	chr 5: 141292953	-0.0271728	1.20277e-06	0.159006	-4.85518	KIAA0141	-10431			PCDH1 (-35010)	KIAA0141 (-10431)	36.2808	3.63566	33.3064	4.15005
	40	cg07799395	chr 5: 125577565	-0.0314675	0.000519962	0.590456	-3.47026	GRAMD3	-118222			ALDH7A1 (+353516)		44.3684	6.11276	40.0294	4.1672
	41	cg05409419	chr 14: 30953702	-0.0349199	0.000769906	0.609064	-3.36339	G2E3	-74626			PRKD1 (-556804)	G2E3 (-74626)	34.798	5.50524	31.4897	4.4539
	42	cg27385726	chr 16: 3351249	0.0285148	0.000235758	0.516726	3.67725	TIGD7	-635	TIGD7;TIGD7	1stExon;5'UTR	ZNF75A (-4183)		23.9502	4.35249	26.3981	3.90899
	43	cg04745064	chr 6: 29416095	-0.0273772	6.55698e-05	0.389806	-3.99181	OR10C1	8380			OR2H1 (-10134)	OR10C1 (+8380)	31.5802	3.4476	28.932	3.20279
	44	cg18102633	chr 19: 17487776	-0.0407486	0.00100385	0.638766	-3.28944	PLVAP	361	PLVAP	1stExon	PLVAP (+360)		24.1851	5.51546	19.296	5.44592
	45	cg08714895	chr 1: 17996919	0.0290521	0.000314364	0.559119	3.60317	ARHGEF10L	-23622	ARHGEF10L;ARHGEF10L	Body;Body	ACTL8 (-84888)	ARHGEF10L (+130590)	29.5662	4.84877	32.108	4.68496
	46	cg16529799	chr 5: 94277008	-0.0299248	0.000392451	0.560325	-3.54511	MCTP1	-11602	MCTP1;MCTP1	Body;Body	ANKRD32 (+322618)	MCTP1 (+343270)	38.8129	3.99977	35.994	4.479
	47	cg01865066	chr 16: 1178445	-0.0268378	2.56464e-07	0.101714	-5.15292	CACNA1H	-24795			C1QTNF8 (-32202)	CACNA1H (-24795)	19.5696	2.67722	17.2887	2.38517
	48	cg03183215	chr 10: 1252341	0.0358313	0.000893859	0.638766	3.32197	ADARB2	-6010	ADARB2	Body	IDI1 (-157281)	ADARB2 (+527328)	9.83083	2.25167	13.7977	5.63015
	49	cg00706536	chr 17: 40609826	0.0306068	0.00050758	0.586899	3.47672	ATP6V0A1	-1035	ATP6V0A1;ATP6V0A1;ATP6V0A1	TSS1500;TSS1500;TSS1500	ATP6V0A1 (-1035)		34.9914	3.19428	37.4233	4.47558
	50	cg13313836	chr 15: 60687284	-0.0278701	0.000191256	0.493368	-3.73029	ANXA2	2901	ANXA2;ANXA2;ANXA2;ANXA2	5'UTR;5'UTR;Body;5'UTR	ANXA2 (+2900)	FOXB1 (+390864)	29.1733	5.09315	26.1626	4.49122
	51	cg16266698	chr 3: 42244474	0.0268001	1.42214e-05	0.256374	4.34041	U4	-18857	TRAK1;TRAK1	Body;Body	CCK (+60964)	TRAK1 (+111729)	30.1617	3.77309	32.3674	3.1573
	52	cg16301617	chr 17: 76128906	-0.0267301	1.34482e-05	0.256374	-4.35268	TMC6	-418	TMC8;TMC6	Body;TSS1500	TMC6 (-4046)	TMC8 (+2048)	37.164	2.53276	34.3235	2.87686
	53	cg06680065	chr 12: 71835739	-0.030187	0.000495682	0.582675	-3.48308	TSPAN8	-61	LGR5	Body	THAP2 (-221937)	LGR5 (+1927)	40.6798	6.79931	37.442	7.10386
	54	cg10763953	chr 7: 114741115	-0.0292537	0.000395023	0.560325	-3.54339	BC022431	22104			MDFIC (+178907)	TFEC (+929751)	25.3047	3.79356	21.7439	4.0646
	55	cg06724693	chr 1: 3010896	0.0275198	0.000156269	0.465987	3.78089	PRDM16	25155	PRDM16;PRDM16	Body;Body	ARHGEF16 (-360250)	PRDM16 (+25155)	43.4172	4.28328	45.4903	5.77699
	56	cg03455107	chr 17: 54509207	-0.0311454	0.000635098	0.60378	-3.41616	NOG	-161852	ANKFN1	Body	NOG (-161852)	PCTP (+680868)	32.4757	4.64928	30.4291	6.77828
	57	cg24656269	chr 11: 132271581	0.0270834	9.92683e-05	0.395399	3.89237	U6	-124121			NTM (+490870)	OPCML (+541455)	37.1532	7.87159	39.0144	7.57194
	58	cg07593326	chr 13: 100958088	-0.0285794	0.000370312	0.559119	-3.56038	PCCA	216820	PCCA;PCCA	Body;Body	PCCA (+216820)	A2LD1 (+227967)	29.9226	5.12153	26.2952	3.91921
	59	cg06246357	chr 6: 1524494	-0.0313429	0.000684156	0.607351	-3.39585	DD413621	-10529			FOXC1 (-86186)	FOXF2 (+134426)	72.4502	4.46431	70.5778	4.9231
	60	cg09225287	chr 7: 80549171	-0.0267703	8.78996e-05	0.395399	-3.92177	SEMA3C	-504	SEMA3C	TSS1500	SEMA3C (-505)		34.4557	3.22473	32.614	3.5305
	61	cg00360761	chr 2: 43398079	-0.0314562	0.000715773	0.609064	-3.38347	ZFP36L2	55666			HAAO (-378329)	ZFP36L2 (+55665)	21.6064	5.72823	18.1903	5.20783
	62	cg13847640	chr 2: 87035982	-0.0324024	0.000825537	0.628021	-3.34409	CD8A	-463	CD8A	TSS1500	CD8A (-17146)	CD8B (+53064)	67.1034	4.34769	65.4278	5.34391
	63	cg14464361	chr 2: 237029101	0.0327709	0.000856257	0.632923	3.33394	GBX2	47551	AGAP1;AGAP1	Body;Body	GBX2 (+47550)	AGAP1 (+626369)	19.2095	3.88957	22.8856	5.32352
	64	cg01204982	chr 11: 74870741	-0.0262151	3.83846e-06	0.217476	-4.61994	SLCO2B1	-102	SLCO2B1;SLCO2B1;SLCO2B1	TSS200;Body;Body	SLCO2B1 (+8710)	ARRB1 (+192133)	41.6341	2.68242	39.6404	2.70772
	65	cg08835755	chr 4: 1514317	-0.0545389	0.0014067	0.668622	-3.19327	AX748388	63649			CRIPAK (+128978)	FAM53A (+171670)	52.6853	8.32017	48.3446	8.67644
	66	cg02058994	chr 5: 2036636	0.0271779	0.000278551	0.537436	3.63447	IRX4	-153756			IRX4 (-153757)	IRX2 (+715132)	19.4815	4.06522	21.4438	3.43
	67	cg13919908	chr 11: 33394273	-0.0271453	0.000268721	0.532873	-3.64372	HIPK3	44218			C11orf41 (-169603)	HIPK3 (+115106)	34.8667	4.23023	32.2415	3.72697
	68	cg15194251	chr 11: 2239813	-0.0265055	0.000114786	0.425458	-3.857	MIR4686	45521			TH (-46779)	ASCL2 (+52368)	31.2245	4.59982	28.4214	4.35273
	69	cg18580232	chr 2: 116155326	-0.0261242	3.17736e-05	0.323113	-4.16037	DPP10	235643	DPP10;DPP10	Body;Body	DPP10 (+235814)		23.6549	2.69704	20.8747	2.66562
	70	cg05810363	chr 17: 74475270	-0.0321659	0.000928661	0.638766	-3.31129	RHBDF2	2357	RHBDF2;RHBDF2	Body;Body	RHBDF2 (+8720)	AANAT (+11641)	12.0392	5.45194	7.87794	3.42295
	71	cg21948665	chr 15: 41519554	-0.0277268	0.000399833	0.560325	-3.54019	EXD1	3341	EXD1	Body	CHP (-3882)	EXD1 (+3340)	21.5373	3.4914	19.1609	3.70604
	72	cg12798338	chr 17: 76128683	-0.0317072	0.000909425	0.638766	-3.31714	TMC6	-195	TMC8;TMC6	Body;TSS200	TMC6 (-3823)	TMC8 (+1825)	27.393	4.47567	25.0305	5.0211
	73	cg27064178	chr 22: 50178220	0.0361647	0.00123141	0.660798	3.2315	LOC90834	-4262	BRD1	Body	BRD1 (+40231)		39.0262	4.51625	41.7145	5.94232
	74	cg26844804	chr 15: 102267900	-0.0391502	0.00133614	0.663763	-3.2081	TARSL2	-3255			TARSL2 (-3256)		18.8816	7.80227	14.8108	2.17806
	75	cg14426449	chr 14: 103777785	0.0268866	0.000284988	0.539827	3.62858	JA429130	11231			EIF5 (-22707)	TNFAIP2 (+185122)	64.3356	4.12415	66.3857	4.88197
	76	cg22023879	chr 6: 31767600	0.0272564	0.000372838	0.559119	3.5586	VARS	-3888	LSM2	Body	VARS (-3889)		25.1447	3.12067	27.7851	3.64639
	77	cg22288309	chr 15: 50287417	-0.02857	0.000606593	0.600137	-3.42865	ATP8B4	-92937	ATP8B4	Body	ATP8B4 (+124001)	FGF7 (+572043)	26.6047	4.00236	23.8771	4.22843
	78	cg20080492	chr 19: 1777679	-0.0269875	0.000332232	0.559119	-3.58878	ONECUT3	24018			ONECUT3 (+24018)	ATP8B3 (+34519)	50.1374	3.74245	48.1485	4.16271
	79	cg10405729	chr 11: 58483730	-0.0254676	6.10316e-06	0.254796	-4.52278	GLYAT	15717	GLYAT;GLYAT	Body;Body	GLYAT (+15716)	CNTF (+93585)	26.0396	2.86001	23.446	2.98211
	80	cg07077459	chr 6: 144329052	0.0289601	0.000702963	0.607351	3.38842	PLAGL1	489	HYMAI;PLAGL1;PLAGL1;PLAGL1;PLAGL1;PLAGL1;PLAGL1;PLAGL1;PLAGL1	Body;5'UTR;5'UTR;5'UTR;5'UTR;5'UTR;5'UTR;5'UTR;5'UTR	PLAGL1 (+488)		70.2302	6.66457	73.1722	7.30711
	81	cg26558591	chr 16: 27829801	-0.0257702	8.51815e-05	0.395399	-3.92933	KIAA0556	41615	GSG1L;GSG1L	Body;Body	GTF3C1 (-268551)	GSG1L (+245028)	29.6721	3.76333	28.1633	4.30741
	82	cg11746396	chr 1: 65157749	0.0296768	0.000795485	0.613793	3.35436	AK026777	2768	CACHD1	3'UTR	RAVER2 (-53028)	CACHD1 (+221274)	48.4435	3.73243	50.3436	5.13409
	83	cg11908659	chr 2: 62736315	-0.0284526	0.000679069	0.606574	-3.39789	TMEM17	-2711			TMEM17 (-2712)		27.4635	5.31298	24.7999	5.53617
	84	cg14401592	chr 4: 156787800	-0.0271058	0.000447491	0.560325	-3.51037	ACCN5	-375	ACCN5	TSS1500	ACCN5 (-376)		25.5117	3.38584	22.4418	3.51618
	85	cg08570243	chr 2: 110969853	-0.0384772	0.00146117	0.668622	-3.18229	LINC00116	3540	NCRNA00116	Body	NPHP1 (-7215)	LIMS3 (+260798)	87.3928	4.6424	84.0371	6.54184
	86	cg17644776	chr 2: 200775616	0.0534396	0.00167447	0.679495	3.14261	C2orf69	-362	C2orf69	TSS1500	C2orf69 (-362)		53.2942	6.41117	59.1798	8.09877
	87	cg20494738	chr 12: 124985889	0.025231	2.05456e-05	0.271613	4.25888	NCOR2	-5975	NCOR2;NCOR2	5'UTR;5'UTR	NCOR2 (+66120)	ZNF664 (+528128)	57.4992	7.42812	59.4624	6.10786
	88	cg24720242	chr 4: 24705908	-0.0261808	0.000325002	0.559119	-3.59451	SOD3	-91176			DHX15 (-119725)	SOD3 (-91176)	35.8807	4.23406	32.5952	3.55873
	89	cg15402156	chr 19: 57669719	-0.0271394	0.000576544	0.592363	-3.44242	DUXA	9137	DUXA	Body	ZIM3 (-13150)	DUXA (+9136)	45.0067	3.22721	42.4577	3.40568
	90	cg07455933	chr 5: 760474	0.0300022	0.00102774	0.638766	3.28282	ZDHHC11	63452			TPPP (-66965)	ZDHHC11 (+90626)	31.0522	4.45145	32.7447	4.93281
	91	cg19582115	chr 14: 103436037	0.0300611	0.0010569	0.638766	3.27493	CDC42BPB	-5050	CDC42BPB	Body	AMN (+47045)	CDC42BPB (+87704)	31.275	3.46573	34.3452	5.24641
	92	cg08118287	chr 1: 248753499	-0.0273425	0.000655977	0.605158	-3.40735	OR2T10	3570			OR2T34 (-15442)	OR2T10 (+3569)	33.477	5.65376	30.4661	4.30835
	93	cg17240135	chr 2: 112898493	-0.0340691	0.0014542	0.668622	-3.18367	FBLN7	2532	FBLN7;FBLN7	Body;Body	FBLN7 (+2532)	ZC3H8 (+114170)	39.9495	4.76374	36.777	6.32664
	94	cg07318609	chr 10: 128585354	0.0265205	0.000489508	0.582568	3.48643	DOCK1	-8668			C10orf90 (-375345)	DOCK1 (-8668)	63.623	4.01677	67.0379	3.66703
	95	cg12615879	chr 12: 58013172	-0.041133	0.00173607	0.68618	-3.13202	SLC26A10	-520	SLC26A10	TSS1500	SLC26A10 (-520)		41.3153	5.49316	38.046	6.67672
	96	cg14214425	chr 12: 130623165	0.033771	0.00145821	0.668622	3.18287	FLJ31485	23058			TMEM132D (-234954)	FZD10 (-23838)	25.665	5.24791	28.7846	4.95076
	97	cg19343014	chr 12: 97611381	-0.0313432	0.00126873	0.660798	-3.22296	Mir_584	104452			NEDD1 (+310381)		30.0119	7.53794	25.7446	3.85043
	98	cg05740106	chr 6: 169273346	0.0271011	0.000703749	0.607351	3.38811	SMOC2	255425			THBS2 (+380790)	SMOC2 (+431516)	33.9016	4.03716	36.5741	6.00815
	99	cg10134799	chr 6: 14001972	-0.0344117	0.00156736	0.671289	-3.16191	RNF182	24622			CD83 (-115892)	RNF182 (+76549)	38.0823	6.18183	35.4116	4.72993
	100	cg12465518	chr 17: 58308936	-0.024556	1.65837e-05	0.257948	-4.30653	SCARNA20	70	SCARNA20;USP32	Body;Body	CA4 (+81635)	USP32 (+160649)	47.2966	5.44558	44.9889	5.3349
	101	cg14926093	chr 2: 3680421	0.0314302	0.00137814	0.668622	3.19919	BC113076	-15127	COLEC11;COLEC11	Body;Body	ALLC (-25364)	COLEC11 (+37785)	14.9876	3.51752	16.8797	5.49278
	102	cg25185947	chr 3: 108897005	0.0288811	0.00106188	0.638766	3.2736	LINC00488	-6	C3orf66	TSS200	MORC1 (-60013)	DPPA2 (+138358)	44.1894	3.97488	46.0989	3.91107
	103	cg24896021	chr 8: 6630930	0.0282371	0.000988726	0.638766	3.29372	MIR4659B	-28169			XKR5 (+62235)	AGPAT5 (+65053)	46.3156	5.3222	47.0895	7.04063
	104	cg17323099	chr 12: 110605944	0.0310029	0.00135877	0.664455	3.20327	IFT81	40780	IFT81;IFT81;IFT81	Body;Body;3'UTR	ATP2A2 (-113087)	IFT81 (+43805)	26.2674	4.88464	27.9852	5.43115
	105	cg01064286	chr 1: 212777218	-0.0270034	0.000749842	0.609064	-3.37068	ATF3	-4751	ATF3	5'UTR	ATF3 (-4751)		27.5902	3.74101	24.0231	4.01802
	106	cg12155969	chr 15: 92849000	-0.0257528	0.000429385	0.560325	-3.52133	ST8SIA2	-88139			ST8SIA2 (-88139)	SLCO3A1 (+452063)	56.316	4.49714	55.3334	3.98294
	107	cg09651136	chr 15: 72525012	-0.0259573	0.000489568	0.582568	-3.4864	PKM2	-1285	PKM2;PKM2;PKM2	TSS1500;TSS1500;TSS1500	PKM2 (-1286)		40.4694	2.67661	38.1404	3.58665
	108	cg15742468	chr 6: 151643632	-0.0263302	0.000612801	0.600137	-3.42588	AKAP12	-3033	AKAP12	Body	ZBTB2 (+69044)	AKAP12 (+82499)	28.8856	4.12942	26.0012	4.02345
	109	cg26788216	chr 2: 102844110	-0.0260934	0.000554936	0.592363	-3.45273	IL1RL2	40645	IL1RL2	Body	IL1RL1 (-83851)	IL1RL2 (+40678)	68.2878	4.2055	66.0717	4.16614
	110	cg21686171	chr 1: 9504429	-0.0317133	0.00150836	0.67102	-3.17307	5S_rRNA	-6592			SLC25A33 (-95098)	SPSB1 (+151489)	27.6397	5.29488	23.9979	4.48021
	111	cg06703573	chr 16: 1364331	0.024487	9.83622e-05	0.395399	3.8946	UBE2I	311	UBE2I;UBE2I;UBE2I;UBE2I	Body;Body;Body;Body	BAIAP3 (-20173)	UBE2I (+5178)	20.5736	2.2367	21.6078	4.34512
	112	cg20352402	chr 6: 135271333	-0.0273711	0.000954977	0.638766	-3.30347	ALDH8A1	-73	ALDH8A1;ALDH8A1	TSS200;TSS200	ALDH8A1 (-74)		30.3331	3.65544	27.4092	3.57068
	113	cg12602909	chr 3: 4512309	-0.0270217	0.000888079	0.638766	-3.32377	SUMF1	-3343			SUMF1 (-3344)		28.5199	4.39529	25.8258	3.39453
	114	cg09969277	chr 15: 89922328	-0.0242276	3.94866e-05	0.367404	-4.11046	LOC254559	1056	LOC254559	Body	POLG (-44303)	RHCG (+117470)	82.1493	3.05622	80.7443	3.98767
	115	cg20120438	chr 19: 4305239	-0.0254704	0.00044818	0.560325	-3.50996	FSD1	649	FSD1	Body	TMIGD2 (-2812)	FSD1 (+649)	64.1129	2.71952	61.3623	3.40343
	116	cg22596016	chr 17: 61711557	-0.0296857	0.00135132	0.664455	-3.20485	MAP3K3	11757	MAP3K3;MAP3K3	Body;Body	MAP3K3 (+11757)	LIMD2 (+65961)	41.2143	3.77495	39.0567	5.18234
	117	cg18162767	chr 13: 75904093	-0.0288749	0.00125382	0.660798	-3.22635	TBC1D4	-13354	TBC1D4	Body	TBC1D4 (+152156)		43.7747	5.0031	41.0609	5.05417
	118	cg25640096	chr 6: 1374513	-0.0256021	0.000501466	0.58323	-3.47997	FOXF2	-15555			FOXF2 (-15555)	FOXQ1 (+61839)	30.9969	3.05768	28.3422	3.48342
	119	cg22332049	chr 2: 240609875	-0.0290486	0.00127765	0.660798	-3.22095	LOC150935	-74678			HDAC4 (-287233)	NDUFA10 (+354943)	47.1533	4.21729	44.8785	5.51104
	121	cg15251598	chr 10: 131731416	-0.0384108	0.00201954	0.702567	-3.08734	EBF3	30675	EBF3	Body	EBF3 (+30674)	MGMT (+465963)	44.4168	7.02335	40.0167	6.44752
	120	cg24734069	chr 14: 96509923	0.0265497	0.000793849	0.613793	3.35493	C14orf132	4263	C14orf132	Body	BDKRB2 (-161211)	C14orf132 (+4263)	16.8834	3.322	18.8087	3.54232
	122	cg20014988	chr 10: 52363132	-0.0270439	0.000940556	0.638766	-3.30773	RNase_MRP	-17669	SGMS1	5'UTR	ASAH2 (-354763)	SGMS1 (+20604)	43.68	4.49762	41.8602	5.2935
	123	cg04828493	chr 13: 111328783	-0.0272166	0.000987308	0.638766	-3.29412	CARS2	29697	CARS2	Body	CARS2 (+29696)	CARKD (+60853)	23.9426	2.91743	21.2692	4.05434
	124	cg21314318	chr 15: 100651510	0.0240862	2.17547e-05	0.277232	4.24608	AK093600	-44136	ADAMTS17	Body	LYSMD4 (-377885)	ADAMTS17 (+230672)	43.6704	3.01118	46.562	3.49689
	125	cg14268557	chr 6: 28874547	-0.0245816	0.000201527	0.493368	-3.71709	TRNA_Leu	-10442	TRIM27	Body	SCAND3 (-319436)	TRIM27 (+17220)	19.1994	2.75415	16.9047	3.02593
	126	cg05490519	chr 16: 2908934	-0.0342373	0.00187057	0.699357	-3.11005	PRSS22	-763	PRSS22	TSS1500	PRSS22 (-764)		63.7905	5.15525	60.7031	5.54899
	127	cg07630078	chr 16: 89009557	-0.0248026	0.000279152	0.537436	-3.63392	CBFA2T3	-1340	CBFA2T3	Body	PABPN1L (-76490)	CBFA2T3 (+33946)	46.777	2.73034	44.4529	3.28224
	128	cg10841756	chr 1: 161059267	-0.0243944	0.000166565	0.482189	-3.76498	PVRL4	118	PVRL4;PVRL4	5'UTR;1stExon	PVRL4 (+117)		15.652	3.13394	13.4037	2.65355
	129	cg02773399	chr 9: 110226215	0.0242428	9.89177e-05	0.395399	3.89323	KLF4	24513			KLF4 (+25831)	RAD23B (+180699)	15.4707	3.10808	17.6827	2.45405
	130	cg15348679	chr 21: 45626491	-0.0247053	0.000262811	0.530467	-3.64944	ICOSLG	34343			ICOSLG (+34342)	C21orf33 (+72998)	23.4792	2.78229	20.9364	3.8257
	131	cg14022542	chr 7: 158771848	0.0239975	2.45519e-05	0.286391	4.21888	LOC154822	-29196			ESYT2 (-149530)	VIPR2 (+165800)	20.995	2.15666	23.0827	2.52416
	132	cg20618448	chr 19: 49962324	-0.0250219	0.000372953	0.559119	-3.55852	ALDH16A1	5852	ALDH16A1;ALDH16A1	Body;Body	FLT3LG (-15141)	ALDH16A1 (+5852)	13.4752	3.34406	10.5378	3.45011
	133	cg00496504	chr 3: 12625394	0.0241746	9.80698e-05	0.395399	3.89532	RAF1	25440	RAF1	3'UTR	MKRN2 (+26801)	RAF1 (+80305)	36.692	2.64251	39.1151	3.27052
	134	cg20965743	chr 14: 104552209	-0.0466315	0.00225064	0.705938	-3.055	ASPG	187	ASPG	Body	ASPG (+187)		74.7142	5.62561	72.2233	8.3638
	135	cg11207300	chr 12: 95867190	0.0255557	0.000575184	0.592363	3.44305	METAP2	-631	METAP2	TSS1500	METAP2 (-631)		76.9771	5.62617	79.4764	3.79805
	136	cg11401820	chr 15: 82425284	0.0242698	0.000164736	0.480398	3.76773	BC043257	44350	EFTUD1;EFTUD1	Body;Body	MEX3B (-86924)	EFTUD1 (+129819)	41.9408	5.92696	44.3786	5.81536
	137	cg10949319	chr 10: 105154064	0.0262191	0.000782299	0.613162	3.35898	MIR1307	94	MIR1307;USMG5	Body;5'UTR	PDCD11 (-2347)	USMG5 (+2205)	22.3896	4.30119	24.2076	3.70943
	138	cg04320476	chr 17: 1492206	-0.0266635	0.000973669	0.638766	-3.29803	SLC43A2	16005	SLC43A2	Body	PITPNA (-26097)	SLC43A2 (+39923)	30.5002	4.51862	27.7353	4.2769
	139	cg22851864	chr 10: 5688470	0.0256825	0.00069838	0.607351	3.39021	ASB13	20088	ASB13;ASB13	Body;Body	ASB13 (+20087)	CALML3 (+121547)	32.474	2.73266	35.4872	4.83303
	140	cg21876918	chr 19: 2085483	0.0241299	0.000176527	0.493368	3.75044	MOB3A	-6765	MOBKL2A	5'UTR	MKNK2 (-34241)	MOB3A (+10785)	36.8904	3.90518	39.7099	4.10207
	141	cg12194864	chr 17: 75463025	0.0262457	0.000919792	0.638766	3.31398	41161	-8299	SEPT9;SEPT9;SEPT9;SEPT9;SEPT9;SEPT9	Body;5'UTR;Body;Body;Body;Body	TNRC6C (-537292)	SEPT9 (+185534)	36.1025	3.73967	38.7627	6.28878
	142	cg20842677	chr 6: 32974643	-0.0240155	0.000163204	0.479458	-3.77007	HLA-DOA	2746	HLA-DOA	Body	HLA-DOA (+2745)	BRD2 (+33783)	19.6457	3.00281	17.4852	3.1151
	143	cg01332054	chr 15: 74494861	-0.0258354	0.000817585	0.625973	-3.34677	STRA6	359	STRA6;STRA6;STRA6;STRA6;STRA6	5'UTR;5'UTR;5'UTR;5'UTR;5'UTR	STRA6 (+358)		48.8009	4.08653	47.2265	4.38196
	144	cg12309456	chr 17: 74475402	-0.026478	0.00101818	0.638766	-3.28545	RHBDF2	2225	RHBDF2;RHBDF2	Body;Body	RHBDF2 (+8588)	AANAT (+11773)	13.7135	4.32724	10.3744	3.19336
	145	cg26605164	chr 10: 102821565	-0.0255055	0.000709461	0.607716	-3.3859	KAZALD1	567	KAZALD1;KAZALD1	1stExon;5'UTR	KAZALD1 (+567)		48.6599	3.78051	47.2946	4.32406
	146	cg17042000	chr 7: 158215122	-0.0254491	0.000707141	0.607351	-3.3868	MIR595	110383	PTPRN2;PTPRN2;PTPRN2	Body;Body;Body	PTPRN2 (+165359)		41.2543	4.43386	37.781	5.3075
	147	cg16567723	chr 13: 114202683	0.0252214	0.00062698	0.60378	3.41967	TFDP1	-36319	TMCO3	Body	TFDP1 (-36372)	TMCO3 (+57376)	74.3015	3.23346	76.5975	3.94532
	148	cg18365406	chr 19: 11472110	-0.0243078	0.000340339	0.559119	-3.58249	Prion_pknot	1471	LPPR2;LPPR2	Body;Body	LPPR2 (+6049)	EPOR (+22907)	54.5624	4.0439	51.3141	4.79857
	149	cg09288218	chr 12: 130554977	0.0245778	0.00045124	0.560325	3.50815	LOC100190940	-28090			TMEM132D (-166766)	FZD10 (-92026)	59.0468	3.55642	62.9627	4.56124
	150	cg08550407	chr 19: 15724798	-0.0259099	0.000934612	0.638766	-3.3095	CYP4F8	-1230	CYP4F8	TSS1500	CYP4F8 (-1230)		27.4671	3.18667	24.7024	3.79942
	151	cg02578559	chr 3: 39446481	0.025051	0.000627895	0.60378	3.41927	RPSA	-1722			RPSA (-1722)		56.1629	4.82296	58.679	3.49352
	152	cg13078926	chr 19: 56660055	0.033493	0.00213469	0.702567	3.07082	ZNF444	7521	ZNF444	Body	GALP (-27333)	ZNF444 (+7521)	40.4873	5.34262	43.7925	5.66958
	153	cg17255125	chr 17: 75634052	-0.0239449	0.000237501	0.516726	-3.67537	LOC100507351	91030			TNRC6C (-366265)	SEPT9 (+356561)	67.6703	3.90803	65.9856	3.83649
	154	cg07554478	chr 3: 113492074	0.0240293	0.0002872	0.539827	3.62658	ATP6V1A	26209	ATP6V1A	5'UTR	GRAMD1C (-65606)	ATP6V1A (+26209)	23.2716	3.00407	25.129	2.85104
	155	cg03559880	chr 6: 105310709	0.0267202	0.00124881	0.660798	3.22749	HACE1	-2915			HACE1 (-2916)		25.6735	5.26674	27.0606	4.23546
	156	cg13773148	chr 9: 136923109	0.0239456	0.000281094	0.538561	3.63213	BRD3	10032	BRD3	5'UTR	VAV2 (-65664)	BRD3 (+10031)	42.1771	3.51373	44.3093	4.02429
	157	cg01892689	chr 8: 97657072	0.0280185	0.00153086	0.671289	3.16877	PGCP	-426	PGCP	TSS1500	PGCP (-426)		49.8902	3.44126	53.1459	4.21586
	158	cg26391794	chr 13: 49323899	-0.0254383	0.000842305	0.632285	-3.33851	CYSLTR2	42946			FNDC3A (-226148)	CYSLTR2 (+42947)	54.2034	6.04664	51.6696	6.42695
	160	cg02835301	chr 3: 11609216	0.0330332	0.00214852	0.702567	3.06889	VGLL4	1182	VGLL4;VGLL4;VGLL4;VGLL4	Body;Body;Body;Body	VGLL4 (+76181)	ATG7 (+295207)	32.8319	4.19539	34.994	5.22667
	159	cg16548265	chr 16: 30435302	0.0273958	0.00142501	0.668622	3.18954	DCTPP1	6071	DCTPP1	3'UTR	DCTPP1 (+6070)	ZNF771 (+16568)	18.5694	3.21629	21.0978	4.11006
	161	cg20876525	chr 6: 169273382	0.0292095	0.00175326	0.687028	3.12913	SMOC2	255461			THBS2 (+380754)	SMOC2 (+431552)	35.2111	4.83127	38.3502	6.31798
	162	cg09410512	chr 2: 224564400	-0.0263669	0.00119132	0.656841	-3.24095	SCG2	-97183			SCG2 (-97184)	AP1S3 (+137918)	47.0035	3.90216	45.5513	4.63137
	163	cg27305303	chr 2: 26781231	-0.0231178	1.03341e-05	0.256374	-4.41006	OTOF	335	OTOF	Body	OTOF (+334)		54.023	2.1254	51.5734	3.08032
	164	cg17929042	chr 7: 70200532	0.0270934	0.00141739	0.668622	3.19109	AUTS2	-30715	AUTS2;AUTS2	Body;Body	WBSCR17 (-397256)		25.0892	3.63881	27.7797	4.35992
	165	cg15086474	chr 7: 1102428	-0.0245139	0.00058187	0.592363	-3.43993	GPR146	5288	C7orf50;C7orf50;C7orf50	Body;Body;Body	GPER (-25294)	GPR146 (+5288)	24.8815	4.07471	21.7558	2.92734
	166	cg10160939	chr 10: 45360880	-0.0249064	0.000743933	0.609064	-3.37285	TMEM72	-45883			CXCL12 (-480336)	TMEM72 (-45883)	44.9589	3.65232	43.3848	3.95476
	167	cg13240326	chr 12: 131496071	0.0249725	0.000763244	0.609064	3.36579	AX748157	16286	GPR133	Body	SFSWAP (-699563)	GPR133 (+57620)	18.9176	4.23923	20.8777	3.62663
	168	cg04337594	chr 11: 952928	0.0231335	5.06594e-05	0.382791	4.05256	AP2A2	-19133	AP2A2	Body	AP2A2 (+27120)	MUC6 (+83777)	50.9816	4.36343	53.764	4.08858
	169	cg05872923	chr 17: 7461260	0.0262195	0.0012168	0.658859	3.23491	TNFSF13	-348	TNFSF13;TNFSF13;TNFSF12-TNFSF13;TNFSF13	TSS1500;TSS1500;Body;TSS1500	SENP3 (-4048)		69.5298	5.25817	72.8279	3.71349
	170	cg23441248	chr 15: 50140549	-0.0374494	0.00255496	0.718869	-3.01676	ATP8B4	28178			ATP8B4 (+270869)	FGF7 (+425175)	36.1814	6.63103	31.967	4.15157
	171	cg14198768	chr 9: 89109504	-0.0276009	0.00159448	0.673104	-3.15692	ZCCHC6	-140102			ZCCHC6 (-140103)	GAS1 (+452599)	23.5192	3.90468	20.8643	4.1118
	172	cg14576436	chr 2: 223917872	0.0393842	0.0026507	0.721321	3.00559	KCNE4	324	KCNE4	Body	KCNE4 (+1011)	SCG2 (+549344)	49.0451	6.15742	52.9454	6.28597
	173	cg00075967	chr 15: 74495354	-0.0262519	0.00128049	0.660798	-3.22032	HP11097	13	STRA6;STRA6;STRA6;STRA6;STRA6;STRA6	5'UTR;5'UTR;1stExon;5'UTR;TSS200;5'UTR	STRA6 (-135)		30.1129	5.10272	26.9698	4.38013
	174	cg00030523	chr 12: 97885353	-0.0242648	0.000584333	0.592702	-3.43878	MIR1251	-333	RMST;MIR1251	Body;TSS1500	NEDD1 (+584353)	SLC9A7P1 (+965569)	24.4785	4.23426	21.6038	3.33948
	175	cg10753283	chr 13: 114912269	-0.0233652	0.000211592	0.493732	-3.70476	RASA3	-14174			CDC16 (-88092)	RASA3 (-14175)	27.5846	2.54975	24.8093	3.0797
	176	cg20802942	chr 17: 5185005	-0.0282477	0.00178599	0.687028	-3.12369	RABEP1	-552	RABEP1;RABEP1	TSS1500;TSS1500	RABEP1 (-552)		47.9612	4.62835	46.1884	4.32577
	177	cg08364860	chr 10: 27827130	-0.0262161	0.00128706	0.661203	-3.21885	RAB18	33882	RAB18	3'UTR	RAB18 (+33882)	MKX (+207647)	30.4787	5.97502	27.0457	3.98752
	178	cg24686845	chr 12: 94698752	-0.0233573	0.000233545	0.516726	-3.67966	PLXNC1	42456	PLXNC1	Body	CCDC41 (+155011)	PLXNC1 (+156254)	23.6019	3.40712	21.3711	3.85937
	179	cg26452584	chr 10: 91227359	0.0256626	0.00113952	0.649005	3.2536	SLC16A12	-30798	SLC16A12	5'UTR	IFIT5 (+53035)	SLC16A12 (+67953)	27.2478	4.72324	28.375	4.36632
	180	cg26981047	chr 2: 10535668	-0.0259245	0.00125255	0.660798	-3.22663	HPCAL1	26779	HPCAL1;HPCAL1	5'UTR;5'UTR	ODC1 (+52784)	HPCAL1 (+92629)	28.7593	5.62541	25.1069	4.84135
	181	cg00333583	chr 15: 85589274	-0.0303327	0.00214381	0.702567	-3.06955	PDE8A	-16453	PDE8A;PDE8A	Body;Body	AKAP13 (-334596)	PDE8A (+64070)	36.5516	5.90658	33.3067	4.38705
	182	cg05800983	chr 6: 34102530	0.0277671	0.00176661	0.687028	3.1269	GRM4	-894	GRM4	TSS1500	GRM4 (-895)		25.1115	3.74014	27.6323	4.14409
	183	cg05067427	chr 16: 54227914	-0.0264862	0.00144594	0.668622	-3.18532	IRX3	92464			IRX3 (+92463)	FTO (+490040)	70.4216	3.18821	69.1397	4.83447
	184	cg06592065	chr 5: 1084523	0.0246532	0.000852967	0.632818	3.33501	MIR4635	-21434	SLC12A7	Body	SLC12A7 (+27648)	NKD2 (+75356)	39.1519	5.51603	41.4493	6.1463
	185	cg09100373	chr 8: 127708756	-0.0231875	0.00021288	0.493732	-3.70322	FAM84B	-138045			POU5F1B (-719100)	FAM84B (-138046)	22.5631	3.11488	20.1094	2.66354
	186	cg14585167	chr 2: 709329	0.0257455	0.00126876	0.660798	3.22295	TMEM18	-31890			SNTG2 (-237224)	TMEM18 (-31891)	56.0732	4.42338	57.6864	4.44941
	187	cg24079171	chr 3: 122877810	0.0328849	0.00250064	0.718869	3.02326	SEC22A	-42963	PDIA5;PDIA5	Body;Body	SEC22A (-42963)	PDIA5 (+91955)	23.6348	5.25223	26.0891	5.0837
	188	cg25323005	chr 8: 1779117	0.0269956	0.00164604	0.678813	3.14762	ARHGEF10	6969	ARHGEF10	5'UTR	MYOM2 (-214040)	ARHGEF10 (+6969)	21.5689	3.40199	23.7321	4.43951
	189	cg09398845	chr 4: 123653705	-0.0239467	0.000578988	0.592363	-3.44127	CETN4P	-92	LOC729338;BBS12	TSS200;TSS200	BBS12 (-151)		89.4299	3.28581	86.9888	4.09842
	190	cg02431972	chr 16: 89023488	0.0336325	0.00255787	0.718869	3.01641	CBFA2T3	-15271	CBFA2T3	Body	PABPN1L (-90421)	CBFA2T3 (+20015)	43.1816	4.32361	46.5595	5.24446
	191	cg05121497	chr 18: 60186078	-0.0258151	0.00130587	0.661345	-3.21469	ZCCHC2	-4579			ZCCHC2 (-4579)		24.8222	3.46547	21.6958	3.79939
	192	cg11377642	chr 1: 245534889	0.0258765	0.00132886	0.662924	3.20967	Mir_548	-1170	KIF26B	Body	KIF26B (+216603)		13.9405	3.14926	15.7031	3.94913
	193	cg04332422	chr 14: 81852444	0.0242828	0.000754711	0.609064	3.36889	STON2	12480	STON2	Body	GTF2A1 (-165151)	STON2 (+12479)	43.5808	3.70844	46.0023	4.42356
	194	cg18634709	chr 4: 6907396	0.0239834	0.000614361	0.600137	3.42519	TBC1D14	-3774			TBC1D14 (-4098)		34.5049	3.5551	36.6807	3.13277
	195	cg19822640	chr 17: 66203829	0.0417319	0.00290256	0.727392	2.97787	LOC440461	9029			AMZ2 (-40315)	KPNA2 (+171982)	48.4593	7.45811	51.2326	5.87736
	196	cg09607452	chr 15: 50193161	0.0280958	0.00196673	0.70054	3.09521	ATP8B4	1319	ATP8B4	Body	ATP8B4 (+218257)	FGF7 (+477787)	39.0863	6.19888	41.451	6.07044
	197	cg18888814	chr 13: 100300543	0.0266795	0.0016125	0.674938	3.15364	MIR4306	5231	CLYBL	Body	CLYBL (+41625)	ZIC5 (+323634)	34.4587	3.39403	37.1697	4.61352
	198	cg13229867	chr 3: 151058783	-0.0283456	0.00202594	0.702567	-3.0864	P2RY12	-198	MED12L;P2RY12;P2RY12	Body;TSS200;5'UTR	P2RY12 (-199)		33.406	4.47315	29.8929	4.21262
	199	cg10803871	chr 5: 174082675	0.0336555	0.00263015	0.720619	3.00795	MSX2	-68899			MSX2 (-68899)	HMP19 (+609952)	43.0702	4.83962	45.1052	6.85264
	200	cg02221114	chr 11: 86628093	0.0284144	0.0020544	0.702567	3.08225	FZD4	38347			FZD4 (+38346)	PRSS23 (+116603)	17.6835	2.7723	20.4317	4.78226
	201	cg02323958	chr 8: 130930889	-0.0239106	0.000638526	0.60378	-3.4147	FAM49B	21111	FAM49B	5'UTR	GSDMC (-131756)	ASAP1 (+525016)	45.9692	8.37422	43.7499	7.67018
	202	cg21683390	chr 18: 13259088	0.0229784	0.000212317	0.493732	3.70389	C18orf1	40303	C18orf1;C18orf1	5'UTR;5'UTR	C18orf1 (+40303)	FAM210A (+467502)	39.3612	3.55982	42.5237	5.35188
	203	cg01850179	chr 19: 10340795	0.0229343	0.000209605	0.493732	3.70715	MIR4322	-293	S1PR2	5'UTR	DNMT1 (-35041)	S1PR2 (+1152)	82.16	3.35259	84.8205	2.38366
	204	cg27583010	chr 16: 30198505	-0.0257037	0.00139124	0.668622	-3.19646	CORO1A	503	CORO1A;LOC606724	Body;TSS1500	SLX1B (-6658)	CORO1A (+3775)	47.6656	4.10446	43.4004	6.37339
	205	cg12893374	chr 5: 95555970	-0.0237517	0.000610617	0.600137	-3.42685	MIR583	141129			ELL2 (-258196)	PCSK1 (+213014)	34.418	3.59049	31.6951	3.75508
	206	cg10287786	chr 11: 117666000	-0.0231968	0.000367956	0.559119	-3.56206	DSCAML1	1976	DSCAML1	Body	DSCAML1 (+1975)	CEP164 (+467430)	66.2437	4.22749	63.9511	6.52795
	207	cg23371476	chr 2: 105877824	-0.0229858	0.000263495	0.530467	-3.64877	LOC644617	4866			GPR45 (+19625)	TGFBRAP1 (+68323)	20.9604	3.85545	18.9824	2.57627
	208	cg09804503	chr 1: 33231313	-0.0292013	0.00222024	0.703755	-3.05907	KIAA1522	79	KIAA1522	Body	SYNC (-62953)	S100PBP (-51862)	61.244	5.50663	58.9335	6.9824
	209	cg07516511	chr 16: 2907819	-0.034367	0.00276935	0.72174	-2.99224	PRSS22	352	PRSS22	Body	PRSS22 (+351)		71.8398	4.183	69.2171	6.09997
	210	cg00779615	chr 10: 89792317	-0.0225793	6.07712e-05	0.389806	-4.0098	AK130076	85393			KLLN (-169124)	RNLS (+550764)	20.2602	3.24497	17.3889	2.34457
	211	cg21415424	chr 6: 37503074	-0.0224237	1.40568e-05	0.256374	-4.34297	MIR4462	20124			CCDC167 (-35375)	MDGA1 (+162691)	34.2417	3.98938	31.3963	2.64462
	212	cg03882270	chr 4: 3384736	-0.0226854	0.000118056	0.429014	-3.85013	RGS12	-2146	RGS12;RGS12;RGS12	Body;Body;Body	HGFAC (-58989)	RGS12 (+68863)	29.3138	3.24013	27.0774	3.07208
	213	cg13521842	chr 14: 101036202	-0.0252611	0.00130751	0.661345	-3.21433	BEGAIN	-71	BEGAIN	TSS200	BEGAIN (-1796)		57	3.72812	56.1132	4.91453
	214	cg23668907	chr 12: 38447636	-0.0467557	0.00317788	0.731401	-2.94999	ALG10B	-262920			ALG10B (-262920)		35.7999	7.07647	30.8951	6.37609
	215	cg17582444	chr 3: 179110334	-0.0257475	0.00149462	0.669313	-3.17573	GNB4	24010	MFN1	3'UTR	MFN1 (+44855)	GNB4 (+59036)	35.9475	5.62446	32.593	3.60938
	216	cg22147163	chr 11: 64594647	0.0316338	0.00262405	0.720619	3.00866	MEN1	-15881	CDC42BPG	Body	MEN1 (-16460)	CDC42BPG (+17393)	20.5946	3.95876	23.2115	4.94191
	217	cg17054006	chr 2: 183107046	-0.0304061	0.00251207	0.718869	-3.02188	PDE1A	-273	PDE1A;PDE1A	Body;Body	PPP1R1C (+256496)	PDE1A (+280206)	34.4905	4.48762	30.9931	4.81681
	218	cg11315991	chr 7: 601283	0.0269311	0.0019339	0.70054	3.1002	PRKAR1B	39938	PRKAR1B;PRKAR1B;PRKAR1B;PRKAR1B;PRKAR1B;PRKAR1B	Body;Body;Body;Body;Body;Body	HEATR2 (-165054)	PDGFA (-41803)	15.2728	2.05323	16.9571	5.13279
	219	cg01099590	chr 5: 176292536	0.0240787	0.000911424	0.638766	3.31653	UNC5A	2912	UNC5A	Body	HK3 (+33796)	UNC5A (+54977)	13.4993	2.3627	15.9105	3.80738
	220	cg09004195	chr 2: 222323493	0.0226173	0.00019744	0.493368	3.72227	EPHA4	113508	EPHA4	Body	EPHA4 (+113516)		28.8517	2.89859	29.7866	3.93394
	221	cg21191514	chr 11: 2187921	-0.0394834	0.0031864	0.731401	-2.94916	TH	1488	TH;TH;TH	Body;Body;Body	INS-IGF2 (-5483)	TH (+5113)	70.9089	5.90538	68.4205	6.39379
	222	cg24792113	chr 4: 69313197	-0.0237076	0.000798788	0.615145	-3.35321	TMPRSS11E	31	TMPRSS11E;TMPRSS11E	1stExon;5'UTR	TMPRSS11E (+31)		34.3518	3.78655	31.9438	3.06575
	223	cg25164009	chr 13: 61490935	-0.0429559	0.0032854	0.733823	-2.93969	AK097816	-199			PCDH20 (+498719)	TDRD3 (+519509)	28.0719	8.68169	23.8972	5.95094
	224	cg21452411	chr 16: 2908211	-0.0283403	0.00232851	0.705938	-3.04478	PRSS22	-40	PRSS22	TSS200	PRSS22 (-41)		70.3847	3.39788	68.4763	5.19671
	225	cg14718396	chr 15: 50274021	-0.0292908	0.00251237	0.718869	-3.02185	ATP8B4	-79541	ATP8B4	Body	ATP8B4 (+137397)	FGF7 (+558647)	28.7645	6.06345	24.8776	4.94665
	226	cg26979829	chr 9: 107289385	-0.0229698	0.000477495	0.579127	-3.49307	OR13C4	105	OR13C4	1stExon	OR13C4 (+104)		23.608	3.22434	21.2798	2.78198
	227	cg05093315	chr 11: 18127958	0.0230418	0.000539867	0.592363	3.46015	SAAL1	-320	SAAL1	TSS1500	SAAL1 (-321)		57.7581	3.92943	59.094	4.70069
	228	cg23875319	chr 10: 126296314	-0.0227708	0.000378344	0.559119	-3.55475	LHPP	2545	LHPP;LHPP	Body;Body	FAM53B (+136615)	LHPP (+145974)	36.9129	4.43932	33.4897	4.24022
	229	cg00542992	chr 5: 141595654	0.0235834	0.000795323	0.613793	3.35442	SPRY4	99019			NDFIP1 (+107331)	SPRY4 (+108965)	57.0905	3.48419	60.7401	4.55186
	230	cg05611719	chr 17: 73902048	0.0245731	0.00127573	0.660798	3.22138	MRPL38	-867	MRPL38	TSS1500	MRPL38 (-868)		38.6843	3.16738	41.1782	3.67148
	231	cg01071811	chr 20: 42143080	0.0231992	0.000631991	0.60378	3.4175	L3MBTL1	5	L3MBTL;L3MBTL;L3MBTL;L3MBTL	5'UTR;1stExon;1stExon;5'UTR	SGK2 (-51656)	L3MBTL1 (+6761)	55.8724	3.22858	58.0136	3.41655
	232	cg10807889	chr 12: 81156109	-0.0261397	0.00185782	0.699357	-3.11207	BC037383	-823			MYF5 (+45402)	LIN7A (+175584)	26.9322	5.13185	23.2638	4.13337
	233	cg18739089	chr 2: 7998290	-0.0256777	0.00170343	0.68278	-3.13759	LOC339788	118687			ID2 (-823822)	RNF144A (+940768)	33.7291	3.49353	31.3116	4.26431
	234	cg02665650	chr 6: 34984838	-0.0267904	0.00207869	0.702567	-3.07875	ANKS1A	44460	ANKS1A	Body	TCP11 (+124348)	ANKS1A (+127801)	54.8806	4.63803	51.6457	5.36821
	235	cg04414629	chr 4: 80329633	-0.0270944	0.00215525	0.702575	-3.06796	GK2	-261	GK2	TSS1500	GK2 (-262)		27.5493	5.54963	24.3874	4.52912
	236	cg01232121	chr 8: 58177661	-0.0290812	0.00257384	0.718869	-3.01452	LOC286177	3877			FAM110B (-729451)	IMPAD1 (-271232)	28.0774	4.08942	24.6341	4.37615
	237	cg26708123	chr 7: 155348314	0.0273694	0.00224848	0.705938	3.05528	CNPY1	-21775			RBM33 (-88888)	EN2 (+97491)	37.8961	4.87302	40.5059	5.32912
	238	cg22914338	chr 19: 14376960	-0.0301257	0.00271618	0.721596	-2.99816	LPHN1	-59963			CD97 (-114995)	LPHN1 (-59964)	56.229	4.41716	53.2589	5.08991
	239	cg26963367	chr 15: 89157841	-0.0268727	0.00213723	0.702567	-3.07047	MIR3529	-2686			DET1 (-67930)	AEN (-6685)	57.7929	4.20936	56.1403	4.43775
	240	cg17714987	chr 4: 89445475	0.0278014	0.00234833	0.706246	3.04223	PIGY	-520	PIGY;PIGY	TSS1500;TSS1500	PIGY (-2536)	PIGY (-521)	63.0232	9.26621	65.9758	6.11268
	241	cg09911316	chr 6: 3610600	-0.0219327	1.23487e-05	0.256374	-4.37134	PXDC1	141646			SLC22A23 (-153808)	PXDC1 (+141645)	32.264	3.46554	30.0442	3.33467
	242	cg21578921	chr 4: 4393416	-0.0221966	0.000134367	0.45547	-3.81831	D4S234E	5833	D4S234E;D4S234E	Body;Body	D4S234E (+5833)	STX18 (+150358)	42.8736	3.16393	40.9738	3.44056
	243	cg16331632	chr 14: 60783238	-0.0223069	0.000223274	0.506002	-3.69111	JA429117	-10361			PPM1A (+70769)	C14orf39 (+169525)	29.7568	2.64844	27.7177	3.19349
	244	cg16640973	chr 19: 19644143	-0.0247846	0.00144413	0.668622	-3.18568	YJEFN3	4474	YJEFN3	Body	CILP2 (-4930)		29.2697	4.1046	26.2574	4.41339
	245	cg23105419	chr 2: 43496213	-0.0257055	0.00184298	0.696682	-3.11444	LOC100129726	41864	THADA;THADA	Body;Body	ZFP36L2 (-42469)	THADA (+326971)	36.7787	4.71288	35.0282	5.40153
	246	cg02327189	chr 7: 57830004	-0.0375351	0.00333727	0.73572	-2.93483	L37717	131359			ZNF716 (+320122)		60.2206	5.12526	57.7604	6.78845
	247	cg14542554	chr 14: 61122327	0.0287484	0.00260354	0.720421	3.01104	SIX1	-6172			SIX1 (-6173)	SIX4 (+68524)	54.2579	5.12836	55.6061	5.30695
	248	cg00938087	chr 17: 63186926	-0.0250559	0.00157074	0.671289	-3.16129	RGS9	2105	RGS9;RGS9;RGS9	Body;Body;Body	RGS9 (+53471)	AXIN2 (+370813)	32.0447	4.01241	28.8136	4.44336
	249	cg21184216	chr 5: 102598034	-0.0268029	0.00225063	0.705938	-3.055	C5orf30	2910	C5orf30	5'UTR	PPIP5K2 (+133025)	NUDT12 (+300455)	46.1387	4.32065	44.1786	4.83003
	250	cg00666842	chr 2: 88366145	-0.0238256	0.00114166	0.649005	-3.25307	SMYD1	-1153	SMYD1	TSS1500	SMYD1 (-1153)		33.7421	2.6794	31.6451	3.7096
	251	cg22984256	chr 9: 139238444	0.0226841	0.000532103	0.592363	3.46405	GPSM1	-9064	GPSM1	Body	GPSM1 (+16513)	DNLZ (+19796)	39.4151	2.76282	40.8378	3.76076
	252	cg21112954	chr 14: 75330798	-0.030627	0.0029583	0.727483	-2.97204	PROX2	-261	PROX2	TSS1500	PROX2 (-262)		52.0307	5.64598	48.4962	4.75108
	253	cg15363134	chr 18: 77161214	0.0245618	0.00149567	0.669313	3.17552	NFATC1	889	NFATC1;NFATC1;NFATC1;NFATC1;NFATC1	Body;5'UTR;Body;Body;Body	NFATC1 (+889)		29.1774	3.63421	32.8342	5.38095
	254	cg04104966	chr 8: 143505825	0.0351977	0.00337428	0.737375	2.93141	TSNARE1	-21282			BAI1 (-39551)	TSNARE1 (-21283)	25.1272	4.4688	28.5839	5.71142
	255	cg27620871	chr 16: 2908219	-0.0263747	0.00216521	0.703755	-3.06658	PRSS22	-48	PRSS22	TSS200	PRSS22 (-49)		81.621	2.87494	80.2024	5.14705
	256	cg14703024	chr 11: 95631666	-0.0218255	5.26323e-05	0.382791	-4.04362	MTMR2	25294	MTMR2;MTMR2;MTMR2;MTMR2	5'UTR;Body;Body;5'UTR	MTMR2 (+25704)	CEP57 (+108042)	22.6222	3.30067	20.2493	3.16462
	257	cg11062167	chr 2: 46791080	0.0222928	0.000341152	0.559119	3.58186	BC048424	16294	RHOQ	Body	RHOQ (+21214)	PIGF (+53170)	20.3636	2.55455	22.4058	2.91553
	258	cg11298446	chr 10: 119749726	0.0247914	0.00161107	0.674938	3.1539	RAB11FIP2	56388			RAB11FIP2 (+56387)	EMX2 (+447771)	22.0905	4.66356	24.3344	3.34085
	259	cg17093684	chr 7: 4838902	-0.0315112	0.00312572	0.731401	-2.9551	RADIL	4797	RADIL	3'UTR	KIAA0415 (+23641)	PAPOLB (+62722)	37.7345	5.04989	35.1505	5.6389
	260	cg17212500	chr 8: 94750983	0.0255975	0.00196851	0.70054	3.09494	C8orf39	-1355	C8orf39;RBM12B	TSS1500;5'UTR	C8orf83 (-772612)	RBM12B (+2240)	19.528	3.8271	21.0663	4.56159
	261	cg01440556	chr 2: 242165309	-0.0218028	7.28806e-05	0.395399	-3.96668	DKFZp686L08115	35774			ANO7 (+37386)	HDLBP (+46936)	28.2113	2.83336	25.2118	2.97372
	262	cg21293216	chr 1: 24469768	-0.0237328	0.0011718	0.653635	-3.24566	IL22RA1	7	IL22RA1	TSS200	IL22RA1 (+6)		47.3682	3.32747	45.0876	3.20464
	263	cg00688840	chr 14: 106363051	-0.0235793	0.00110873	0.647194	-3.26138	KIAA0125	7072			DKFZp686O16217 (-32206)	ADAM6 (+75306)	63.5685	3.38463	62.67	4.63436
	264	cg10825234	chr 4: 1041061	-0.0254317	0.0019325	0.70054	-3.10041	AK124578	15683			FGFRL1 (+35302)	RNF212 (+66290)	34.4716	4.70475	31.8595	4.01099
	265	cg01924223	chr 8: 42033498	-0.0215677	8.57265e-07	0.159006	-4.92186	PLAT	17231	PLAT;PLAT	3'UTR;3'UTR	AP3M2 (+23035)	PLAT (+31695)	16.9517	1.81423	14.7701	2.12953
	266	cg13569486	chr 11: 8290738	-0.0226745	0.000637079	0.60378	-3.41532	LMO1	-556			LMO1 (-5333)	STK33 (+324764)	69.5201	3.85476	67.272	4.646
	267	cg02809611	chr 16: 3253368	-0.0215562	2.31785e-06	0.180092	-4.72353	OR1F1	-878	OR1F1	TSS1500	OR1F1 (-878)		37.5551	2.2592	35.9184	2.89096
	268	cg00151906	chr 1: 154548273	-0.0216671	8.72158e-05	0.395399	-3.92365	CHRNB2	8017	CHRNB2	Body	CHRNB2 (+8017)	ADAR (+32450)	31.601	4.11355	28.4598	4.15027
	269	cg16649577	chr 8: 11646810	0.0237596	0.00129302	0.661345	3.21752	FDFT1	-6271			FDFT1 (-13379)	NEIL2 (+19639)	21.9181	2.8855	24.071	3.63339
	270	cg26800786	chr 11: 105922059	-0.0245213	0.0016561	0.678813	-3.14584	AASDHPPT	-26232	KBTBD3;KBTBD3	3'UTR;3'UTR	KIAA1826 (-29106)	AASDHPPT (-26232)	38.1527	5.08279	35.763	5.11024
	271	cg26248114	chr 1: 56901693	0.0235422	0.00120166	0.656841	3.23849	PPAP2B	143564			PPAP2B (+143563)	AK127270 (+854984)	64.941	6.16881	66.4676	5.42089
	272	cg03155430	chr 20: 62035791	0.0354539	0.00365746	0.743225	2.90629	KCNQ2	-2421			CHRNA4 (-43097)	KCNQ2 (+68201)	32.8942	5.09622	35.8719	6.08054
	273	cg18610616	chr 10: 68039681	0.0259011	0.00226836	0.705938	3.05264	SnoU40	-214775	CTNNA3;CTNNA3	Body;Body	LRRTM3 (-646110)		24.7934	3.28605	26.2647	5.05382
	274	cg19707735	chr 1: 158969712	-0.022366	0.000599053	0.599407	-3.43204	IFI16	-45			IFI16 (-9969)	PYHIN1 (+68376)	80.238	3.19567	77.7274	3.35148
	275	cg12636421	chr 7: 79998795	-0.021842	0.000272878	0.53541	-3.63977	CD36	-95			GNAT3 (+142446)	GNAI1 (+234656)	25.3253	3.04205	23.4784	3.07775
	276	cg05754179	chr 11: 125985044	0.023264	0.00114814	0.650501	3.25146	CDON	-51857			CDON (-51858)	RPUSD4 (+96542)	53.7962	3.51316	55.603	3.24695
	277	cg14526671	chr 4: 28231021	-0.0284084	0.00296695	0.727483	-2.97114	Metazoa_SRP	-481798			NONE		29.1109	4.84868	26.3799	3.49849
	278	cg09816756	chr 4: 69047758	-0.024424	0.00174553	0.687028	-3.13043	FTLP10	-251	LOC100130017	TSS1500	TMPRSS11F (-52172)	TMPRSS11BNL (+36039)	25.145	4.03873	23.1285	3.34593
	279	cg00978822	chr 5: 54467244	-0.0260659	0.00235151	0.706246	-3.04182	MIR449B	-674	MIR449B;MIR449A;CDC20B;CDC20B;CDC20B	TSS1500;TSS1500;Body;Body;Body	GPX8 (+11261)	IDAS (+55898)	31.7083	4.45231	28.3737	3.44537
	280	cg13906823	chr 1: 161008824	-0.033268	0.00356487	0.742256	-2.9143	TSTD1	-50	TSTD1;TSTD1;TSTD1	TSS200;TSS200;TSS200	F11R (-17692)	USF1 (+6932)	64.9137	5.21397	62.4025	5.2052
	281	cg01685893	chr 11: 112048262	-0.0251309	0.00203925	0.702567	-3.08446	BCO2	1174	BCO2;BCO2	5'UTR;Body	PTS (-48825)	BCO2 (+2055)	31.0917	3.8681	28.9498	4.11771
	283	cg12438576	chr 11: 89232216	-0.0258955	0.00233051	0.705938	-3.04452	NOX4	-6829	NOX4	5'UTR	FOLH1B (-160248)	NOX4 (-7564)	29.9199	3.72094	26.8208	4.21608
	284	cg13816428	chr 14: 21625173	-0.0251369	0.00205716	0.702567	-3.08185	OR5AU1	-989	OR5AU1	TSS1500	OR5AU1 (-990)		49.1718	3.8209	46.6738	4.19589
	282	cg21805950	chr 8: 78031864	0.0283838	0.00300639	0.727483	2.96708	PEX2	-118584			PEX2 (-118585)		46.2319	4.60592	49.1522	3.6139
	285	cg11979621	chr 7: 155562188	-0.0215044	9.33363e-05	0.395399	-3.90729	RBM33	22909	RBM33	Body	SHH (+42778)	RBM33 (+124986)	41.2471	4.25448	38.2515	4.41668
	286	cg13384212	chr 6: 166190016	-0.0250114	0.00202686	0.702567	-3.08627	PDE10A	-114428			PDE10A (-114429)	T (+392114)	30.2175	4.21578	27.9775	3.77104
	287	cg20602843	chr 10: 95351603	-0.0216227	0.000181617	0.493368	-3.7433	RBP4	9390	RBP4	3'UTR	RBP4 (+9389)	O3FAR1 (+25182)	38.3179	3.06082	36.3844	2.49472
	288	cg19865564	chr 17: 39728263	-0.0215194	9.96234e-05	0.395399	-3.89151	KRT9	47	KRT9;KRT9	5'UTR;1stExon	KRT9 (+46)		37.2361	3.33495	34.4716	3.49694
	289	cg21879725	chr 19: 45412647	0.02281	0.000966727	0.638766	3.30004	APOE	3609	APOE	3'UTR	APOC1 (-5273)	APOE (+3609)	38.7768	4.5163	39.7315	5.46716
	290	cg24804765	chr 19: 51524658	-0.0223818	0.000696675	0.607351	-3.39088	KLK10	-1227	KLK10;KLK10	TSS1500;TSS1500	KLK10 (-1228)		72.2233	2.62559	70.305	3.01103
	291	cg12179884	chr 4: 2066003	0.0234146	0.0013221	0.661816	3.21114	NAT8L	4765	NAT8L	3'UTR	NAT8L (+4765)	POLN (+164966)	49.673	5.12994	51.4059	5.97993
	292	cg12233487	chr 20: 2517085	-0.0221597	0.0005698	0.592363	-3.4456	TMC2	-167	TMC2	TSS200	TMC2 (-167)		34.8791	4.45373	31.9951	4.39753
	293	cg09282201	chr 1: 3155161	0.0237602	0.00150565	0.67102	3.17359	MIR4251	110623	PRDM16;PRDM16	Body;Body	ARHGEF16 (-215985)	PRDM16 (+169420)	49.4401	3.54381	51.591	3.98495
	294	cg16255541	chr 7: 2458294	0.0218952	0.000418027	0.560325	3.52843	CHST12	-13980	CHST12	5'UTR	LFNG (-101184)	CHST12 (+15100)	15.0403	2.23684	16.7648	3.21506
	295	cg02859655	chr 19: 3648642	0.0252301	0.00215172	0.702575	3.06845	C19orf29	-21829	PIP5K1C	Body	C19orf29 (-21830)	PIP5K1C (+51834)	23.0441	2.68859	24.8017	4.61652
	296	cg16711291	chr 3: 193991157	-0.0236748	0.00149278	0.669313	-3.17608	LOC100131551	39436			CPN2 (+80899)	HES1 (+137227)	21.9751	4.01177	20.1279	3.23574
	297	cg13817203	chr 10: 134119936	0.0219125	0.000483479	0.579323	3.48975	STK32C	780	STK32C	Body	STK32C (+1540)	DPYSL4 (+119523)	31.9249	3.64178	33.2422	4.42676
	298	cg20030852	chr 7: 99391506	0.0273501	0.00292534	0.727392	2.97548	CYP3A4	-9695			CYP3A43 (-34129)	CYP3A4 (-9696)	25.5162	4.07769	26.9233	5.08819
	299	cg03703839	chr 16: 87990084	-0.0222328	0.000698939	0.607351	-3.38999	BANP	-3392	BANP;BANP	5'UTR;5'UTR	ZNF469 (-503794)	BANP (+5047)	56.1412	3.16205	54.875	3.34334
	300	cg22930808	chr 3: 122281881	-0.0226956	0.00099728	0.638766	-3.29129	PARP9	1266	PARP9;PARP9;DTX3L;PARP9;PARP9;PARP9;PARP9	5'UTR;5'UTR;TSS1500;5'UTR;5'UTR;5'UTR;5'UTR	DTX3L (-1303)		28.6019	3.45066	26.6305	3.06782
	301	cg12141052	chr 12: 66349603	-0.0293925	0.00331884	0.73389	-2.93655	AK128707	-73782	HMGA2	Body	HMGA2 (+131364)	LLPH (+174929)	52.5083	5.36632	48.3483	4.46388
	302	cg26666107	chr 1: 55505073	-0.0214875	0.000211318	0.493732	-3.70509	PCSK9	-75	PCSK9	TSS200	PCSK9 (-75)		72.0256	3.33535	71.1241	4.36983
	303	cg06908550	chr 1: 222279701	0.0241262	0.00180739	0.688756	3.12018	TRNA_Thr	-358645			DUSP10 (-364186)	HHIPL2 (+441742)	39.888	3.40094	42.2261	4.06528
	304	cg23606171	chr 1: 2559822	-0.0220068	0.000601523	0.599407	-3.43093	MMEL1	1138	MMEL1	Body	MMEL1 (+4658)	FAM213B (+41634)	55.78	2.8603	53.8978	2.81792
	305	cg17888090	chr 1: 71354374	-0.0220762	0.000644421	0.60378	-3.41219	ZRANB2-AS1	-157814	PTGER3;PTGER3;PTGER3;PTGER3;PTGER3;PTGER3	Body;Body;Body;Body;3'UTR;Body	PTGER3 (+159116)	CTH (+477474)	29.5236	2.89763	27.0293	2.97085
	306	cg27542767	chr 6: 40253980	-0.0211462	1.75608e-05	0.257948	-4.29384	FLJ41649	69765			MOCS1 (-358526)	LRFN2 (+301145)	81.8039	2.48269	79.8358	2.16918
	307	cg23863328	chr 10: 49879704	-0.0258198	0.00256943	0.718869	-3.01504	WDFY4	-13216			ARHGAP22 (-66567)	WDFY4 (-13813)	46.8793	3.73681	45.0983	4.51385
	308	cg17818912	chr 5: 68787696	-0.0250043	0.00222818	0.704139	-3.058	OCLN	-422	OCLN	TSS1500	OCLN (-422)		60.3508	3.6861	57.6672	3.57907
	309	cg10111067	chr 11: 3984299	-0.0242444	0.00196201	0.70054	-3.09592	STIM1	-95679	STIM1	Body	RRM1 (-131624)	STIM1 (+107367)	27.5746	4.25115	23.9468	4.53915
	310	cg08831999	chr 22: 22901697	-0.0246023	0.00212135	0.702567	-3.07269	PRAME	-1	LOC648691;PRAME;PRAME;PRAME;PRAME;PRAME	TSS200;TSS200;TSS200;TSS200;TSS200;TSS200	PRAME (-2)		71.4122	3.56131	69.5767	3.54538
	311	cg13553936	chr 13: 114202067	0.0306946	0.00359805	0.742739	2.91141	TFDP1	-36935	TMCO3	Body	TFDP1 (-36988)	TMCO3 (+56760)	37.5681	4.27327	40.1778	5.66225
	312	cg10505257	chr 16: 4731639	0.027712	0.00316841	0.731401	2.95091	NUDT16L1	-12054	MGRN1;MGRN1;MGRN1;MGRN1	Body;Body;Body;Body	NUDT16L1 (-12054)	MGRN1 (+56815)	36.2351	3.79226	38.9495	4.59892
	313	cg11740103	chr 7: 150020945	-0.0212884	0.000176952	0.493368	-3.74983	ACTR3C	-187	ACTR3C;LRRC61;LRRC61	TSS200;5'UTR;5'UTR	ACTR3C (-188)		76.4113	3.42918	75.3977	3.22903
	314	cg07648740	chr 7: 154864630	-0.0238062	0.00178201	0.687028	-3.12435	LOC100128264	-1363	HTR5A	Body	INSIG1 (-224855)	HTR5A (+2085)	44.9932	3.65194	43.2819	3.53174
	315	cg08861404	chr 19: 51670315	-0.0214623	0.000328687	0.559119	-3.59157	SIGLECP3	-269	SIGLECP3	TSS1500	CD33 (-58019)	SIGLEC7 (+24758)	39.6685	3.02434	37.8563	2.67806
	316	cg26984805	chr 10: 71176501	0.0217645	0.000564438	0.592363	3.44815	TACR2	173	TACR2;TACR2	1stExon;5'UTR	TACR2 (+172)		36.65	3.3506	39.0032	4.94164
	317	cg09347160	chr 4: 83513063	-0.0256339	0.00260621	0.720421	-3.01073	C4orf11	29527			TMEM150C (-29938)	SCD5 (+206946)	50.9774	4.6959	48.5185	5.75371
	318	cg05824218	chr 17: 38499096	-0.0218475	0.000626123	0.60378	-3.42004	RARA	826	RARA;RARA;RARA;RARA	1stExon;Body;Body;Body	GJD3 (+21848)	RARA (+33674)	75.5488	2.6761	74.2155	4.45438
	319	cg21178689	chr 9: 138594307	-0.0269493	0.00304692	0.727483	-2.96296	KCNT1	277	KCNT1	Body	SOHLH1 (-2934)	KCNT1 (+277)	45.7051	2.7832	43.3697	4.7528
	320	cg12093976	chr 4: 110833884	0.0217357	0.00056257	0.592363	3.44905	EGF	-155	EGF	TSS200	EGF (-155)		65.2509	3.85223	67.3612	3.54154
	321	cg18779500	chr 2: 168441181	-0.0222789	0.000949187	0.638766	-3.30517	B3GALT1	-234000			B3GALT1 (-234000)	XIRP2 (+696185)	24.8835	3.80514	23.41	3.96976
	322	cg24699021	chr 5: 172305986	0.0216702	0.0005409	0.592363	3.45964	BX648961	12547	ERGIC1	Body	RPL26L1 (-80452)	ERGIC1 (+44764)	60.5569	4.08339	62.065	5.52096
	323	cg22785672	chr 7: 44083650	-0.0237712	0.00187037	0.699357	-3.11008	DBNL	-588	DBNL;DBNL;DBNL	TSS1500;TSS1500;TSS1500	RASA4 (-3429)	DBNL (-588)	53.6407	3.75317	51.8705	4.43924
	324	cg03107235	chr 13: 26586713	0.02187	0.00068802	0.607351	3.39431	SHISA2	38485	ATP8A2	Body	SHISA2 (+38484)	ATP8A2 (+640505)	74.4021	3.46489	77.0685	3.62783
	325	cg06465011	chr 16: 84860871	-0.0251199	0.00247281	0.718337	-3.02665	CRISPLD2	7285	CRISPLD2	5'UTR	CRISPLD2 (+7285)	ZDHHC7 (+184269)	42.2376	3.35736	40.3752	4.01015
	326	cg23549472	chr 18: 43917496	-0.0213857	0.000332815	0.559119	-3.58832	C18orf23	2854	RNF165	Body	RNF165 (+3310)	LOXHD1 (+319499)	48.9596	3.55219	45.9464	5.41173
	327	cg23019936	chr 12: 13903266	-0.0221956	0.000942754	0.638766	-3.30708	7SK	66791	GRIN2B	Body	GRIN2B (+229755)	EMP1 (+553665)	32.3619	3.94689	30.5355	3.97289
	328	cg00058515	chr 2: 80527798	-0.0212293	0.000214859	0.495398	-3.70087	LRRTM1	3146	CTNNA2;CTNNA2	Body;Body	LRRTM1 (+3688)	CTNNA2 (+787739)	54.3447	4.39534	52.8419	4.54783
	329	cg02280132	chr 11: 120008963	-0.023754	0.00192564	0.70054	-3.10147	TRIM29	-100	TRIM29	TSS200	TRIM29 (-101)		45.8254	3.5522	44.4717	5.31191
	330	cg16646003	chr 5: 6721777	-0.0235885	0.00183575	0.695093	-3.11559	PAPD7	7060	POLS	5'UTR	ADCY2 (-674565)	PAPD7 (+7060)	59.7648	3.40522	57.8426	3.61865
	331	cg01487910	chr 6: 35453938	-0.0227004	0.00130541	0.661345	-3.21479	TEAD3	-4919	TEAD3	Body	TEAD3 (+10922)	RPL10A (+17761)	22.6315	4.11225	19.5541	2.49642
	332	cg13318256	chr 11: 67885605	-0.0215972	0.000547146	0.592363	-3.45655	CHKA	3253	CHKA;CHKA	Body;Body	CHKA (+3252)	TCIRG1 (+79144)	58.7883	3.65135	57.7247	3.14559
	333	cg13941474	chr 13: 112788517	0.0247388	0.00239425	0.708059	3.0364	AK055145	26154			SPACA7 (-242133)	SOX1 (+66605)	29.5905	4.06068	32.0307	3.817
	334	cg14761019	chr 1: 3028485	0.0311161	0.00393673	0.751661	2.88319	MIR4251	-16053	PRDM16;PRDM16	Body;Body	ARHGEF16 (-342661)	PRDM16 (+42744)	32.3997	5.22236	36.1423	4.79548
	335	cg22551145	chr 15: 101661580	0.0232699	0.0017208	0.685211	3.13461	CHSY1	66686			CHSY1 (+130556)	LRRK1 (+202121)	47.3606	4.63928	50.3985	5.79424
	336	cg17026838	chr 10: 114250866	-0.0243601	0.00228756	0.705938	-3.05011	ZDHHC6	-43560	VTI1A	Body	TCF7L2 (-459142)	VTI1A (+44111)	40.193	5.08644	37.685	4.48839
	337	cg16633951	chr 10: 42971575	0.0230028	0.00156552	0.671289	3.16226	LOC84856	500	LOC84856	Body	ZNF33B (+162416)		85.4374	4.02153	87.3369	2.73815
	338	cg25198599	chr 12: 131142648	-0.0254648	0.00276883	0.72174	-2.9923	RIMBP2	58178			RIMBP2 (-140187)	STX2 (+181162)	31.2834	3.76884	29.2606	3.69284
	339	cg03450076	chr 13: 113538039	-0.0297902	0.00379541	0.746039	-2.89468	AK025511	2070	ATP11A;ATP11A	3'UTR;3'UTR	MCF2L (-85495)	ATP11A (+193397)	27.7397	5.19658	24.2229	4.93307
	340	cg17806401	chr 8: 56791649	0.0230367	0.00162076	0.675204	3.15214	LYN	-736	LYN;LYN	TSS1500;TSS1500	LYN (-736)		56.9317	3.17904	59.891	3.37215
	341	cg06865451	chr 1: 39035934	-0.0209511	0.000144275	0.458431	-3.80072	RRAGC	289406			POU3F1 (-523485)	RRAGC (+289405)	33.6007	3.14494	31.5256	3.00388
	342	cg13811808	chr 2: 3680295	0.0302654	0.00392792	0.751661	2.88389	BC113076	-15001	COLEC11;COLEC11	Body;Body	ALLC (-25490)	COLEC11 (+37659)	27.9934	4.5242	30.4294	5.7219
	343	cg11429111	chr 5: 134813329	-0.0218473	0.000901235	0.638766	-3.31967	TIFAB	-25240			C5orf20 (-30292)	NEUROG1 (+58309)	35.1288	3.24835	33.0702	3.09033
	344	cg02583841	chr 19: 21269097	-0.0362472	0.00452365	0.767796	-2.83913	ZNF714	4145	ZNF714	5'UTR	ZNF431 (-55742)	ZNF714 (+4145)	50.3985	6.0484	46.0037	5.88464
	345	cg01942372	chr 2: 109203501	-0.0211114	0.000317293	0.559119	-3.60076	LIMS1	-1255	LIMS1	TSS1500	LIMS1 (-67766)	GCC2 (+137925)	41.9171	3.77275	40.2689	4.01096
	346	cg27187669	chr 1: 16058427	0.0221216	0.00106981	0.640324	3.27149	SLC25A34	-4381	PLEKHM2	Body	SLC25A34 (-4381)		9.1149	2.53608	10.7958	3.6698
	347	cg23172480	chr 6: 117802786	-0.0209608	0.00019989	0.493368	-3.71915	DCBLD1	-1033	DCBLD1	TSS1500	DCBLD1 (-1033)		57.0158	3.67722	56.602	4.58077
	348	cg02351925	chr 19: 4770775	-0.0213828	0.000544834	0.592363	-3.45769	MIR7-3	94	C19orf30;MIR7-3	Body;Body	DPP9 (-46921)	FEM1A (-20952)	39.8082	4.44149	37.4193	3.97139
	349	cg10631544	chr 4: 187109237	0.0300338	0.00394073	0.751661	2.88287	CYP4V2	-3436			CYP4V2 (-3436)		31.6427	5.35322	33.1798	6.30861
	350	cg06637330	chr 5: 3587851	-0.0223034	0.00124355	0.660798	-3.2287	IRX1	-8316			IRX1 (-8316)	C5orf38 (+835590)	39.5965	3.83627	38.0799	3.38849
	351	cg17141599	chr 2: 71123688	-0.0215669	0.000706888	0.607351	-3.38689	VAX2	-4031			VAX2 (-4031)		33.2694	3.93379	31.6626	4.16783
	352	cg10232198	chr 1: 98468025	-0.0231996	0.00187004	0.699357	-3.11013	MIR2682	42882			SNX7 (-659210)	DPYD (-81411)	29.4241	2.58083	27.5576	4.3715
	353	cg26706676	chr 7: 157463300	-0.0220418	0.001063	0.638766	-3.2733	MIR153-2	-96186	PTPRN2;PTPRN2;PTPRN2	Body;Body;Body	DNAJB6 (+333591)	PTPRN2 (+917181)	48.0824	3.09977	46.5018	3.20196
	354	cg10233830	chr 12: 114701413	0.0234801	0.00203787	0.702567	3.08466	TBX5	140328			RBM19 (-297238)	TBX5 (+142475)	53.2668	4.07735	56.3156	3.32608
	355	cg03717755	chr 6: 16136539	-0.0262581	0.00320476	0.731401	-2.94738	MIR4639	-5238	MYLIP	Body	GMPR (-102271)	MYLIP (+7223)	30.4117	4.85394	26.5893	3.82479
	356	cg15836046	chr 1: 2767242	-0.0235479	0.00206027	0.702567	-3.0814	TTC34	-61012			ACTRT2 (-170803)	TTC34 (-61013)	51.1683	4.31971	48.8321	4.18344
	357	cg17466567	chr 3: 185826590	-0.0600115	0.00498305	0.773372	-2.80813	ETV5	-228	ETV5	5'UTR	ETV5 (+310)		83.7106	1.73715	79.4388	12.6748
	358	cg27418402	chr 3: 64008161	-0.0236236	0.00211998	0.702567	-3.07289	PSMD6	952	PSMD6	Body	PSMD6 (+958)		40.1876	4.18514	37.9467	3.73961
	359	cg07622687	chr 17: 65503465	-0.0206691	4.30524e-05	0.371186	-4.09046	PITPNC1	129542	PITPNC1;PITPNC1	Body;Body	NOL11 (-210595)	PITPNC1 (+129542)	22.525	2.83586	20.1514	2.76925
	360	cg20737812	chr 15: 86336631	-0.0212797	0.000543135	0.592363	-3.45853	KLHL25	1558	KLHL25	5'UTR	KLHL25 (+1557)	AKAP13 (+412761)	76.9523	4.47707	74.3652	5.69859
	361	cg02113055	chr 10: 45072520	-0.137967	0.00503893	0.773372	-2.80453	CXCL12	-191975			TMEM72 (-334243)	CXCL12 (-191976)	64.7995	22.6197	54.9556	25.4851
	362	cg26975184	chr 7: 140267040	0.029152	0.00394428	0.751661	2.88258	DENND2A	35302	DENND2A	Body	ADCK2 (-105912)	MKRN1 (-87672)	31.2612	4.32584	34.799	5.52059
	363	cg11794215	chr 17: 35423816	-0.0222073	0.00126634	0.660798	-3.2235	MIR2909	32775			C17orf78 (-309168)	AATF (+117642)	38.3842	3.88247	37.0454	3.69796
	364	cg08952407	chr 5: 42756860	0.0324699	0.00437446	0.762599	2.84982	CCDC152	-59	CCDC152	TSS200	SEPP1 (+55163)	GHR (+332984)	48.7503	5.51731	51.5724	5.17329
	365	cg25492213	chr 13: 41500614	-0.0241272	0.00238953	0.708059	-3.03699	LOC100616668	-4704			ELF1 (+92893)	SLC25A15 (+137068)	24.1662	4.5944	21.3831	3.44942
	366	cg26180006	chr 15: 34333534	-0.0248603	0.00274284	0.72174	-2.99518	AVEN	-2231	CHRM5	5'UTR	AVEN (-2232)		20.2468	3.40695	17.5857	3.52151
	367	cg06574229	chr 9: 140064863	-0.0213612	0.000647666	0.60378	-3.41083	LRRC26	-372	LRRC26	TSS1500	LRRC26 (-373)		53.3698	2.78407	52.7744	4.48379
	368	cg05173749	chr 5: 71452580	0.0210358	0.00042314	0.560325	3.52521	MIR4803	-12713	MAP1B	Body	MAP1B (+49463)	MRPS27 (+163503)	49.1136	3.01416	50.2799	4.12068
	370	cg02169857	chr 2: 110969641	-0.0251377	0.00292287	0.727392	-2.97574	LINC00116	3752	NCRNA00116	Body	NPHP1 (-7003)	LIMS3 (+261010)	88.4744	2.78108	86.1376	4.22736
	369	cg24059022	chr 5: 1095923	0.0213275	0.0006634	0.605158	3.40427	SLC12A7	16249	SLC12A7	Body	SLC12A7 (+16248)	NKD2 (+86756)	21.4253	3.15345	22.7782	3.36106
	371	cg11855409	chr 7: 14380781	-0.0243668	0.00265961	0.721596	-3.00457	ETV1	-349731	DGKB;DGKB	Body;Body	ETV1 (-351140)	DGKB (+500293)	26.9934	3.1706	24.4314	4.11966
	372	cg03651715	chr 6: 151645054	-0.0238016	0.00236298	0.706324	-3.04036	AKAP12	-1611	AKAP12	Body	ZBTB2 (+67622)	AKAP12 (+83921)	46.202	4.45942	44.9428	4.16824
	373	cg26587228	chr 19: 57641846	-0.0239373	0.00245323	0.716987	-3.02905	USP29	1803	USP29	Body	USP29 (+10338)	ZIM3 (+14723)	45.3597	3.67645	43.7825	3.92093
	374	cg05709657	chr 13: 96206104	0.0220108	0.00126237	0.660798	3.2244	CLDN10	1158	CLDN10;CLDN10;CLDN10	Body;Body;Body	CLDN10 (+1158)	DZIP1 (+90852)	60.4091	3.28435	63.3813	4.51937
	375	cg26277026	chr 12: 22486029	0.0262608	0.00341281	0.737375	2.92788	ST8SIA1	1619	ST8SIA1	Body	ST8SIA1 (+1618)	CMAS (+286871)	47.9677	5.33088	50.423	4.79833
	376	cg07936336	chr 17: 11147783	0.0232516	0.00211402	0.702567	3.07373	SHISA6	3044	SHISA6	Body	DNAH9 (-353964)	SHISA6 (+3044)	32.9171	4.50522	34.7499	3.68218
	377	cg14454094	chr 4: 99352003	-0.0227161	0.00176534	0.687028	-3.12711	RAP1GDS1	169477	RAP1GDS1;RAP1GDS1;RAP1GDS1;RAP1GDS1;RAP1GDS1;RAP1GDS1	Body;Body;Body;Body;Body;Body	RAP1GDS1 (+169477)	TSPAN5 (+227808)	26.9851	3.371	24.4217	3.14855
	378	cg18287768	chr 6: 138200387	0.0213911	0.000768665	0.609064	3.36384	TNFAIP3	8038	TNFAIP3	Body	TNFAIP3 (+11807)	PERP (+228272)	37.4237	4.28184	39.5134	4.3684
	379	cg24332685	chr 6: 31508126	0.0210122	0.000474973	0.577835	3.49449	SNORD84	829	BAT1;BAT1	Body;Body	DDX39B (+2125)	MCCD1 (+11388)	65.4814	4.52356	68.3135	3.97637
	380	cg11040268	chr 8: 10447472	-0.0215953	0.000973501	0.638766	-3.29808	AK307207	-42377			PRSS55 (+64417)	RP1L1 (+65144)	53.5179	3.69986	51.6515	3.28988
	381	cg11743470	chr 5: 74327277	-0.0215772	0.000970128	0.638766	-3.29905	GCNT4	-553	GCNT4	TSS1500	GCNT4 (-554)		31.4919	3.33089	29.1624	3.04641
	382	cg14074251	chr 2: 220299116	-0.0204535	2.86297e-05	0.306879	-4.1841	SPEG	-583	SPEG	TSS1500	SPEG (-583)		27.0776	3.3258	25.1673	2.3119
	383	cg07823340	chr 13: 61090581	-0.0230668	0.00209253	0.702567	-3.07678	TDRD3	82399	TDRD3;TDRD3;TDRD3	Body;Body;Body	TDRD3 (+119155)	PCDH20 (+899073)	27.7136	4.54381	24.6352	3.40359
	384	cg07024786	chr 7: 29883787	-0.0265014	0.00360075	0.742739	-2.91117	WIPF3	9504	WIPF3	Body	WIPF3 (+37618)	SCRN1 (+146117)	34.1324	4.03425	31.2362	4.04723
	386	cg17173896	chr 4: 24975754	0.0228847	0.00203342	0.702567	3.08531	CCDC149	6072	CCDC149	5'UTR	LGI2 (+56659)	SOD3 (+178670)	32.6461	4.24982	34.8045	3.96655
	385	cg19616316	chr 5: 10992684	0.026557	0.00367395	0.743225	2.90488	DAP	-231297	CTNND2	Body	DAP (-231298)	CTNND2 (+911425)	29.2091	4.59828	31.3967	4.46263
	387	cg01021184	chr 17: 43099567	0.0264781	0.00364601	0.743225	2.90727	DCAKD	12942			C1QL1 (-53924)	DCAKD (+29410)	85.9418	4.65078	89.0912	3.14847
	388	cg09362608	chr 4: 6659805	-0.0320588	0.00468733	0.771212	-2.82777	LOC93622	-15997			S100P (-35760)	MRFAP1 (+17361)	31.0258	5.07009	27.5879	5.12429
	389	cg18696321	chr 15: 97307874	-0.0343567	0.00492559	0.773372	-2.81186	DQ600899	3966			NR2F2 (+433764)		40.3731	8.97856	38.6384	8.2954
	392	cg10342016	chr 8: 57802622	-0.0222355	0.00161544	0.674938	-3.1531	U6	-27020			PENK (-444030)	IMPAD1 (+103807)	62.7298	4.48833	59.9087	5.30816
	391	cg18639984	chr 12: 115943877	0.0344383	0.00494719	0.773372	2.81045	Metazoa_SRP	-211645			TBX3 (-821909)	MED13L (+771113)	23.4474	5.6093	26.6437	7.08137
	390	cg18940763	chr 22: 29197846	0.0224537	0.00178594	0.687028	3.1237	XBP1	-1286	XBP1;XBP1	TSS1500;TSS1500	XBP1 (-1287)		35.7254	2.53841	38.5466	3.51774
	393	cg26415787	chr 12: 133414334	0.0250264	0.00315769	0.731401	2.95196	GOLGA3	-8908			GOLGA3 (-9047)	CHFR (+49869)	35.9471	3.23577	38.6843	5.52546
	394	cg20307496	chr 22: 37955927	-0.0217079	0.00124596	0.660798	-3.22814	CDC42EP1	-543	CDC42EP1	TSS1500	CDC42EP1 (-543)		43.6823	4.24157	42.1146	4.59092
	395	cg09558281	chr 4: 27102927	-0.0210363	0.000662813	0.605158	-3.40452	STIM2	98379			STIM2 (+240615)		31.6249	4.37018	29.6257	3.26758
	396	cg22256433	chr 17: 7942743	-0.0205792	0.000265737	0.53228	-3.6466	ALOX15B	386	ALOX15B;ALOX15B;ALOX15B	Body;Body;Body	ALOX15B (+386)		63.6588	2.54964	62.7385	3.9224
	397	cg03225093	chr 5: 2008713	-0.0223146	0.00170385	0.68278	-3.13752	IRX4	-125833			IRX4 (-125834)	IRX2 (+743055)	35.3606	3.45082	34.2301	4.17916
	398	cg21808045	chr 17: 75463984	0.0231202	0.0022344	0.704981	3.05717	41161	-7340	SEPT9;SEPT9;SEPT9;SEPT9;SEPT9;SEPT9	Body;5'UTR;Body;Body;Body;Body	TNRC6C (-536333)	SEPT9 (+186493)	28.7966	4.23107	30.4295	4.50873
	399	cg06093152	chr 1: 212662017	0.0205464	0.000247964	0.517365	3.66435	NENF	55789			ATF3 (-119952)	NENF (+55789)	57.22	6.82135	59.9166	5.3122
	400	cg15597096	chr 1: 37113074	-0.0207883	0.000450736	0.560325	-3.50844	CSF3R	-164159			CSF3R (-164160)	GRIK3 (+386769)	37.3535	3.17295	36.3963	4.64175
	401	cg01434302	chr 8: 3267208	-0.0269752	0.00393208	0.751661	-2.88356	CSMD1	-81	CSMD1	Body	NONE		38.8146	4.4835	35.0546	4.47419
	402	cg16714888	chr 15: 79586939	0.0321825	0.00480822	0.771639	2.81961	ANKRD34C	1313	ANKRD34C	Body	RASGRF1 (-203725)	TMED3 (-16551)	23.9599	5.56231	26.3352	5.61176
	403	cg25875953	chr 1: 3001128	0.0214429	0.00106067	0.638766	3.27392	PRDM16	15387	PRDM16;PRDM16	Body;Body	ARHGEF16 (-370018)	PRDM16 (+15387)	33.7898	3.99957	36.1884	4.83059
	404	cg05066959	chr 8: 41519308	-0.0417553	0.00526129	0.776656	-2.79059	MIR486	-1282	ANK1;ANK1;ANK1;ANK1;ANK1;ANK1;ANK1;MIR486;ANK1	Body;Body;Body;Body;Body;Body;Body;TSS1500;Body	NKX6-3 (-14434)	ANK1 (+234971)	24.6837	6.52863	19.7011	6.46043
	405	cg22715906	chr 17: 4098178	-0.024478	0.00300788	0.727483	-2.96693	CYB5D2	51717	ANKFY1;ANKFY1	3'UTR;Body	CYB5D2 (+51717)	ANKFY1 (+69095)	37.0315	3.97395	34.2025	6.08517
	406	cg12361772	chr 17: 9160821	0.0266545	0.00386297	0.749537	2.88914	NTN1	235963	STX8	Body	NTN1 (+235963)	STX8 (+318453)	22.919	3.80454	24.9633	4.71817
	407	cg22866754	chr 8: 788100	-0.0207284	0.000446283	0.560325	-3.51108	BC038783	-45097			DLGAP2 (-661468)	C8orf42 (-292770)	25.5385	2.75046	23.7316	2.53925
	408	cg08361180	chr 10: 103432427	0.0209208	0.000636856	0.60378	3.41541	FBXW4	22316	FBXW4	Body	POLL (-84401)	FBXW4 (+22315)	51.9948	7.20045	54.5126	5.76307
	409	cg10073584	chr 8: 143880111	0.0253856	0.00340331	0.737375	2.92875	LY6D	-12103			GML (-36105)	LY6D (-12104)	47.0971	3.90509	50.1209	4.99266
	410	cg15416442	chr 14: 59244557	-0.0210616	0.000763629	0.609064	-3.36565	Mir_548	-6602			DAAM1 (-410841)	DACT1 (+139801)	42.5242	3.94628	40.8758	3.4761
	411	cg07571519	chr 10: 73472315	-0.0222287	0.00176487	0.687028	-3.12719	CDH23	-45	C10orf105;C10orf105;CDH23	3'UTR;3'UTR;Body	C10orf105 (+7262)	CDH23 (+315625)	27.1534	4.10567	24.7157	3.40838
	412	cg19596804	chr 1: 238540640	-0.0220893	0.00164968	0.678813	-3.14698	LOC339535	108677			ZP4 (-486419)		22.388	3.23424	19.9125	3.57289
	413	cg01227744	chr 2: 20644371	-0.0244669	0.00310069	0.731401	-2.95758	RHOB	-2463			RHOB (-2463)		53.3867	4.6825	52.5021	5.31869
	415	cg27665327	chr 15: 80866134	-0.0227341	0.00214602	0.702567	-3.06924	FAM108C1	-121517	ARNT2	Body	FAM108C1 (-121517)	ARNT2 (+169443)	31.1301	3.8603	29.4564	3.27223
	414	cg05375811	chr 12: 131506021	0.0486382	0.00553198	0.784535	2.7743	AX748157	6336	GPR133	Body	SFSWAP (-689613)	GPR133 (+67570)	39.5806	8.47448	43.0633	7.27483
	416	cg13860928	chr 1: 209915875	-0.0217363	0.00144195	0.668622	-3.18612	TRAF3IP3	-13518			TRAF3IP3 (-13518)	HSD11B1 (+37740)	57.0776	5.32498	54.9017	5.06351
	417	cg24885650	chr 10: 11069298	-0.0203317	0.000152478	0.465987	-3.787	CELF2	9406	CUGBP2;CUGBP2	Body;Body	CELF2 (+9406)	USP6NL (+504975)	37.196	3.27755	34.0325	4.61286
	418	cg27465263	chr 8: 142350533	-0.0265103	0.00394981	0.751661	-2.88214	LOC731779	-114	LOC731779	TSS200	SLC45A4 (-111861)	GPR20 (+26831)	39.6839	5.25426	38.3836	6.82258
	419	cg20760883	chr 7: 133128032	-0.0215588	0.00131062	0.661345	-3.21364	EXOC4	-133183	EXOC4;EXOC4	Body;Body	LRGUK (-684072)	EXOC4 (+190210)	20.5528	3.10471	18.2193	2.70255
	420	cg18125510	chr 14: 100841768	-0.0213431	0.00112023	0.647194	-3.25845	WARS	159	WARS;WDR25;WARS;WARS;WDR25;WARS;WARS;WARS	1stExon;TSS1500;5'UTR;5'UTR;TSS1500;1stExon;5'UTR;5'UTR	WARS (+911)		67.5751	3.19893	66.8777	3.89179
	421	cg14624207	chr 11: 68142198	0.0201188	7.70942e-06	0.254796	4.4731	LRP5	62091	LRP5	Body	PPP6R3 (-85987)	LRP5 (+62091)	71.9579	3.40708	74.3307	3.27326
	422	cg13731777	chr 10: 95564722	-0.0238992	0.00289325	0.727163	-2.97886	LGI1	47031			SLC35G1 (-89007)	LGI1 (+47157)	28.2068	3.2359	25.7827	3.92565
	423	cg20092736	chr 11: 67982703	-0.020112	7.69146e-06	0.254796	-4.4736	SUV420H1	-1635			SUV420H1 (-1920)		41.2483	3.52456	38.5261	3.86035
	424	cg24598948	chr 10: 42863539	0.0509634	0.00562222	0.785589	2.76904	LOC441666	-46	LOC441666	TSS200	ZNF33B (+270452)		74.632	9.89417	78.8501	6.15548
	425	cg14692895	chr 11: 32618579	0.0204402	0.000345862	0.559119	3.57828	EIF3M	13189	EIF3M	Body	PRRG4 (-232901)	EIF3M (+13189)	17.4964	2.72553	18.6759	3.08526
	426	cg00129811	chr 6: 116726398	0.02564	0.00369347	0.743226	2.90322	DSE	-27293	DSE;DSE	Body;Body	FAM26F (-56157)	DSE (+125116)	65.0726	3.80531	68.3527	3.98135
	427	cg17354476	chr 10: 29698255	0.0268958	0.0041549	0.756812	2.86616	LOC387647	-227	LOC387647	TSS1500	LYZL1 (+120266)	SVIL (+225645)	40.8545	4.56092	43.5207	4.24987
	428	cg18638180	chr 21: 46379089	0.0219019	0.00170387	0.68278	3.13751	FAM207A	19135	C21orf70	Body	ADARB1 (-115403)	C21orf67 (-19262)	47.8513	4.15565	51.1361	5.94964
	429	cg09030187	chr 1: 205263738	-0.0210746	0.000978656	0.638766	-3.29659	NUAK2	14122			NUAK2 (+27144)	TMCC2 (+66701)	37.8892	4.65601	36.9884	5.03868
	430	cg00661485	chr 5: 169533372	0.0232823	0.00267594	0.721596	3.0027	FOXI1	456	FOXI1;FOXI1	1stExon;1stExon	FOXI1 (+456)		28.1683	3.06964	30.2025	3.74709
	431	cg12404745	chr 1: 89846031	0.0265327	0.0041217	0.756812	2.86869	GBP6	16596	GBP6	Body	LRRC8B (-144365)	GBP6 (+16596)	25.4715	5.96208	26.4941	5.05407
	432	cg20231694	chr 11: 70691944	-0.0203028	0.00024341	0.516726	-3.6691	SHANK2-AS3	-16950	SHANK2	Body	SHANK2 (+243897)	CTTN (+447333)	52.7395	4.67075	50.6663	4.40459
	433	cg09102260	chr 13: 31294292	0.0209581	0.000946125	0.638766	3.30608	ALOX5AP	6678			ALOX5AP (+6678)	HSPH1 (+441824)	20.9511	2.05334	23.0319	3.32736
	434	cg08230910	chr 7: 80507149	-0.0236397	0.00291262	0.727392	-2.97681	SEMA3C	41518	SEMA3C	Body	SEMA3C (+41517)	CD36 (+231505)	25.1258	4.29457	21.8068	3.67928
	436	cg02792322	chr 13: 21280448	-0.0204243	0.0004248	0.560325	-3.52418	IL17D	2967	IL17D	Body	IL17D (+2967)	N6AMT2 (+67608)	31.1662	3.05056	28.736	3.00131
	435	cg11284147	chr 8: 144437914	0.0285854	0.00469779	0.771212	2.82706	BC039358	4235			TOP1MT (-20865)	RHPN1 (-13110)	27.1896	4.25052	29.9022	5.63328
	437	cg03317820	chr 7: 1141533	0.0314472	0.00506774	0.77362	2.8027	GPER	10169	C7orf50;C7orf50;C7orf50	Body;Body;Body	GPER (+13811)	ZFAND2A (+58321)	41.3454	5.27243	43.4802	5.59725
	440	cg05557291	chr 12: 121958763	-0.0279459	0.00459255	0.768928	-2.8343	KDM2B	-10921	KDM2B;KDM2B	Body;Body	KDM2B (+60156)	RNF34 (+120862)	22.6433	5.97255	20.5612	4.79215
	438	cg01174276	chr 19: 39805850	0.0204664	0.000497172	0.582675	3.48228	LRFN1	126	LRFN1	1stExon	LRFN1 (+125)		22.4187	2.80618	23.449	3.15087
	439	cg02698900	chr 8: 1094770	0.028858	0.00476705	0.771639	2.82237	LOC286083	156057			C8orf42 (-599440)	DLGAP2 (-354798)	41.8514	5.17951	45.6515	4.45631
	441	cg11414610	chr 19: 16528319	-0.022128	0.0020038	0.702567	-3.08967	EPS15L1	17788	EPS15L1	Body	EPS15L1 (+54442)	KLF2 (+92669)	23.4174	3.01778	20.9424	3.36752
	442	cg22367310	chr 2: 241856114	-0.0241616	0.00323668	0.731434	-2.94432	C2orf54	-20541			SNED1 (-82140)	AGXT (+47953)	70.9972	3.17086	69.9343	5.28614
	443	cg27333269	chr 1: 15739283	-0.020453	0.000525019	0.591541	-3.46766	EFHD2	2893	EFHD2	Body	CTRC (-25654)	EFHD2 (+2893)	58.8669	5.6234	56.7263	6.44646
	444	cg05710676	chr 3: 18258805	-0.020902	0.00100374	0.638766	-3.28948	SATB1	208024			TBC1D5 (-474566)	SATB1 (+221459)	24.692	4.98659	21.5761	3.23197
	445	cg08344351	chr 16: 81507328	-0.021238	0.00131229	0.661345	-3.21328	CMIP	-21625	CMIP	Body	PLCG2 (-305570)	CMIP (+28554)	37.6833	4.47996	36.7212	4.94727
	446	cg10820931	chr 10: 118154247	-0.0264914	0.00429845	0.760047	-2.85539	PNLIPRP3	-33176			GFRA1 (-121122)	PNLIPRP3 (-33176)	25.2814	5.54754	22.4564	4.10527
	447	cg14415079	chr 9: 136655966	0.0250234	0.00372377	0.743226	2.90066	VAV2	-617	VAV2;VAV2	Body;Body	SARDH (-52488)	VAV2 (+201479)	29.8115	3.55895	32.161	4.66814
	448	cg08597839	chr 1: 29461008	-0.0286543	0.00488734	0.773372	-2.81437	TMEM200B	-10587			TMEM200B (-10588)	SRSF4 (+47628)	51.961	4.14397	49.8781	5.36176
	449	cg04425920	chr 10: 50604518	-0.020832	0.000990486	0.638766	-3.29322	DRGX	-1032			DRGX (-4612)		81.2528	2.2246	80.1276	3.73271
	450	cg05683292	chr 5: 155133584	0.0312738	0.00523919	0.776656	2.79195	SGCD	-1478			SGCD (-620182)	KIF4B (+740325)	21.2213	4.2031	23.771	5.30373
	451	cg13975303	chr 22: 36850894	-0.020184	0.00034291	0.559119	-3.58052	TXN2	26793			MYH9 (-66832)	TXN2 (+26792)	69.5894	2.8618	68.4574	3.01118
	452	cg06753513	chr 17: 3977385	-0.0202777	0.000427413	0.560325	-3.52255	ZZEF1	-3167	ZZEF1	Body	ATP2A3 (-109628)	ZZEF1 (+68867)	20.7089	2.83665	18.3444	2.50545
	453	cg13319506	chr 10: 124462188	-0.0201758	0.000344176	0.559119	-3.57956	C10orf120	-2850			DMBT1 (+142008)	CUZD1 (+148121)	24.3461	3.68695	22.3347	3.61934
	454	cg04612073	chr 7: 4769938	-0.0212779	0.00144447	0.668622	-3.18561	KIAA0415	-45323	FOXK1	Body	KIAA0415 (-45323)	FOXK1 (+48009)	43.1467	4.56262	40.1477	5.47388
	455	cg14501985	chr 9: 35603437	-0.0200913	0.000240847	0.516726	-3.6718	TESK1	-1843			TESK1 (-1843)		30.756	2.05805	28.7286	2.84748
	456	cg07846737	chr 19: 5068701	0.03376	0.00557989	0.784535	2.7715	KDM4B	-1927	KDM4B	Body	KDM4B (+99578)	PTPRS (+272112)	35.7973	5.12393	38.4139	6.17454
	457	cg08810464	chr 13: 34713954	-0.0229684	0.00276621	0.72174	-2.99259	U5	-310168			NBEA (-802469)	RFC3 (+321749)	34.3922	4.44798	32.0619	4.61867
	458	cg04914290	chr 16: 88845204	-0.026507	0.00443669	0.765743	-2.84532	PIEZO1	6168	FAM38A	Body	PIEZO1 (+6167)	CTU2 (+72314)	37.2391	5.34388	34.0904	5.33642
	459	cg14152306	chr 14: 104026839	0.0200188	0.000194686	0.493368	3.72581	BAG5	662	BAG5;BAG5;BAG5	Body;Body;Body	BAG5 (+1815)	TRMT61A (+31331)	19.5611	2.26161	21.1727	2.32781
	460	cg17715896	chr 7: 33943437	0.0199632	0.000129984	0.454254	3.82649	BMPER	-1085			BMPER (-1085)		76.8416	4.90049	78.9195	4.15608
	461	cg21398996	chr 13: 33923778	0.0204675	0.000720614	0.609064	3.38161	STARD13	989			RFC3 (-468427)	STARD13 (-63878)	53.3146	2.95351	55.747	4.68044
	462	cg22511019	chr 7: 130524453	0.0219326	0.00209782	0.702567	3.07602	MIR29A	37116			MKLN1 (-488141)	KLF14 (-105566)	38.887	5.04494	39.8581	5.06792
	463	cg14494607	chr 6: 45906675	0.0206298	0.000927247	0.638766	3.31172	CLIC5	-1341	CLIC5;CLIC5	Body;Body	SUPT3H (-561006)	CLIC5 (+141409)	17.4101	2.19984	19.3694	2.81857
	464	cg23434815	chr 10: 75839302	-0.0295207	0.00513042	0.774933	-2.79873	AP3M1	71217	VCL;VCL	Body;Body	AP3M1 (+71523)	VCL (+81431)	33.2421	6.0852	28.74	5.00334
	465	cg16717546	chr 7: 24474486	-0.0226116	0.0025793	0.718869	-3.01388	MPP6	-138598			MPP6 (-138598)	NPY (+150680)	25.3294	3.45745	23.2285	3.38243
	466	cg23876072	chr 11: 69931921	-0.0229508	0.00284223	0.724471	-2.9843	ANO1	402	ANO1;ANO1	Body;Body	FADD (-117347)	ANO1 (+7514)	29.9725	3.18795	27.4204	3.55951
[truncated: 534 more rows]

## Sheet: T4. Blood T1 MPs
	Supplementary Table 4. T1 Top 1000 Methylated Positions in Blood
[truncated: 1,003 more rows]

## Sheet: T5. Blood T2 MPs
	Supplementary Table 5. T2 Top 1000 Methylated Positions in Blood
[truncated: 1,003 more rows]

## Sheet: T6. Blood GW-significant probes
	Supplementary Table 6. Genome-wide Significant Positions in Blood
[truncated: 276 more rows]

[truncated: 4 more sheets: T7. Brain Genomic Annotation, T8. Blood Genomic Annotation, T9. GRN, T10. Correlation ]
